# Supplementary material
Source: publisher site journal article supplement (https://www.spandidos-publications.com/1578/downloadSupplementary)
Supplement: Supplementary file 1 [file downloadSupplementary]

## Sheet: DE Gene Analysis
	2C 2-fold up vs. 3C											#		3C 2-fold up vs. 2C											#		No Significant Difference
												#													#
	id	baseMean	baseMeanA	baseMeanB	foldChange	log2FoldChange	log2AverageIntensity	pval	padj	'-Log10(pval)	Annotation	#		id	baseMean	baseMeanA	baseMeanB	foldChange	log2FoldChange	log2AverageIntensity	pval	padj	'-Log10(pval)	Annotation	#		id	baseMean	baseMeanA	baseMeanB	foldChange	log2FoldChange	log2AverageIntensity	pval	padj	'-Log10(pval)
TLCD2	ENSOCUG00000000087	77.4117	119.962	34.8609	0.290598	-1.7829	6.01499	0.030703	1	1.51282	TLC domain containing 2 [Source:HGNC Symbol;Acc:HGNC:33522]	#	-	ENSOCUG00000000049	238.725	126.79	350.66	2.76568	1.46763	7.72011	0.0107875	0.572972	1.96708	-	#		ENSOCUG00000000001	23.5199	22.432	24.6077	1.09699	0.13355	4.55426	0.955803	1	0.0196318
ERG	ENSOCUG00000000104	183.257	290.641	75.8737	0.261057	-1.93757	7.21431	0.00196887	0.169721	2.70578	v-ets avian erythroblastosis virus E26 oncogene homolog [Source:HGNC Symbol;Acc:HGNC:3446]	#	BNC1	ENSOCUG00000000136	316.186	204.814	427.559	2.08755	1.06181	8.20907	0.0478245	1	1.32035	basonuclin 1 [Source:HGNC Symbol;Acc:HGNC:1081]	#		ENSOCUG00000000004	461.707	567.627	355.786	0.626795	-0.673934	8.81183	0.177374	1	0.751109
ADAMTS9	ENSOCUG00000000109	315.949	434.011	197.887	0.455949	-1.13305	8.19506	0.0351026	1	1.45466	ADAM metallopeptidase with thrombospondin type 1 motif, 9 [Source:HGNC Symbol;Acc:HGNC:13202]	#	NFIL3	ENSOCUG00000000145	481.1	231.147	731.053	3.16272	1.66116	8.68325	0.00105558	0.103655	2.97651	nuclear factor, interleukin 3 regulated [Source:HGNC Symbol;Acc:HGNC:7787]	#		ENSOCUG00000000005	88.9778	88.7527	89.2029	1.00507	0.00729864	6.47537	1	1	0
CDO1	ENSOCUG00000000148	691.379	1247.41	135.342	0.108498	-3.20426	8.6826	5.79127e-10	3.04524e-07	9.23723	cysteine dioxygenase type 1 [Source:HGNC Symbol;Acc:HGNC:1795]	#	PEBP4	ENSOCUG00000000195	65.633	19.5061	111.76	5.72949	2.51841	5.54506	0.00559509	0.369709	2.25219	phosphatidylethanolamine-binding protein 4 [Source:HGNC Symbol;Acc:HGNC:28319]	#		ENSOCUG00000000006	228.696	237.974	219.419	0.922026	-0.117121	7.8361	0.844537	1	0.0733816
WNT2B	ENSOCUG00000000266	65.533	103.382	27.6837	0.267779	-1.90088	5.7414	0.0317504	1	1.49825	wingless-type MMTV integration site family, member 2B [Source:HGNC Symbol;Acc:HGNC:12781]	#	HK2	ENSOCUG00000000197	507.609	316.974	698.243	2.20284	1.13936	8.8779	0.0216432	0.899013	1.66468	hexokinase 2 [Source:HGNC Symbol;Acc:HGNC:4923]	#		ENSOCUG00000000008	5.95186	7.80244	4.10128	0.525641	-0.92785	2.5	0.810331	1	0.0913375
ADAMTS8	ENSOCUG00000000370	31.3598	56.5677	6.15192	0.108753	-3.20087	4.22147	0.0157065	0.744054	1.80392	ADAM metallopeptidase with thrombospondin type 1 motif, 8 [Source:HGNC Symbol;Acc:HGNC:224]	#	-	ENSOCUG00000000297	294.905	115.086	474.723	4.12495	2.04438	7.86876	0.000267002	0.0342436	3.57349	-	#		ENSOCUG00000000009	1214.49	1079.66	1349.32	1.24976	0.321654	10.2372	0.473802	1	0.324403
WNT-5A	ENSOCUG00000000380	510.835	830.96	190.71	0.229505	-2.1234	8.63693	3.32267e-05	0.00609478	4.47851	Oryctolagus cuniculus WNT-5A protein (WNT-5A), mRNA. [Source:RefSeq mRNA;Acc:NM_001082665]	#	ATP1B3	ENSOCUG00000000338	690.641	456.443	924.839	2.02619	1.01877	9.34367	0.0322907	1	1.49092	Oryctolagus cuniculus ATPase, Na+/K+ transporting, beta 3 polypeptide (ATP1B3), mRNA. [Source:RefSeq mRNA;Acc:NM_001082091]	#		ENSOCUG00000000010	140.569	196.036	85.1016	0.434111	-1.20386	7.01305	0.0680954	1	1.16688
DCT	ENSOCUG00000000407	71.3348	117.037	25.633	0.219017	-2.19088	5.77537	0.011482	0.59398	1.93998	dopachrome tautomerase [Source:HGNC Symbol;Acc:HGNC:2709]	#	DAPK2	ENSOCUG00000000435	85.0266	42.9134	127.14	2.9627	1.56691	6.20681	0.0470909	1	1.32706	death-associated protein kinase 2 [Source:HGNC Symbol;Acc:HGNC:2675]	#		ENSOCUG00000000012	629.559	739.281	519.837	0.703166	-0.508062	9.27595	0.288094	1	0.540466
CRABP1	ENSOCUG00000000431	2132.83	3372.6	893.054	0.264797	-1.91704	10.7611	1.9752e-05	0.00389485	4.70439	cellular retinoic acid binding protein 1 [Source:HGNC Symbol;Acc:HGNC:2338]	#	KCNMB1	ENSOCUG00000000539	32.0475	9.75305	54.342	5.57179	2.47814	4.52492	0.0471112	1	1.32688	Oryctolagus cuniculus potassium large conductance calcium-activated channel, subfamily M, beta member 1 (KCNMB1), mRNA. [Source:RefSeq mRNA;Acc:NM_001082225]	#		ENSOCUG00000000013	47.2648	36.0863	58.4433	1.61954	0.695586	5.52117	0.487455	1	0.312066
FRMD5	ENSOCUG00000000664	27.3836	51.6912	3.07596	0.0595065	-4.07081	3.65644	0.0073954	0.443584	2.13104	Uncharacterized protein [Source:UniProtKB/TrEMBL;Acc:G1SDT2]	#	TGM5	ENSOCUG00000000551	395.924	234.073	557.774	2.38291	1.25272	8.49718	0.015403	0.734087	1.81239	transglutaminase 5 [Source:HGNC Symbol;Acc:HGNC:11781]	#		ENSOCUG00000000014	11085.5	12166	10005.1	0.822383	-0.282117	13.4295	0.500909	1	0.300241
SMTNL2	ENSOCUG00000000696	148.784	215.542	82.0256	0.380555	-1.39382	7.05492	0.0324735	1	1.48847	smoothelin-like 2 [Source:HGNC Symbol;Acc:HGNC:24764]	#	HAP1	ENSOCUG00000000605	38.1994	9.75305	66.6458	6.83333	2.77259	4.67215	0.017563	0.800743	1.7554	huntingtin-associated protein 1 [Source:HGNC Symbol;Acc:HGNC:4812]	#		ENSOCUG00000000015	344.433	362.813	326.052	0.898677	-0.154126	8.42602	0.772811	1	0.111927
PAMR1	ENSOCUG00000000721	982.357	1355.67	609.04	0.449253	-1.1544	9.82759	0.012297	0.615826	1.9102	peptidase domain containing associated with muscle regeneration 1 [Source:HGNC Symbol;Acc:HGNC:24554]	#	CHP2	ENSOCUG00000000793	162.001	79.975	244.026	3.05128	1.60942	7.12618	0.0118212	0.601545	1.92734	calcineurin-like EF-hand protein 2 [Source:HGNC Symbol;Acc:HGNC:24927]	#		ENSOCUG00000000016	12.5414	10.7284	14.3545	1.338	0.420073	3.63339	0.865733	1	0.0626159
DENND5B	ENSOCUG00000000778	135.442	196.036	74.8484	0.381809	-1.38908	6.92044	0.0383124	1	1.41666	DENN/MADD domain containing 5B [Source:HGNC Symbol;Acc:HGNC:28338]	#	DES	ENSOCUG00000000968	59.306	26.3332	92.2788	3.50427	1.80912	5.62337	0.0485261	1	1.31402	desmin [Source:RefSeq peptide;Acc:NP_001164952]	#		ENSOCUG00000000017	176.743	164.827	188.659	1.14459	0.194832	7.46222	0.756695	1	0.121079
PMEL	ENSOCUG00000000999	593.448	868.021	318.875	0.367358	-1.44474	9.03922	0.00317804	0.247174	2.49784	Uncharacterized protein [Source:UniProtKB/TrEMBL;Acc:G1SEI3]	#	XDH	ENSOCUG00000001230	1358.86	607.615	2110.11	3.47277	1.79609	10.1451	8.84642e-05	0.0139552	4.05323	xanthine dehydrogenase [Source:HGNC Symbol;Acc:HGNC:12805]	#		ENSOCUG00000000018	149.422	170.678	128.165	0.750916	-0.413277	7.2085	0.523358	1	0.281201
GEM	ENSOCUG00000001030	301.244	407.677	194.811	0.477855	-1.06535	8.13861	0.0493916	1	1.30635	GTP binding protein overexpressed in skeletal muscle [Source:HGNC Symbol;Acc:HGNC:4234]	#	UCHL1	ENSOCUG00000001353	228.922	69.2466	388.596	5.61177	2.48846	7.3579	3.94891e-05	0.00699933	4.40352	ubiquitin carboxyl-terminal esterase L1 (ubiquitin thiolesterase) [Source:HGNC Symbol;Acc:HGNC:12513]	#		ENSOCUG00000000020	26.9584	28.2838	25.633	0.906278	-0.141975	4.75092	0.942386	1	0.0257711
IBSP	ENSOCUG00000001046	74.6733	126.79	22.5571	0.177909	-2.49079	5.7409	0.00396176	0.290683	2.40211	integrin-binding sialoprotein [Source:HGNC Symbol;Acc:HGNC:5341]	#	MAGI2	ENSOCUG00000001407	58.3307	24.3826	92.2788	3.78462	1.92015	5.56785	0.0384058	1	1.4156	membrane associated guanylate kinase, WW and PDZ domain containing 2 [Source:HGNC Symbol;Acc:HGNC:18957]	#		ENSOCUG00000000021	418.918	396.949	440.888	1.11069	0.151458	8.70854	0.768222	1	0.114513
JUN	ENSOCUG00000001212	2431.43	3303.36	1559.51	0.472099	-1.08284	11.1483	0.0131303	0.651354	1.88173	jun proto-oncogene [Source:HGNC Symbol;Acc:HGNC:6204]	#	IGFBP6	ENSOCUG00000001412	3786.9	2404.13	5169.67	2.15033	1.10456	11.7836	0.0103485	0.559066	1.98512	insulin-like growth factor binding protein 6 [Source:HGNC Symbol;Acc:HGNC:5475]	#		ENSOCUG00000000022	187.546	183.357	191.735	1.04569	0.0644554	7.55074	0.923737	1	0.0344516
ADAM19	ENSOCUG00000001235	183.607	276.987	90.2282	0.325749	-1.61817	7.30459	0.00887365	0.505963	2.0519	ADAM metallopeptidase domain 19 [Source:HGNC Symbol;Acc:HGNC:197]	#	DCUN1D2	ENSOCUG00000001448	75.0234	33.1604	116.887	3.52489	1.81758	5.96018	0.0294465	1	1.53097	DCN1, defective in cullin neddylation 1, domain containing 2 [Source:HGNC Symbol;Acc:HGNC:20328]	#		ENSOCUG00000000023	55.9675	56.5677	55.3673	0.97878	-0.0309437	5.80643	0.995398	1	0.00200331
NES	ENSOCUG00000001454	533.129	821.207	245.052	0.298404	-1.74466	8.80927	0.000502847	0.0583266	3.29856	nestin [Source:HGNC Symbol;Acc:HGNC:7756]	#	ACE	ENSOCUG00000001555	117.387	60.4689	174.304	2.88255	1.52734	6.68179	0.0300387	1	1.52232	Oryctolagus cuniculus angiotensin I converting enzyme (peptidyl-dipeptidase A) 1 (ACE), transcript variant 1, mRNA. [Source:RefSeq mRNA;Acc:NM_001082395]	#		ENSOCUG00000000024	85.1391	98.5058	71.7724	0.728611	-0.456779	6.39375	0.562208	1	0.250103
ADAMTS6	ENSOCUG00000001525	90.9409	152.148	29.7343	0.195431	-2.35527	6.07169	0.00312438	0.24521	2.50524	ADAM metallopeptidase with thrombospondin type 1 motif, 6 [Source:HGNC Symbol;Acc:HGNC:222]	#	SLC6A11	ENSOCUG00000001627	39.2748	7.80244	70.7471	9.06731	3.18067	4.55426	0.00718942	0.437889	2.14331	solute carrier family 6 (neurotransmitter transporter), member 11 [Source:HGNC Symbol;Acc:HGNC:11044]	#		ENSOCUG00000000025	1038.71	737.33	1340.09	1.81749	0.861951	9.95714	0.0589106	1	1.22981
PTPRT	ENSOCUG00000001573	68.4839	108.259	28.709	0.265188	-1.91491	5.80089	0.0277549	1	1.55666	protein tyrosine phosphatase, receptor type, T [Source:HGNC Symbol;Acc:HGNC:9682]	#	KIF17	ENSOCUG00000001822	71.8099	18.5308	125.089	6.75034	2.75496	5.58933	0.00193463	0.168612	2.7134	kinesin family member 17 [Source:HGNC Symbol;Acc:HGNC:19167]	#		ENSOCUG00000000028	598.475	631.998	564.952	0.893914	-0.161792	9.22288	0.738689	1	0.131539
FLRT3	ENSOCUG00000001599	114.236	183.357	45.1141	0.246045	-2.02301	6.50701	0.00524134	0.359488	2.28056	fibronectin leucine rich transmembrane protein 3 [Source:HGNC Symbol;Acc:HGNC:3762]	#	PRP	ENSOCUG00000002086	850.241	550.072	1150.41	2.09138	1.06446	9.6357	0.0223973	0.917708	1.6498	Oryctolagus cuniculus prion protein (PRP), mRNA. [Source:RefSeq mRNA;Acc:NM_001082021]	#		ENSOCUG00000000030	98.9934	118.012	79.975	0.677686	-0.561311	6.60213	0.448338	1	0.348394
PCSK5	ENSOCUG00000001616	435.699	662.232	209.165	0.315849	-1.66269	8.53985	0.00125342	0.119113	2.9019	proprotein convertase subtilisin/kexin type 5 [Source:HGNC Symbol;Acc:HGNC:8747]	#	VSIG8	ENSOCUG00000002342	47.965	8.77774	87.1522	9.92877	3.31162	4.78966	0.00239001	0.198434	2.6216	V-set and immunoglobulin domain containing 8 [Source:HGNC Symbol;Acc:HGNC:32063]	#		ENSOCUG00000000031	3.43857	5.85183	1.02532	0.175214	-2.51281	1.29248	0.660663	1	0.18002
HGF	ENSOCUG00000001618	106.221	156.049	56.3926	0.361378	-1.46842	6.55164	0.0435926	1	1.36059	Oryctolagus cuniculus hepatocyte growth factor (hepapoietin A; scatter factor) (HGF), mRNA. [Source:RefSeq mRNA;Acc:NM_001168707]	#	IGSF9	ENSOCUG00000002356	126.877	70.2219	183.532	2.6136	1.38604	6.82687	0.0426328	1	1.37026	immunoglobulin superfamily, member 9 [Source:HGNC Symbol;Acc:HGNC:18132]	#		ENSOCUG00000000032	9.07784	5.85183	12.3038	2.10256	1.07215	3.08496	0.679125	1	0.16805
ZFHX4	ENSOCUG00000001723	105.245	154.098	56.3926	0.365953	-1.45027	6.54257	0.046835	1	1.32943	zinc finger homeobox 4 [Source:HGNC Symbol;Acc:HGNC:30939]	#	-	ENSOCUG00000002392	5562.85	2120.31	9005.39	4.2472	2.08651	12.0933	2.06611e-06	0.000517347	5.68485	Uncharacterized protein [Source:UniProtKB/TrEMBL;Acc:G1SHG0]	#		ENSOCUG00000000034	169.691	199.937	139.444	0.697436	-0.519867	7.38347	0.402763	1	0.394951
FBXO10	ENSOCUG00000001992	293.254	419.381	167.127	0.398509	-1.32731	8.04846	0.015515	0.737198	1.80925	F-box protein 10 [Source:HGNC Symbol;Acc:HGNC:13589]	#	MFAP5	ENSOCUG00000002407	591.66	317.949	865.37	2.72172	1.44452	9.03491	0.00318074	0.247174	2.49747	microfibrillar associated protein 5 [Source:HGNC Symbol;Acc:HGNC:29673]	#		ENSOCUG00000000038	65.8081	52.6665	78.9497	1.49905	0.584049	6.01084	0.501419	1	0.2998
NDNF	ENSOCUG00000002038	274.473	432.06	116.887	0.270533	-1.88612	7.81203	0.00086882	0.0901687	3.06107	neuron-derived neurotrophic factor [Source:HGNC Symbol;Acc:HGNC:26256]	#	HBQ1_1	ENSOCUG00000002435	423.22	269.184	577.255	2.14446	1.10062	8.62276	0.0307961	1	1.5115	Oryctolagus cuniculus theta 1 globin (HBQ1_1), mRNA. [Source:RefSeq mRNA;Acc:NM_001171416]	#		ENSOCUG00000000040	86.0019	84.8515	87.1522	1.02711	0.0385972	6.42617	0.97689	1	0.0101544
PPP1R10	ENSOCUG00000002132	200.188	350.134	50.2407	0.14349	-2.80098	7.05127	1.11071e-05	0.00236775	4.9544	protein phosphatase 1, regulatory subunit 10 [Source:HGNC Symbol;Acc:HGNC:9284]	#	RLA-DQA	ENSOCUG00000002480	942.557	248.703	1636.41	6.57979	2.71804	9.3173	2.65893e-08	1.02304e-05	7.57529	Uncharacterized protein [Source:UniProtKB/TrEMBL;Acc:G1SHN0]	#		ENSOCUG00000000051	82.5758	98.5058	66.6458	0.676568	-0.563694	6.34029	0.477217	1	0.321284
PTN	ENSOCUG00000002203	3758.85	5237.39	2280.31	0.435391	-1.19962	11.7548	0.00546722	0.365447	2.26223	pleiotrophin [Source:HGNC Symbol;Acc:HGNC:9630]	#	NKIRAS1	ENSOCUG00000002483	498.193	224.32	772.066	3.44181	1.78317	8.701	0.000432391	0.052469	3.36412	NFKB inhibitor interacting Ras-like 1 [Source:HGNC Symbol;Acc:HGNC:17899]	#		ENSOCUG00000000055	5.53923	3.90122	7.17724	1.83974	0.879505	2.40368	0.834739	1	0.0784493
AMPH	ENSOCUG00000002244	45.2892	73.1479	17.4304	0.238291	-2.06921	5.15814	0.0474113	1	1.32412	amphiphysin [Source:HGNC Symbol;Acc:HGNC:471]	#	RLA-DQB	ENSOCUG00000002485	1381.94	627.121	2136.77	3.40727	1.76861	10.1769	0.000109776	0.0164925	3.95949	Uncharacterized protein [Source:UniProtKB/TrEMBL;Acc:G1SHN5]	#		ENSOCUG00000000057	2956.79	2908.36	3005.21	1.0333	0.0472625	11.5296	0.913055	1	0.0395033
BST1	ENSOCUG00000002336	222.645	314.048	131.241	0.417901	-1.25877	7.66546	0.0306784	1	1.51317	bone marrow stromal cell antigen 1 [Source:HGNC Symbol;Acc:HGNC:1118]	#	PODN	ENSOCUG00000002562	2748.57	1591.7	3905.45	2.45364	1.29492	11.2838	0.00302581	0.23986	2.51916	podocan [Source:HGNC Symbol;Acc:HGNC:23174]	#		ENSOCUG00000000059	178.443	178.481	178.406	0.99958	-0.000606557	7.47932	1	1	0
KLF6	ENSOCUG00000002470	650.766	871.923	429.609	0.492715	-1.02117	9.25747	0.0331351	1	1.47971	Kruppel-like factor 6 [Source:HGNC Symbol;Acc:HGNC:2235]	#	KRT75	ENSOCUG00000002622	96.8428	1.95061	191.735	98.2949	6.61904	4.27345	1.16169e-09	5.55325e-07	8.93491	keratin 75 [Source:HGNC Symbol;Acc:HGNC:24431]	#		ENSOCUG00000000060	333.754	339.406	328.103	0.966696	-0.0488656	8.38244	0.932032	1	0.0305692
EMILIN2	ENSOCUG00000002553	341.969	478.875	205.064	0.428221	-1.22357	8.29172	0.0211303	0.885815	1.6751	elastin microfibril interfacer 2 [Source:HGNC Symbol;Acc:HGNC:19881]	#	-	ENSOCUG00000002771	403.251	228.221	578.281	2.53386	1.34134	8.50496	0.00942239	0.523374	2.02584	-	#		ENSOCUG00000000061	8.87777	13.6543	4.10128	0.300366	-1.73521	2.90368	0.498587	1	0.302259
VCAN	ENSOCUG00000002613	9003.93	12953	5054.83	0.390243	-1.35755	12.9822	0.00147791	0.135063	2.83035	versican [Source:HGNC Symbol;Acc:HGNC:2464]	#	FBLN7	ENSOCUG00000002898	480.713	226.271	735.155	3.24901	1.7	8.67191	0.00081639	0.085857	3.0881	fibulin 7 [Source:HGNC Symbol;Acc:HGNC:26740]	#		ENSOCUG00000000063	77.8993	80.9503	74.8484	0.924622	-0.113065	6.28243	0.903708	1	0.0439718
NRK	ENSOCUG00000002624	34.2357	64.3701	4.10128	0.0637141	-3.97224	4.0222	0.00320895	0.248143	2.49364	Nik related kinase [Source:HGNC Symbol;Acc:HGNC:25391]	#	-	ENSOCUG00000003316	139.194	49.7405	228.646	4.59678	2.20062	6.73666	0.00130383	0.120988	2.88478	Uncharacterized protein [Source:UniProtKB/TrEMBL;Acc:G1SJG1]	#		ENSOCUG00000000064	194.511	171.654	217.368	1.26632	0.340639	7.59368	0.571124	1	0.24327
EYA2	ENSOCUG00000002658	372.291	515.936	228.646	0.443168	-1.17407	8.42401	0.0244771	0.977426	1.61124	EYA transcriptional coactivator and phosphatase 2 [Source:HGNC Symbol;Acc:HGNC:3520]	#	SELENBP1	ENSOCUG00000003371	471.41	309.172	633.648	2.0495	1.03527	8.7899	0.0385735	1	1.41371	Uncharacterized protein [Source:UniProtKB/TrEMBL;Acc:G1TT06]	#		ENSOCUG00000000065	70.347	95.5799	45.1141	0.472004	-1.08313	6.03707	0.197817	1	0.703736
SDC2	ENSOCUG00000002662	402.251	547.146	257.355	0.47036	-1.08816	8.5517	0.0342592	1	1.46522	syndecan 2 [Source:HGNC Symbol;Acc:HGNC:10659]	#	SPTBN4	ENSOCUG00000003436	568.303	269.184	867.421	3.22241	1.68814	8.91652	0.00066416	0.0727579	3.17773	spectrin, beta, non-erythrocytic 4 [Source:HGNC Symbol;Acc:HGNC:14896]	#		ENSOCUG00000000066	22.9572	24.3826	21.5317	0.883077	-0.179389	4.51809	0.929759	1	0.0316295
AKAP12	ENSOCUG00000002673	588.521	860.219	316.824	0.368306	-1.44102	9.02805	0.00328681	0.252924	2.48323	A kinase (PRKA) anchor protein 12 [Source:HGNC Symbol;Acc:HGNC:370]	#	CCNL1	ENSOCUG00000003451	779.056	507.159	1050.95	2.07224	1.05119	9.51189	0.0253325	0.99905	1.59632	cyclin L1 [Source:HGNC Symbol;Acc:HGNC:20569]	#		ENSOCUG00000000068	446.577	397.924	495.23	1.24453	0.315604	8.79415	0.530253	1	0.275517
FOXM1	ENSOCUG00000002703	114.661	166.777	62.5445	0.375019	-1.41497	6.67429	0.0456593	1	1.34047	forkhead box M1 [Source:HGNC Symbol;Acc:HGNC:3818]	#	SLC22A4	ENSOCUG00000003513	84.1763	36.0863	132.266	3.66528	1.87392	6.11034	0.0192757	0.83495	1.71499	Oryctolagus cuniculus solute carrier family 22 (organic cation/ergothioneine transporter), member 4 (SLC22A4), mRNA. [Source:RefSeq mRNA;Acc:NM_001171346]	#		ENSOCUG00000000069	3793.89	3831	3756.77	0.980626	-0.0282256	11.8894	0.947823	1	0.0232727
CADPS	ENSOCUG00000002826	39.1372	73.1479	5.1266	0.0700855	-3.83474	4.27537	0.00215743	0.184965	2.66606	Ca++-dependent secretion activator [Source:HGNC Symbol;Acc:HGNC:1426]	#	ANK3	ENSOCUG00000003521	472.848	273.085	672.61	2.463	1.30042	8.74342	0.00975752	0.536141	2.01066	ankyrin 3, node of Ranvier (ankyrin G) [Source:HGNC Symbol;Acc:HGNC:494]	#		ENSOCUG00000000070	47.5274	45.8393	49.2154	1.07365	0.102523	5.56978	0.939344	1	0.0271753
CCL5	ENSOCUG00000002848	16.6302	31.2098	2.05064	0.0657051	-3.92785	3	0.0459521	1	1.33769	chemokine (C-C motif) ligand 5 [Source:HGNC Symbol;Acc:HGNC:10632]	#	-	ENSOCUG00000003679	331.616	82.9009	580.331	7.0003	2.80742	7.77702	7.4811e-07	0.00021074	6.12603	Oryctolagus cuniculus glutathione S-transferase alpha I (LOC100328910), mRNA. [Source:RefSeq mRNA;Acc:NM_001171097]	#		ENSOCUG00000000071	145.458	105.333	185.583	1.76187	0.817108	7.12737	0.20797	1	0.682
DUSP6	ENSOCUG00000002902	262.932	422.307	103.557	0.245218	-2.02786	7.70822	0.000420802	0.0518606	3.37592	dual specificity phosphatase 6 [Source:HGNC Symbol;Acc:HGNC:3072]	#	-	ENSOCUG00000003786	15475.2	858.268	30092.1	35.0615	5.13181	12.3112	7.02223e-25	1.23084e-21	24.1535	Uncharacterized protein [Source:UniProtKB/TrEMBL;Acc:G1SKE3]	#		ENSOCUG00000000072	15.7799	24.3826	7.17724	0.294359	-1.76435	3.72561	0.319985	1	0.49487
DLGAP5	ENSOCUG00000002926	55.1923	86.8021	23.5824	0.27168	-1.88002	5.49965	0.0477488	1	1.32104	discs, large (Drosophila) homolog-associated protein 5 [Source:HGNC Symbol;Acc:HGNC:16864]	#	RIMBP2	ENSOCUG00000004542	20.4064	3.90122	36.9115	9.46154	3.24207	3.58496	0.0496517	1	1.30407	RIMS binding protein 2 [Source:HGNC Symbol;Acc:HGNC:30339]	#		ENSOCUG00000000073	787.109	752.935	821.282	1.09077	0.125351	9.61906	0.78982	1	0.102472
CPNE4	ENSOCUG00000002956	50.2157	80.9503	19.4811	0.240655	-2.05496	5.31148	0.0391839	1	1.40689	copine IV [Source:HGNC Symbol;Acc:HGNC:2317]	#	RFT1	ENSOCUG00000004546	118.662	50.7159	186.608	3.67949	1.8795	6.60412	0.00813586	0.473591	2.0896	RFT1 homolog (S. cerevisiae) [Source:HGNC Symbol;Acc:HGNC:30220]	#		ENSOCUG00000000074	531.854	431.085	632.623	1.46751	0.553374	9.02851	0.257703	1	0.588881
LYN	ENSOCUG00000003056	133.029	190.184	75.8737	0.398948	-1.32573	6.90839	0.0489179	1	1.31053	LYN proto-oncogene, Src family tyrosine kinase [Source:HGNC Symbol;Acc:HGNC:6735]	#	AQP2	ENSOCUG00000004635	115.199	45.8393	184.558	4.02619	2.00941	6.52322	0.00531988	0.361499	2.2741	Aquaporin-2 [Source:UniProtKB/Swiss-Prot;Acc:P79213]	#		ENSOCUG00000000075	416.63	426.208	407.052	0.955055	-0.0663445	8.70224	0.900447	1	0.0455419
APLNR	ENSOCUG00000003078	105.195	156.049	54.342	0.348237	-1.52186	6.52492	0.0374251	1	1.42684	apelin receptor [Source:HGNC Symbol;Acc:HGNC:339]	#	CLCA2	ENSOCUG00000004727	289.003	185.308	392.698	2.11916	1.08349	8.07553	0.047476	1	1.32353	chloride channel accessory 2 [Source:HGNC Symbol;Acc:HGNC:2016]	#		ENSOCUG00000000076	464.008	437.912	490.103	1.11918	0.162445	8.85572	0.747263	1	0.126526
ADCY7	ENSOCUG00000003091	337.731	464.245	211.216	0.454967	-1.13617	8.29066	0.0323368	1	1.4903	adenylate cyclase 7 [Source:HGNC Symbol;Acc:HGNC:238]	#	TCHHL1	ENSOCUG00000004732	34.8109	1.95061	67.6712	34.6923	5.11654	3.5222	0.000521694	0.0595175	3.28258	trichohyalin-like 1 [Source:HGNC Symbol;Acc:HGNC:31796]	#		ENSOCUG00000000077	25.6205	20.4814	30.7596	1.50183	0.586723	4.6496	0.673512	1	0.171655
SCUBE2	ENSOCUG00000003165	2572.94	3842.7	1303.18	0.339132	-1.56008	11.1279	0.000402323	0.0503702	3.39542	signal peptide, CUB domain, EGF-like 2 [Source:HGNC Symbol;Acc:HGNC:30425]	#	PHYHD1	ENSOCUG00000004894	73.7606	22.432	125.089	5.57637	2.47933	5.72715	0.004198	0.303778	2.37696	phytanoyl-CoA dioxygenase domain containing 1 [Source:HGNC Symbol;Acc:HGNC:23396]	#		ENSOCUG00000000078	104.22	74.1232	134.317	1.81208	0.857645	6.64068	0.236035	1	0.627023
CCBE1	ENSOCUG00000003209	198.487	296.493	100.481	0.3389	-1.56107	7.43132	0.00982861	0.536141	2.00751	collagen and calcium binding EGF domains 1 [Source:HGNC Symbol;Acc:HGNC:29426]	#	HOP	ENSOCUG00000005107	5075.24	3162.91	6987.56	2.20922	1.14353	12.1988	0.00760421	0.452666	2.11895	Uncharacterized protein [Source:UniProtKB/TrEMBL;Acc:G1SN79]	#		ENSOCUG00000000080	179.894	161.901	197.887	1.22227	0.289567	7.48375	0.638923	1	0.194552
BTC	ENSOCUG00000003214	137.243	205.789	68.6965	0.333819	-1.58286	6.89359	0.018461	0.816394	1.73375	betacellulin [Source:HGNC Symbol;Acc:HGNC:1121]	#	TCHH	ENSOCUG00000005205	1204.3	17.5555	2391.05	136.199	7.08958	7.67864	1.87935e-30	5.92936e-27	29.726	trichohyalin [Source:HGNC Symbol;Acc:HGNC:11791]	#		ENSOCUG00000000081	2280.23	2382.67	2177.78	0.914009	-0.12972	11.1535	0.765278	1	0.116181
SULF1	ENSOCUG00000003246	227.934	327.702	128.165	0.391102	-1.35438	7.67905	0.0196596	0.847349	1.70643	sulfatase 1 [Source:HGNC Symbol;Acc:HGNC:20391]	#	PINLYP	ENSOCUG00000005396	47.3773	11.7037	83.051	7.09615	2.82704	4.96241	0.00777643	0.45945	2.10922	phospholipase A2 inhibitor and LY6/PLAUR domain containing [Source:HGNC Symbol;Acc:HGNC:44206]	#		ENSOCUG00000000083	6.58956	2.92591	10.2532	3.50427	1.80912	2.45345	0.569201	1	0.244734
MRC1	ENSOCUG00000003247	169.415	250.653	88.1776	0.351791	-1.50721	7.21594	0.0167197	0.775744	1.77677	mannose receptor, C type 1 [Source:HGNC Symbol;Acc:HGNC:7228]	#	PRR9	ENSOCUG00000005502	107.996	6.82713	209.165	30.6374	4.93722	5.23989	3.38967e-08	1.24354e-05	7.46984	proline rich 9 [Source:HGNC Symbol;Acc:HGNC:32057]	#		ENSOCUG00000000085	203.651	195.061	212.241	1.08808	0.121781	7.66867	0.843469	1	0.073931
FADS2	ENSOCUG00000003499	356.236	502.282	210.191	0.418471	-1.2568	8.34395	0.0171114	0.786977	1.76671	fatty acid desaturase 2 [Source:HGNC Symbol;Acc:HGNC:3575]	#	PDLIM3	ENSOCUG00000005808	22.457	3.90122	41.0128	10.5128	3.39408	3.66096	0.0324249	1	1.48912	PDZ and LIM domain 3 [Source:HGNC Symbol;Acc:HGNC:20767]	#		ENSOCUG00000000086	938.093	922.638	953.548	1.0335	0.0475403	9.87339	0.919625	1	0.0363893
LIF	ENSOCUG00000003768	177.38	279.912	74.8484	0.267399	-1.90293	7.17737	0.00255344	0.209795	2.59287	leukemia inhibitory factor [Source:HGNC Symbol;Acc:HGNC:6596]	#	LTBP4	ENSOCUG00000005827	648.378	265.283	1031.47	3.8882	1.9591	9.03094	6.93329e-05	0.0115129	4.15906	latent transforming growth factor beta binding protein 4 [Source:HGNC Symbol;Acc:HGNC:6717]	#		ENSOCUG00000000090	777.581	804.626	750.535	0.932774	-0.100401	9.60198	0.831802	1	0.07998
THBS1	ENSOCUG00000003792	3522.83	4765.34	2280.31	0.478521	-1.06335	11.6867	0.0136772	0.672144	1.864	thrombospondin 1 [Source:HGNC Symbol;Acc:HGNC:11785]	#	SLC2A1	ENSOCUG00000005924	2204.94	940.194	3469.68	3.69039	1.88377	10.8187	2.60965e-05	0.0048432	4.58342	Oryctolagus cuniculus solute carrier family 2 (facilitated glucose transporter), member 1 (SLC2A1), mRNA. [Source:RefSeq mRNA;Acc:NM_001105687]	#		ENSOCUG00000000091	5.51422	4.87652	6.15192	1.26154	0.335184	2.45345	0.979971	1	0.00878673
FBN1	ENSOCUG00000003866	6639.61	8951.35	4327.88	0.483489	-1.04845	12.6037	0.0137821	0.675196	1.86068	fibrillin 1 [Source:HGNC Symbol;Acc:HGNC:3603]	#	-	ENSOCUG00000005933	81.438	2.92591	159.95	54.6667	5.77259	4.43518	7.57798e-08	2.54346e-05	7.12045	Uncharacterized protein [Source:UniProtKB/TrEMBL;Acc:G1SPZ4]	#		ENSOCUG00000000092	16255.1	13609.4	18900.8	1.3888	0.47384	13.9692	0.257526	1	0.589179
CD163	ENSOCUG00000003958	301.982	438.887	165.077	0.376125	-1.41071	8.07235	0.0098298	0.536141	2.00746	CD163 molecule [Source:HGNC Symbol;Acc:HGNC:1631]	#	FAM180B	ENSOCUG00000006361	531.304	332.579	730.028	2.19505	1.13426	8.94468	0.021381	0.89229	1.66997	family with sequence similarity 180, member B [Source:HGNC Symbol;Acc:HGNC:34451]	#		ENSOCUG00000000093	103.845	88.7527	118.937	1.3401	0.422336	6.68289	0.563921	1	0.248782
GLIS3	ENSOCUG00000004030	155.336	239.925	70.7471	0.294872	-1.76184	7.02552	0.00683136	0.422533	2.16549	GLIS family zinc finger 3 [Source:HGNC Symbol;Acc:HGNC:28510]	#	C1QTNF4	ENSOCUG00000006365	107.359	51.6912	163.026	3.15385	1.65711	6.5204	0.0229067	0.935384	1.64004	C1q and tumor necrosis factor related protein 4 [Source:HGNC Symbol;Acc:HGNC:14346]	#		ENSOCUG00000000094	53.5292	51.6912	55.3673	1.07112	0.0991168	5.7414	0.936299	1	0.0285853
FNDC3B	ENSOCUG00000004185	372.016	526.665	217.368	0.412726	-1.27675	8.40237	0.0146913	0.70873	1.83294	fibronectin type III domain containing 3B [Source:HGNC Symbol;Acc:HGNC:24670]	#	FAM46B	ENSOCUG00000006426	966.54	592.985	1340.09	2.25991	1.17627	9.79999	0.0108729	0.575572	1.96365	family with sequence similarity 46, member B [Source:HGNC Symbol;Acc:HGNC:28273]	#		ENSOCUG00000000095	112.248	120.938	103.557	0.856286	-0.223835	6.8062	0.759475	1	0.119487
PRSS35	ENSOCUG00000004205	1302.02	2024.73	579.306	0.286115	-1.80533	10.0808	8.60059e-05	0.0137045	4.06547	protease, serine, 35 [Source:HGNC Symbol;Acc:HGNC:21387]	#	CD109	ENSOCUG00000006444	662.457	435.961	888.953	2.03906	1.02791	9.28201	0.0316083	1	1.5002	CD109 molecule [Source:HGNC Symbol;Acc:HGNC:21685]	#		ENSOCUG00000000097	491.941	508.134	475.749	0.936267	-0.0950088	8.94156	0.851018	1	0.070061
TYRP1	ENSOCUG00000004221	427.071	598.837	255.305	0.426334	-1.22994	8.61105	0.0160022	0.751293	1.79582	TRP-1; Uncharacterized protein [Source:UniProtKB/TrEMBL;Acc:G1SLB6]	#	SCAMP5	ENSOCUG00000006573	63.4823	23.4073	103.557	4.42415	2.1454	5.62159	0.0176712	0.803352	1.75273	secretory carrier membrane protein 5 [Source:HGNC Symbol;Acc:HGNC:30386]	#		ENSOCUG00000000098	12.879	17.5555	8.20256	0.467236	-1.09778	3.58496	0.58812	1	0.230534
CCNB1	ENSOCUG00000004340	115.561	171.654	59.4686	0.346445	-1.5293	6.65871	0.0309055	1	1.50996	cyclin B1 [Source:HGNC Symbol;Acc:HGNC:1579]	#	CES1	ENSOCUG00000006737	338.343	100.456	576.23	5.73612	2.52008	7.91046	6.10343e-06	0.00137545	5.21443	carboxylesterase 1 [Source:HGNC Symbol;Acc:HGNC:1863]	#		ENSOCUG00000000100	754.573	742.207	766.94	1.03332	0.0472916	9.55932	0.922309	1	0.0351234
BTG2	ENSOCUG00000004422	252.741	399.875	105.608	0.264103	-1.92083	7.68299	0.000883318	0.0904827	3.05388	BTG family, member 2 [Source:HGNC Symbol;Acc:HGNC:1131]	#	-	ENSOCUG00000006826	479.45	55.5924	903.307	16.2488	4.02226	7.80794	1.58712e-12	1.13804e-09	11.7994	Uncharacterized protein [Source:UniProtKB/TrEMBL;Acc:G1U2D5]	#		ENSOCUG00000000101	12.2913	20.4814	4.10128	0.200244	-2.32017	3.19616	0.269805	1	0.56895
-	ENSOCUG00000004424	359.487	495.455	223.52	0.451141	-1.14835	8.37843	0.0286869	1	1.54232	Uncharacterized protein [Source:UniProtKB/TrEMBL;Acc:G1SLS7]	#	CALML4	ENSOCUG00000006974	181.619	54.6171	308.621	5.65064	2.49841	7.02049	0.000101571	0.0155562	3.99323	calmodulin-like 4 [Source:HGNC Symbol;Acc:HGNC:18445]	#		ENSOCUG00000000102	56.3926	39.9875	72.7978	1.82051	0.864345	5.75365	0.348017	1	0.4584
BNC2	ENSOCUG00000004460	234.236	321.851	146.621	0.455556	-1.1343	7.7631	0.0480398	1	1.3184	basonuclin 2 [Source:HGNC Symbol;Acc:HGNC:30988]	#	-	ENSOCUG00000006985	16.8678	1.95061	31.7849	16.2949	4.02635	2.9771	0.0395927	1	1.40238	Uncharacterized protein [Source:UniProtKB/TrEMBL;Acc:G1SS53]	#		ENSOCUG00000000103	85.0391	102.407	67.6712	0.660806	-0.597702	6.37932	0.44528	1	0.351367
COL27A1	ENSOCUG00000004590	1546.4	2091.05	1001.74	0.479059	-1.06172	10.4992	0.0172294	0.787809	1.76373	collagen, type XXVII, alpha 1 [Source:HGNC Symbol;Acc:HGNC:22986]	#	TNX	ENSOCUG00000007056	665.32	384.27	946.371	2.46277	1.30028	9.23612	0.00685696	0.422533	2.16387	Uncharacterized protein [Source:UniProtKB/TrEMBL;Acc:G1SSA8]	#		ENSOCUG00000000105	601.876	579.331	624.42	1.07783	0.108129	9.23231	0.824692	1	0.0837085
FST	ENSOCUG00000004687	121.801	188.234	55.3673	0.294141	-1.76542	6.67367	0.0119259	0.602557	1.92351	follistatin [Source:HGNC Symbol;Acc:HGNC:3971]	#	FGFR2	ENSOCUG00000007069	2143.98	1418.09	2869.87	2.02375	1.01703	10.9783	0.0202836	0.867509	1.69285	fibroblast growth factor receptor 2 [Source:RefSeq peptide;Acc:NP_001076157]	#		ENSOCUG00000000107	110.497	109.234	111.76	1.02312	0.0329792	6.78777	0.977024	1	0.0100948
TNFAIP8L2	ENSOCUG00000004719	60.9941	100.456	21.5317	0.214339	-2.22203	5.53941	0.0162607	0.761167	1.78886	Oryctolagus cuniculus tumor necrosis factor, alpha-induced protein 8-like 2 (TNFAIP8L2), mRNA. [Source:RefSeq mRNA;Acc:NM_001171296]	#	C1orf167	ENSOCUG00000007278	71.0972	26.3332	115.861	4.39981	2.13744	5.78753	0.0133527	0.658244	1.87443	chromosome 1 open reading frame 167 [Source:HGNC Symbol;Acc:HGNC:25262]	#		ENSOCUG00000000108	56.5177	75.0985	37.9369	0.505162	-0.985183	5.73812	0.284591	1	0.545779
NKAIN1	ENSOCUG00000004783	29.4342	51.6912	7.17724	0.138849	-2.84842	4.26764	0.032881	1	1.48306	Na+/K+ transporting ATPase interacting 1 [Source:HGNC Symbol;Acc:HGNC:25743]	#	CILP	ENSOCUG00000007302	770.916	364.764	1177.07	3.22693	1.69016	9.3559	0.000412661	0.0512576	3.38441	cartilage intermediate layer protein, nucleotide pyrophosphohydrolase [Source:HGNC Symbol;Acc:HGNC:1980]	#		ENSOCUG00000000111	39.975	60.4689	19.4811	0.322167	-1.63412	5.10106	0.132697	1	0.877138
SLC40A1	ENSOCUG00000004826	376.393	515.936	236.849	0.459066	-1.12323	8.44944	0.0308699	1	1.51046	solute carrier family 40 (iron-regulated transporter), member 1 [Source:HGNC Symbol;Acc:HGNC:10909]	#	BAMBI	ENSOCUG00000007403	80.1501	33.1604	127.14	3.83409	1.93888	6.02083	0.0177427	0.804283	1.75098	BMP and activin membrane-bound inhibitor [Source:HGNC Symbol;Acc:HGNC:30251]	#		ENSOCUG00000000114	29.6968	21.4567	37.9369	1.76807	0.822172	4.83444	0.512272	1	0.290499
GAP43	ENSOCUG00000004847	413.192	580.306	246.077	0.424047	-1.23771	8.56182	0.0159279	0.750039	1.79784	growth associated protein 43 [Source:HGNC Symbol;Acc:HGNC:4140]	#	GPR56	ENSOCUG00000007622	1344.1	883.626	1804.56	2.04223	1.03014	10.3024	0.0218422	0.901666	1.6607	G protein-coupled receptor 56 [Source:HGNC Symbol;Acc:HGNC:4512]	#		ENSOCUG00000000116	66.6583	59.4936	73.8231	1.24086	0.311337	6.05033	0.726789	1	0.138591
NUAK1	ENSOCUG00000004958	534.142	721.726	346.558	0.48018	-1.05835	8.96613	0.0314444	1	1.50246	NUAK family, SNF1-like kinase, 1 [Source:HGNC Symbol;Acc:HGNC:14311]	#	CST3	ENSOCUG00000008071	7673.99	4599.54	10748.4	2.33685	1.22457	12.7796	0.00408549	0.296998	2.38876	Oryctolagus cuniculus cystatin C (CST3), mRNA. [Source:RefSeq mRNA;Acc:NM_001082706]	#		ENSOCUG00000000119	3.56361	0.975305	6.15192	6.30769	2.65711	1.29248	0.628172	1	0.201922
INHBB	ENSOCUG00000005094	120.813	206.765	34.8609	0.168602	-2.56831	6.40769	0.000438173	0.0527647	3.35835	inhibin, beta B [Source:HGNC Symbol;Acc:HGNC:6067]	#	LYPD6B	ENSOCUG00000008346	252.654	143.37	361.938	2.52451	1.336	7.8316	0.0182814	0.812364	1.73799	LY6/PLAUR domain containing 6B [Source:HGNC Symbol;Acc:HGNC:27018]	#		ENSOCUG00000000120	37.4992	37.0616	37.9369	1.02362	0.0336756	5.22869	1	1	0
MKI67	ENSOCUG00000005133	603.314	823.157	383.47	0.465852	-1.10205	9.134	0.0229473	0.935384	1.63927	marker of proliferation Ki-67 [Source:HGNC Symbol;Acc:HGNC:7107]	#	EGLN3	ENSOCUG00000008560	1627.33	713.923	2540.74	3.55885	1.83141	10.3953	5.44023e-05	0.00922792	4.26438	egl-9 family hypoxia-inducible factor 3 [Source:HGNC Symbol;Acc:HGNC:14661]	#		ENSOCUG00000000121	15.0047	14.6296	15.3798	1.05128	0.0721498	3.90689	1	1	0
-	ENSOCUG00000005244	56.6177	111.185	2.05064	0.0184435	-5.76074	3.91645	4.73477e-06	0.00111479	5.3247	-	#	S100A9	ENSOCUG00000008632	4797.14	1392.74	8201.54	5.8888	2.55797	11.7227	1.19868e-08	4.7273e-06	7.9213	S100 calcium binding protein A9 [Source:HGNC Symbol;Acc:HGNC:10499]	#		ENSOCUG00000000122	316.912	336.48	297.343	0.883686	-0.178394	8.30518	0.74175	1	0.129742
TGFB2	ENSOCUG00000005279	67.5836	103.382	31.7849	0.30745	-1.70157	5.84106	0.0498608	1	1.30224	Oryctolagus cuniculus transforming growth factor, beta 2 (TGFB2), mRNA. [Source:RefSeq mRNA;Acc:NM_001082660]	#	S100A3	ENSOCUG00000008647	78.8872	22.432	135.342	6.03344	2.59298	5.78398	0.00225843	0.188644	2.64619	S100 calcium binding protein A3 [Source:HGNC Symbol;Acc:HGNC:10493]	#		ENSOCUG00000000123	83.5761	99.4811	67.6712	0.680241	-0.555881	6.35841	0.481415	1	0.31748
THBS2	ENSOCUG00000005371	17745.4	24945.4	10545.4	0.422741	-1.24216	13.9854	0.0033619	0.257447	2.47341	thrombospondin 2 [Source:HGNC Symbol;Acc:HGNC:11786]	#	OGN	ENSOCUG00000009017	215.117	127.765	302.47	2.36739	1.2433	7.619	0.0340782	1	1.46752	Oryctolagus cuniculus osteoglycin (OGN), mRNA. [Source:RefSeq mRNA;Acc:NM_001082116]	#		ENSOCUG00000000125	126.064	121.913	130.216	1.0681	0.0950502	6.97723	0.899737	1	0.0458843
IRGQ	ENSOCUG00000005402	218.181	308.196	128.165	0.415855	-1.26585	7.63478	0.0305974	1	1.51432	immunity-related GTPase family, Q [Source:HGNC Symbol;Acc:HGNC:24868]	#	PDILT	ENSOCUG00000009056	298.656	48.7652	548.546	11.2487	3.49169	7.35363	6.65796e-09	2.83863e-06	8.17666	protein disulfide isomerase-like, testis expressed [Source:HGNC Symbol;Acc:HGNC:27338]	#		ENSOCUG00000000127	189.034	185.308	192.76	1.04022	0.056883	7.56222	0.93367	1	0.0298068
CD1C	ENSOCUG00000005421	36.2863	64.3701	8.20256	0.127428	-2.97224	4.5222	0.0144853	0.700939	1.83907	Oryctolagus cuniculus CD1c molecule (CD1C), mRNA. [Source:RefSeq mRNA;Acc:NM_001082689]	#	SERPINB8P1	ENSOCUG00000009148	126.027	23.4073	228.646	9.76816	3.28809	6.19293	1.16176e-05	0.00241141	4.93488	Oryctolagus cuniculus serpin peptidase inhibitor, clade B8 (ovalbumin) pseudogene 1 (SERPINB8P1), mRNA. [Source:RefSeq mRNA;Acc:NM_001171285]	#		ENSOCUG00000000128	49.0903	44.864	53.3167	1.18841	0.249028	5.612	0.814605	1	0.0890531
-	ENSOCUG00000005527	78.9497	119.962	37.9369	0.316239	-1.66091	6.07598	0.0416294	1	1.3806	Uncharacterized protein [Source:UniProtKB/TrEMBL;Acc:G1SP45]	#	CYP27C1	ENSOCUG00000009153	1528.68	922.638	2134.72	2.31371	1.21021	10.4547	0.00683548	0.422533	2.16523	cytochrome P450, family 27, subfamily C, polypeptide 1 [Source:HGNC Symbol;Acc:HGNC:33480]	#		ENSOCUG00000000129	1227.67	1045.53	1409.82	1.34843	0.431276	10.2457	0.336428	1	0.473108
STC1	ENSOCUG00000005708	91.341	136.543	46.1394	0.337912	-1.56528	6.31057	0.0420106	1	1.37664	stanniocalcin 1 [Source:HGNC Symbol;Acc:HGNC:11373]	#	PADI3	ENSOCUG00000009215	36.7115	7.80244	65.6205	8.41026	3.07215	4.5	0.01128	0.589214	1.94769	peptidyl arginine deiminase, type III [Source:HGNC Symbol;Acc:HGNC:18337]	#		ENSOCUG00000000131	145.983	164.827	127.14	0.771355	-0.374533	7.17754	0.566694	1	0.246652
ADRA1B	ENSOCUG00000005721	45.7018	77.0491	14.3545	0.186303	-2.42428	5.05557	0.0219161	0.901666	1.65924	Oryctolagus cuniculus adrenergic, alpha-1B-, receptor (ADRA1B), mRNA. [Source:RefSeq mRNA;Acc:NM_001082062]	#	CRLS1	ENSOCUG00000009328	165.677	96.5552	234.798	2.43175	1.282	7.23428	0.041629	1	1.3806	cardiolipin synthase 1 [Source:HGNC Symbol;Acc:HGNC:16148]	#		ENSOCUG00000000133	550.81	691.491	410.128	0.593107	-0.753636	9.05675	0.122093	1	0.91331
IGSF10	ENSOCUG00000005885	1342.62	1980.84	704.395	0.355604	-1.49166	10.2061	0.00102753	0.101945	2.98821	immunoglobulin superfamily, member 10 [Source:HGNC Symbol;Acc:HGNC:26384]	#	CNTN1	ENSOCUG00000009395	634.211	397.924	870.497	2.18759	1.12935	9.20102	0.019058	0.832637	1.71992	contactin 1 [Source:HGNC Symbol;Acc:HGNC:2171]	#		ENSOCUG00000000134	64.2201	54.6171	73.8231	1.35165	0.43472	5.98864	0.624533	1	0.204445
PDPN	ENSOCUG00000005899	1352.29	1903.8	800.775	0.420621	-1.24941	10.27	0.0056315	0.370154	2.24938	podoplanin [Source:HGNC Symbol;Acc:HGNC:29602]	#	C17orf64	ENSOCUG00000009414	160.238	88.7527	231.722	2.61088	1.38453	7.16399	0.029737	1	1.5267	chromosome 17 open reading frame 64 [Source:HGNC Symbol;Acc:HGNC:26990]	#		ENSOCUG00000000137	1706.37	1770.18	1642.56	0.927908	-0.107946	10.7357	0.806832	1	0.0932166
WDR72	ENSOCUG00000006258	22.0194	40.9628	3.07596	0.0750916	-3.73521	3.48864	0.0240994	0.967349	1.61799	WD repeat domain 72 [Source:HGNC Symbol;Acc:HGNC:26790]	#	CNGA2	ENSOCUG00000009436	66.4458	7.80244	125.089	16.0321	4.00289	4.96537	6.14049e-05	0.0103049	4.2118	Oryctolagus cuniculus aorta CNG channel (rACNG) (RACNG), mRNA. [Source:RefSeq mRNA;Acc:NM_001082394]	#		ENSOCUG00000000140	644.476	657.355	631.597	0.960816	-0.0576685	9.3317	0.9068	1	0.0424883
-	ENSOCUG00000006321	3999.83	5556.31	2443.34	0.439741	-1.18527	11.8473	0.0059599	0.383278	2.22476	Uncharacterized protein [Source:UniProtKB/TrEMBL;Acc:G1SQR6]	#	S100A8	ENSOCUG00000009566	3531.74	1398.59	5664.9	4.05044	2.01808	11.4588	5.20068e-06	0.00120648	5.28394	S100 calcium binding protein A8 [Source:HGNC Symbol;Acc:HGNC:10498]	#		ENSOCUG00000000141	43.151	56.5677	29.7343	0.525641	-0.92785	5.35798	0.37228	1	0.42913
ADAMTS12	ENSOCUG00000006357	545.383	743.182	347.584	0.467696	-1.09636	8.98939	0.0255331	1	1.5929	ADAM metallopeptidase with thrombospondin type 1 motif, 12 [Source:HGNC Symbol;Acc:HGNC:14605]	#	TUBE1	ENSOCUG00000009644	367.502	82.9009	652.104	7.86606	2.97564	7.86114	1.14668e-07	3.69162e-05	6.94056	tubulin, epsilon 1 [Source:HGNC Symbol;Acc:HGNC:20775]	#		ENSOCUG00000000142	2.48828	2.92591	2.05064	0.700855	-0.512813	1.29248	1	1	0
-	ENSOCUG00000006462	328.315	651.504	5.1266	0.00786888	-6.98963	5.85282	1.09332e-19	1.43726e-16	18.9613	Uncharacterized protein [Source:UniProtKB/TrEMBL;Acc:G1SR31]	#	THEM5	ENSOCUG00000009679	372.041	125.814	618.268	4.91413	2.29694	8.12362	2.25244e-05	0.00433321	4.64735	thioesterase superfamily member 5 [Source:HGNC Symbol;Acc:HGNC:26755]	#		ENSOCUG00000000143	2.53829	0.975305	4.10128	4.20513	2.07215	1	0.795789	1	0.0992023
TNF	ENSOCUG00000006698	47.5774	83.8762	11.2785	0.134466	-2.89468	4.94285	0.00672672	0.421087	2.1722	Oryctolagus cuniculus tumor necrosis factor (TNF), mRNA. [Source:RefSeq mRNA;Acc:NM_001082263]	#	BZRAP1	ENSOCUG00000009705	371.929	230.172	513.686	2.23175	1.15817	8.42565	0.0263764	1	1.57879	benzodiazepine receptor (peripheral) associated protein 1 [Source:HGNC Symbol;Acc:HGNC:16831]	#		ENSOCUG00000000144	11.0535	8.77774	13.3292	1.51852	0.602665	3.43518	0.807903	1	0.0926409
BDNF	ENSOCUG00000006731	93.2416	142.395	44.0888	0.309624	-1.69141	6.30804	0.027505	1	1.56059	brain-derived neurotrophic factor [Source:HGNC Symbol;Acc:HGNC:1033]	#	LAMA3	ENSOCUG00000009869	942.932	553.973	1331.89	2.40425	1.26559	9.74647	0.0063611	0.399786	2.19647	laminin, alpha 3 [Source:HGNC Symbol;Acc:HGNC:6483]	#		ENSOCUG00000000146	3758.22	3782.23	3734.22	0.987305	-0.0184321	11.8758	0.966176	1	0.0149439
MEST	ENSOCUG00000006752	69.3092	116.061	22.5571	0.194355	-2.36324	5.67712	0.00752647	0.449735	2.12341	mesoderm specific transcript [Source:HGNC Symbol;Acc:HGNC:7028]	#	DYRK2	ENSOCUG00000009934	350.972	207.74	494.204	2.37896	1.25033	8.3238	0.0179201	0.805382	1.74666	dual-specificity tyrosine-(Y)-phosphorylation regulated kinase 2 [Source:HGNC Symbol;Acc:HGNC:3093]	#		ENSOCUG00000000149	945.408	1137.21	753.611	0.662686	-0.593602	9.85448	0.195464	1	0.708933
LMO7	ENSOCUG00000006793	820.882	1095.27	546.496	0.498961	-1.003	9.59557	0.0318343	1	1.4971	LIM domain 7 [Source:HGNC Symbol;Acc:HGNC:6646]	#	DACT2	ENSOCUG00000009993	124.664	16.5802	232.748	14.0377	3.81124	5.95701	1.01469e-06	0.000275977	5.99367	dishevelled-binding antagonist of beta-catenin 2 [Source:HGNC Symbol;Acc:HGNC:21231]	#		ENSOCUG00000000151	1.00031	0.975305	1.02532	1.05128	0.0721498	1.28137e-15	1	1	0
C2	ENSOCUG00000006999	379.881	519.837	239.925	0.461538	-1.11548	8.46418	0.0317384	1	1.49841	complement component 2 [Source:HGNC Symbol;Acc:HGNC:1248]	#	GJB2	ENSOCUG00000010156	381.982	237.974	525.989	2.21028	1.14423	8.46678	0.0274639	1	1.56124	gap junction protein, beta 2, 26kDa [Source:HGNC Symbol;Acc:HGNC:4284]	#		ENSOCUG00000000152	469.959	565.677	374.242	0.661583	-0.596007	8.84583	0.231399	1	0.635638
MARCKS	ENSOCUG00000007028	856.068	1202.55	509.584	0.423753	-1.23871	9.61253	0.00809364	0.472879	2.09186	myristoylated alanine-rich protein kinase C substrate [Source:HGNC Symbol;Acc:HGNC:6759]	#	TAS1R2	ENSOCUG00000010652	40.3001	7.80244	72.7978	9.33013	3.2219	4.57487	0.00600125	0.383278	2.22176	taste receptor, type 1, member 2 [Source:HGNC Symbol;Acc:HGNC:14905]	#		ENSOCUG00000000153	368.065	320.875	415.255	1.29413	0.371984	8.51186	0.473825	1	0.324382
PENK	ENSOCUG00000007052	1379.23	2192.49	565.977	0.258144	-1.95375	10.1215	2.19258e-05	0.00427012	4.65904	proenkephalin [Source:HGNC Symbol;Acc:HGNC:8831]	#	CHAC1	ENSOCUG00000010762	45.2016	16.5802	73.8231	4.45249	2.15461	5.12869	0.0394179	1	1.40431	ChaC glutathione-specific gamma-glutamylcyclotransferase 1 [Source:HGNC Symbol;Acc:HGNC:28680]	#		ENSOCUG00000000155	175.517	212.616	138.418	0.651023	-0.619219	7.4225	0.313745	1	0.503423
TENM3	ENSOCUG00000007616	1002.6	1385.91	619.294	0.44685	-1.16214	9.85555	0.0115972	0.59398	1.93565	teneurin transmembrane protein 3 [Source:HGNC Symbol;Acc:HGNC:29944]	#	BMP4	ENSOCUG00000011097	296.73	163.851	429.609	2.62195	1.39064	8.05156	0.0111134	0.583552	1.95415	bone morphogenetic protein 4 [Source:HGNC Symbol;Acc:HGNC:1071]	#		ENSOCUG00000000156	568.74	671.985	465.495	0.692717	-0.529662	9.12745	0.27434	1	0.561711
CYP26B1	ENSOCUG00000007620	855.48	1165.49	545.47	0.468018	-1.09536	9.63904	0.0188164	0.824524	1.72546	cytochrome P450, family 26, subfamily B, polypeptide 1 [Source:HGNC Symbol;Acc:HGNC:20581]	#	EXOSC5	ENSOCUG00000011497	175.88	98.5058	253.254	2.57096	1.36231	7.30329	0.0280463	1	1.55212	exosome component 5 [Source:HGNC Symbol;Acc:HGNC:24662]	#		ENSOCUG00000000157	61.6568	54.6171	68.6965	1.25778	0.330884	5.93672	0.719062	1	0.143234
ANGPTL2	ENSOCUG00000007685	7072.27	9712.09	4432.46	0.456386	-1.13167	12.6797	0.00790285	0.465177	2.10222	angiopoietin-like 2 [Source:HGNC Symbol;Acc:HGNC:490]	#	SLC35E4	ENSOCUG00000011606	288.978	186.283	391.672	2.10256	1.07215	8.07743	0.0498	1	1.30277	solute carrier family 35, member E4 [Source:HGNC Symbol;Acc:HGNC:17058]	#		ENSOCUG00000000158	2498.96	2309.52	2688.39	1.16405	0.219148	11.283	0.612072	1	0.213197
C1orf162	ENSOCUG00000007816	86.7021	137.518	35.8862	0.260957	-1.93812	6.13442	0.0148367	0.713564	1.82866	chromosome 1 open reading frame 162 [Source:HGNC Symbol;Acc:HGNC:28344]	#	KRT16	ENSOCUG00000011781	23094.1	1806.26	44382	24.5712	4.61889	13.1282	1.57271e-21	2.48096e-18	20.8034	keratin 16 [Source:HGNC Symbol;Acc:HGNC:6423]	#		ENSOCUG00000000159	881.601	646.627	1116.57	1.72677	0.788073	9.73083	0.0882958	1	1.05406
NRP2	ENSOCUG00000007978	814.405	1107.95	520.863	0.470116	-1.08891	9.56922	0.0200982	0.863895	1.69684	neuropilin 2 [Source:HGNC Symbol;Acc:HGNC:8005]	#	-	ENSOCUG00000011793	177.756	105.333	250.178	2.37512	1.248	7.34281	0.0429715	1	1.36682	Uncharacterized protein [Source:UniProtKB/TrEMBL;Acc:G1T200]	#		ENSOCUG00000000161	357.987	354.036	361.938	1.02232	0.0318484	8.48368	0.956968	1	0.0191026
DUSP1	ENSOCUG00000007999	3024.67	4119.69	1929.65	0.468398	-1.09419	11.4612	0.0115879	0.59398	1.93599	dual specificity phosphatase 1 [Source:HGNC Symbol;Acc:HGNC:3064]	#	CRNN	ENSOCUG00000011842	92.9415	34.1357	151.747	4.44542	2.15232	6.16937	0.00588292	0.38034	2.23041	cornulin [Source:HGNC Symbol;Acc:HGNC:1230]	#		ENSOCUG00000000162	27.271	36.0863	18.4558	0.511435	-0.967379	4.68969	0.459333	1	0.337873
CD274	ENSOCUG00000008117	44.2638	73.1479	15.3798	0.210256	-2.24978	5.06785	0.0343876	1	1.4636	CD274 molecule [Source:HGNC Symbol;Acc:HGNC:17635]	#	TPD52L1	ENSOCUG00000011858	218.931	78.9997	358.862	4.54258	2.18351	7.39553	0.000296438	0.0374104	3.52807	tumor protein D52-like 1 [Source:HGNC Symbol;Acc:HGNC:12006]	#		ENSOCUG00000000163	752.435	685.639	819.231	1.19484	0.256821	9.54972	0.584193	1	0.233443
CALD1	ENSOCUG00000008127	1411.94	1956.46	867.421	0.443362	-1.17344	10.3473	0.00900425	0.510943	2.04555	Oryctolagus cuniculus caldesmon 1 (CALD1), mRNA. [Source:RefSeq mRNA;Acc:NM_001082256]	#	CACNA1A	ENSOCUG00000011985	257.918	157.999	357.837	2.2648	1.17938	7.89347	0.035652	1	1.44792	calcium channel, voltage-dependent, P/Q type, alpha 1A subunit [Source:HGNC Symbol;Acc:HGNC:1388]	#		ENSOCUG00000000164	850.728	870.947	830.51	0.953571	-0.0685885	9.73215	0.884367	1	0.0533673
KIF26B	ENSOCUG00000008220	587.384	884.601	290.166	0.328019	-1.60815	8.98481	0.0011012	0.105354	2.95813	kinesin family member 26B [Source:HGNC Symbol;Acc:HGNC:25484]	#	EML6	ENSOCUG00000012044	401.525	175.555	627.496	3.57436	1.83768	8.37462	0.000465832	0.0552519	3.33177	echinoderm microtubule associated protein like 6 [Source:HGNC Symbol;Acc:HGNC:35412]	#		ENSOCUG00000000165	14.342	20.4814	8.20256	0.400488	-1.32017	3.69616	0.481545	1	0.317363
SMYD3	ENSOCUG00000008229	392.523	606.64	178.406	0.294089	-1.76568	8.36186	0.000791681	0.0843836	3.10145	SET and MYND domain containing 3 [Source:HGNC Symbol;Acc:HGNC:15513]	#	PPIA	ENSOCUG00000012631	954.561	260.406	1648.72	6.33132	2.66251	9.35587	4.53295e-08	1.58905e-05	7.34362	Oryctolagus cuniculus peptidylprolyl isomerase A (cyclophilin A) (PPIA), mRNA. [Source:RefSeq mRNA;Acc:NM_001082057]	#		ENSOCUG00000000166	37.1116	32.1851	42.0381	1.30614	0.385308	5.20097	0.743316	1	0.128827
EGR-1	ENSOCUG00000008439	2858.28	4150.9	1565.66	0.377187	-1.40665	11.3159	0.00130141	0.120988	2.88558	Uncharacterized protein [Source:UniProtKB/TrEMBL;Acc:G1SV58]	#	CRYAB	ENSOCUG00000012972	107.921	49.7405	166.102	3.33937	1.73957	6.50614	0.0170535	0.786607	1.76819	Oryctolagus cuniculus crystallin, alpha B (CRYAB), mRNA. [Source:RefSeq mRNA;Acc:NM_001082407]	#		ENSOCUG00000000167	1234.66	1272.77	1196.55	0.940112	-0.0890955	10.2692	0.843873	1	0.073723
VASH2	ENSOCUG00000008579	246.927	406.702	87.1522	0.21429	-2.22236	7.55665	0.000157636	0.0226064	3.80235	vasohibin 2 [Source:HGNC Symbol;Acc:HGNC:25723]	#	EXOSC10	ENSOCUG00000013039	1656.14	710.022	2602.26	3.66505	1.87383	10.4086	3.6682e-05	0.00657567	4.43555	exosome component 10 [Source:HGNC Symbol;Acc:HGNC:9138]	#		ENSOCUG00000000170	79.875	83.8762	75.8737	0.904592	-0.144662	6.31786	0.870145	1	0.0604083
KCNK2	ENSOCUG00000008629	113.723	183.357	44.0888	0.240453	-2.05617	6.49043	0.00466608	0.330538	2.33105	potassium channel, two pore domain subfamily K, member 2 [Source:HGNC Symbol;Acc:HGNC:6277]	#	KRT32	ENSOCUG00000013079	202.901	64.3701	341.432	5.3042	2.40713	7.21189	0.000107288	0.0162737	3.96945	keratin 32 [Source:HGNC Symbol;Acc:HGNC:6449]	#		ENSOCUG00000000171	27.071	43.8887	10.2532	0.233618	-2.09778	4.40689	0.116546	1	0.933501
ITM2A	ENSOCUG00000008651	761.713	1203.53	319.9	0.265802	-1.91157	9.27726	7.56524e-05	0.0124314	4.12118	integral membrane protein 2A [Source:HGNC Symbol;Acc:HGNC:6173]	#	KRT35	ENSOCUG00000013084	110.66	2.92591	218.393	74.641	6.2219	4.65984	4.0781e-10	2.21835e-07	9.38954	keratin 35 [Source:HGNC Symbol;Acc:HGNC:6453]	#		ENSOCUG00000000172	257.355	239.925	274.786	1.1453	0.195724	8.0043	0.729759	1	0.13682
ADAM12	ENSOCUG00000008781	2281.09	3568.64	993.536	0.278407	-1.84473	10.8788	3.654e-05	0.00657567	4.43723	ADAM metallopeptidase domain 12 [Source:HGNC Symbol;Acc:HGNC:190]	#	DLL1	ENSOCUG00000013290	377.681	245.777	509.584	2.07336	1.05197	8.46719	0.0426689	1	1.36989	delta-like 1 (Drosophila) [Source:HGNC Symbol;Acc:HGNC:2908]	#		ENSOCUG00000000173	100.331	125.814	74.8484	0.594912	-0.749253	6.60053	0.307565	1	0.512063
CORIN	ENSOCUG00000008858	200.775	347.209	54.342	0.156511	-2.67566	7.10183	2.34289e-05	0.00439989	4.63025	corin, serine peptidase [Source:HGNC Symbol;Acc:HGNC:19012]	#	SNCG	ENSOCUG00000013292	88.4026	31.2098	145.596	4.66506	2.2219	6.07487	0.00538524	0.361499	2.26879	synuclein, gamma (breast cancer-specific protein 1) [Source:HGNC Symbol;Acc:HGNC:11141]	#		ENSOCUG00000000174	50.6783	42.9134	58.4433	1.36189	0.445608	5.64616	0.652513	1	0.185411
WRB	ENSOCUG00000008935	53.4542	94.6046	12.3038	0.130056	-2.9428	5.09244	0.0038514	0.283906	2.41438	Oryctolagus cuniculus tryptophan rich basic protein (WRB), mRNA. [Source:RefSeq mRNA;Acc:NM_001171290]	#	EPYC	ENSOCUG00000013389	672.685	396.949	948.421	2.38928	1.25657	9.2611	0.00881919	0.505901	2.05457	epiphycan [Source:HGNC Symbol;Acc:HGNC:3053]	#		ENSOCUG00000000178	11.9537	13.6543	10.2532	0.750916	-0.413277	3.56464	0.874858	1	0.0580623
-	ENSOCUG00000008993	281.15	411.579	150.722	0.366205	-1.44928	7.96039	0.00904523	0.511428	2.04358	Uncharacterized protein [Source:UniProtKB/TrEMBL;Acc:G1SWB1]	#	MYH11	ENSOCUG00000013450	461.707	207.74	715.674	3.44505	1.78452	8.5909	0.000497187	0.0583266	3.30348	Oryctolagus cuniculus myosin, heavy chain 11, smooth muscle (MYH11), mRNA. [Source:RefSeq mRNA;Acc:NM_001082308]	#		ENSOCUG00000000179	14063.2	11258.9	16867.5	1.49815	0.583182	13.7504	0.164322	1	0.784305
RELN	ENSOCUG00000009050	259.644	410.603	108.684	0.264693	-1.91761	7.7228	0.000836829	0.0874237	3.07736	reelin [Source:HGNC Symbol;Acc:HGNC:9957]	#	-	ENSOCUG00000013591	25.508	4.87652	46.1394	9.46154	3.24207	3.90689	0.0272145	1	1.5652	Uncharacterized protein [Source:UniProtKB/TrEMBL;Acc:G1T5Q3]	#		ENSOCUG00000000181	1.48797	1.95061	1.02532	0.525641	-0.92785	0.5	1	1	0
RAI14	ENSOCUG00000009122	729.503	1100.14	358.862	0.326196	-1.61619	9.29538	0.000768237	0.0830065	3.1145	retinoic acid induced 14 [Source:HGNC Symbol;Acc:HGNC:14873]	#	-	ENSOCUG00000013891	42.4008	5.85183	78.9497	13.4915	3.75397	4.42587	0.00162393	0.145469	2.78943	Uncharacterized protein [Source:UniProtKB/TrEMBL;Acc:G1T6B8]	#		ENSOCUG00000000182	72.3976	55.5924	89.2029	1.60459	0.682203	6.13792	0.412221	1	0.38487
LGR5	ENSOCUG00000009203	437.037	789.997	84.0763	0.106426	-3.23208	8.00967	5.00911e-09	2.25505e-06	8.30024	leucine-rich repeat containing G protein-coupled receptor 5 [Source:HGNC Symbol;Acc:HGNC:4504]	#	SLC25A38	ENSOCUG00000013998	251.791	157.024	346.558	2.20704	1.14211	7.8659	0.0428502	1	1.36805	solute carrier family 25, member 38 [Source:HGNC Symbol;Acc:HGNC:26054]	#		ENSOCUG00000000184	151.872	155.073	148.671	0.958716	-0.0608241	7.2464	0.934881	1	0.0292434
THBS4	ENSOCUG00000009244	5805.76	7821.94	3789.58	0.484481	-1.04549	12.4106	0.0142468	0.693653	1.84628	thrombospondin 4 [Source:HGNC Symbol;Acc:HGNC:11788]	#	GRIP1	ENSOCUG00000014011	75.5611	32.1851	118.937	3.69542	1.88574	5.95119	0.0238589	0.962595	1.62235	glutamate receptor interacting protein 1 [Source:HGNC Symbol;Acc:HGNC:18708]	#		ENSOCUG00000000185	734.755	695.392	774.117	1.11321	0.154724	9.51905	0.74343	1	0.12876
ABCA1	ENSOCUG00000009279	434.211	620.294	248.128	0.400016	-1.32187	8.61587	0.00960348	0.531071	2.01757	ATP-binding cassette, sub-family A (ABC1), member 1 [Source:HGNC Symbol;Acc:HGNC:29]	#	-	ENSOCUG00000014192	60.8565	5.85183	115.861	19.7991	4.30737	4.70257	4.98196e-05	0.00854243	4.3026	Uncharacterized protein [Source:UniProtKB/TrEMBL;Acc:G1T6W2]	#		ENSOCUG00000000186	100.006	98.5058	101.507	1.03046	0.0432949	6.64378	0.967793	1	0.0142174
ALDH1A1	ENSOCUG00000009444	147.246	215.542	78.9497	0.366284	-1.44897	7.02734	0.0269152	1	1.57	retinal dehydrogenase 1 [Source:RefSeq peptide;Acc:NP_001075482]	#	-	ENSOCUG00000014202	54.8296	0.975305	108.684	111.436	6.80007	3.36396	1.38698e-06	0.000364661	5.85793	Uncharacterized protein [Source:UniProtKB/TrEMBL;Acc:G1T6X1]	#		ENSOCUG00000000187	2572.35	3085.86	2058.84	0.667185	-0.583841	11.2995	0.176827	1	0.752452
RBSLO1	ENSOCUG00000009543	39.2123	70.2219	8.20256	0.116809	-3.09778	4.58496	0.00877346	0.505114	2.05683	Oryctolagus cuniculus maxi-K channel alpha subunit (RBSLO1), mRNA. [Source:RefSeq mRNA;Acc:NM_001082070]	#	DUOXA1	ENSOCUG00000014298	177.756	105.333	250.178	2.37512	1.248	7.34281	0.0429715	1	1.36682	dual oxidase maturation factor 1 [Source:HGNC Symbol;Acc:HGNC:26507]	#		ENSOCUG00000000188	1053.13	914.836	1191.42	1.30233	0.3811	10.0279	0.401147	1	0.396697
TMEM263	ENSOCUG00000009563	248.503	345.258	151.747	0.439519	-1.186	7.83853	0.036321	1	1.43984	transmembrane protein 263 [Source:HGNC Symbol;Acc:HGNC:28281]	#	DUOX1	ENSOCUG00000014307	950.184	591.035	1309.33	2.21533	1.14752	9.78086	0.0130484	0.649331	1.88444	dual oxidase 1 [Source:HGNC Symbol;Acc:HGNC:3062]	#		ENSOCUG00000000191	137.593	152.148	123.038	0.808679	-0.306362	7.09615	0.647573	1	0.188711
KIF5C	ENSOCUG00000009699	275.098	447.665	102.532	0.229037	-2.12634	7.7431	0.000199626	0.0269154	3.69978	kinesin family member 5C [Source:HGNC Symbol;Acc:HGNC:6325]	#	NPPC	ENSOCUG00000014358	18.4058	1.95061	34.8609	17.8718	4.15961	3.04373	0.0272892	1	1.56401	natriuretic peptide C [Source:HGNC Symbol;Acc:HGNC:7941]	#		ENSOCUG00000000193	635.574	604.689	666.458	1.10215	0.140321	9.31021	0.77098	1	0.112957
SCARA3	ENSOCUG00000009918	3080.7	4513.71	1647.69	0.365041	-1.45387	11.4132	0.000876924	0.0904149	3.05704	scavenger receptor class A, member 3 [Source:HGNC Symbol;Acc:HGNC:19000]	#	PRSS53	ENSOCUG00000014389	149.084	83.8762	214.292	2.55486	1.35324	7.06681	0.0373506	1	1.4277	protease, serine, 53 [Source:HGNC Symbol;Acc:HGNC:34407]	#		ENSOCUG00000000194	248.04	263.332	232.748	0.883856	-0.178117	7.95168	0.756178	1	0.121376
PLEKHG4	ENSOCUG00000010061	430.122	599.812	260.431	0.434188	-1.20361	8.62656	0.0182021	0.811401	1.73988	pleckstrin homology domain containing, family G (with RhoGef domain) member 4 [Source:HGNC Symbol;Acc:HGNC:24501]	#	MPZ	ENSOCUG00000014421	188.571	63.3948	313.748	4.94911	2.30717	7.13988	0.000252862	0.0326958	3.59712	myelin protein zero [Source:HGNC Symbol;Acc:HGNC:7225]	#		ENSOCUG00000000200	479.912	457.418	502.407	1.09835	0.135344	8.90504	0.787933	1	0.103511
KCTD19	ENSOCUG00000010077	136.968	216.518	57.4179	0.265188	-1.91491	6.80089	0.00489171	0.341446	2.31054	potassium channel tetramerization domain containing 19 [Source:HGNC Symbol;Acc:HGNC:24753]	#	HIST1H1C	ENSOCUG00000014422	326.139	96.5552	555.724	5.7555	2.52494	7.85575	6.85006e-06	0.00152197	5.16431	histone cluster 1, H1c [Source:HGNC Symbol;Acc:HGNC:4716]	#		ENSOCUG00000000201	8.51516	7.80244	9.22788	1.18269	0.242075	3.08496	0.974059	1	0.0114146
TPM2	ENSOCUG00000010198	2187.62	3115.12	1260.12	0.404516	-1.30573	10.9522	0.00304529	0.240197	2.51637	Tropomyosin beta chain [Source:UniProtKB/Swiss-Prot;Acc:P58776]	#	NEU2	ENSOCUG00000014705	97.7931	44.864	150.722	3.35953	1.74826	6.36162	0.0205458	0.867509	1.68728	sialidase 2 (cytosolic sialidase) [Source:HGNC Symbol;Acc:HGNC:7759]	#		ENSOCUG00000000203	169.853	213.592	126.114	0.590446	-0.760123	7.35865	0.22043	1	0.656729
MMP14	ENSOCUG00000010244	7129.6	9575.54	4683.66	0.489128	-1.03172	12.7093	0.0152317	0.730333	1.81725	Oryctolagus cuniculus matrix metallopeptidase 14 (membrane-inserted) (MMP14), mRNA. [Source:RefSeq mRNA;Acc:NM_001082793]	#	AGBL3	ENSOCUG00000014749	82.3507	27.3085	137.393	5.03114	2.33088	5.93672	0.00467258	0.330538	2.33044	ATP/GTP binding protein-like 3 [Source:HGNC Symbol;Acc:HGNC:27981]	#		ENSOCUG00000000206	1.00031	0.975305	1.02532	1.05128	0.0721498	1.28137e-15	1	1	0
-	ENSOCUG00000010254	130.828	196.036	65.6205	0.334737	-1.5789	6.82553	0.0205672	0.867509	1.68682	Uncharacterized protein [Source:UniProtKB/TrEMBL;Acc:G1SYX9]	#	SLC10A6	ENSOCUG00000014905	241.663	112.16	371.166	3.30925	1.72651	7.67267	0.00285697	0.231121	2.5441	solute carrier family 10 (sodium/bile acid cotransporter), member 6 [Source:HGNC Symbol;Acc:HGNC:30603]	#		ENSOCUG00000000214	78.7871	106.308	51.266	0.482239	-1.05218	6.20602	0.190722	1	0.719599
ALOX15B	ENSOCUG00000010340	468.671	635.899	301.444	0.474044	-1.07691	8.7742	0.031763	1	1.49808	arachidonate 15-lipoxygenase, type B [Source:HGNC Symbol;Acc:HGNC:434]	#	BHLHE40	ENSOCUG00000015177	923.101	567.627	1278.57	2.25249	1.17152	9.73456	0.011518	0.59398	1.93862	basic helix-loop-helix family, member e40 [Source:HGNC Symbol;Acc:HGNC:1046]	#		ENSOCUG00000000215	302.332	225.295	379.369	1.68387	0.751782	8.19157	0.163073	1	0.787617
ARHGAP24	ENSOCUG00000010654	429.859	630.047	229.672	0.364531	-1.45589	8.57137	0.00455105	0.326331	2.34189	Rho GTPase activating protein 24 [Source:HGNC Symbol;Acc:HGNC:25361]	#	SCN1B	ENSOCUG00000015301	285.127	136.543	433.711	3.17637	1.66738	7.9269	0.00275489	0.224022	2.55989	Oryctolagus cuniculus sodium channel, voltage-gated, type I, beta (SCN1B), mRNA. [Source:RefSeq mRNA;Acc:NM_001082359]	#		ENSOCUG00000000218	48.7402	58.5183	38.9622	0.665812	-0.586813	5.57741	0.555269	1	0.255496
HSPB7	ENSOCUG00000010852	138.631	211.641	65.6205	0.310056	-1.6894	6.88078	0.0119556	0.602557	1.92243	heat shock 27kDa protein family, member 7 (cardiovascular) [Source:HGNC Symbol;Acc:HGNC:5249]	#	PLXNA4	ENSOCUG00000015552	603.464	377.443	829.484	2.19764	1.13596	9.12809	0.0191071	0.832637	1.71881	plexin A4 [Source:HGNC Symbol;Acc:HGNC:9102]	#		ENSOCUG00000000220	293.679	322.826	264.533	0.819428	-0.28731	8.19096	0.598157	1	0.223185
TTC37	ENSOCUG00000010853	395.399	534.467	256.33	0.479599	-1.0601	8.53191	0.0396292	1	1.40198	tetratricopeptide repeat domain 37 [Source:HGNC Symbol;Acc:HGNC:23639]	#	TNNT2	ENSOCUG00000015634	126.99	45.8393	208.14	4.54064	2.1829	6.60996	0.00192584	0.168612	2.71538	troponin T type 2 (cardiac) [Source:HGNC Symbol;Acc:HGNC:11949]	#		ENSOCUG00000000222	11.4911	11.7037	11.2785	0.963675	-0.0533811	3.5222	1	1	0
-	ENSOCUG00000010890	367.627	637.849	97.4054	0.152709	-2.71114	7.9615	1.00587e-06	0.000275977	5.99746	Uncharacterized protein [Source:UniProtKB/TrEMBL;Acc:G1T070]	#	ATP13A4	ENSOCUG00000015801	255.38	117.037	393.723	3.3641	1.75022	7.74593	0.00221729	0.187047	2.65418	ATPase type 13A4 [Source:HGNC Symbol;Acc:HGNC:25422]	#		ENSOCUG00000000224	30.9222	13.6543	48.1901	3.5293	1.81938	4.68097	0.140248	1	0.853105
-	ENSOCUG00000010933	90.7409	159.95	21.5317	0.134615	-2.89308	5.87493	0.000431839	0.052469	3.36468	-	#	SFRP4	ENSOCUG00000015877	56.3176	2.92591	109.709	37.4957	5.22865	4.16321	1.13636e-05	0.00239014	4.94448	secreted frizzled-related protein 4 [Source:HGNC Symbol;Acc:HGNC:10778]	#		ENSOCUG00000000227	953.073	858.268	1047.88	1.22092	0.28797	9.88927	0.529583	1	0.276066
-	ENSOCUG00000010984	812.529	1141.11	483.951	0.424107	-1.2375	9.53747	0.00848197	0.491923	2.0715	Uncharacterized protein [Source:UniProtKB/TrEMBL;Acc:G1T0D5]	#	MYOC	ENSOCUG00000015957	912.848	447.665	1378.03	3.07826	1.62212	9.61733	0.000554366	0.0624652	3.2562	Oryctolagus cuniculus myocilin, trabecular meshwork inducible glucocorticoid response (MYOC), mRNA. [Source:RefSeq mRNA;Acc:NM_001082150]	#		ENSOCUG00000000228	179.281	125.814	232.748	1.84993	0.887471	7.41889	0.146547	1	0.834022
COL8A2	ENSOCUG00000011042	410.816	592.985	228.646	0.385585	-1.37488	8.52441	0.00768375	0.455681	2.11443	collagen, type VIII, alpha 2 [Source:HGNC Symbol;Acc:HGNC:2216]	#	PARD6B	ENSOCUG00000015993	268.959	147.271	390.647	2.65257	1.40739	7.90603	0.0118775	0.602466	1.92528	par-6 family cell polarity regulator beta [Source:HGNC Symbol;Acc:HGNC:16245]	#		ENSOCUG00000000229	567.928	523.739	612.116	1.16874	0.224959	9.14518	0.643788	1	0.191257
LRRC17	ENSOCUG00000011161	1254.13	1733.12	775.142	0.447253	-1.16084	10.1787	0.010329	0.559066	1.98594	leucine rich repeat containing 17 [Source:HGNC Symbol;Acc:HGNC:16895]	#	NPAS1	ENSOCUG00000016061	21.4317	3.90122	38.9622	9.98718	3.32008	3.62396	0.040144	1	1.39638	neuronal PAS domain protein 1 [Source:HGNC Symbol;Acc:HGNC:7894]	#		ENSOCUG00000000230	4.4639	5.85183	3.07596	0.525641	-0.92785	2.08496	0.86147	1	0.0647596
SRPX2	ENSOCUG00000011186	222.982	360.863	85.1016	0.235828	-2.08419	7.45321	0.000501625	0.0583266	3.29962	sushi-repeat containing protein, X-linked 2 [Source:HGNC Symbol;Acc:HGNC:30668]	#	NT5DC3	ENSOCUG00000016271	309.122	180.431	437.812	2.42647	1.27886	8.13474	0.0182083	0.811401	1.73973	5'-nucleotidase domain containing 3 [Source:HGNC Symbol;Acc:HGNC:30826]	#		ENSOCUG00000000231	93.5667	89.728	97.4054	1.08556	0.118443	6.54671	0.888012	1	0.0515814
FAM83D	ENSOCUG00000011298	307.584	420.356	194.811	0.463442	-1.10954	8.1607	0.0400262	1	1.39766	family with sequence similarity 83, member D [Source:HGNC Symbol;Acc:HGNC:16122]	#	CADM3	ENSOCUG00000016385	140.481	59.4936	221.469	3.72257	1.8963	6.84281	0.00488397	0.341446	2.31123	cell adhesion molecule 3 [Source:HGNC Symbol;Acc:HGNC:17601]	#		ENSOCUG00000000232	4.4889	4.87652	4.10128	0.841026	-0.249778	2.16096	1	1	0
CDC20	ENSOCUG00000011340	247.277	353.06	141.494	0.400765	-1.31917	7.80419	0.020444	0.867509	1.68943	cell division cycle 20 [Source:HGNC Symbol;Acc:HGNC:1723]	#	NDRG1	ENSOCUG00000016394	1572.78	982.132	2163.43	2.20279	1.13933	10.5094	0.0106332	0.568608	1.97333	N-myc downstream regulated 1 [Source:HGNC Symbol;Acc:HGNC:7679]	#		ENSOCUG00000000233	2.51329	1.95061	3.07596	1.57692	0.657112	1.29248	0.98818	1	0.00516405
SPON1	ENSOCUG00000011350	1496.59	2293.92	699.269	0.304836	-1.71389	10.3067	0.000161756	0.0229341	3.79114	spondin 1, extracellular matrix protein [Source:HGNC Symbol;Acc:HGNC:11252]	#	CPVL	ENSOCUG00000016573	506.921	243.826	770.016	3.15805	1.65903	8.75923	0.000979564	0.0984243	3.00897	carboxypeptidase, vitellogenic-like [Source:HGNC Symbol;Acc:HGNC:14399]	#		ENSOCUG00000000234	404.764	429.134	380.394	0.886422	-0.173935	8.65832	0.73592	1	0.13317
F13A1	ENSOCUG00000011452	155.349	259.431	51.266	0.197609	-2.33928	6.84957	0.000459298	0.0548896	3.33791	coagulation factor XIII, A1 polypeptide [Source:HGNC Symbol;Acc:HGNC:3531]	#	NELL2	ENSOCUG00000016727	98.2557	6.82713	189.684	27.7839	4.79618	5.16937	1.58142e-07	4.98936e-05	6.80095	NEL-like 2 (chicken) [Source:HGNC Symbol;Acc:HGNC:7751]	#		ENSOCUG00000000236	155.136	127.765	182.507	1.42846	0.51446	7.25458	0.419832	1	0.376925
POSTN	ENSOCUG00000011482	3348.6	5322.24	1374.95	0.258341	-1.95265	11.4015	1.02581e-05	0.00224751	4.98893	periostin, osteoblast specific factor [Source:HGNC Symbol;Acc:HGNC:16953]	#	IL1R2	ENSOCUG00000016746	1100.56	724.651	1476.46	2.03748	1.02678	10.0145	0.0242112	0.96937	1.61598	interleukin 1 receptor, type II [Source:HGNC Symbol;Acc:HGNC:5994]	#		ENSOCUG00000000237	203.676	234.073	173.279	0.740278	-0.433861	7.65389	0.463618	1	0.333839
RHOBTB1	ENSOCUG00000011533	234.011	330.628	137.393	0.415551	-1.2669	7.73562	0.0277473	1	1.55678	Rho-related BTB domain containing 1 [Source:HGNC Symbol;Acc:HGNC:18738]	#	RAMP1	ENSOCUG00000016751	174.392	56.5677	292.216	5.16578	2.36899	7.0064	0.000244764	0.0319103	3.61125	receptor (G protein-coupled) activity modifying protein 1 [Source:HGNC Symbol;Acc:HGNC:9843]	#		ENSOCUG00000000244	496.155	523.739	468.571	0.894666	-0.160578	8.95241	0.747492	1	0.126393
HSPA2	ENSOCUG00000011745	1082.09	1584.87	579.306	0.365523	-1.45197	9.90417	0.0016322	0.145469	2.78723	heat shock 70kDa protein 2 [Source:HGNC Symbol;Acc:HGNC:5235]	#	AKR1D1	ENSOCUG00000016986	56.8428	22.432	91.2535	4.068	2.02432	5.49965	0.0315545	1	1.50094	Oryctolagus cuniculus aldo-keto reductase family 1, member D1 (delta 4-3-ketosteroid-5-beta-reductase) (AKR1D1), mRNA. [Source:RefSeq mRNA;Acc:NM_001081997]	#		ENSOCUG00000000245	887.24	926.54	847.94	0.915169	-0.12789	9.79176	0.782898	1	0.106295
NR4A1	ENSOCUG00000011746	285.289	390.122	180.456	0.462564	-1.11227	8.05164	0.0426806	1	1.36977	nuclear receptor subfamily 4, group A, member 1 [Source:HGNC Symbol;Acc:HGNC:7980]	#	CDK5RAP1	ENSOCUG00000017069	183.495	101.432	265.558	2.6181	1.38852	7.35862	0.0236234	0.955538	1.62666	CDK5 regulatory subunit associated protein 1 [Source:HGNC Symbol;Acc:HGNC:15880]	#		ENSOCUG00000000247	739.394	814.38	664.408	0.815845	-0.293633	9.52274	0.532041	1	0.274055
STARD13	ENSOCUG00000011808	457.455	613.467	301.444	0.491378	-1.02509	8.74829	0.0414866	1	1.38209	StAR-related lipid transfer (START) domain containing 13 [Source:HGNC Symbol;Acc:HGNC:19164]	#	ACSM1	ENSOCUG00000017141	29.0216	7.80244	50.2407	6.4391	2.68686	4.30735	0.0427719	1	1.36884	acyl-CoA synthetase medium-chain family member 1 [Source:HGNC Symbol;Acc:HGNC:18049]	#		ENSOCUG00000000248	5.97687	6.82713	5.1266	0.750916	-0.413277	2.56464	0.951121	1	0.0217642
HSD11B2	ENSOCUG00000011843	71.3098	118.012	24.6077	0.208519	-2.26175	5.75191	0.00931945	0.52064	2.03061	Oryctolagus cuniculus hydroxysteroid (11-beta) dehydrogenase 2 (HSD11B2), mRNA. [Source:RefSeq mRNA;Acc:NM_001082752]	#	-	ENSOCUG00000017233	352.448	190.184	514.711	2.70638	1.43636	8.28944	0.00676434	0.421768	2.16977	-	#		ENSOCUG00000000249	314.211	281.863	346.558	1.22953	0.298104	8.2879	0.578755	1	0.237505
PHACTR1	ENSOCUG00000011982	224.57	318.925	130.216	0.408296	-1.29231	7.67092	0.0263125	1	1.57984	phosphatase and actin regulator 1 [Source:HGNC Symbol;Acc:HGNC:20990]	#	PNPLA7	ENSOCUG00000017544	305.133	196.036	414.229	2.11302	1.07931	8.15463	0.0458641	1	1.33853	patatin-like phospholipase domain containing 7 [Source:HGNC Symbol;Acc:HGNC:24768]	#		ENSOCUG00000000251	1848.43	1928.18	1768.68	0.917279	-0.124567	10.8507	0.77663	1	0.109786
COCH	ENSOCUG00000012042	678.95	1252.29	105.608	0.0843318	-3.56778	8.50647	1.46573e-11	8.89303e-09	10.8339	cochlin [Source:HGNC Symbol;Acc:HGNC:2180]	#	CYP1A1	ENSOCUG00000017744	28.6089	3.90122	53.3167	13.6667	3.77259	3.85022	0.00888442	0.505963	2.05137	Oryctolagus cuniculus polycyclic hydrocarbon-inducible cytochrome P450c (LOC100328613), mRNA. [Source:RefSeq mRNA;Acc:NM_001171072]	#		ENSOCUG00000000255	104.733	114.111	95.3548	0.835634	-0.259056	6.70476	0.727946	1	0.137901
CHST2	ENSOCUG00000012132	220.119	332.579	107.659	0.323709	-1.62723	7.56394	0.00584905	0.38034	2.23291	carbohydrate (N-acetylglucosamine-6-O) sulfotransferase 2 [Source:HGNC Symbol;Acc:HGNC:1970]	#	OSBP2	ENSOCUG00000017841	66.8709	31.2098	102.532	3.28526	1.71601	5.82193	0.0486232	1	1.31316	oxysterol binding protein 2 [Source:HGNC Symbol;Acc:HGNC:8504]	#		ENSOCUG00000000256	49.3029	56.5677	42.0381	0.743148	-0.428279	5.60777	0.670466	1	0.173623
EMILIN3	ENSOCUG00000012388	130.841	215.542	46.1394	0.214062	-2.2239	6.63988	0.0014812	0.135063	2.82939	elastin microfibril interfacer 3 [Source:HGNC Symbol;Acc:HGNC:16123]	#	WFDC5	ENSOCUG00000020941	1190.75	746.108	1635.39	2.19189	1.13217	10.1093	0.0126223	0.630117	1.89886	WAP four-disulfide core domain 5 [Source:HGNC Symbol;Acc:HGNC:20477]	#		ENSOCUG00000000258	2368.2	2630.4	2106.01	0.800643	-0.32077	11.2007	0.458755	1	0.338419
CHST10	ENSOCUG00000012868	329.165	458.393	199.937	0.43617	-1.19704	8.24192	0.0250412	0.992526	1.60134	carbohydrate sulfotransferase 10 [Source:HGNC Symbol;Acc:HGNC:19650]	#	CSTB	ENSOCUG00000020975	9171.12	5332.97	13009.3	2.43941	1.28653	13.024	0.00253932	0.209727	2.59528	cystatin B (stefin B) [Source:HGNC Symbol;Acc:HGNC:2482]	#		ENSOCUG00000000259	60.5314	58.5183	62.5445	1.0688	0.0959965	5.91881	0.933092	1	0.0300755
ANGPTL7	ENSOCUG00000013081	48.4526	89.728	7.17724	0.0799889	-3.64406	4.66546	0.00110196	0.105354	2.95784	angiopoietin-like 7 [Source:HGNC Symbol;Acc:HGNC:24078]	#	-	ENSOCUG00000021074	5747.31	3403.81	8090.8	2.37698	1.24913	12.3575	0.00355545	0.267294	2.44911	Uncharacterized protein [Source:UniProtKB/TrEMBL;Acc:G1TI98]	#		ENSOCUG00000000263	261.407	241.876	280.938	1.1615	0.215986	8.02611	0.701222	1	0.154144
COL11A1	ENSOCUG00000013367	5846.19	8864.55	2827.83	0.319005	-1.64835	12.2897	0.000140669	0.0203584	3.8518	collagen, type XI, alpha 1 [Source:HGNC Symbol;Acc:HGNC:2186]	#	-	ENSOCUG00000021101	2508.36	1462.96	3553.76	2.42916	1.28046	11.1549	0.00346028	0.2637	2.46089	-	#		ENSOCUG00000000264	1902.13	1973.04	1831.22	0.928121	-0.107614	10.8924	0.806264	1	0.093523
-	ENSOCUG00000013412	73.0353	130.691	15.3798	0.117681	-3.08705	5.48649	0.000634904	0.0700392	3.19729	-	#	HYI	ENSOCUG00000021143	315.611	147.271	483.951	3.28613	1.71639	8.06052	0.00168318	0.149169	2.77387	hydroxypyruvate isomerase (putative) [Source:HGNC Symbol;Acc:HGNC:26948]	#		ENSOCUG00000000265	7.46483	8.77774	6.15192	0.700855	-0.512813	2.87744	0.895921	1	0.0477304
SYTL2	ENSOCUG00000013753	77.9494	118.987	36.9115	0.310214	-1.68866	6.05033	0.0394765	1	1.40366	synaptotagmin-like 2 [Source:HGNC Symbol;Acc:HGNC:15585]	#	-	ENSOCUG00000021152	69.5592	26.3332	112.785	4.283	2.09862	5.76812	0.0158379	0.748033	1.8003	Uncharacterized protein [Source:UniProtKB/TrEMBL;Acc:G1TDX6]	#		ENSOCUG00000000269	31.3473	37.0616	25.633	0.691633	-0.531922	4.94589	0.671528	1	0.172936
IL33	ENSOCUG00000013813	300.706	408.653	192.76	0.471697	-1.08407	8.1327	0.045691	1	1.34017	interleukin 33 [Source:HGNC Symbol;Acc:HGNC:16028]	#	-	ENSOCUG00000021166	321.325	144.345	498.306	3.45218	1.78751	8.06713	0.00105791	0.103655	2.97555	Uncharacterized protein [Source:UniProtKB/TrEMBL;Acc:G1SRS9]	#		ENSOCUG00000000270	53.1166	47.7899	58.4433	1.22292	0.29033	5.7238	0.771715	1	0.112543
LTBP2	ENSOCUG00000014077	2988.5	4390.82	1586.17	0.361247	-1.46894	11.3658	0.000787178	0.0843836	3.10393	latent transforming growth factor beta binding protein 2 [Source:HGNC Symbol;Acc:HGNC:6715]	#	USP35	ENSOCUG00000021262	173.854	97.5305	250.178	2.56513	1.35903	7.2873	0.0289199	1	1.5388	ubiquitin specific peptidase 35 [Source:HGNC Symbol;Acc:HGNC:20061]	#		ENSOCUG00000000271	52.5414	30.2344	74.8484	2.4756	1.30778	5.57201	0.169465	1	0.770921
MYC	ENSOCUG00000014289	508.559	679.787	337.33	0.496229	-1.01092	8.90348	0.041071	1	1.38646	v-myc avian myelocytomatosis viral oncogene homolog [Source:HGNC Symbol;Acc:HGNC:7553]	#	C11orf96	ENSOCUG00000021313	293.792	138.493	449.09	3.24269	1.69719	7.96227	0.00218877	0.186637	2.6598	chromosome 11 open reading frame 96 [Source:HGNC Symbol;Acc:HGNC:38675]	#		ENSOCUG00000000272	1201.75	1236.69	1166.81	0.943501	-0.0839044	10.2303	0.853307	1	0.0688948
HEG1	ENSOCUG00000014625	538.318	758.787	317.849	0.418891	-1.25535	8.93988	0.0109817	0.579386	1.95933	heart development protein with EGF-like domains 1 [Source:HGNC Symbol;Acc:HGNC:29227]	#	-	ENSOCUG00000021764	212.041	127.765	296.318	2.31924	1.21365	7.60417	0.0391444	1	1.40733	-	#		ENSOCUG00000000274	540.619	509.109	572.129	1.12378	0.168365	9.07601	0.732075	1	0.135444
EFEMP1	ENSOCUG00000014657	265.083	378.418	151.747	0.401004	-1.31831	7.90468	0.01862	0.820475	1.73002	EGF containing fibulin-like extracellular matrix protein 1 [Source:HGNC Symbol;Acc:HGNC:3218]	#	EML2	ENSOCUG00000021801	542.47	316.974	767.965	2.4228	1.27668	8.94656	0.0096283	0.531071	2.01645	echinoderm microtubule associated protein like 2 [Source:HGNC Symbol;Acc:HGNC:18035]	#		ENSOCUG00000000276	216.643	228.221	205.064	0.898532	-0.154359	7.75711	0.796387	1	0.0988756
IGF1	ENSOCUG00000014689	501.519	694.417	308.621	0.444432	-1.16996	8.85468	0.0186918	0.821347	1.72835	insulin-like growth factor 1 (somatomedin C) [Source:HGNC Symbol;Acc:HGNC:5464]	#	CSRNP1	ENSOCUG00000022080	1208.08	750.009	1666.15	2.2215	1.15153	10.1265	0.0111347	0.583552	1.95332	cysteine-serine-rich nuclear protein 1 [Source:HGNC Symbol;Acc:HGNC:14300]	#		ENSOCUG00000000277	4.00125	3.90122	4.10128	1.05128	0.0721498	2	1	1	0
COL5A3	ENSOCUG00000014857	7079.68	10343.1	3816.24	0.368965	-1.43844	12.6172	0.000803681	0.0850877	3.09492	collagen, type V, alpha 3 [Source:HGNC Symbol;Acc:HGNC:14864]	#	FXYD1	ENSOCUG00000022123	414.355	235.048	593.661	2.52569	1.33668	8.54515	0.00934016	0.52064	2.02965	FXYD domain containing ion transport regulator 1 [Source:HGNC Symbol;Acc:HGNC:4025]	#		ENSOCUG00000000278	497.093	507.159	487.027	0.960306	-0.0584343	8.95708	0.909676	1	0.0411134
SH3RF3	ENSOCUG00000014996	449.278	652.479	246.077	0.377142	-1.40682	8.64638	0.00569711	0.372913	2.24435	SH3 domain containing ring finger 3 [Source:HGNC Symbol;Acc:HGNC:24699]	#	-	ENSOCUG00000022517	84.889	28.2838	141.494	5.00265	2.32269	5.98325	0.00434243	0.312793	2.36227	Uncharacterized protein [Source:UniProtKB/TrEMBL;Acc:G1TLG1]	#		ENSOCUG00000000280	16.9553	18.5308	15.3798	0.82996	-0.268887	4.07741	0.90498	1	0.0433611
COL5A2	ENSOCUG00000015020	22238.1	32271.9	12204.4	0.378174	-1.40288	14.2766	0.000957632	0.0968374	3.0188	collagen, type V, alpha 2 [Source:HGNC Symbol;Acc:HGNC:2210]	#	ART1	ENSOCUG00000022791	199.487	57.543	341.432	5.93351	2.56889	7.13101	4.44449e-05	0.0077046	4.35218	Oryctolagus cuniculus ADP-ribosyltransferase 1 (ART1), mRNA. [Source:RefSeq mRNA;Acc:NM_001082670]	#		ENSOCUG00000000281	62.482	62.4195	62.5445	1.002	0.00288712	5.96537	1	1	0
MPEG1	ENSOCUG00000015057	182.182	292.591	71.7724	0.245299	-2.02739	7.17905	0.00127641	0.120571	2.89401	macrophage expressed 1 [Source:HGNC Symbol;Acc:HGNC:29619]	#	-	ENSOCUG00000022885	343.657	193.11	494.204	2.55918	1.35568	8.27112	0.0107766	0.572972	1.96752	Uncharacterized protein [Source:UniProtKB/TrEMBL;Acc:G1TPV7]	#		ENSOCUG00000000285	438.975	414.505	463.445	1.11807	0.16101	8.77575	0.751752	1	0.123925
C1QC	ENSOCUG00000015138	367.89	527.64	208.14	0.394474	-1.342	8.37241	0.0106139	0.568608	1.97412	complement component 1, q subcomponent, C chain [Source:HGNC Symbol;Acc:HGNC:1245]	#	-	ENSOCUG00000022888	283.426	2.92591	563.926	192.735	7.59048	5.34413	1.41687e-19	1.71932e-16	18.8487	Uncharacterized protein [Source:UniProtKB/TrEMBL;Acc:G1SCJ6]	#		ENSOCUG00000000286	367.127	337.455	396.799	1.17586	0.233711	8.51541	0.654588	1	0.184032
-	ENSOCUG00000015143	102.607	157.024	48.1901	0.306896	-1.70418	6.44275	0.0216561	0.899013	1.66442	-	#	-	ENSOCUG00000023002	443.314	185.308	701.319	3.78462	1.92015	8.49385	0.000211227	0.0277676	3.67525	Uncharacterized protein [Source:UniProtKB/TrEMBL;Acc:G1U454]	#		ENSOCUG00000000289	439.162	467.171	411.154	0.880092	-0.184274	8.77567	0.716658	1	0.144688
PDGFD	ENSOCUG00000015312	300.344	482.776	117.912	0.244237	-2.03364	7.89839	0.000274946	0.0349781	3.56075	platelet derived growth factor D [Source:HGNC Symbol;Acc:HGNC:30620]	#	-	ENSOCUG00000023008	24.5577	1.95061	47.1647	24.1795	4.59571	3.26178	0.00612648	0.388134	2.21279	-	#		ENSOCUG00000000290	742.332	599.812	884.852	1.47521	0.560924	9.50883	0.231991	1	0.634529
COL12A1	ENSOCUG00000015320	9453.67	14367.2	4540.12	0.316005	-1.66198	12.9795	0.000112725	0.0167758	3.94798	collagen, type XII, alpha 1 [Source:HGNC Symbol;Acc:HGNC:2188]	#	-	ENSOCUG00000023102	1733.53	990.91	2476.15	2.49886	1.32127	10.6132	0.00302306	0.23986	2.51955	Uncharacterized protein [Source:UniProtKB/TrEMBL;Acc:G1TUQ3]	#		ENSOCUG00000000291	515.211	540.319	490.103	0.907063	-0.140726	9.0073	0.777075	1	0.109537
ACTN1	ENSOCUG00000015449	1387.83	1936.96	838.712	0.433005	-1.20754	10.3158	0.00730065	0.441256	2.13664	actinin, alpha 1 [Source:HGNC Symbol;Acc:HGNC:163]	#	CST6	ENSOCUG00000023396	2530.38	1663.87	3396.89	2.04156	1.02967	11.2152	0.0180453	0.808704	1.74364	cystatin E/M [Source:HGNC Symbol;Acc:HGNC:2478]	#		ENSOCUG00000000292	7.53986	5.85183	9.22788	1.57692	0.657112	2.87744	0.847747	1	0.0717335
KIF20A	ENSOCUG00000015790	143.682	214.567	72.7978	0.339277	-1.55946	6.96555	0.0184756	0.816394	1.7334	kinesin family member 20A [Source:HGNC Symbol;Acc:HGNC:9787]	#	-	ENSOCUG00000023425	131.379	14.6296	248.128	16.9607	4.08412	5.91288	1.73425e-07	5.36427e-05	6.76089	Uncharacterized protein [Source:UniProtKB/TrEMBL;Acc:G1TZC1]	#		ENSOCUG00000000293	1.00031	0.975305	1.02532	1.05128	0.0721498	1.28137e-15	1	1	0
PAI1	ENSOCUG00000016068	242.813	387.196	98.4308	0.254214	-1.97588	7.60898	0.000720046	0.078336	3.14264	Uncharacterized protein [Source:UniProtKB/TrEMBL;Acc:G1TAU6]	#	-	ENSOCUG00000023492	27.6086	2.92591	52.2913	17.8718	4.15961	3.62869	0.00609203	0.387507	2.21524	Uncharacterized protein [Source:UniProtKB/TrEMBL;Acc:G1T814]	#		ENSOCUG00000000298	797.049	825.108	768.99	0.931988	-0.101617	9.63763	0.82927	1	0.081304
EREG	ENSOCUG00000016277	717.699	1000.66	434.736	0.434448	-1.20274	9.36537	0.0114877	0.59398	1.93977	epiregulin [Source:HGNC Symbol;Acc:HGNC:3443]	#	-	ENSOCUG00000023532	161.726	10.7284	312.723	29.1492	4.86538	5.85605	3.84163e-10	2.16435e-07	9.41548	-	#		ENSOCUG00000000300	681.901	737.33	626.471	0.849647	-0.235064	9.40864	0.620668	1	0.207141
CLEC4G	ENSOCUG00000016293	234.236	321.851	146.621	0.455556	-1.1343	7.7631	0.0480398	1	1.3184	C-type lectin domain family 4, member G [Source:HGNC Symbol;Acc:HGNC:24591]	#	-	ENSOCUG00000023535	150.209	79.975	220.444	2.75641	1.46279	7.05287	0.0245363	0.977426	1.61019	-	#		ENSOCUG00000000301	388.184	435.961	340.406	0.780818	-0.356942	8.58959	0.487926	1	0.311646
PLXNB3	ENSOCUG00000016506	659.731	902.157	417.305	0.462564	-1.11227	9.2611	0.0203461	0.867509	1.69152	plexin B3 [Source:HGNC Symbol;Acc:HGNC:9105]	#	-	ENSOCUG00000023579	921.175	242.851	1599.5	6.58635	2.71948	9.28367	2.80108e-08	1.05207e-05	7.55267	Uncharacterized protein [Source:UniProtKB/TrEMBL;Acc:G1TY37]	#		ENSOCUG00000000302	142.632	135.567	149.697	1.10422	0.143033	7.15438	0.835348	1	0.0781326
MYH10	ENSOCUG00000016624	923.038	1309.83	536.243	0.409397	-1.28843	9.71096	0.0056013	0.369709	2.25171	myosin, heavy chain 10, non-muscle [Source:HGNC Symbol;Acc:HGNC:7568]	#	FAM89A	ENSOCUG00000023617	273.923	133.617	414.229	3.10013	1.63233	7.87812	0.00362127	0.270737	2.44114	family with sequence similarity 89, member A [Source:HGNC Symbol;Acc:HGNC:25057]	#		ENSOCUG00000000304	213.254	220.419	206.089	0.93499	-0.0969775	7.73562	0.875222	1	0.0578818
PTGS2	ENSOCUG00000016771	155.048	271.135	38.9622	0.1437	-2.79886	6.68343	4.32167e-05	0.00757493	4.36435	Oryctolagus cuniculus prostaglandin-endoperoxide synthase 2 (prostaglandin G/H synthase and cyclooxygenase) (PTGS2), mRNA. [Source:RefSeq mRNA;Acc:NM_001082388]	#	-	ENSOCUG00000023673	190.247	78.0244	302.47	3.8766	1.95479	7.26325	0.00160202	0.144411	2.79533	Uncharacterized protein [Source:UniProtKB/TrEMBL;Acc:G1TFE0]	#		ENSOCUG00000000305	87.965	108.259	67.6712	0.625087	-0.677872	6.4194	0.379553	1	0.420728
ALDH1A2	ENSOCUG00000016942	1495.28	2725	265.558	0.0974524	-3.35916	9.73246	5.07395e-12	3.33507e-09	11.2947	aldehyde dehydrogenase 1 family, member A2 [Source:HGNC Symbol;Acc:HGNC:15472]	#	DDIT3	ENSOCUG00000023877	493.542	325.752	661.332	2.03017	1.0216	8.85843	0.0397994	1	1.40012	DNA-damage-inducible transcript 3 [Source:HGNC Symbol;Acc:HGNC:2726]	#		ENSOCUG00000000306	783.27	922.638	643.901	0.697891	-0.518926	9.59016	0.266098	1	0.574958
TMPRSS4	ENSOCUG00000016983	2383.09	3349.2	1416.99	0.423084	-1.24098	11.0891	0.00465001	0.330538	2.33255	transmembrane protease, serine 4 [Source:HGNC Symbol;Acc:HGNC:11878]	#	COL6A5	ENSOCUG00000024036	505.646	53.6418	957.649	17.8527	4.15807	7.82432	2.74882e-13	2.06489e-10	12.5609	collagen, type VI, alpha 5 [Source:HGNC Symbol;Acc:HGNC:26674]	#		ENSOCUG00000000307	430.522	304.295	556.749	1.82964	0.871556	8.68511	0.0850777	1	1.07018
WWC2	ENSOCUG00000016984	240.625	332.579	148.671	0.447026	-1.16157	7.79677	0.0417355	1	1.37949	WW and C2 domain containing 2 [Source:HGNC Symbol;Acc:HGNC:24148]	#	SULF2	ENSOCUG00000024273	798.262	517.887	1078.64	2.08277	1.0585	9.54574	0.0240029	0.965931	1.61974	sulfatase 2 [Source:HGNC Symbol;Acc:HGNC:20392]	#		ENSOCUG00000000310	17.1053	12.679	21.5317	1.69822	0.764027	4.04638	0.659875	1	0.180538
CDH11	ENSOCUG00000017019	2504.33	3659.34	1349.32	0.368733	-1.43935	11.1177	0.00106609	0.103812	2.9722	cadherin 11, type 2, OB-cadherin (osteoblast) [Source:HGNC Symbol;Acc:HGNC:1750]	#	-	ENSOCUG00000024437	168.678	99.4811	237.874	2.39115	1.25771	7.2652	0.0444414	1	1.35221	Uncharacterized protein [Source:UniProtKB/TrEMBL;Acc:G1TRH9]	#		ENSOCUG00000000312	1134.47	1401.51	867.421	0.618918	-0.692181	10.1067	0.125854	1	0.900134
CCDC84	ENSOCUG00000017244	171.128	243.826	98.4308	0.403692	-1.30867	7.27537	0.0361461	1	1.44194	coiled-coil domain containing 84 [Source:HGNC Symbol;Acc:HGNC:30460]	#	ID2	ENSOCUG00000024446	321.263	166.777	475.749	2.8526	1.51228	8.13792	0.00518092	0.356942	2.28559	inhibitor of DNA binding 2, dominant negative helix-loop-helix protein [Source:HGNC Symbol;Acc:HGNC:5361]	#		ENSOCUG00000000315	29.7843	38.0369	21.5317	0.566075	-0.820935	4.83886	0.512975	1	0.289904
EDIL3	ENSOCUG00000017338	356.686	524.714	188.659	0.359546	-1.47575	8.29751	0.0053758	0.361499	2.26956	EGF-like repeats and discoidin I-like domains 3 [Source:HGNC Symbol;Acc:HGNC:3173]	#	-	ENSOCUG00000024499	66.3832	30.2344	102.532	3.39123	1.76181	5.79903	0.0438728	1	1.3578	Uncharacterized protein [Source:UniProtKB/TrEMBL;Acc:G1T7Q5]	#		ENSOCUG00000000318	153.923	155.073	152.773	0.985164	-0.0215646	7.26603	0.984471	1	0.00679718
ATF3	ENSOCUG00000017424	529.853	789.022	270.685	0.343064	-1.54345	8.8522	0.0019655	0.169721	2.70653	activating transcription factor 3 [Source:HGNC Symbol;Acc:HGNC:785]	#	-	ENSOCUG00000024676	17.4054	0.975305	33.8356	34.6923	5.11654	2.5222	0.0165848	0.771756	1.78029	Uncharacterized protein [Source:UniProtKB/TrEMBL;Acc:G1U473]	#		ENSOCUG00000000320	59.6061	54.6171	64.5952	1.18269	0.242075	5.89232	0.801271	1	0.0962205
SDPR	ENSOCUG00000017723	87.2898	134.592	39.9875	0.297101	-1.75097	6.19696	0.0262213	1	1.58135	serum deprivation response [Source:HGNC Symbol;Acc:HGNC:10690]	#	-	ENSOCUG00000024778	54.2169	4.87652	103.557	21.2359	4.40843	4.49007	8.95952e-05	0.0139937	4.04772	Uncharacterized protein [Source:UniProtKB/TrEMBL;Acc:G1U771]	#		ENSOCUG00000000321	298.668	308.196	289.14	0.938169	-0.0920796	8.22167	0.870097	1	0.0604323
ITGA11	ENSOCUG00000017726	2377.39	3611.55	1143.23	0.316549	-1.6595	10.9887	0.000182653	0.0252751	3.73837	integrin, alpha 11 [Source:HGNC Symbol;Acc:HGNC:6136]	#	COL28A1	ENSOCUG00000024805	14.8421	0.975305	28.709	29.4359	4.8795	2.40368	0.0330322	1	1.48106	collagen, type XXVIII, alpha 1 [Source:HGNC Symbol;Acc:HGNC:22442]	#		ENSOCUG00000000322	190.96	190.184	191.735	1.00815	0.0117139	7.57711	0.994378	1	0.00244838
MAB21L1	ENSOCUG00000017845	109.772	177.505	42.0381	0.236827	-2.07809	6.43267	0.00476042	0.335249	2.32235	mab-21-like 1 (C. elegans) [Source:HGNC Symbol;Acc:HGNC:6757]	#	-	ENSOCUG00000024819	80.6127	35.111	126.114	3.59188	1.84474	6.05622	0.0232556	0.943076	1.63347	-	#		ENSOCUG00000000323	668.146	713.923	622.37	0.87176	-0.197997	9.38063	0.678003	1	0.168768
-	ENSOCUG00000021238	59.6436	113.135	6.15192	0.0543767	-4.20087	4.72147	8.18681e-05	0.0133141	4.08689	Uncharacterized protein [Source:UniProtKB/TrEMBL;Acc:G1TGT6]	#	-	ENSOCUG00000025191	1305.91	853.392	1758.42	2.06051	1.043	10.2586	0.0205163	0.867509	1.6879	Uncharacterized protein [Source:UniProtKB/TrEMBL;Acc:G1U1V1]	#		ENSOCUG00000000324	377.005	352.085	401.926	1.14156	0.191005	8.55528	0.714219	1	0.146168
-	ENSOCUG00000021436	70.6721	122.888	18.4558	0.150183	-2.73521	5.5736	0.00226014	0.188644	2.64586	Uncharacterized protein [Source:UniProtKB/TrEMBL;Acc:G1U6C9]	#	IVL	ENSOCUG00000025593	2565.36	1619.01	3511.72	2.16906	1.11707	11.2194	0.0104041	0.56015	1.9828	involucrin [Source:HGNC Symbol;Acc:HGNC:6187]	#		ENSOCUG00000000325	124.776	112.16	137.393	1.22497	0.292749	6.95579	0.673067	1	0.171942
FOS	ENSOCUG00000021506	8811.38	13364.6	4258.16	0.318614	-1.65012	12.8811	0.000126941	0.0185417	3.8964	FBJ murine osteosarcoma viral oncogene homolog [Source:HGNC Symbol;Acc:HGNC:3796]	#	CCDC64	ENSOCUG00000025898	180.907	102.407	259.406	2.53309	1.3409	7.34862	0.0292566	1	1.53378	coiled-coil domain containing 64 [Source:HGNC Symbol;Acc:HGNC:28095]	#		ENSOCUG00000000326	214.592	228.221	200.963	0.880561	-0.183505	7.74254	0.758015	1	0.120322
FGF23	ENSOCUG00000021580	40.8003	68.2713	13.3292	0.195238	-2.35669	4.91486	0.0336893	1	1.47251	fibroblast growth factor 23 [Source:HGNC Symbol;Acc:HGNC:3680]	#	-	ENSOCUG00000025918	65.633	19.5061	111.76	5.72949	2.51841	5.54506	0.00559509	0.369709	2.25219	-	#		ENSOCUG00000000328	578.618	526.665	630.572	1.19729	0.259777	9.17063	0.591917	1	0.227739
LCTL	ENSOCUG00000021771	20.0188	39.0122	1.02532	0.0262821	-5.24978	2.66096	0.00919024	0.517772	2.03667	lactase-like [Source:HGNC Symbol;Acc:HGNC:15583]	#	CELSR3	ENSOCUG00000025952	20.4814	0.975305	39.9875	41	5.35755	2.6427	0.00727833	0.441256	2.13797	cadherin, EGF LAG seven-pass G-type receptor 3 [Source:HGNC Symbol;Acc:HGNC:3230]	#		ENSOCUG00000000329	1017.61	920.688	1114.52	1.21053	0.275643	9.98439	0.545108	1	0.263517
-	ENSOCUG00000022069	90.0156	148.246	31.7849	0.214406	-2.22158	6.10106	0.0051816	0.356942	2.28554	Uncharacterized protein [Source:UniProtKB/TrEMBL;Acc:G1TEW3]	#	-	ENSOCUG00000026281	509.409	326.727	692.091	2.11825	1.08288	8.89338	0.0287847	1	1.54084	Uncharacterized protein [Source:UniProtKB/TrEMBL;Acc:G1U2J1]	#		ENSOCUG00000000331	103.557	119.962	87.1522	0.726496	-0.460974	6.67595	0.52849	1	0.276963
ACAN	ENSOCUG00000022093	1132.17	1651.19	613.142	0.371333	-1.42921	9.97468	0.00184894	0.162945	2.73308	aggrecan [Source:HGNC Symbol;Acc:HGNC:319]	#	-	ENSOCUG00000026362	112.36	56.5677	168.153	2.97259	1.57172	6.60777	0.0279941	1	1.55293	Uncharacterized protein [Source:UniProtKB/TrEMBL;Acc:G1TFH4]	#		ENSOCUG00000000333	14.8046	22.432	7.17724	0.319955	-1.64406	3.66546	0.37126	1	0.430322
-	ENSOCUG00000022112	142.92	224.32	61.5192	0.274247	-1.86645	6.87619	0.00536562	0.361499	2.27038	Uncharacterized protein [Source:UniProtKB/TrEMBL;Acc:G1U7V8]	#	-	ENSOCUG00000026595	91.266	19.5061	163.026	8.35769	3.0631	5.81741	0.000210776	0.0277676	3.67618	-	#		ENSOCUG00000000334	637.687	662.232	613.142	0.925871	-0.111116	9.31563	0.818393	1	0.087038
-	ENSOCUG00000022371	524.026	736.355	311.697	0.423298	-1.24026	8.90413	0.0122693	0.615826	1.91118	Uncharacterized protein [Source:UniProtKB/TrEMBL;Acc:G1T940]	#	-	ENSOCUG00000026629	12863.7	8537.82	17189.5	2.01334	1.00959	13.5644	0.0168337	0.778743	1.77382	Galectin [Source:UniProtKB/TrEMBL;Acc:G1TMP9]	#		ENSOCUG00000000336	210.478	248.703	172.254	0.692609	-0.529886	7.69334	0.365776	1	0.436785
-	ENSOCUG00000022491	173.304	318.925	27.6837	0.0868031	-3.52611	6.55402	3.56825e-07	0.000108248	6.44754	Uncharacterized protein [Source:UniProtKB/TrEMBL;Acc:G1TVI2]	#	5_8S_rRNA	ENSOCUG00000026713	42.9134	5.85183	79.975	13.6667	3.77259	4.43518	0.00147219	0.135063	2.83204	5.8S ribosomal RNA [Source:RFAM;Acc:RF00002]	#		ENSOCUG00000000339	230.272	216.518	244.026	1.12705	0.172552	7.84462	0.76819	1	0.114531
OPN	ENSOCUG00000022536	362.788	646.627	78.9497	0.122095	-3.03393	7.81983	7.9396e-08	2.60932e-05	7.1002	Oryctolagus cuniculus secreted phosphoprotein 1 (SPP1), mRNA. [Source:RefSeq mRNA;Acc:NM_001082194]	#	BCAM	ENSOCUG00000026791	3054.57	1694.1	4415.03	2.60611	1.3819	11.4173	0.00153435	0.139106	2.81407	basal cell adhesion molecule (Lutheran blood group) [Source:HGNC Symbol;Acc:HGNC:6722]	#		ENSOCUG00000000343	436.486	491.554	381.419	0.775946	-0.365971	8.75822	0.468024	1	0.329732
-	ENSOCUG00000022742	1091.5	1517.57	665.433	0.438485	-1.1894	9.97285	0.00933615	0.52064	2.02983	Uncharacterized protein [Source:UniProtKB/TrEMBL;Acc:G1TJH8]	#	SPRR3	ENSOCUG00000026830	2640.58	1544.88	3736.27	2.41848	1.2741	11.2303	0.00355827	0.267294	2.44876	small proline-rich protein 3 [Source:HGNC Symbol;Acc:HGNC:11268]	#		ENSOCUG00000000344	122.113	116.061	128.165	1.10429	0.143116	6.9303	0.844698	1	0.0732987
FCER1A	ENSOCUG00000022947	47.1647	79.975	14.3545	0.179487	-2.47805	5.08245	0.0178443	0.804466	1.7485	Fc fragment of IgE, high affinity I, receptor for; alpha polypeptide [Source:HGNC Symbol;Acc:HGNC:3609]	#	CHI3L1	ENSOCUG00000026988	333.104	164.827	501.382	3.04188	1.60496	8.16729	0.00289118	0.23162	2.53893	chitinase 3-like 1 (cartilage glycoprotein-39) [Source:HGNC Symbol;Acc:HGNC:1932]	#		ENSOCUG00000000345	3.05095	0.975305	5.1266	5.25641	2.39408	1.16096	0.708261	1	0.149807
PHLDA1	ENSOCUG00000022950	42.8009	70.2219	15.3798	0.219017	-2.19088	5.03841	0.0418674	1	1.37812	pleckstrin homology-like domain, family A, member 1 [Source:HGNC Symbol;Acc:HGNC:8933]	#	HIST1H2BC	ENSOCUG00000027003	145.033	41.9381	248.128	5.91652	2.56475	6.67256	0.000193424	0.026304	3.71349	histone cluster 1, H2bc [Source:HGNC Symbol;Acc:HGNC:4757]	#		ENSOCUG00000000346	309.022	264.308	353.736	1.33835	0.420453	8.2563	0.433532	1	0.362979
-	ENSOCUG00000022984	384.058	516.912	251.204	0.48597	-1.04106	8.49324	0.0442932	1	1.35366	Uncharacterized protein [Source:UniProtKB/TrEMBL;Acc:G1T3Y1]	#	-	ENSOCUG00000027082	281.35	3.90122	558.8	143.237	7.16226	5.54506	8.1533e-19	8.57455e-16	18.0887	Uncharacterized protein [Source:UniProtKB/TrEMBL;Acc:G1TRV3]	#		ENSOCUG00000000347	846.252	685.639	1006.86	1.4685	0.554348	9.69848	0.231237	1	0.635942
-	ENSOCUG00000023004	34.3607	59.4936	9.22788	0.155107	-2.68866	4.55033	0.0282495	1	1.54899	Uncharacterized protein [Source:UniProtKB/TrEMBL;Acc:G1U9D2]	#	-	ENSOCUG00000027112	8147.13	5300.78	10993.5	2.07394	1.05237	12.8982	0.0131874	0.652136	1.87984	Uncharacterized protein [Source:UniProtKB/TrEMBL;Acc:G1U7L1]	#		ENSOCUG00000000348	470.772	354.036	587.509	1.65946	0.730715	8.83311	0.142506	1	0.846167
FOSB	ENSOCUG00000023019	847.652	1510.75	184.558	0.122163	-3.03312	9.04449	1.4503e-09	6.72896e-07	8.83854	FBJ murine osteosarcoma viral oncogene homolog B [Source:HGNC Symbol;Acc:HGNC:3797]	#	FCGBP	ENSOCUG00000027210	51.5036	10.7284	92.2788	8.6014	3.10457	4.97564	0.00289249	0.23162	2.53873	Fc fragment of IgG binding protein [Source:HGNC Symbol;Acc:HGNC:13572]	#		ENSOCUG00000000349	27.4836	7.80244	47.1647	6.04487	2.59571	4.26178	0.0555459	1	1.25535
-	ENSOCUG00000023107	53.6543	86.8021	20.5064	0.236243	-2.08166	5.39883	0.031783	1	1.4978	Uncharacterized protein [Source:UniProtKB/TrEMBL;Acc:G1SEE8]	#	LAMC3	ENSOCUG00000027230	1068.27	584.208	1552.34	2.65716	1.40989	9.89528	0.002213	0.187047	2.65502	laminin, gamma 3 [Source:HGNC Symbol;Acc:HGNC:6494]	#		ENSOCUG00000000353	232.035	247.727	216.343	0.873309	-0.195436	7.85489	0.736976	1	0.132547
-	ENSOCUG00000023274	2327.7	4629.77	25.633	0.00553656	-7.49679	8.42833	7.44808e-36	4.14253e-32	35.128	Uncharacterized protein [Source:UniProtKB/TrEMBL;Acc:G1SE76]	#	PIWIL1	ENSOCUG00000027444	43.3761	7.80244	78.9497	10.1186	3.33894	4.63339	0.003487	0.264459	2.45755	piwi-like RNA-mediated gene silencing 1 [Source:HGNC Symbol;Acc:HGNC:9007]	#		ENSOCUG00000000354	174.717	163.851	185.583	1.13263	0.179678	7.44608	0.776667	1	0.109765
-	ENSOCUG00000023450	16.1175	31.2098	1.02532	0.0328526	-4.92785	2.5	0.025642	1	1.59105	Uncharacterized protein [Source:UniProtKB/TrEMBL;Acc:G1SZZ4]	#	PSORS1C2	ENSOCUG00000027593	95.2048	45.8393	144.57	3.15385	1.65711	6.34707	0.029137	1	1.53555	psoriasis susceptibility 1 candidate 2 [Source:HGNC Symbol;Acc:HGNC:17199]	#		ENSOCUG00000000355	68.2463	57.543	78.9497	1.37201	0.456293	6.07471	0.596993	1	0.224031
-	ENSOCUG00000023566	176.455	315.999	36.9115	0.116809	-3.09778	6.75489	3.88422e-06	0.000928387	5.4107	Uncharacterized protein [Source:UniProtKB/TrEMBL;Acc:G1TKP3]	#	-	ENSOCUG00000027648	1207.58	689.541	1725.61	2.50256	1.3234	10.0912	0.00366801	0.272938	2.43557	Uncharacterized protein [Source:UniProtKB/TrEMBL;Acc:G1SE76]	#		ENSOCUG00000000356	594.848	613.467	576.23	0.939301	-0.0903401	9.21567	0.854086	1	0.0684985
APOD	ENSOCUG00000023599	5247.5	8500.76	1994.25	0.234597	-2.09175	12.0075	2.00983e-06	0.000511373	5.69684	apolipoprotein D precursor [Source:RefSeq peptide;Acc:NP_001075727]	#	MED10	ENSOCUG00000027806	96.7427	45.8393	147.646	3.22095	1.68749	6.36226	0.0256157	1	1.59149	mediator complex subunit 10 [Source:HGNC Symbol;Acc:HGNC:28760]	#		ENSOCUG00000000357	203.939	243.826	164.051	0.672821	-0.571706	7.64386	0.332913	1	0.47767
ROR1	ENSOCUG00000023790	69.4342	111.185	27.6837	0.248988	-2.00585	5.79389	0.0209418	0.88095	1.67899	receptor tyrosine kinase-like orphan receptor 1 [Source:HGNC Symbol;Acc:HGNC:10256]	#	-	ENSOCUG00000027948	761.838	438.887	1084.79	2.47168	1.30549	9.43045	0.00586959	0.38034	2.23139	Uncharacterized protein [Source:UniProtKB/TrEMBL;Acc:G1TWD4]	#		ENSOCUG00000000358	779.344	795.849	762.838	0.958522	-0.0611167	9.60579	0.898332	1	0.0465631
CCDC8	ENSOCUG00000023898	552.673	878.75	226.596	0.257862	-1.95533	8.80164	0.000100575	0.0155546	3.99751	coiled-coil domain containing 8 [Source:HGNC Symbol;Acc:HGNC:25367]	#	MT-ND2	ENSOCUG00000029090	913.798	570.553	1257.04	2.2032	1.1396	9.72602	0.0140006	0.683777	1.85385	NADH-ubiquinone oxidoreductase chain 2 [Source:UniProtKB/Swiss-Prot;Acc:O79428]	#		ENSOCUG00000000359	1490.22	1422.97	1557.46	1.09452	0.130292	10.5398	0.769455	1	0.113817
-	ENSOCUG00000024108	364.564	497.405	231.722	0.465862	-1.10202	8.40727	0.035122	1	1.45442	Uncharacterized protein [Source:UniProtKB/TrEMBL;Acc:G1U0J1]	#	KRT73	ENSOCUG00000029195	71.985	11.7037	132.266	11.3013	3.49841	5.29809	0.00017281	0.0241245	3.76243	keratin 73 [Source:HGNC Symbol;Acc:HGNC:28928]	#		ENSOCUG00000000360	81.0503	118.012	44.0888	0.373596	-1.42045	6.17256	0.0762594	1	1.11771
FBXO17	ENSOCUG00000024196	143.17	214.567	71.7724	0.334499	-1.57993	6.95532	0.0171866	0.787809	1.76481	F-box protein 17 [Source:HGNC Symbol;Acc:HGNC:18754]	#	KRT71	ENSOCUG00000029234	748.459	0.975305	1495.94	1533.82	10.5829	5.25538	1.01371e-33	3.99783e-30	32.9941	keratin 71 [Source:HGNC Symbol;Acc:HGNC:28927]	#		ENSOCUG00000000364	446.164	434.011	458.318	1.05601	0.0786193	8.8009	0.879499	1	0.0557649
NEXN	ENSOCUG00000024272	77.4367	118.987	35.8862	0.301597	-1.7293	6.03001	0.0356968	1	1.44737	nexilin (F actin binding protein) [Source:HGNC Symbol;Acc:HGNC:29557]	#	-	ENSOCUG00000029237	758.562	6.82713	1510.3	221.22	7.78934	6.66595	2.67248e-29	7.0264e-26	28.5731	Uncharacterized protein [Source:UniProtKB/TrEMBL;Acc:U3KPQ7]	#		ENSOCUG00000000365	121.55	118.012	125.089	1.05997	0.0840239	6.9248	0.914381	1	0.0388728
MMP11	ENSOCUG00000024308	1362.23	1895.99	828.459	0.436953	-1.19445	10.2915	0.00801618	0.470094	2.09603	matrix metallopeptidase 11 (stromelysin 3) [Source:HGNC Symbol;Acc:HGNC:7157]	#	KRT14	ENSOCUG00000029244	28616.3	15750.2	41482.4	2.63377	1.39713	14.6416	0.000991471	0.0989902	3.00372	keratin 14 [Source:HGNC Symbol;Acc:HGNC:6416]	#		ENSOCUG00000000367	154.086	168.728	139.444	0.826441	-0.275016	7.26105	0.671365	1	0.173042
HIC1	ENSOCUG00000024363	58.6058	93.6293	23.5824	0.25187	-1.98925	5.55426	0.0324699	1	1.48852	hypermethylated in cancer 1 [Source:HGNC Symbol;Acc:HGNC:4909]	#	RARRES1	ENSOCUG00000029263	105.37	29.2591	181.482	6.20256	2.63286	6.18725	0.000586994	0.0652101	3.23137	retinoic acid receptor responder (tazarotene induced) 1 [Source:HGNC Symbol;Acc:HGNC:9867]	#		ENSOCUG00000000368	50.9034	74.1232	27.6837	0.373482	-1.42089	5.50141	0.142534	1	0.846082
NAB2	ENSOCUG00000024399	152.485	231.147	73.8231	0.319377	-1.64667	7.02933	0.0115753	0.59398	1.93647	NGFI-A binding protein 2 (EGR1 binding protein 2) [Source:HGNC Symbol;Acc:HGNC:7627]	#	-	ENSOCUG00000029357	5029.43	1290.33	8768.54	6.79559	2.7646	11.7158	9.73151e-10	4.95208e-07	9.01182	Uncharacterized protein [Source:UniProtKB/TrEMBL;Acc:U3KPP1]	#		ENSOCUG00000000371	210.178	180.431	239.925	1.32973	0.411133	7.70087	0.483907	1	0.315238
COL8A1	ENSOCUG00000024465	7107.13	11671.5	2542.79	0.217864	-2.1985	12.4114	5.72503e-07	0.000167245	6.24222	Oryctolagus cuniculus collagen, type VIII, alpha 1 (COL8A1), mRNA. [Source:RefSeq mRNA;Acc:NM_001082666]	#	KRT17	ENSOCUG00000029569	331.904	11.7037	652.104	55.7179	5.80007	6.44892	5.26077e-17	5.18679e-14	16.279	keratin 17 [Source:HGNC Symbol;Acc:HGNC:6427]	#		ENSOCUG00000000374	155.399	177.505	133.292	0.750916	-0.413277	7.26508	0.518315	1	0.285406
-	ENSOCUG00000024524	689.328	967.502	411.154	0.424964	-1.23459	9.30083	0.00985615	0.536141	2.00629	-	#	SERPINA9	ENSOCUG00000029657	45.2016	16.5802	73.8231	4.45249	2.15461	5.12869	0.0394179	1	1.40431	serpin peptidase inhibitor, clade A (alpha-1 antiproteinase, antitrypsin), member 9 [Source:HGNC Symbol;Acc:HGNC:15995]	#		ENSOCUG00000000375	29.8843	34.1357	25.633	0.750916	-0.413277	4.88657	0.754893	1	0.122115
-	ENSOCUG00000024788	387.033	520.813	253.254	0.486267	-1.04018	8.50453	0.0441854	1	1.35472	-	#	KRT1	ENSOCUG00000029663	107122	67282.4	146962	2.18426	1.12715	16.6015	0.00735672	0.442948	2.13332	keratin 1 [Source:HGNC Symbol;Acc:HGNC:6412]	#		ENSOCUG00000000377	288.615	260.406	316.824	1.21665	0.282917	8.16608	0.605149	1	0.218138
-	ENSOCUG00000025019	59.056	116.061	2.05064	0.0176686	-5.82267	3.94741	2.8155e-06	0.000683299	5.55045	Uncharacterized protein [Source:UniProtKB/TrEMBL;Acc:G1SQJ9]	#	-	ENSOCUG00000000308	12.8165	0	25.633	Inf	Inf	#NUM!	0.0211697	0.885815	1.67429	-	#		ENSOCUG00000000381	252.454	271.135	233.773	0.862203	-0.213901	7.97592	0.706494	1	0.150892
-	ENSOCUG00000025053	25.9456	47.7899	4.10128	0.0858189	-3.54256	3.80735	0.0178487	0.804466	1.74839	Uncharacterized protein [Source:UniProtKB/TrEMBL;Acc:G1TP67]	#	KRTAP8-1	ENSOCUG00000001632	49.728	0	99.4561	Inf	Inf	#NUM!	7.16125e-07	0.000205398	6.14501	keratin associated protein 8-1 [Source:HGNC Symbol;Acc:HGNC:18935]	#		ENSOCUG00000000382	559.337	558.85	559.825	1.00175	0.0025156	9.12757	1	1	0
-	ENSOCUG00000025065	42.7259	73.1479	12.3038	0.168205	-2.57171	4.90689	0.019319	0.83495	1.71402	-	#	KRT85	ENSOCUG00000002607	124.576	0	249.153	Inf	Inf	#NUM!	1.44805e-13	1.20226e-10	12.8392	keratin 85 [Source:HGNC Symbol;Acc:HGNC:6462]	#		ENSOCUG00000000383	1390.62	1768.23	1013.02	0.572899	-0.803646	10.3863	0.0719275	1	1.14311
RPL31	ENSOCUG00000025109	3479.79	5524.13	1435.45	0.259851	-1.94424	11.4594	1.0892e-05	0.00235372	4.96289	ribosomal protein L31 [Source:HGNC Symbol;Acc:HGNC:10334]	#	-	ENSOCUG00000005594	28.709	0	57.4179	Inf	Inf	#NUM!	0.000188152	0.0258096	3.72549	Uncharacterized protein [Source:UniProtKB/TrEMBL;Acc:G1TSA5]	#		ENSOCUG00000000384	9.34042	15.6049	3.07596	0.197115	-2.34289	2.79248	0.351188	1	0.454461
HSP70-1	ENSOCUG00000025112	49.728	79.975	19.4811	0.24359	-2.03747	5.30274	0.0415918	1	1.38099	Uncharacterized protein [Source:UniProtKB/TrEMBL;Acc:G1TRC0]	#	-	ENSOCUG00000006486	99.4561	0	198.912	Inf	Inf	#NUM!	1.38019e-11	8.70901e-09	10.8601	Uncharacterized protein [Source:UniProtKB/TrEMBL;Acc:G1SR38]	#		ENSOCUG00000000385	157.937	178.481	137.393	0.769791	-0.377461	7.29089	0.553965	1	0.256518
-	ENSOCUG00000025374	1773.2	3542.31	4.10128	0.0011578	-9.7544	6.91327	1.25749e-41	1.98368e-37	40.9005	Uncharacterized protein [Source:UniProtKB/TrEMBL;Acc:G1TTU4]	#	FABP9	ENSOCUG00000007448	106.633	0	213.267	Inf	Inf	#NUM!	3.55789e-12	2.44025e-09	11.4488	fatty acid binding protein 9, testis [Source:HGNC Symbol;Acc:HGNC:3563]	#		ENSOCUG00000000386	72.7602	61.4442	84.0763	1.36834	0.452422	6.16742	0.590197	1	0.229003
HINT3	ENSOCUG00000025844	60.3814	104.358	16.4051	0.157201	-2.66932	5.37073	0.00500678	0.347938	2.30044	histidine triad nucleotide binding protein 3 [Source:HGNC Symbol;Acc:HGNC:18468]	#	KRT72	ENSOCUG00000008097	46.1394	0	92.2788	Inf	Inf	#NUM!	1.76572e-06	0.000456626	5.75308	keratin 72 [Source:HGNC Symbol;Acc:HGNC:28932]	#		ENSOCUG00000000387	2.00063	1.95061	2.05064	1.05128	0.0721498	1	1	1	0
KCTD11	ENSOCUG00000026228	157.287	243.826	70.7471	0.290154	-1.78511	7.03715	0.00599119	0.383278	2.22249	potassium channel tetramerization domain containing 11 [Source:HGNC Symbol;Acc:HGNC:21302]	#	-	ENSOCUG00000008528	10.7659	0	21.5317	Inf	Inf	#NUM!	0.0403353	1	1.39431	Uncharacterized protein [Source:UniProtKB/TrEMBL;Acc:G1SVC1]	#		ENSOCUG00000000388	57.643	71.1973	44.0888	0.619248	-0.69141	5.80804	0.450725	1	0.346088
-	ENSOCUG00000026651	9109	15833.1	2384.9	0.150627	-2.73095	12.5852	1.04836e-09	5.1681e-07	8.97949	Uncharacterized protein [Source:UniProtKB/TrEMBL;Acc:G1THZ6]	#	CFAP43	ENSOCUG00000008688	19.4811	0	38.9622	Inf	Inf	#NUM!	0.00275501	0.224022	2.55988	cilia and flagella associated protein 43 [Source:HGNC Symbol;Acc:HGNC:26684]	#		ENSOCUG00000000391	14.1544	7.80244	20.5064	2.62821	1.39408	3.66096	0.459047	1	0.338143
-	ENSOCUG00000026745	45.7018	77.0491	14.3545	0.186303	-2.42428	5.05557	0.0219161	0.901666	1.65924	Uncharacterized protein [Source:UniProtKB/TrEMBL;Acc:G1U289]	#	KRT25	ENSOCUG00000008992	794.623	0	1589.25	Inf	Inf	#NUM!	7.87804e-36	4.14253e-32	35.1036	keratin 25 [Source:HGNC Symbol;Acc:HGNC:30839]	#		ENSOCUG00000000392	97.4179	99.4811	95.3548	0.958522	-0.0611167	6.60579	0.948864	1	0.0227962
-	ENSOCUG00000026786	638.675	1043.58	233.773	0.224012	-2.15836	8.94814	1.42942e-05	0.00292846	4.84484	Uncharacterized protein [Source:UniProtKB/TrEMBL;Acc:G1TU60]	#	KRT26	ENSOCUG00000008999	22.0444	0	44.0888	Inf	Inf	#NUM!	0.00128656	0.120806	2.89057	keratin 26 [Source:HGNC Symbol;Acc:HGNC:30840]	#		ENSOCUG00000000397	152.423	173.604	131.241	0.755978	-0.403584	7.23787	0.530807	1	0.275064
-	ENSOCUG00000026795	252.942	432.06	73.8231	0.170863	-2.54909	7.48054	1.77349e-05	0.00354137	4.75117	Uncharacterized protein [Source:UniProtKB/TrEMBL;Acc:G1TMH2]	#	-	ENSOCUG00000009003	174.817	0	349.634	Inf	Inf	#NUM!	6.03691e-17	5.60189e-14	16.2192	-	#		ENSOCUG00000000398	4.07627	0.975305	7.17724	7.35897	2.8795	1.40368	0.55555	1	0.255277
CPZ	ENSOCUG00000026821	1239.21	1735.07	743.357	0.428431	-1.22286	10.1493	0.00702669	0.429636	2.15325	carboxypeptidase Z [Source:HGNC Symbol;Acc:HGNC:2333]	#	SLC7A10	ENSOCUG00000009443	10.2532	0	20.5064	Inf	Inf	#NUM!	0.0474466	1	1.3238	solute carrier family 7 (neutral amino acid transporter light chain, asc system), member 10 [Source:HGNC Symbol;Acc:HGNC:11058]	#		ENSOCUG00000000401	32.4726	33.1604	31.7849	0.958522	-0.0611167	5.02083	0.988186	1	0.00516145
-	ENSOCUG00000027057	48.09	83.8762	12.3038	0.146691	-2.76915	5.00561	0.00865697	0.500233	2.06263	Uncharacterized protein [Source:UniProtKB/TrEMBL;Acc:G1TUU8]	#	KRTAP11-1	ENSOCUG00000012040	59.9812	0	119.962	Inf	Inf	#NUM!	6.00293e-08	2.05861e-05	7.22164	keratin associated protein 11-1 [Source:HGNC Symbol;Acc:HGNC:18922]	#		ENSOCUG00000000403	984.32	699.294	1269.35	1.81518	0.860116	9.87981	0.0605822	1	1.21766
-	ENSOCUG00000027099	590.972	924.589	257.355	0.278346	-1.84505	8.93014	0.000201335	0.0269158	3.69608	Uncharacterized protein [Source:UniProtKB/TrEMBL;Acc:G1U945]	#	-	ENSOCUG00000013096	37.4242	0	74.8484	Inf	Inf	#NUM!	1.71372e-05	0.00346589	4.76606	Uncharacterized protein [Source:UniProtKB/TrEMBL;Acc:G1T4Q6]	#		ENSOCUG00000000404	578.331	597.862	558.8	0.934663	-0.0974811	9.17493	0.843044	1	0.0741498
TMPRSS5	ENSOCUG00000027156	42.7008	74.1232	11.2785	0.152159	-2.71635	4.85368	0.0143107	0.694622	1.84434	transmembrane protease, serine 5 [Source:HGNC Symbol;Acc:HGNC:14908]	#	-	ENSOCUG00000014195	47.1647	0	94.3295	Inf	Inf	#NUM!	1.36178e-06	0.000364103	5.86589	Uncharacterized protein [Source:UniProtKB/TrEMBL;Acc:G1T6W5]	#		ENSOCUG00000000405	103.732	113.135	94.3295	0.833775	-0.262269	6.69077	0.725517	1	0.139353
IGJ	ENSOCUG00000027219	100.781	188.234	13.3292	0.0708117	-3.81987	5.64645	5.76246e-06	0.00131743	5.23939	immunoglobulin J polypeptide, linker protein for immunoglobulin alpha and mu polypeptides [Source:HGNC Symbol;Acc:HGNC:5713]	#	-	ENSOCUG00000014311	51.266	0	102.532	Inf	Inf	#NUM!	4.89199e-07	0.000145606	6.31051	Uncharacterized protein [Source:UniProtKB/TrEMBL;Acc:G1T754]	#		ENSOCUG00000000406	133.542	110.209	156.874	1.42342	0.509359	7.03878	0.446	1	0.350665
-	ENSOCUG00000027223	489.14	977.255	1.02532	0.00104918	-9.89652	4.98433	9.1417e-28	2.06015e-24	27.039	Uncharacterized protein [Source:UniProtKB/TrEMBL;Acc:G1TRN9]	#	KRT28	ENSOCUG00000015132	69.2091	0	138.418	Inf	Inf	#NUM!	7.24694e-09	2.93129e-06	8.13985	keratin 28 [Source:HGNC Symbol;Acc:HGNC:30842]	#		ENSOCUG00000000408	375.655	404.752	346.558	0.856225	-0.223938	8.54892	0.667055	1	0.175838
-	ENSOCUG00000027285	55.9675	96.5552	15.3798	0.159285	-2.65032	5.26812	0.00688705	0.422736	2.16197	Uncharacterized protein [Source:UniProtKB/TrEMBL;Acc:G1SCS6]	#	KRT39	ENSOCUG00000015593	12.3038	0	24.6077	Inf	Inf	#NUM!	0.0248534	0.987561	1.60461	keratin 39 [Source:HGNC Symbol;Acc:HGNC:32971]	#		ENSOCUG00000000409	53320.9	56458.4	50183.3	0.888853	-0.169983	15.6999	0.682795	1	0.16571
-	ENSOCUG00000027338	35.161	68.2713	2.05064	0.0300366	-5.05713	3.56464	0.000574828	0.0643115	3.24046	Uncharacterized protein [Source:UniProtKB/TrEMBL;Acc:G1TIU0]	#	KRTAP3-1	ENSOCUG00000015615	70.7471	0	141.494	Inf	Inf	#NUM!	5.14623e-09	2.25505e-06	8.28851	keratin associated protein 3-1 [Source:HGNC Symbol;Acc:HGNC:16778]	#		ENSOCUG00000000410	312.198	260.406	363.989	1.39777	0.483129	8.26619	0.366789	1	0.435584
-	ENSOCUG00000027394	1815.82	3559.86	71.7724	0.0201616	-5.63225	8.98148	4.23179e-25	8.34457e-22	24.3735	Uncharacterized protein [Source:UniProtKB/TrEMBL;Acc:G1TRK9]	#	KRTAP7-1	ENSOCUG00000021144	62.0319	0	124.064	Inf	Inf	#NUM!	3.71813e-08	1.33304e-05	7.42968	keratin associated protein 7-1 (gene/pseudogene) [Source:HGNC Symbol;Acc:HGNC:18934]	#		ENSOCUG00000000412	139.819	145.32	134.317	0.924282	-0.113596	7.1263	0.872483	1	0.0592433
PLAUR	ENSOCUG00000027400	767.59	1054.3	480.875	0.456107	-1.13256	9.4758	0.0163523	0.76319	1.78642	plasminogen activator, urokinase receptor [Source:HGNC Symbol;Acc:HGNC:9053]	#	-	ENSOCUG00000021675	18.4558	0	36.9115	Inf	Inf	#NUM!	0.00374913	0.277664	2.42607	Uncharacterized protein [Source:UniProtKB/TrEMBL;Acc:G1TFG3]	#		ENSOCUG00000000416	383.57	355.986	411.154	1.15497	0.207856	8.57961	0.688838	1	0.161883
PEG10	ENSOCUG00000027535	39.7249	70.2219	9.22788	0.13141	-2.92785	4.66993	0.0117249	0.598576	1.93089	paternally expressed 10 [Source:HGNC Symbol;Acc:HGNC:14005]	#	-	ENSOCUG00000022000	13.8418	0	27.6837	Inf	Inf	#NUM!	0.0153826	0.734087	1.81297	Uncharacterized protein [Source:UniProtKB/TrEMBL;Acc:G1U4A4]	#		ENSOCUG00000000418	5.90184	9.75305	2.05064	0.210256	-2.24978	2.16096	0.520833	1	0.283301
-	ENSOCUG00000027838	501.607	671.01	332.204	0.495081	-1.01426	8.88306	0.0408155	1	1.38917	Uncharacterized protein [Source:UniProtKB/TrEMBL;Acc:G1TIK3]	#	-	ENSOCUG00000023053	10.7659	0	21.5317	Inf	Inf	#NUM!	0.0403353	1	1.39431	Uncharacterized protein [Source:UniProtKB/TrEMBL;Acc:G1TKG6]	#		ENSOCUG00000000422	9.87809	14.6296	5.1266	0.350427	-1.51281	3.11441	0.525882	1	0.279111
-	ENSOCUG00000028050	139.494	277.962	1.02532	0.00368871	-8.08267	4.07741	2.35471e-13	1.85728e-10	12.6281	Uncharacterized protein [Source:UniProtKB/TrEMBL;Acc:G1TPX4]	#	KRTAP16-1	ENSOCUG00000024522	23.0697	0	46.1394	Inf	Inf	#NUM!	0.000952062	0.0968374	3.02133	keratin associated protein 16-1 [Source:HGNC Symbol;Acc:HGNC:18916]	#		ENSOCUG00000000425	446.515	460.344	432.685	0.939917	-0.0893941	8.80187	0.862438	1	0.0642719
ASPN	ENSOCUG00000028053	458.643	667.109	250.178	0.375019	-1.41497	8.67429	0.0052873	0.36107	2.27677	asporin [Source:HGNC Symbol;Acc:HGNC:14872]	#	-	ENSOCUG00000024540	29.2216	0	58.4433	Inf	Inf	#NUM!	0.000162828	0.0229341	3.78827	Uncharacterized protein [Source:UniProtKB/TrEMBL;Acc:G1TP66]	#		ENSOCUG00000000426	91.6161	85.8268	97.4054	1.13491	0.182574	6.51464	0.820969	1	0.0856735
-	ENSOCUG00000028066	36.1613	69.2466	3.07596	0.0444204	-4.49263	3.86735	0.00107352	0.103895	2.96919	Uncharacterized protein [Source:UniProtKB/TrEMBL;Acc:G1TPR4]	#	-	ENSOCUG00000025985	25.1204	0	50.2407	Inf	Inf	#NUM!	0.000524433	0.0595175	3.28031	Uncharacterized protein [Source:UniProtKB/TrEMBL;Acc:G1TJG8]	#		ENSOCUG00000000427	8.05252	5.85183	10.2532	1.75214	0.809115	2.95345	0.7882	1	0.103364
PRC1	ENSOCUG00000028094	243.964	342.332	145.596	0.425305	-1.23343	7.80254	0.030356	1	1.51776	protein regulator of cytokinesis 1 [Source:HGNC Symbol;Acc:HGNC:9341]	#	-	ENSOCUG00000026324	69.2091	0	138.418	Inf	Inf	#NUM!	7.24694e-09	2.93129e-06	8.13985	Uncharacterized protein [Source:UniProtKB/TrEMBL;Acc:G1U5J7]	#		ENSOCUG00000000429	257.906	298.443	217.368	0.728339	-0.457318	7.99265	0.412657	1	0.384411
-	ENSOCUG00000028173	44.7015	76.0738	13.3292	0.175214	-2.51281	4.99292	0.0192469	0.83495	1.71564	Uncharacterized protein [Source:UniProtKB/TrEMBL;Acc:G1THD3]	#	-	ENSOCUG00000028130	25.1204	0	50.2407	Inf	Inf	#NUM!	0.000524433	0.0595175	3.28031	Uncharacterized protein [Source:UniProtKB/TrEMBL;Acc:G1TFG3]	#		ENSOCUG00000000432	537.881	555.924	519.837	0.935088	-0.0968264	9.07033	0.845854	1	0.0727043
-	ENSOCUG00000029247	86.9022	129.716	44.0888	0.339888	-1.55687	6.24077	0.0469821	1	1.32807	Caspase [Source:UniProtKB/TrEMBL;Acc:U3KMM0]	#	#N/A														ENSOCUG00000000437	25.9831	26.3332	25.633	0.973409	-0.0388815	4.69937	1	1	0
KRT78	ENSOCUG00000029278	305.533	420.356	190.71	0.453686	-1.14024	8.14535	0.0351992	1	1.45347	keratin 78 [Source:HGNC Symbol;Acc:HGNC:28926]	#	#N/A														ENSOCUG00000000438	7.95249	9.75305	6.15192	0.630769	-0.664816	2.95345	0.837805	1	0.0768569
-	ENSOCUG00000029292	279.5	555.924	3.07596	0.00553306	-7.49771	5.36989	4.20197e-19	4.73472e-16	18.3765	Uncharacterized protein [Source:UniProtKB/TrEMBL;Acc:U3KM01]	#	#N/A														ENSOCUG00000000439	499.744	483.751	515.736	1.06612	0.0923681	8.96431	0.854832	1	0.0681192
-	ENSOCUG00000029664	874.336	1669.72	78.9497	0.0472831	-4.40253	8.50413	2.94749e-16	2.58315e-13	15.5305	Uncharacterized protein [Source:UniProtKB/TrEMBL;Acc:U3KLT3]	#	#N/A														ENSOCUG00000000440	96.8803	60.4689	133.292	2.2043	1.14032	6.48828	0.125773	1	0.900413
SIM1	ENSOCUG00000002759	18.5308	37.0616	0	0	#NAME?	#NUM!	0.00406299	0.29673	2.39115	single-minded family bHLH transcription factor 1 [Source:HGNC Symbol;Acc:HGNC:10882]	#	#N/A														ENSOCUG00000000442	176.218	185.308	167.127	0.901889	-0.148978	7.45929	0.815398	1	0.0886304
PGER2	ENSOCUG00000004733	10.7284	21.4567	0	0	#NAME?	#NUM!	0.0433953	1	1.36256	Uncharacterized protein [Source:UniProtKB/TrEMBL;Acc:G1SME6]	#	#N/A														ENSOCUG00000000444	249.716	277.962	221.469	0.796761	-0.327781	7.95485	0.561518	1	0.250637
NRXN1	ENSOCUG00000005620	10.7284	21.4567	0	0	#NAME?	#NUM!	0.0433953	1	1.36256	neurexin 1 [Source:HGNC Symbol;Acc:HGNC:8008]	#	#N/A														ENSOCUG00000000445	1.48797	1.95061	1.02532	0.525641	-0.92785	0.5	1	1	0
-	ENSOCUG00000007393	90.2157	180.431	0	0	#NAME?	#NUM!	1.24021e-10	7.24606e-08	9.9065	-	#	#N/A														ENSOCUG00000000446	369.803	353.06	386.546	1.09484	0.130725	8.52913	0.804636	1	0.0944006
HTR1A	ENSOCUG00000009794	12.1913	24.3826	0	0	#NAME?	#NUM!	0.027594	1	1.55919	5-hydroxytryptamine (serotonin) receptor 1A, G protein-coupled [Source:HGNC Symbol;Acc:HGNC:5286]	#	#N/A														ENSOCUG00000000448	4.07627	0.975305	7.17724	7.35897	2.8795	1.40368	0.55555	1	0.255277
KLHL31	ENSOCUG00000011879	10.7284	21.4567	0	0	#NAME?	#NUM!	0.0433953	1	1.36256	kelch-like family member 31 [Source:HGNC Symbol;Acc:HGNC:21353]	#	#N/A														ENSOCUG00000000455	1821.98	1579.99	2063.97	1.30632	0.385503	10.8185	0.378877	1	0.421502
PEG3	ENSOCUG00000012339	17.0678	34.1357	0	0	#NAME?	#NUM!	0.00627919	0.396217	2.2021	paternally expressed 3 [Source:HGNC Symbol;Acc:HGNC:8826]	#	#N/A														ENSOCUG00000000459	127.215	117.037	137.393	1.17393	0.231348	6.98649	0.73969	1	0.13095
-	ENSOCUG00000021963	10.7284	21.4567	0	0	#NAME?	#NUM!	0.0433953	1	1.36256	Uncharacterized protein [Source:UniProtKB/TrEMBL;Acc:G1TPF8]	#	#N/A														ENSOCUG00000000461	204.451	203.839	205.064	1.00601	0.00864684	7.67561	0.997814	1	0.000950563
-	ENSOCUG00000022708	11.216	22.432	0	0	#NAME?	#NUM!	0.0373004	1	1.42829	Uncharacterized protein [Source:UniProtKB/TrEMBL;Acc:G1TTX5]	#	#N/A														ENSOCUG00000000462	67.046	64.3701	69.7218	1.08314	0.115219	6.06593	0.909696	1	0.0411036
PLEKHB2	ENSOCUG00000024282	236.511	473.023	0	0	#NAME?	#NUM!	4.89758e-20	7.02357e-17	19.31	pleckstrin homology domain containing, family B (evectins) member 2 [Source:HGNC Symbol;Acc:HGNC:19236]	#	#N/A														ENSOCUG00000000463	129.503	127.765	131.241	1.02721	0.0387268	7.01671	0.96656	1	0.014771
-	ENSOCUG00000024749	32.1851	64.3701	0	0	#NAME?	#NUM!	8.43845e-05	0.0135833	4.07374	Uncharacterized protein [Source:UniProtKB/TrEMBL;Acc:G1U177]	#	#N/A														ENSOCUG00000000464	7.46483	8.77774	6.15192	0.700855	-0.512813	2.87744	0.895921	1	0.0477304
-	ENSOCUG00000024816	13.1666	26.3332	0	0	#NAME?	#NUM!	0.0204491	0.867509	1.68933	Uncharacterized protein [Source:UniProtKB/TrEMBL;Acc:G1T6G3]	#	#N/A														ENSOCUG00000000466	131.479	130.691	132.266	1.01206	0.0172879	7.03866	0.992308	1	0.00335366
-	ENSOCUG00000026446	30.7221	61.4442	0	0	#NAME?	#NUM!	0.000125816	0.0185417	3.90027	Uncharacterized protein [Source:UniProtKB/TrEMBL;Acc:G1TWK9]	#	#N/A														ENSOCUG00000000467	88.8653	113.135	64.5952	0.570955	-0.808551	6.41763	0.292079	1	0.534499
-	ENSOCUG00000027021	45.8393	91.6787	0	0	#NAME?	#NUM!	2.39414e-06	0.000590118	5.62085	Uncharacterized protein [Source:UniProtKB/TrEMBL;Acc:G1TJ91]	#	#N/A														ENSOCUG00000000468	140.294	126.79	153.798	1.21302	0.278601	7.12559	0.676521	1	0.169719
-	ENSOCUG00000027122	10.7284	21.4567	0	0	#NAME?	#NUM!	0.0433953	1	1.36256	Uncharacterized protein [Source:UniProtKB/TrEMBL;Acc:G1TMK6]	#	#N/A														ENSOCUG00000000470	193.611	166.777	220.444	1.32179	0.40249	7.58302	0.502665	1	0.298722
-	ENSOCUG00000027988	37.0616	74.1232	0	0	#NAME?	#NUM!	2.28623e-05	0.00434522	4.64088	-	#	#N/A														ENSOCUG00000000471	14.467	15.6049	13.3292	0.854167	-0.22741	3.85022	0.939143	1	0.0272681
																											ENSOCUG00000000472	165.652	177.505	153.798	0.866441	-0.206826	7.36831	0.746692	1	0.126859
																											ENSOCUG00000000473	946.108	750.009	1142.21	1.52292	0.606844	9.85419	0.18564	1	0.731328
																											ENSOCUG00000000475	1151.63	1111.85	1191.42	1.07157	0.099726	10.1686	0.826259	1	0.0828836
																											ENSOCUG00000000476	2.00063	1.95061	2.05064	1.05128	0.0721498	1	1	1	0
																											ENSOCUG00000000477	511.747	495.455	528.04	1.06577	0.0918937	8.99856	0.855011	1	0.0680282
																											ENSOCUG00000000479	512.598	462.294	562.901	1.21762	0.284069	8.9947	0.564189	1	0.248575
																											ENSOCUG00000000481	849.791	887.527	812.054	0.914962	-0.128216	9.72954	0.783308	1	0.106068
																											ENSOCUG00000000482	41.3754	45.8393	36.9115	0.805237	-0.312514	5.36226	0.783167	1	0.106145
																											ENSOCUG00000000483	7.51485	6.82713	8.20256	1.20147	0.264795	2.90368	0.975867	1	0.0106092
																											ENSOCUG00000000484	476.349	456.443	496.255	1.08722	0.120648	8.89461	0.811236	1	0.0908527
																											ENSOCUG00000000485	31.6724	24.3826	38.9622	1.59795	0.676221	4.94589	0.580782	1	0.235987
																											ENSOCUG00000000486	18.0056	17.5555	18.4558	1.05128	0.0721498	4.16993	1	1	0
																											ENSOCUG00000000487	476.887	375.492	578.281	1.54006	0.622987	8.86413	0.209899	1	0.67799
																											ENSOCUG00000000488	1777.89	1420.04	2135.74	1.504	0.588802	10.7661	0.180046	1	0.744617
																											ENSOCUG00000000489	29.3717	34.1357	24.6077	0.720879	-0.472171	4.85712	0.719884	1	0.142737
																											ENSOCUG00000000490	36.0238	14.6296	57.4179	3.92479	1.97261	4.85712	0.0869048	1	1.06096
																											ENSOCUG00000000493	314.861	336.48	293.242	0.871498	-0.198431	8.29516	0.71364	1	0.146521
																											ENSOCUG00000000494	50.6908	62.4195	38.9622	0.624199	-0.679923	5.62396	0.484061	1	0.3151
																											ENSOCUG00000000498	129.766	137.518	122.013	0.887252	-0.172584	7.01718	0.806208	1	0.0935528
																											ENSOCUG00000000499	277.287	262.357	292.216	1.11381	0.155506	8.11314	0.781391	1	0.107131
																											ENSOCUG00000000500	63.895	67.296	60.4939	0.898922	-0.153732	5.99558	0.87629	1	0.057352
																											ENSOCUG00000000501	12.7165	3.90122	21.5317	5.51923	2.46447	3.19616	0.232336	1	0.633884
																											ENSOCUG00000000502	186.671	217.493	155.849	0.716569	-0.480823	7.52441	0.427031	1	0.36954
																											ENSOCUG00000000503	407.365	447.665	367.065	0.819954	-0.286385	8.66308	0.575379	1	0.240046
																											ENSOCUG00000000506	19.2685	28.2838	10.2532	0.362511	-1.4639	4.08995	0.352427	1	0.45293
																											ENSOCUG00000000507	66.6708	78.9997	54.342	0.687876	-0.53978	6.03389	0.533491	1	0.272873
																											ENSOCUG00000000509	32.8978	16.5802	49.2154	2.96833	1.56965	4.83621	0.186415	1	0.729519
																											ENSOCUG00000000510	637.874	714.898	560.85	0.784517	-0.350123	9.30653	0.463634	1	0.333824
																											ENSOCUG00000000511	755.023	804.626	705.42	0.876706	-0.189836	9.55726	0.686429	1	0.163404
																											ENSOCUG00000000512	778.218	759.762	796.674	1.04858	0.0684411	9.60363	0.885859	1	0.0526354
																											ENSOCUG00000000515	47.5399	25.3579	69.7218	2.74951	1.45917	5.39395	0.143625	1	0.84277
																											ENSOCUG00000000516	618.443	672.96	563.926	0.837978	-0.255015	9.26687	0.595593	1	0.22505
																											ENSOCUG00000000518	54.2044	65.3454	43.0635	0.659013	-0.601622	5.7292	0.52486	1	0.279957
																											ENSOCUG00000000520	55.4548	56.5677	54.342	0.960654	-0.0579108	5.79295	0.971471	1	0.0125703
																											ENSOCUG00000000521	501.157	488.628	513.686	1.05128	0.0721498	8.96867	0.88732	1	0.0519196
																											ENSOCUG00000000524	515.549	587.134	443.964	0.756155	-0.403247	8.99592	0.411782	1	0.385332
																											ENSOCUG00000000525	547.459	582.257	512.66	0.880471	-0.183653	9.09369	0.707975	1	0.149982
																											ENSOCUG00000000526	173.267	140.444	206.089	1.46741	0.553276	7.41049	0.369884	1	0.431934
																											ENSOCUG00000000527	12.2913	20.4814	4.10128	0.200244	-2.32017	3.19616	0.269805	1	0.56895
																											ENSOCUG00000000528	1.97562	2.92591	1.02532	0.350427	-1.51281	0.792481	0.911891	1	0.0400571
																											ENSOCUG00000000530	322.688	311.122	334.254	1.07435	0.103465	8.33307	0.850575	1	0.0702873
																											ENSOCUG00000000531	468.984	443.764	494.204	1.11367	0.155316	8.87131	0.757783	1	0.120455
																											ENSOCUG00000000532	2026.66	2334.88	1718.44	0.735985	-0.442251	10.968	0.310415	1	0.508058
																											ENSOCUG00000000533	22.7946	10.7284	34.8609	3.24942	1.70018	4.27345	0.236893	1	0.625448
																											ENSOCUG00000000534	60.694	72.1726	49.2154	0.681913	-0.552341	5.89721	0.540398	1	0.267286
																											ENSOCUG00000000535	80.7377	70.2219	91.2535	1.2995	0.377958	6.32283	0.64104	1	0.193115
																											ENSOCUG00000000536	358.462	295.517	421.407	1.426	0.51197	8.46308	0.32584	1	0.486995
																											ENSOCUG00000000540	1.97562	2.92591	1.02532	0.350427	-1.51281	0.792481	0.911891	1	0.0400571
																											ENSOCUG00000000543	225.045	220.419	229.672	1.04198	0.0593257	7.81377	0.925646	1	0.0335552
																											ENSOCUG00000000545	24.6327	39.0122	10.2532	0.262821	-1.92785	4.32193	0.166568	1	0.778407
																											ENSOCUG00000000547	5.95186	7.80244	4.10128	0.525641	-0.92785	2.5	0.810331	1	0.0913375
																											ENSOCUG00000000548	323.376	304.295	342.457	1.12541	0.170452	8.33455	0.752052	1	0.123752
																											ENSOCUG00000000552	1143.27	1178.17	1108.37	0.940758	-0.0881041	10.1583	0.846595	1	0.0723241
																											ENSOCUG00000000553	51.8662	56.5677	47.1647	0.833775	-0.262269	5.69077	0.798103	1	0.0979409
																											ENSOCUG00000000554	42.6633	55.5924	29.7343	0.534863	-0.902759	5.34544	0.388067	1	0.411093
																											ENSOCUG00000000555	29.4217	32.1851	26.6583	0.828283	-0.271805	4.87242	0.8497	1	0.0707345
																											ENSOCUG00000000557	270.072	243.826	296.318	1.21528	0.281291	8.07035	0.612611	1	0.212815
																											ENSOCUG00000000558	181.019	237.974	124.064	0.521332	-0.939724	7.4248	0.12371	1	0.907595
																											ENSOCUG00000000559	168.99	187.259	150.722	0.804888	-0.31314	7.39232	0.617813	1	0.209143
																											ENSOCUG00000000560	104.908	107.284	102.532	0.955711	-0.0653537	6.71261	0.941588	1	0.0261392
																											ENSOCUG00000000561	20.694	12.679	28.709	2.2643	1.17906	4.2539	0.434906	1	0.361605
																											ENSOCUG00000000562	728.615	794.873	662.357	0.833286	-0.263116	9.50302	0.576368	1	0.2393
																											ENSOCUG00000000564	332.579	345.258	319.9	0.926554	-0.110054	8.3765	0.839701	1	0.0758753
																											ENSOCUG00000000565	681.613	688.565	674.661	0.979807	-0.0294308	9.41273	0.953703	1	0.020587
																											ENSOCUG00000000566	34.9359	37.0616	32.8103	0.88529	-0.175778	5.12396	0.901445	1	0.0450608
																											ENSOCUG00000000568	14548.8	16075.9	13021.6	0.810003	-0.304001	13.8206	0.467372	1	0.330337
																											ENSOCUG00000000569	6.87715	11.7037	2.05064	0.175214	-2.51281	2.29248	0.424358	1	0.372267
																											ENSOCUG00000000570	135.03	152.148	117.912	0.774984	-0.367762	7.06545	0.583496	1	0.233962
																											ENSOCUG00000000572	215.742	223.345	208.14	0.931923	-0.101718	7.75227	0.868254	1	0.0613533
																											ENSOCUG00000000573	173.279	159.95	186.608	1.16667	0.222392	7.43267	0.723808	1	0.140376
																											ENSOCUG00000000574	54.1544	67.296	41.0128	0.609439	-0.714447	5.71523	0.448054	1	0.34867
																											ENSOCUG00000000575	28.2963	36.0863	20.5064	0.568261	-0.815375	4.76569	0.527335	1	0.277914
																											ENSOCUG00000000576	65.9956	65.3454	66.6458	1.0199	0.0284284	6.04423	0.993691	1	0.00274865
																											ENSOCUG00000000577	194.511	211.641	177.38	0.838119	-0.254773	7.59809	0.674056	1	0.171304
																											ENSOCUG00000000578	103.432	124.839	82.0256	0.657051	-0.605922	6.66096	0.405094	1	0.392444
																											ENSOCUG00000000581	1192.91	1161.59	1224.23	1.05393	0.0757792	10.2198	0.86765	1	0.0616552
																											ENSOCUG00000000582	395.149	424.258	366.039	0.862776	-0.212942	8.62233	0.679901	1	0.167554
																											ENSOCUG00000000583	211.153	142.395	279.912	1.96575	0.975082	7.64129	0.0962915	1	1.01641
																											ENSOCUG00000000584	78.7996	85.8268	71.7724	0.836247	-0.257999	6.29436	0.75826	1	0.120182
																											ENSOCUG00000000585	48.015	46.8146	49.2154	1.05128	0.0721498	5.58496	0.964433	1	0.0157281
																											ENSOCUG00000000586	489.09	459.369	518.812	1.1294	0.17556	8.93129	0.725017	1	0.139652
																											ENSOCUG00000000587	190.772	217.493	164.051	0.754283	-0.406822	7.56141	0.499902	1	0.301116
																											ENSOCUG00000000588	214.029	230.172	197.887	0.859735	-0.218036	7.73755	0.712919	1	0.14696
																											ENSOCUG00000000589	215.968	214.567	217.368	1.01305	0.0187105	7.75464	0.983236	1	0.00734226
																											ENSOCUG00000000590	250.078	243.826	256.33	1.05128	0.0721498	7.96578	0.904555	1	0.0435651
																											ENSOCUG00000000591	3.00094	2.92591	3.07596	1.05128	0.0721498	1.58496	1	1	0
																											ENSOCUG00000000592	507.846	447.665	568.028	1.26887	0.343542	8.97805	0.485604	1	0.313718
																											ENSOCUG00000000593	275.111	307.221	243.001	0.790965	-0.338315	8.09398	0.539794	1	0.267772
																											ENSOCUG00000000594	216.793	222.37	211.216	0.949843	-0.0742397	7.7597	0.90598	1	0.0428815
																											ENSOCUG00000000595	241.901	242.851	240.95	0.992174	-0.0113352	7.91826	0.99233	1	0.00334374
																											ENSOCUG00000000596	1059.02	1065.03	1053	0.988706	-0.0163869	10.0485	0.973453	1	0.0116849
																											ENSOCUG00000000597	15.4673	16.5802	14.3545	0.865762	-0.207958	3.94741	0.943371	1	0.0253174
																											ENSOCUG00000000598	152.798	158.975	146.621	0.92229	-0.116707	7.2543	0.864184	1	0.0633936
																											ENSOCUG00000000601	776.718	858.268	695.167	0.809965	-0.304068	9.59325	0.515255	1	0.287977
																											ENSOCUG00000000602	25.0078	24.3826	25.633	1.05128	0.0721498	4.64386	0.990871	1	0.00398294
																											ENSOCUG00000000603	8.46515	9.75305	7.17724	0.735897	-0.442423	3.06464	0.904291	1	0.0436918
																											ENSOCUG00000000604	4421.54	3884.64	4958.45	1.27642	0.352109	12.0996	0.407314	1	0.390071
																											ENSOCUG00000000606	10.0031	9.75305	10.2532	1.05128	0.0721498	3.32193	1	1	0
																											ENSOCUG00000000607	1873.72	2041.31	1706.13	0.835802	-0.258767	10.8659	0.554264	1	0.256283
																											ENSOCUG00000000608	2655.35	3207.78	2102.93	0.655573	-0.609172	11.3428	0.15842	1	0.80019
																											ENSOCUG00000000609	17.0053	16.5802	17.4304	1.05128	0.0721498	4.08746	1	1	0
																											ENSOCUG00000000611	5837.71	6276.09	5399.34	0.860303	-0.217083	12.5071	0.607414	1	0.216515
																											ENSOCUG00000000612	25.9831	26.3332	25.633	0.973409	-0.0388815	4.69937	1	1	0
																											ENSOCUG00000000613	210.928	271.135	150.722	0.555894	-0.847119	7.65931	0.148168	1	0.829245
																											ENSOCUG00000000614	72.7352	62.4195	83.051	1.33053	0.412	6.16993	0.625267	1	0.203934
																											ENSOCUG00000000615	116.824	102.407	131.241	1.28156	0.357904	6.85712	0.611718	1	0.213448
																											ENSOCUG00000000617	39.8625	44.864	34.8609	0.777035	-0.363949	5.30551	0.749391	1	0.125291
																											ENSOCUG00000000618	126.615	140.444	112.785	0.803063	-0.316416	6.97564	0.645884	1	0.189845
																											ENSOCUG00000000619	23.9575	25.3579	22.5571	0.889546	-0.168858	4.57994	0.933146	1	0.0300506
																											ENSOCUG00000000621	138.993	137.518	140.469	1.02146	0.0306305	7.11879	0.974922	1	0.0110303
																											ENSOCUG00000000623	1.00031	0.975305	1.02532	1.05128	0.0721498	1.28137e-15	1	1	0
																											ENSOCUG00000000624	221.569	236.024	207.115	0.877516	-0.188502	7.78854	0.749283	1	0.125354
																											ENSOCUG00000000625	138.193	168.728	107.659	0.638061	-0.648233	7.07444	0.325891	1	0.486927
																											ENSOCUG00000000626	166.715	156.049	177.38	1.1367	0.18485	7.37828	0.773426	1	0.111581
																											ENSOCUG00000000628	253.329	276.987	229.672	0.82918	-0.270242	7.97855	0.632144	1	0.199184
																											ENSOCUG00000000629	629.822	549.097	710.547	1.29403	0.37187	9.28685	0.436897	1	0.359621
																											ENSOCUG00000000630	235.086	168.728	301.444	1.78657	0.837194	7.81715	0.142002	1	0.847705
																											ENSOCUG00000000631	71.9475	73.1479	70.7471	0.967179	-0.0481444	6.16867	0.972178	1	0.012254
																											ENSOCUG00000000632	618.618	586.158	651.078	1.11076	0.151541	9.27092	0.753823	1	0.12273
																											ENSOCUG00000000633	1047.7	1046.5	1048.9	1.00229	0.00330585	10.033	0.996593	1	0.0014822
																											ENSOCUG00000000634	68.8215	75.0985	62.5445	0.832834	-0.263899	6.09876	0.76683	1	0.115301
																											ENSOCUG00000000636	1.00031	0.975305	1.02532	1.05128	0.0721498	1.28137e-15	1	1	0
																											ENSOCUG00000000637	685.352	882.651	488.053	0.55294	-0.854806	9.3583	0.0719688	1	1.14286
																											ENSOCUG00000000638	191.76	158.975	224.545	1.41246	0.498209	7.56176	0.406713	1	0.390712
																											ENSOCUG00000000641	54.6296	48.7652	60.4939	1.24051	0.310937	5.76325	0.751076	1	0.124316
																											ENSOCUG00000000645	24.8078	32.1851	17.4304	0.54157	-0.884781	4.56593	0.521682	1	0.282594
																											ENSOCUG00000000649	123.889	126.79	120.988	0.954241	-0.067575	6.95251	0.933224	1	0.0300139
																											ENSOCUG00000000650	281.838	364.764	198.912	0.545317	-0.874832	8.0734	0.110341	1	0.957263
																											ENSOCUG00000000651	1298.51	1342.02	1254.99	0.935152	-0.0967271	10.3418	0.82986	1	0.080995
																											ENSOCUG00000000652	39.9625	40.9628	38.9622	0.95116	-0.0722401	5.32012	0.971845	1	0.0124029
																											ENSOCUG00000000653	506.771	569.578	443.964	0.779461	-0.359452	8.97402	0.465731	1	0.331865
																											ENSOCUG00000000655	44.1388	38.0369	50.2407	1.32084	0.401457	5.45006	0.707046	1	0.150552
																											ENSOCUG00000000656	77.8743	81.9256	73.8231	0.901099	-0.150243	6.28112	0.866185	1	0.0623893
																											ENSOCUG00000000657	39.3623	24.3826	54.342	2.22872	1.15621	5.18589	0.285812	1	0.543919
																											ENSOCUG00000000658	9.41544	12.679	6.15192	0.485207	-1.04333	3.1427	0.681311	1	0.166655
																											ENSOCUG00000000659	24.4451	26.3332	22.5571	0.8566	-0.223306	4.60716	0.898092	1	0.0466793
																											ENSOCUG00000000663	20.2438	30.2344	10.2532	0.339123	-1.56012	4.13806	0.308869	1	0.510225
																											ENSOCUG00000000666	21.3692	26.3332	16.4051	0.622982	-0.682738	4.37744	0.655829	1	0.183209
																											ENSOCUG00000000668	188.822	173.604	204.039	1.17531	0.233041	7.55618	0.703548	1	0.152706
																											ENSOCUG00000000669	10.4908	10.7284	10.2532	0.955711	-0.0653537	3.39068	1	1	0
																											ENSOCUG00000000670	30.0219	48.7652	11.2785	0.231282	-2.11227	4.55164	0.0962011	1	1.01682
																											ENSOCUG00000000671	25.3454	31.2098	19.4811	0.624199	-0.679923	4.62396	0.623773	1	0.204973
																											ENSOCUG00000000673	48.7777	37.0616	60.4939	1.63225	0.706865	5.56529	0.473757	1	0.324444
																											ENSOCUG00000000674	13.5167	12.679	14.3545	1.13215	0.179065	3.7539	0.966567	1	0.0147678
																											ENSOCUG00000000676	333.992	390.122	277.862	0.712244	-0.489557	8.363	0.354113	1	0.450858
																											ENSOCUG00000000677	2934.89	3222.41	2647.38	0.821553	-0.283575	11.5121	0.509194	1	0.293117
																											ENSOCUG00000000678	614.417	630.047	598.787	0.950385	-0.073416	9.26261	0.88135	1	0.0548515
																											ENSOCUG00000000679	614.692	579.331	650.053	1.12208	0.16617	9.26133	0.73082	1	0.13619
																											ENSOCUG00000000680	274.473	272.11	276.837	1.01737	0.0248441	8.10047	0.971204	1	0.0126897
																											ENSOCUG00000000681	36.2738	44.864	27.6837	0.617057	-0.696525	5.13922	0.541589	1	0.26633
																											ENSOCUG00000000682	295.993	252.604	339.381	1.34353	0.426029	8.19375	0.43156	1	0.364959
																											ENSOCUG00000000683	371.366	432.06	310.672	0.719048	-0.475839	8.51717	0.358245	1	0.44582
																											ENSOCUG00000000684	704.895	740.256	669.534	0.904463	-0.144867	9.45945	0.760633	1	0.118825
																											ENSOCUG00000000687	147.334	152.148	142.52	0.936719	-0.0943114	7.20217	0.893889	1	0.0487162
																											ENSOCUG00000000688	469.122	458.393	479.85	1.04681	0.0659976	8.87344	0.898548	1	0.0464588
																											ENSOCUG00000000689	168.965	188.234	149.697	0.79527	-0.330483	7.39114	0.598014	1	0.223289
																											ENSOCUG00000000692	687.515	778.293	596.737	0.766725	-0.38322	9.41256	0.418165	1	0.378652
																											ENSOCUG00000000694	281.626	233.098	330.153	1.41637	0.5022	8.11589	0.358496	1	0.445516
																											ENSOCUG00000000695	388.446	405.727	371.166	0.914818	-0.128444	8.60014	0.80624	1	0.0935356
																											ENSOCUG00000000697	109.109	103.382	114.836	1.11079	0.151584	6.76764	0.842172	1	0.074599
																											ENSOCUG00000000699	15.2923	23.4073	7.17724	0.306624	-1.70546	3.69616	0.344785	1	0.462452
																											ENSOCUG00000000703	99.9312	101.432	98.4308	0.970414	-0.0433274	6.6427	0.967815	1	0.0142075
																											ENSOCUG00000000706	329.028	323.801	334.254	1.03228	0.0458385	8.36188	0.936887	1	0.0283127
																											ENSOCUG00000000707	110.922	92.654	129.19	1.39433	0.479574	6.77357	0.500856	1	0.300287
																											ENSOCUG00000000708	120.038	117.037	123.038	1.05128	0.0721498	6.90689	0.928883	1	0.0320388
																											ENSOCUG00000000709	148.384	151.172	145.596	0.96311	-0.0542275	7.21294	0.943895	1	0.0250763
																											ENSOCUG00000000711	2.02563	0.975305	3.07596	3.15385	1.65711	0.792481	0.890414	1	0.0504081
																											ENSOCUG00000000713	33.9606	35.111	32.8103	0.934473	-0.0977752	5.08496	0.959919	1	0.0177653
																											ENSOCUG00000000715	1993.01	2107.63	1878.39	0.89123	-0.16613	10.9583	0.703671	1	0.152631
																											ENSOCUG00000000716	57.0178	55.5924	58.4433	1.05128	0.0721498	5.83289	0.957549	1	0.018839
																											ENSOCUG00000000717	156.799	162.876	150.722	0.92538	-0.111882	7.29169	0.868989	1	0.0609858
																											ENSOCUG00000000719	122.126	135.567	108.684	0.801697	-0.318871	6.92343	0.647395	1	0.18883
																											ENSOCUG00000000720	301.107	313.073	289.14	0.923556	-0.114728	8.23299	0.836493	1	0.0775379
																											ENSOCUG00000000722	284.214	192.135	376.293	1.95848	0.969734	8.07084	0.0764981	1	1.11635
																											ENSOCUG00000000723	5.48922	5.85183	5.1266	0.876068	-0.190885	2.45345	1	1	0
																											ENSOCUG00000000724	64.5827	60.4689	68.6965	1.13606	0.184043	6.01014	0.847069	1	0.0720812
																											ENSOCUG00000000725	6.97718	7.80244	6.15192	0.788462	-0.342888	2.79248	0.95729	1	0.0189565
																											ENSOCUG00000000726	4.4889	4.87652	4.10128	0.841026	-0.249778	2.16096	1	1	0
																											ENSOCUG00000000727	3.95123	5.85183	2.05064	0.350427	-1.51281	1.79248	0.769668	1	0.113697
																											ENSOCUG00000000728	80.3626	84.8515	75.8737	0.894194	-0.16134	6.3262	0.852797	1	0.0691543
																											ENSOCUG00000000729	451.716	457.418	446.014	0.97507	-0.0364227	8.81916	0.94663	1	0.0238198
																											ENSOCUG00000000730	112.323	78.0244	146.621	1.87917	0.910093	6.7409	0.197069	1	0.705381
																											ENSOCUG00000000731	457.668	465.22	450.116	0.967532	-0.0476185	8.83796	0.928481	1	0.0322269
																											ENSOCUG00000000732	17.0053	16.5802	17.4304	1.05128	0.0721498	4.08746	1	1	0
																											ENSOCUG00000000733	72.8978	76.0738	69.7218	0.916502	-0.12579	6.18643	0.894722	1	0.0483118
																											ENSOCUG00000000734	3167.06	3084.89	3249.24	1.05328	0.0748839	11.6284	0.861797	1	0.0645953
																											ENSOCUG00000000736	5.56424	2.92591	8.20256	2.80342	1.48719	2.29248	0.687838	1	0.162514
																											ENSOCUG00000000737	12.5914	8.77774	16.4051	1.86895	0.902225	3.58496	0.665881	1	0.176604
																											ENSOCUG00000000738	212.817	177.505	248.128	1.39786	0.483218	7.71333	0.408319	1	0.389
																											ENSOCUG00000000740	3118.24	3129.75	3106.72	0.992641	-0.0106562	11.6065	0.980989	1	0.0083358
																											ENSOCUG00000000741	277.024	292.591	261.457	0.89359	-0.162315	8.11159	0.771858	1	0.112463
																											ENSOCUG00000000743	13.4417	15.6049	11.2785	0.722756	-0.468419	3.72972	0.836066	1	0.0777592
																											ENSOCUG00000000744	3202.83	2569.93	3835.72	1.49254	0.577771	11.6164	0.178206	1	0.749078
																											ENSOCUG00000000747	155.474	174.58	136.368	0.78112	-0.356384	7.26955	0.578632	1	0.237598
																											ENSOCUG00000000749	327.877	328.678	327.077	0.99513	-0.00704238	8.35701	0.995987	1	0.0017463
																											ENSOCUG00000000750	57.718	68.2713	47.1647	0.690842	-0.533571	5.82642	0.563571	1	0.249052
																											ENSOCUG00000000754	65.4079	68.2713	62.5445	0.916117	-0.126396	6.03001	0.900533	1	0.0455001
																											ENSOCUG00000000755	416.905	375.492	458.318	1.22058	0.287566	8.69642	0.57218	1	0.242468
																											ENSOCUG00000000756	69.9719	70.2219	69.7218	0.992877	-0.0103124	6.12869	1	1	0
																											ENSOCUG00000000758	15.3923	19.5061	11.2785	0.578205	-0.790347	3.89068	0.670417	1	0.173655
																											ENSOCUG00000000763	179.118	192.135	166.102	0.864506	-0.210052	7.48095	0.736631	1	0.13275
																											ENSOCUG00000000764	1529.52	1149.88	1909.15	1.66029	0.731439	10.533	0.0991118	1	1.00387
																											ENSOCUG00000000765	292.304	296.493	288.115	0.971744	-0.0413514	8.19118	0.945817	1	0.0241931
																											ENSOCUG00000000769	679.787	679.787	679.787	1	6.40685e-16	9.40894	1	1	0
																											ENSOCUG00000000771	2.46327	3.90122	1.02532	0.262821	-1.92785	1	0.82194	1	0.0851598
																											ENSOCUG00000000775	8.85277	14.6296	3.07596	0.210256	-2.24978	2.74593	0.386253	1	0.413128
																											ENSOCUG00000000776	98.4183	100.456	96.3801	0.959422	-0.0597619	6.62054	0.950019	1	0.0222678
																											ENSOCUG00000000777	351.172	359.887	342.457	0.951567	-0.0716229	8.45559	0.896187	1	0.0476012
																											ENSOCUG00000000779	73.9356	95.5799	52.2913	0.547096	-0.870135	6.14357	0.290814	1	0.536384
																											ENSOCUG00000000780	328.015	343.307	312.723	0.910912	-0.134616	8.35605	0.803747	1	0.0948805
																											ENSOCUG00000000781	361.588	333.554	389.622	1.16809	0.224153	8.49385	0.668977	1	0.174589
																											ENSOCUG00000000784	201.751	229.197	174.304	0.760502	-0.394976	7.64295	0.506233	1	0.29565
																											ENSOCUG00000000786	1122.54	867.046	1378.03	1.58934	0.668428	10.0942	0.139529	1	0.855335
																											ENSOCUG00000000789	186.571	221.394	151.747	0.685417	-0.544945	7.518	0.367559	1	0.434673
																											ENSOCUG00000000790	404.626	414.505	394.748	0.952338	-0.0704546	8.66002	0.894635	1	0.0483543
																											ENSOCUG00000000791	9119.69	7118.75	11120.6	1.56216	0.643542	13.1192	0.12657	1	0.897668
																											ENSOCUG00000000792	162.776	209.691	115.861	0.552534	-0.855864	7.28419	0.173126	1	0.761637
																											ENSOCUG00000000794	362.776	387.196	338.356	0.873862	-0.194523	8.49966	0.711202	1	0.148007
																											ENSOCUG00000000795	80.3876	83.8762	76.899	0.916816	-0.125296	6.32754	0.889491	1	0.0508585
																											ENSOCUG00000000798	133.579	168.728	98.4308	0.58337	-0.777516	7.0098	0.243508	1	0.613487
																											ENSOCUG00000000800	560.588	510.084	611.091	1.19802	0.260651	9.12492	0.592272	1	0.227478
																											ENSOCUG00000000803	188.897	170.678	207.115	1.21348	0.27915	7.55471	0.646741	1	0.189269
																											ENSOCUG00000000804	111.922	133.617	90.2282	0.675276	-0.566451	6.77873	0.423979	1	0.372656
																											ENSOCUG00000000805	227.596	280.888	174.304	0.620548	-0.688384	7.78966	0.230636	1	0.637073
																											ENSOCUG00000000806	55.5299	53.6418	57.4179	1.0704	0.098145	5.79436	0.935348	1	0.0290268
																											ENSOCUG00000000807	222.432	262.357	182.507	0.695644	-0.523579	7.7736	0.364865	1	0.437868
																											ENSOCUG00000000809	68.8215	75.0985	62.5445	0.832834	-0.263899	6.09876	0.76683	1	0.115301
																											ENSOCUG00000000810	383.382	503.257	263.507	0.523604	-0.933453	8.50843	0.0708618	1	1.14959
																											ENSOCUG00000000811	491.929	528.615	455.242	0.861198	-0.215583	8.93828	0.664593	1	0.177444
																											ENSOCUG00000000815	1.00031	0.975305	1.02532	1.05128	0.0721498	1.28137e-15	1	1	0
																											ENSOCUG00000000816	766.477	717.824	815.13	1.13556	0.183399	9.57919	0.696105	1	0.157325
																											ENSOCUG00000000817	597.362	615.417	579.306	0.941322	-0.0872394	9.2218	0.859087	1	0.0659627
																											ENSOCUG00000000818	746.846	803.651	690.041	0.858632	-0.219888	9.54048	0.640049	1	0.193787
																											ENSOCUG00000000819	21.5192	20.4814	22.5571	1.10134	0.139264	4.42587	0.957665	1	0.0187863
																											ENSOCUG00000000820	176.243	184.333	168.153	0.912224	-0.132541	7.4599	0.836609	1	0.0774775
																											ENSOCUG00000000821	1130.4	980.181	1280.63	1.30652	0.385728	10.1298	0.392803	1	0.405826
																											ENSOCUG00000000822	740.794	679.787	801.801	1.17949	0.23816	9.52802	0.612594	1	0.212828
																											ENSOCUG00000000823	200.1	213.592	186.608	0.873668	-0.194843	7.64129	0.747884	1	0.126166
																											ENSOCUG00000000824	1019.92	1130.38	909.459	0.804562	-0.313725	9.98573	0.490794	1	0.3091
																											ENSOCUG00000000825	1.51297	0.975305	2.05064	2.10256	1.07215	0.5	0.991961	1	0.00350522
																											ENSOCUG00000000826	70.3595	75.0985	65.6205	0.873793	-0.194637	6.13339	0.830202	1	0.0808162
																											ENSOCUG00000000827	376.943	374.517	379.369	1.01295	0.0185687	8.55817	0.976983	1	0.0101128
																											ENSOCUG00000000828	1830.97	1649.24	2012.7	1.22038	0.287333	10.8313	0.511805	1	0.290895
																											ENSOCUG00000000829	88.9403	110.209	67.6712	0.614023	-0.703635	6.43229	0.359506	1	0.444294
																											ENSOCUG00000000830	119.475	158.975	79.975	0.503067	-0.991176	6.81707	0.152203	1	0.817577
																											ENSOCUG00000000831	65.2079	76.0738	54.342	0.714333	-0.485332	6.00666	0.580696	1	0.236051
																											ENSOCUG00000000832	55.3298	61.4442	49.2154	0.800977	-0.320168	5.78112	0.741952	1	0.129624
																											ENSOCUG00000000833	179.018	196.036	162.001	0.826381	-0.275121	7.47742	0.656758	1	0.182594
																											ENSOCUG00000000834	10.0531	7.80244	12.3038	1.57692	0.657112	3.29248	0.802285	1	0.0956713
																											ENSOCUG00000000835	91.5286	109.234	73.8231	0.675824	-0.56528	6.48864	0.458274	1	0.338875
																											ENSOCUG00000000837	505.17	512.035	498.306	0.973187	-0.0392113	8.98049	0.940662	1	0.0265665
																											ENSOCUG00000000847	213.917	254.555	173.279	0.680715	-0.554877	7.71439	0.34149	1	0.466621
																											ENSOCUG00000000848	1634.59	1630.71	1638.46	1.00475	0.00684235	10.6747	0.989165	1	0.00473107
																											ENSOCUG00000000849	113.423	115.086	111.76	0.9711	-0.0423089	6.82541	0.965628	1	0.0151903
																											ENSOCUG00000000850	4.56393	1.95061	7.17724	3.67949	1.8795	1.90368	0.663867	1	0.177919
																											ENSOCUG00000000851	17904.8	13471.9	22337.6	1.65809	0.729524	14.0824	0.0820273	1	1.08604
																											ENSOCUG00000000852	43.7012	35.111	52.2913	1.48932	0.57465	5.42118	0.583547	1	0.233924
																											ENSOCUG00000000853	268.947	287.715	250.178	0.869535	-0.201684	8.06765	0.718843	1	0.143366
																											ENSOCUG00000000855	364.139	354.036	374.242	1.05707	0.0800767	8.50779	0.882286	1	0.0543908
																											ENSOCUG00000000856	95.4548	116.061	74.8484	0.644904	-0.632843	6.54232	0.398082	1	0.400027
																											ENSOCUG00000000857	74.6983	85.8268	63.5699	0.740676	-0.433086	6.20681	0.603097	1	0.219613
																											ENSOCUG00000000859	195.686	205.789	185.583	0.901811	-0.149104	7.61047	0.809173	1	0.0919588
																											ENSOCUG00000000861	683.038	592.985	773.092	1.30373	0.382643	9.40317	0.419158	1	0.377622
																											ENSOCUG00000000863	20.7315	31.2098	10.2532	0.328526	-1.60592	4.16096	0.288925	1	0.539215
																											ENSOCUG00000000864	203.776	230.172	177.38	0.770643	-0.375865	7.65864	0.526233	1	0.278822
																											ENSOCUG00000000865	702.682	806.577	598.787	0.742381	-0.429769	9.44078	0.36262	1	0.440548
																											ENSOCUG00000000866	104.02	121.913	86.1269	0.706462	-0.501317	6.67905	0.491493	1	0.308482
																											ENSOCUG00000000867	122.138	115.086	129.19	1.12256	0.166787	6.92996	0.817163	1	0.0876912
																											ENSOCUG00000000874	792.748	712.948	872.548	1.22386	0.291438	9.62337	0.532006	1	0.274084
																											ENSOCUG00000000875	23.0822	19.5061	26.6583	1.36667	0.450661	4.51118	0.768782	1	0.114197
																											ENSOCUG00000000876	36.4739	37.0616	35.8862	0.968286	-0.0464947	5.18861	0.994855	1	0.0022404
																											ENSOCUG00000000877	32.7602	41.9381	23.5824	0.562314	-0.830553	4.97491	0.486514	1	0.312905
																											ENSOCUG00000000878	654.555	624.195	684.914	1.09728	0.133926	9.35282	0.780474	1	0.107641
																											ENSOCUG00000000880	5987.72	7043.65	4931.79	0.700175	-0.514212	12.525	0.224123	1	0.649513
																											ENSOCUG00000000881	9.2904	17.5555	1.02532	0.0584046	-4.09778	2.08496	0.153964	1	0.81258
																											ENSOCUG00000000882	689.878	706.121	673.636	0.953995	-0.0679465	9.4298	0.888526	1	0.0513297
																											ENSOCUG00000000883	2.02563	0.975305	3.07596	3.15385	1.65711	0.792481	0.890414	1	0.0504081
																											ENSOCUG00000000884	85.6268	99.4811	71.7724	0.721468	-0.470993	6.40085	0.548819	1	0.260571
																											ENSOCUG00000000885	344.208	331.604	356.812	1.07602	0.105702	8.42617	0.845004	1	0.073141
																											ENSOCUG00000000887	302.72	350.134	255.305	0.729162	-0.455688	8.22392	0.397896	1	0.40023
																											ENSOCUG00000000889	12.1288	6.82713	17.4304	2.55311	1.35226	3.44741	0.515204	1	0.288021
																											ENSOCUG00000000895	152.723	201.888	103.557	0.512944	-0.963126	7.17585	0.132867	1	0.876581
																											ENSOCUG00000000896	43.5511	40.9628	46.1394	1.12637	0.171685	5.44209	0.888083	1	0.0515463
																											ENSOCUG00000000897	22.3695	27.3085	17.4304	0.638278	-0.647742	4.44741	0.66537	1	0.176937
																											ENSOCUG00000000898	283.351	285.764	280.938	0.98311	-0.024575	8.14639	0.971182	1	0.0126992
																											ENSOCUG00000000901	6.95217	8.77774	5.1266	0.584046	-0.775847	2.74593	0.825173	1	0.0834552
																											ENSOCUG00000000906	26.5708	23.4073	29.7343	1.2703	0.345168	4.72147	0.813398	1	0.0896968
																											ENSOCUG00000000907	322.126	313.073	331.179	1.05783	0.0811107	8.33091	0.884088	1	0.0535043
																											ENSOCUG00000000909	44.9641	45.8393	44.0888	0.961811	-0.0561743	5.49043	0.980265	1	0.00865647
																											ENSOCUG00000000910	122.301	128.74	115.861	0.899961	-0.152065	6.93229	0.83424	1	0.0787092
																											ENSOCUG00000000911	247.915	228.221	267.609	1.17258	0.229691	7.94914	0.686666	1	0.163255
																											ENSOCUG00000000915	849.691	691.491	1007.89	1.45756	0.543556	9.70534	0.240233	1	0.619368
																											ENSOCUG00000000916	255.205	203.839	306.571	1.50399	0.588792	7.96568	0.291987	1	0.534637
																											ENSOCUG00000000919	279	295.517	262.482	0.888212	-0.171024	8.12159	0.759204	1	0.119641
																											ENSOCUG00000000920	91.9913	71.1973	112.785	1.58412	0.663685	6.48559	0.381369	1	0.418655
																											ENSOCUG00000000921	627.896	584.208	671.585	1.14957	0.201089	9.29088	0.675603	1	0.170309
																											ENSOCUG00000000922	593.686	598.837	588.534	0.982795	-0.0250381	9.2135	0.96229	1	0.0166941
																											ENSOCUG00000000923	3.00094	2.92591	3.07596	1.05128	0.0721498	1.58496	1	1	0
																											ENSOCUG00000000924	30.2094	21.4567	38.9622	1.81585	0.860646	4.85368	0.488052	1	0.311534
																											ENSOCUG00000000925	313.586	266.258	360.913	1.3555	0.438824	8.27609	0.412177	1	0.384916
																											ENSOCUG00000000927	848.24	788.046	908.434	1.15277	0.205101	9.72469	0.658514	1	0.181435
																											ENSOCUG00000000928	77.9369	99.4811	56.3926	0.566868	-0.818916	6.22689	0.310183	1	0.508383
																											ENSOCUG00000000929	126.777	114.111	139.444	1.222	0.289248	6.97891	0.675194	1	0.170571
																											ENSOCUG00000000930	132.479	171.654	93.3042	0.543561	-0.879487	6.98361	0.188475	1	0.724747
																											ENSOCUG00000000931	140.594	195.061	86.1269	0.441538	-1.17939	7.01809	0.0737224	1	1.1324
																											ENSOCUG00000000933	369.278	293.567	444.989	1.5158	0.600081	8.49759	0.246891	1	0.607495
																											ENSOCUG00000000934	2.95092	4.87652	1.02532	0.210256	-2.24978	1.16096	0.738089	1	0.131891
																											ENSOCUG00000000937	482.576	493.504	471.647	0.955711	-0.0653537	8.91424	0.899045	1	0.0462184
																											ENSOCUG00000000938	125.789	132.641	118.937	0.896682	-0.157332	6.97272	0.826245	1	0.0828912
																											ENSOCUG00000000939	617.068	606.64	627.496	1.03438	0.0487669	9.26908	0.922269	1	0.0351423
																											ENSOCUG00000000940	109.434	130.691	88.1776	0.674703	-0.567675	6.74618	0.426603	1	0.369976
																											ENSOCUG00000000941	3264.37	3288.73	3240.01	0.985187	-0.0215302	11.6725	0.960628	1	0.0174447
																											ENSOCUG00000000942	373.154	382.319	363.989	0.952054	-0.0708848	8.54319	0.895847	1	0.0477663
																											ENSOCUG00000000943	18.4183	21.4567	15.3798	0.716783	-0.480391	4.18316	0.785979	1	0.104589
																											ENSOCUG00000000944	65.0453	62.4195	67.6712	1.08413	0.116544	6.0222	0.91011	1	0.0409061
																											ENSOCUG00000000945	13.5667	10.7284	16.4051	1.52914	0.612718	3.72972	0.770677	1	0.113128
																											ENSOCUG00000000947	36.8365	42.9134	30.7596	0.716783	-0.480391	5.18316	0.678423	1	0.168499
																											ENSOCUG00000000953	24.6702	17.5555	31.7849	1.81054	0.856421	4.56206	0.536231	1	0.270648
																											ENSOCUG00000000956	314.111	325.752	302.47	0.928528	-0.106983	8.29414	0.846324	1	0.0724631
																											ENSOCUG00000000957	81.563	118.012	45.1141	0.382284	-1.38728	6.18915	0.0823732	1	1.08421
																											ENSOCUG00000000958	666.696	610.541	722.851	1.18395	0.24361	9.37575	0.608864	1	0.21548
																											ENSOCUG00000000959	1526.93	1430.77	1623.08	1.13441	0.181942	10.5735	0.681295	1	0.166665
																											ENSOCUG00000000960	189.197	198.962	179.431	0.901835	-0.149064	7.56182	0.811154	1	0.0908966
																											ENSOCUG00000000962	35.2735	43.8887	26.6583	0.607407	-0.719264	5.09615	0.533731	1	0.272677
																											ENSOCUG00000000963	253.904	254.555	253.254	0.994891	-0.00738898	7.98814	0.997546	1	0.00106727
																											ENSOCUG00000000965	66.1957	57.543	74.8484	1.30074	0.379331	6.03623	0.667366	1	0.175636
																											ENSOCUG00000000966	606.377	603.714	609.04	1.00882	0.0126733	9.24406	0.982776	1	0.00754556
																											ENSOCUG00000000967	1286.95	1352.75	1221.16	0.902723	-0.147645	10.3279	0.742117	1	0.129528
																											ENSOCUG00000000969	1.48797	1.95061	1.02532	0.525641	-0.92785	0.5	1	1	0
																											ENSOCUG00000000972	23.4448	25.3579	21.5317	0.849112	-0.235973	4.54638	0.893994	1	0.0486653
																											ENSOCUG00000000974	43.9637	44.864	43.0635	0.959866	-0.0590947	5.45794	0.978673	1	0.00936235
																											ENSOCUG00000000978	3468.51	4044.59	2892.43	0.715135	-0.483712	11.7399	0.258223	1	0.588005
																											ENSOCUG00000000979	52.4789	52.6665	52.2913	0.992877	-0.0103124	5.71366	1	1	0
																											ENSOCUG00000000980	409.853	410.603	409.103	0.996346	-0.0052817	8.67896	0.99722	1	0.00120899
																											ENSOCUG00000000981	24.6577	38.0369	11.2785	0.296515	-1.75382	4.37242	0.205354	1	0.687497
																											ENSOCUG00000000982	256.918	276.987	236.849	0.855092	-0.225848	8.00075	0.68926	1	0.161617
																											ENSOCUG00000000983	850.678	752.935	948.421	1.25963	0.333002	9.72288	0.471802	1	0.32624
																											ENSOCUG00000000984	1.00031	0.975305	1.02532	1.05128	0.0721498	1.28137e-15	1	1	0
																											ENSOCUG00000000986	4.4639	5.85183	3.07596	0.525641	-0.92785	2.08496	0.86147	1	0.0647596
																											ENSOCUG00000000987	756.174	719.775	792.573	1.10114	0.138997	9.5609	0.768279	1	0.114481
																											ENSOCUG00000000988	275.386	216.518	334.254	1.54377	0.626462	8.07157	0.254123	1	0.594955
																											ENSOCUG00000000989	1293.87	1303.01	1284.73	0.98597	-0.0203838	10.3374	0.965468	1	0.0152622
																											ENSOCUG00000000990	2.95092	4.87652	1.02532	0.210256	-2.24978	1.16096	0.738089	1	0.131891
																											ENSOCUG00000000991	203.664	214.567	192.76	0.898368	-0.154621	7.66797	0.799572	1	0.0971424
																											ENSOCUG00000000996	191.772	218.468	165.077	0.755609	-0.404288	7.56914	0.502002	1	0.299295
																											ENSOCUG00000000997	108.371	112.16	104.583	0.932441	-0.100915	6.75896	0.899934	1	0.0457892
																											ENSOCUG00000000998	143.47	162.876	124.064	0.761707	-0.392691	7.15128	0.549816	1	0.259783
																											ENSOCUG00000001001	65.9081	48.7652	83.051	1.70308	0.768144	5.99185	0.373497	1	0.427713
																											ENSOCUG00000001002	66.9459	68.2713	65.6205	0.961172	-0.0571332	6.06464	0.965709	1	0.0151535
																											ENSOCUG00000001005	468.159	475.949	460.369	0.967266	-0.0480159	8.87065	0.927487	1	0.032692
																											ENSOCUG00000001008	447.752	472.048	423.457	0.897065	-0.156715	8.80443	0.757518	1	0.120607
																											ENSOCUG00000001009	651.666	676.862	626.471	0.925552	-0.111613	9.34691	0.817047	1	0.0877529
																											ENSOCUG00000001011	29.2341	19.5061	38.9622	1.99744	0.998149	4.78493	0.427182	1	0.369387
																											ENSOCUG00000001013	1875.02	1630.71	2119.34	1.29964	0.378113	10.8603	0.387399	1	0.411841
																											ENSOCUG00000001016	89.0028	87.7774	90.2282	1.02792	0.0397283	6.47564	0.97479	1	0.0110887
																											ENSOCUG00000001019	4.56393	1.95061	7.17724	3.67949	1.8795	1.90368	0.663867	1	0.177919
																											ENSOCUG00000001020	366.089	357.937	374.242	1.04555	0.0642662	8.51569	0.906489	1	0.0426376
																											ENSOCUG00000001023	714.936	768.54	661.332	0.860504	-0.216747	9.4776	0.646521	1	0.189417
																											ENSOCUG00000001026	794.873	789.997	799.75	1.01235	0.017702	9.63455	0.97262	1	0.0120568
																											ENSOCUG00000001027	1.51297	0.975305	2.05064	2.10256	1.07215	0.5	0.991961	1	0.00350522
																											ENSOCUG00000001028	870.347	1005.54	735.155	0.731105	-0.45185	9.74783	0.327717	1	0.484502
																											ENSOCUG00000001029	4.02626	2.92591	5.1266	1.75214	0.809115	1.95345	0.902339	1	0.0446302
																											ENSOCUG00000001031	229.797	195.061	264.533	1.35615	0.439521	7.82754	0.443657	1	0.352953
																											ENSOCUG00000001033	1.51297	0.975305	2.05064	2.10256	1.07215	0.5	0.991961	1	0.00350522
																											ENSOCUG00000001034	712.735	534.467	891.003	1.66709	0.73733	9.43062	0.118355	1	0.926815
																											ENSOCUG00000001035	4554.21	4668.78	4439.64	0.950919	-0.072605	12.1525	0.864555	1	0.0632076
																											ENSOCUG00000001039	65.9581	46.8146	85.1016	1.81784	0.862227	5.98	0.317122	1	0.498773
																											ENSOCUG00000001040	6.51454	5.85183	7.17724	1.2265	0.294542	2.69616	0.977826	1	0.00973838
																											ENSOCUG00000001041	18.4683	19.5061	17.4304	0.89359	-0.162315	4.2047	0.954437	1	0.0202526
																											ENSOCUG00000001042	5354.46	4729.25	5979.67	1.2644	0.338453	12.3766	0.42394	1	0.372696
																											ENSOCUG00000001043	448.34	589.084	307.596	0.52216	-0.937436	8.73361	0.0626803	1	1.20287
																											ENSOCUG00000001045	24.9078	28.2838	21.5317	0.761273	-0.393514	4.62515	0.792194	1	0.101168
																											ENSOCUG00000001047	34.1732	46.8146	21.5317	0.459936	-1.1205	4.98864	0.334864	1	0.475131
																											ENSOCUG00000001048	175.98	134.592	217.368	1.61501	0.691546	7.41822	0.259852	1	0.585274
																											ENSOCUG00000001050	652.441	646.627	658.256	1.01798	0.0257142	9.34965	0.960346	1	0.0175723
																											ENSOCUG00000001051	27.1585	20.4814	33.8356	1.65201	0.724226	4.71836	0.584763	1	0.23302
																											ENSOCUG00000001052	186.596	180.431	192.76	1.06833	0.0953572	7.54299	0.882681	1	0.0541963
																											ENSOCUG00000001053	72.8728	77.0491	68.6965	0.891594	-0.165542	6.18493	0.85566	1	0.0676988
																											ENSOCUG00000001054	5512.92	5726.99	5298.86	0.925243	-0.112096	12.4275	0.791148	1	0.101742
																											ENSOCUG00000001055	200.538	176.53	224.545	1.27199	0.347091	7.63732	0.560464	1	0.251452
																											ENSOCUG00000001057	311.672	360.863	262.482	0.727374	-0.459232	8.26569	0.391378	1	0.407404
																											ENSOCUG00000001058	498.268	341.357	655.18	1.91934	0.940611	8.88544	0.0576674	1	1.23907
																											ENSOCUG00000001060	471.222	496.43	446.014	0.898443	-0.1545	8.8782	0.758886	1	0.119824
																											ENSOCUG00000001061	100.181	91.6787	108.684	1.18549	0.245481	6.64125	0.746637	1	0.12689
																											ENSOCUG00000001062	108.797	135.567	82.0256	0.605054	-0.724863	6.72043	0.309832	1	0.508874
																											ENSOCUG00000001069	240.838	224.32	257.355	1.14727	0.198203	7.90852	0.730724	1	0.136246
																											ENSOCUG00000001072	47.0772	63.3948	30.7596	0.485207	-1.04333	5.46463	0.295965	1	0.52876
																											ENSOCUG00000001073	1147.9	1477.59	818.206	0.553745	-0.852707	10.1027	0.0596867	1	1.22412
																											ENSOCUG00000001075	2.97593	3.90122	2.05064	0.525641	-0.92785	1.5	0.924992	1	0.0338622
																											ENSOCUG00000001076	82.1507	75.0985	89.2029	1.18781	0.248307	6.35487	0.763409	1	0.117243
																											ENSOCUG00000001078	455.667	503.257	408.078	0.810873	-0.302453	8.82393	0.546431	1	0.262464
																											ENSOCUG00000001081	52.5039	51.6912	53.3167	1.03145	0.044669	5.71418	0.984923	1	0.00659755
																											ENSOCUG00000001082	194.298	159.95	228.646	1.42949	0.515498	7.57923	0.388806	1	0.410267
																											ENSOCUG00000001084	29.4967	29.2591	29.7343	1.01624	0.0232402	4.88244	1	1	0
																											ENSOCUG00000001086	24.4952	24.3826	24.6077	1.00923	0.0132561	4.61441	1	1	0
																											ENSOCUG00000001088	190.334	174.58	206.089	1.18049	0.239386	7.56743	0.694959	1	0.158041
																											ENSOCUG00000001090	139.856	123.864	155.849	1.25823	0.331393	7.11831	0.618074	1	0.208959
																											ENSOCUG00000001093	264.795	249.678	279.912	1.12109	0.164907	8.04638	0.770625	1	0.113157
																											ENSOCUG00000001096	131.254	139.469	123.038	0.882195	-0.180831	7.03338	0.79569	1	0.0992562
																											ENSOCUG00000001097	24.5952	20.4814	28.709	1.40171	0.487187	4.59984	0.73805	1	0.131914
																											ENSOCUG00000001098	2.02563	0.975305	3.07596	3.15385	1.65711	0.792481	0.890414	1	0.0504081
																											ENSOCUG00000001100	31.1597	24.3826	37.9369	1.5559	0.637747	4.92665	0.606946	1	0.21685
																											ENSOCUG00000001101	601.638	568.603	634.673	1.1162	0.158593	9.23057	0.743537	1	0.128697
																											ENSOCUG00000001102	2132.87	2071.55	2194.19	1.0592	0.0829768	11.058	0.849417	1	0.0708788
																											ENSOCUG00000001103	5.38918	9.75305	1.02532	0.105128	-3.24978	1.66096	0.414522	1	0.382452
																											ENSOCUG00000001104	1277.66	1255.22	1300.11	1.03576	0.0506925	10.3191	0.911392	1	0.0402947
																											ENSOCUG00000001106	1845.75	2072.52	1618.98	0.781164	-0.356302	10.839	0.415738	1	0.38118
																											ENSOCUG00000001107	191.235	179.456	203.013	1.13127	0.177944	7.57646	0.772811	1	0.111927
																											ENSOCUG00000001108	1030.65	991.885	1069.41	1.07816	0.108569	10.0083	0.812748	1	0.0900443
																											ENSOCUG00000001109	689.528	719.775	659.281	0.915954	-0.126652	9.42808	0.790953	1	0.10185
																											ENSOCUG00000001110	18.3307	4.87652	31.7849	6.51795	2.70442	3.63806	0.109627	1	0.960083
																											ENSOCUG00000001111	858.356	853.392	863.32	1.01163	0.016687	9.74541	0.973947	1	0.0114645
																											ENSOCUG00000001112	100.869	124.839	76.899	0.615986	-0.699032	6.61441	0.340406	1	0.468003
																											ENSOCUG00000001113	1263.02	1286.43	1239.61	0.963609	-0.0534805	10.3024	0.906533	1	0.0426166
																											ENSOCUG00000001114	2874.34	2405.1	3343.57	1.3902	0.475291	11.4695	0.269246	1	0.569851
																											ENSOCUG00000001116	54.7671	63.3948	46.1394	0.727811	-0.458365	5.75711	0.630606	1	0.200242
																											ENSOCUG00000001119	123.163	115.086	131.241	1.14037	0.189507	6.94132	0.790318	1	0.102198
																											ENSOCUG00000001120	1947.05	2180.78	1713.31	0.785641	-0.348059	10.9166	0.425401	1	0.371201
																											ENSOCUG00000001121	289.778	315.023	264.533	0.839724	-0.252013	8.17331	0.645573	1	0.190055
																											ENSOCUG00000001124	12.9791	13.6543	12.3038	0.901099	-0.150243	3.69616	0.982479	1	0.00767652
																											ENSOCUG00000001125	131.641	104.358	158.925	1.52289	0.606807	7.0088	0.365131	1	0.437551
																											ENSOCUG00000001127	69.2091	79.975	58.4433	0.730769	-0.452512	6.09522	0.598248	1	0.223119
																											ENSOCUG00000001130	69.9969	69.2466	70.7471	1.02167	0.0309271	6.12914	0.989867	1	0.0044231
																											ENSOCUG00000001131	272.348	315.023	229.672	0.729062	-0.455886	8.07137	0.408377	1	0.388938
																											ENSOCUG00000001136	218.118	250.653	185.583	0.740397	-0.433629	7.75274	0.455901	1	0.34113
																											ENSOCUG00000001137	515.061	546.171	483.951	0.886081	-0.17449	9.00596	0.724549	1	0.139932
																											ENSOCUG00000001138	853.004	822.182	883.826	1.07498	0.104305	9.73547	0.823412	1	0.0843831
																											ENSOCUG00000001139	10.4908	10.7284	10.2532	0.955711	-0.0653537	3.39068	1	1	0
																											ENSOCUG00000001142	60.0188	58.5183	61.5192	1.05128	0.0721498	5.90689	0.955506	1	0.0197664
																											ENSOCUG00000001143	157.899	119.962	195.836	1.63248	0.707064	7.25997	0.264052	1	0.57831
																											ENSOCUG00000001144	407.978	323.801	492.154	1.51993	0.604001	8.64097	0.235663	1	0.627708
																											ENSOCUG00000001150	5.92685	8.77774	3.07596	0.350427	-1.51281	2.37744	0.667493	1	0.175553
																											ENSOCUG00000001151	55.0422	52.6665	57.4179	1.09022	0.124617	5.78112	0.912245	1	0.0398886
																											ENSOCUG00000001152	109.284	96.5552	122.013	1.26366	0.337611	6.76209	0.640858	1	0.193238
																											ENSOCUG00000001153	7.53986	5.85183	9.22788	1.57692	0.657112	2.87744	0.847747	1	0.0717335
																											ENSOCUG00000001155	2611.5	2898.61	2324.4	0.801903	-0.3185	11.3419	0.460272	1	0.336986
																											ENSOCUG00000001156	25.3079	12.679	37.9369	2.99211	1.58116	4.45495	0.243802	1	0.612962
																											ENSOCUG00000001158	300.119	291.616	308.621	1.05831	0.0817678	8.22881	0.885167	1	0.0529748
																											ENSOCUG00000001161	546.183	631.998	460.369	0.728435	-0.457129	9.07521	0.348091	1	0.458307
																											ENSOCUG00000001162	4.51391	3.90122	5.1266	1.3141	0.394078	2.16096	0.982353	1	0.00773239
																											ENSOCUG00000001163	141.982	120.938	163.026	1.34801	0.430836	7.13354	0.512138	1	0.290613
																											ENSOCUG00000001164	810.716	751.96	869.472	1.15627	0.209483	9.65925	0.653164	1	0.184978
																											ENSOCUG00000001165	190.022	206.765	173.279	0.83805	-0.254891	7.5644	0.675949	1	0.170086
																											ENSOCUG00000001166	203.601	197.012	210.191	1.0669	0.0934184	7.66885	0.881845	1	0.0546078
																											ENSOCUG00000001168	499.331	479.85	518.812	1.0812	0.112629	8.96275	0.822492	1	0.0848684
																											ENSOCUG00000001169	258.131	329.653	186.608	0.566075	-0.820935	7.95434	0.141354	1	0.849691
																											ENSOCUG00000001170	262.219	270.159	254.279	0.94122	-0.0873961	8.03397	0.881217	1	0.0549169
																											ENSOCUG00000001171	17.4179	20.4814	14.3545	0.700855	-0.512813	4.09984	0.777901	1	0.109076
																											ENSOCUG00000001172	9.54048	7.80244	11.2785	1.44551	0.531581	3.22972	0.856651	1	0.0671961
																											ENSOCUG00000001173	46.527	44.864	48.1901	1.07414	0.103177	5.53908	0.939882	1	0.0269267
																											ENSOCUG00000001174	15.1297	9.75305	20.5064	2.10256	1.07215	3.82193	0.556856	1	0.254257
																											ENSOCUG00000001175	698.743	660.281	737.205	1.1165	0.158986	9.44643	0.738059	1	0.131909
																											ENSOCUG00000001177	375.142	364.764	385.52	1.0569	0.0798442	8.55074	0.881861	1	0.0545998
																											ENSOCUG00000001178	45.4517	46.8146	44.0888	0.941774	-0.086548	5.50561	0.954852	1	0.0200639
																											ENSOCUG00000001179	91.8412	117.037	66.6458	0.569444	-0.812373	6.46463	0.283901	1	0.546833
																											ENSOCUG00000001180	60.9941	60.4689	61.5192	1.01737	0.0248441	5.93054	0.998888	1	0.000483121
																											ENSOCUG00000001181	6.92717	9.75305	4.10128	0.420513	-1.24978	2.66096	0.692517	1	0.159569
																											ENSOCUG00000001183	19.4686	20.4814	18.4558	0.901099	-0.150243	4.28112	0.957687	1	0.0187764
																											ENSOCUG00000001184	68.7465	78.0244	59.4686	0.762179	-0.391797	6.08995	0.651392	1	0.186158
																											ENSOCUG00000001186	575.98	609.566	542.395	0.889805	-0.168439	9.16742	0.729612	1	0.136908
																											ENSOCUG00000001188	134.73	123.864	145.596	1.17545	0.233212	7.06922	0.732394	1	0.135255
																											ENSOCUG00000001190	123.864	87.7774	159.95	1.82222	0.865699	6.88863	0.204827	1	0.688612
																											ENSOCUG00000001191	143.92	145.32	142.52	0.980726	-0.0280777	7.16905	0.977438	1	0.00991076
																											ENSOCUG00000001197	195.336	179.456	211.216	1.17698	0.235088	7.60503	0.698202	1	0.156019
																											ENSOCUG00000001200	57.6805	49.7405	65.6205	1.31926	0.399724	5.83621	0.669674	1	0.174137
																											ENSOCUG00000001201	37.4867	17.5555	57.4179	3.27066	1.70958	4.98864	0.126971	1	0.896295
																											ENSOCUG00000001203	180.531	157.024	204.039	1.29941	0.377858	7.48377	0.537559	1	0.269574
																											ENSOCUG00000001209	2.51329	1.95061	3.07596	1.57692	0.657112	1.29248	0.98818	1	0.00516405
																											ENSOCUG00000001211	77.1866	48.7652	105.608	2.16564	1.11479	6.16518	0.168852	1	0.772495
																											ENSOCUG00000001214	126.227	135.567	116.887	0.862203	-0.213901	6.97592	0.760403	1	0.118956
																											ENSOCUG00000001215	332.229	358.912	305.545	0.85131	-0.232244	8.37137	0.663013	1	0.178478
																											ENSOCUG00000001216	256.168	226.271	286.064	1.26426	0.33829	7.99105	0.546323	1	0.26255
																											ENSOCUG00000001217	127.29	114.111	140.469	1.23099	0.299817	6.9842	0.663169	1	0.178376
																											ENSOCUG00000001218	18.0556	15.6049	20.5064	1.3141	0.394078	4.16096	0.833008	1	0.0793506
																											ENSOCUG00000001219	6.53954	4.87652	8.20256	1.68205	0.750222	2.66096	0.841919	1	0.0747295
																											ENSOCUG00000001220	1009.65	990.91	1028.4	1.03783	0.053571	9.9794	0.908386	1	0.0417296
																											ENSOCUG00000001221	104.52	102.407	106.633	1.04127	0.058344	6.70734	0.949592	1	0.022463
																											ENSOCUG00000001223	50.4283	52.6665	48.1901	0.915005	-0.128149	5.65474	0.914446	1	0.0388419
																											ENSOCUG00000001224	11.0284	9.75305	12.3038	1.26154	0.335184	3.45345	0.91576	1	0.0382183
																											ENSOCUG00000001225	6.61457	1.95061	11.2785	5.78205	2.53158	2.22972	0.431494	1	0.365025
																											ENSOCUG00000001227	7.48984	7.80244	7.17724	0.919872	-0.120495	2.90368	1	1	0
																											ENSOCUG00000001228	131.854	116.061	147.646	1.27214	0.347257	7.03237	0.607923	1	0.216151
																											ENSOCUG00000001229	8.02751	6.82713	9.22788	1.35165	0.43472	2.98864	0.912538	1	0.039749
																											ENSOCUG00000001231	1.97562	2.92591	1.02532	0.350427	-1.51281	0.792481	0.911891	1	0.0400571
																											ENSOCUG00000001232	3703.55	3015.64	4391.45	1.45622	0.542231	11.8294	0.204448	1	0.689418
																											ENSOCUG00000001233	117.062	113.135	120.988	1.06941	0.0968118	6.87031	0.900998	1	0.0452761
																											ENSOCUG00000001234	496.305	437.912	554.698	1.26669	0.341063	8.94503	0.490258	1	0.309575
																											ENSOCUG00000001236	23.9825	24.3826	23.5824	0.967179	-0.0481444	4.58371	1	1	0
																											ENSOCUG00000001239	91.5661	87.7774	95.3548	1.08632	0.119456	6.51551	0.888119	1	0.051529
																											ENSOCUG00000001241	39.3873	23.4073	55.3673	2.36538	1.24207	5.16993	0.251669	1	0.599171
																											ENSOCUG00000001242	1373.64	1590.72	1156.56	0.727067	-0.45984	10.4055	0.301823	1	0.520248
																											ENSOCUG00000001246	61.0566	78.0244	44.0888	0.565064	-0.823514	5.8741	0.355654	1	0.448972
																											ENSOCUG00000001247	42.8134	49.7405	35.8862	0.721468	-0.470993	5.40085	0.660683	1	0.180007
																											ENSOCUG00000001249	509.197	394.998	623.395	1.57822	0.658299	8.95485	0.18109	1	0.742106
																											ENSOCUG00000001250	592.735	515.936	669.534	1.29771	0.375965	9.19903	0.435402	1	0.361109
																											ENSOCUG00000001251	28.1588	21.4567	34.8609	1.62471	0.700181	4.77345	0.590731	1	0.22861
																											ENSOCUG00000001254	77.7618	66.3207	89.2029	1.34502	0.42763	6.2652	0.601557	1	0.220723
																											ENSOCUG00000001256	3.00094	2.92591	3.07596	1.05128	0.0721498	1.58496	1	1	0
																											ENSOCUG00000001257	4.51391	3.90122	5.1266	1.3141	0.394078	2.16096	0.982353	1	0.00773239
																											ENSOCUG00000001258	55.3048	62.4195	48.1901	0.772035	-0.373261	5.77729	0.697721	1	0.156318
																											ENSOCUG00000001264	48.8403	54.6171	43.0635	0.788462	-0.342888	5.59984	0.738986	1	0.131364
																											ENSOCUG00000001265	8.02751	6.82713	9.22788	1.35165	0.43472	2.98864	0.912538	1	0.039749
																											ENSOCUG00000001266	139.594	154.098	125.089	0.811749	-0.300894	7.11726	0.652084	1	0.185697
																											ENSOCUG00000001267	321.701	329.653	313.748	0.951752	-0.0713418	8.32913	0.898832	1	0.0463213
																											ENSOCUG00000001269	521.488	615.417	427.559	0.694746	-0.525443	9.0027	0.283905	1	0.546827
																											ENSOCUG00000001270	47.2523	56.5677	37.9369	0.670645	-0.576378	5.53372	0.568354	1	0.245381
																											ENSOCUG00000001271	553.01	565.677	540.344	0.955217	-0.0661002	9.11078	0.895303	1	0.04803
																											ENSOCUG00000001272	190.647	182.382	198.912	1.09063	0.125168	7.5734	0.842161	1	0.0746051
																											ENSOCUG00000001277	3.05095	0.975305	5.1266	5.25641	2.39408	1.16096	0.708261	1	0.149807
																											ENSOCUG00000001278	15.5424	13.6543	17.4304	1.27656	0.352258	3.94741	0.871831	1	0.0595678
																											ENSOCUG00000001279	42.7134	53.6418	31.7849	0.592541	-0.755014	5.36778	0.471911	1	0.32614
																											ENSOCUG00000001280	9868.2	10996.6	8739.83	0.794779	-0.331375	13.2591	0.429809	1	0.366724
																											ENSOCUG00000001281	250.553	225.295	275.811	1.22422	0.291863	7.96161	0.605489	1	0.217894
																											ENSOCUG00000001284	107.296	114.111	100.481	0.880561	-0.183505	6.74254	0.807824	1	0.0926833
																											ENSOCUG00000001286	2427.32	2284.16	2570.48	1.12535	0.170371	11.2426	0.693902	1	0.158702
																											ENSOCUG00000001288	3524.41	3443.8	3605.03	1.04682	0.066008	11.7828	0.877698	1	0.0566548
																											ENSOCUG00000001289	226.533	262.357	190.71	0.726909	-0.460154	7.80531	0.424155	1	0.372475
																											ENSOCUG00000001290	82.5008	61.4442	103.557	1.68539	0.753081	6.31775	0.33986	1	0.4687
																											ENSOCUG00000001292	1150.35	1222.06	1078.64	0.882641	-0.180102	10.165	0.690258	1	0.160989
																											ENSOCUG00000001294	1.00031	0.975305	1.02532	1.05128	0.0721498	1.28137e-15	1	1	0
																											ENSOCUG00000001295	612.254	534.467	690.041	1.29108	0.36858	9.24625	0.442603	1	0.353986
																											ENSOCUG00000001296	109.184	100.456	117.912	1.17376	0.231139	6.766	0.753866	1	0.122706
																											ENSOCUG00000001297	895.567	961.651	829.484	0.862563	-0.213298	9.80272	0.643938	1	0.191156
																											ENSOCUG00000001299	346.671	415.48	277.862	0.668773	-0.580411	8.40843	0.268414	1	0.571195
																											ENSOCUG00000001300	8.41513	11.7037	5.1266	0.438034	-1.19088	2.95345	0.661871	1	0.179227
																											ENSOCUG00000001302	128.915	130.691	127.14	0.972828	-0.0397431	7.01014	0.96547	1	0.0152614
																											ENSOCUG00000001303	1588.46	1490.27	1686.65	1.13178	0.178593	10.6307	0.686163	1	0.163573
																											ENSOCUG00000001304	162.488	120.938	204.039	1.68714	0.754578	7.29541	0.229416	1	0.639377
																											ENSOCUG00000001305	231.185	280.888	181.482	0.6461	-0.63017	7.81877	0.270637	1	0.567613
																											ENSOCUG00000001306	409.591	480.825	338.356	0.703698	-0.506972	8.65588	0.319305	1	0.495794
																											ENSOCUG00000001307	85.7268	95.5799	75.8737	0.793825	-0.333107	6.41208	0.675671	1	0.170265
																											ENSOCUG00000001309	66.8209	73.1479	60.4939	0.827009	-0.274026	6.05573	0.760649	1	0.118816
																											ENSOCUG00000001310	55.0172	53.6418	56.3926	1.05128	0.0721498	5.78136	0.958975	1	0.0181927
																											ENSOCUG00000001311	257.105	289.666	224.545	0.775188	-0.367382	7.99455	0.511664	1	0.291016
																											ENSOCUG00000001315	158.074	193.11	123.038	0.637141	-0.650316	7.26812	0.30452	1	0.516385
																											ENSOCUG00000001316	863.72	864.12	863.32	0.999074	-0.00133668	9.75442	1	1	0
																											ENSOCUG00000001317	50.8909	54.6171	47.1647	0.863553	-0.211643	5.66546	0.842651	1	0.0743524
																											ENSOCUG00000001319	356.987	353.06	360.913	1.02224	0.0317355	8.47964	0.957181	1	0.0190059
																											ENSOCUG00000001320	48.6902	60.4689	36.9115	0.610422	-0.712122	5.56206	0.47126	1	0.32674
																											ENSOCUG00000001324	2471.15	2474.35	2467.95	0.997413	-0.00373759	11.271	0.994165	1	0.00254166
																											ENSOCUG00000001326	740.719	682.713	798.725	1.16993	0.226418	9.52835	0.630355	1	0.200415
																											ENSOCUG00000001328	130.628	123.864	137.393	1.10923	0.149554	7.02739	0.832906	1	0.0794041
																											ENSOCUG00000001331	5.02657	3.90122	6.15192	1.57692	0.657112	2.29248	0.905977	1	0.0428828
																											ENSOCUG00000001334	1519.89	1365.43	1674.35	1.22625	0.294248	10.5623	0.506068	1	0.295791
																											ENSOCUG00000001335	20.6189	15.6049	25.633	1.64263	0.716006	4.32193	0.645286	1	0.190248
																											ENSOCUG00000001336	538.081	468.146	608.015	1.29877	0.377147	9.05939	0.439954	1	0.356593
																											ENSOCUG00000001337	76.0238	74.1232	77.9244	1.05128	0.0721498	6.24793	0.946188	1	0.0240224
																											ENSOCUG00000001338	333.592	325.752	341.432	1.04813	0.0678239	8.38154	0.903216	1	0.0442086
																											ENSOCUG00000001341	2.02563	0.975305	3.07596	3.15385	1.65711	0.792481	0.890414	1	0.0504081
																											ENSOCUG00000001343	637.124	664.183	610.066	0.918521	-0.122615	9.31413	0.799627	1	0.0971125
																											ENSOCUG00000001349	447.14	475.949	418.331	0.878941	-0.186162	8.80158	0.71299	1	0.146916
																											ENSOCUG00000001350	6.51454	5.85183	7.17724	1.2265	0.294542	2.69616	0.977826	1	0.00973838
																											ENSOCUG00000001351	1.51297	0.975305	2.05064	2.10256	1.07215	0.5	0.991961	1	0.00350522
																											ENSOCUG00000001352	346.233	372.566	319.9	0.858639	-0.219877	8.43142	0.677695	1	0.168966
																											ENSOCUG00000001357	429.434	366.715	492.154	1.34206	0.424452	8.73074	0.400797	1	0.397075
																											ENSOCUG00000001360	10.4158	13.6543	7.17724	0.525641	-0.92785	3.30735	0.698229	1	0.156002
																											ENSOCUG00000001362	124.201	134.592	113.811	0.845596	-0.241959	6.95147	0.729995	1	0.13668
																											ENSOCUG00000001366	19.7562	29.2591	10.2532	0.350427	-1.51281	4.11441	0.330019	1	0.481461
																											ENSOCUG00000001368	2.00063	1.95061	2.05064	1.05128	0.0721498	1	1	1	0
																											ENSOCUG00000001375	434.611	404.752	464.47	1.14754	0.198549	8.76017	0.69588	1	0.157466
																											ENSOCUG00000001378	44.0263	62.4195	25.633	0.410657	-1.28399	5.32193	0.213093	1	0.671431
																											ENSOCUG00000001379	17.0303	15.6049	18.4558	1.18269	0.242075	4.08496	0.918156	1	0.0370836
																											ENSOCUG00000001382	136.068	131.666	140.469	1.06686	0.0933663	7.08742	0.898426	1	0.0465177
																											ENSOCUG00000001383	707.834	685.639	730.028	1.06474	0.0905023	9.46656	0.850225	1	0.0704662
																											ENSOCUG00000001384	31.4473	33.1604	29.7343	0.896682	-0.157332	4.97272	0.922055	1	0.0352433
																											ENSOCUG00000001386	440.825	462.294	419.356	0.907119	-0.140636	8.78235	0.782812	1	0.106343
																											ENSOCUG00000001389	9.17787	1.95061	16.4051	8.41026	3.07215	2.5	0.243816	1	0.612938
																											ENSOCUG00000001390	1584.8	1693.13	1476.46	0.872031	-0.197548	10.6267	0.654834	1	0.183869
																											ENSOCUG00000001391	103.67	95.5799	111.76	1.16928	0.225624	6.69145	0.764599	1	0.116567
																											ENSOCUG00000001392	193.298	198.962	187.634	0.943062	-0.0845757	7.59406	0.895772	1	0.0478026
																											ENSOCUG00000001393	6.56455	3.90122	9.22788	2.36538	1.24207	2.58496	0.705852	1	0.151287
																											ENSOCUG00000001396	3180.79	3909.02	2452.57	0.627412	-0.672515	11.5963	0.117586	1	0.929645
																											ENSOCUG00000001397	393.836	415.48	372.191	0.895811	-0.158734	8.61927	0.759898	1	0.119245
																											ENSOCUG00000001398	292.279	297.468	287.09	0.965111	-0.0512326	8.19097	0.931147	1	0.030982
																											ENSOCUG00000001401	1237.26	1171.34	1303.18	1.11256	0.153878	10.2709	0.732304	1	0.135309
																											ENSOCUG00000001402	368.703	355.986	381.419	1.07144	0.0995559	8.52546	0.852085	1	0.069517
																											ENSOCUG00000001405	307.571	280.888	334.254	1.18999	0.250953	8.25933	0.642615	1	0.192049
																											ENSOCUG00000001406	99.7812	107.284	92.2788	0.86014	-0.217357	6.63661	0.777023	1	0.109566
																											ENSOCUG00000001408	34.1857	26.3332	42.0381	1.59639	0.674814	5.05622	0.566261	1	0.246983
																											ENSOCUG00000001409	539.018	531.541	546.496	1.02813	0.0400291	9.07405	0.938487	1	0.0275718
																											ENSOCUG00000001414	1704.13	1597.55	1810.72	1.13343	0.1807	10.732	0.681428	1	0.16658
																											ENSOCUG00000001415	9.00281	8.77774	9.22788	1.05128	0.0721498	3.16993	1	1	0
																											ENSOCUG00000001418	295.067	328.678	261.457	0.79548	-0.330102	8.19548	0.543628	1	0.264698
																											ENSOCUG00000001419	830.597	776.343	884.852	1.13977	0.188742	9.69492	0.685062	1	0.16427
																											ENSOCUG00000001420	132.854	117.037	148.671	1.2703	0.345168	7.0434	0.609241	1	0.215211
																											ENSOCUG00000001422	164.376	187.259	141.494	0.755609	-0.404288	7.34674	0.520597	1	0.283498
																											ENSOCUG00000001424	3.00094	2.92591	3.07596	1.05128	0.0721498	1.58496	1	1	0
																											ENSOCUG00000001425	318.712	266.258	371.166	1.39401	0.479239	8.2963	0.368683	1	0.433346
																											ENSOCUG00000001426	223.807	248.703	198.912	0.799799	-0.322291	7.79713	0.578578	1	0.237638
																											ENSOCUG00000001427	69.3842	73.1479	65.6205	0.897094	-0.156669	6.11441	0.867781	1	0.06159
																											ENSOCUG00000001428	162.676	173.604	151.747	0.8741	-0.19413	7.34259	0.763746	1	0.117051
																											ENSOCUG00000001429	47.3773	51.6912	43.0635	0.833091	-0.263453	5.56012	0.806595	1	0.0933444
																											ENSOCUG00000001430	1228.82	1200.6	1257.04	1.04701	0.066278	10.2627	0.884087	1	0.0535052
																											ENSOCUG00000001432	1201.06	1203.53	1198.6	0.995907	-0.00591768	10.2301	0.991591	1	0.00366755
																											ENSOCUG00000001434	213.867	216.518	211.216	0.975514	-0.0357656	7.74046	0.95969	1	0.017869
																											ENSOCUG00000001435	927.915	959.7	896.13	0.933761	-0.0988753	9.857	0.831142	1	0.0803248
																											ENSOCUG00000001436	188.746	256.505	120.988	0.471678	-1.08413	7.46078	0.0731752	1	1.13564
																											ENSOCUG00000001437	44.7265	35.111	54.342	1.54772	0.630145	5.44892	0.541487	1	0.266412
																											ENSOCUG00000001438	190.985	149.222	232.748	1.55975	0.64131	7.54197	0.285342	1	0.544635
																											ENSOCUG00000001439	1330.32	1540.98	1119.65	0.726582	-0.460802	10.3592	0.301826	1	0.520244
																											ENSOCUG00000001443	292.854	235.048	350.66	1.49186	0.577113	8.16537	0.287132	1	0.541919
																											ENSOCUG00000001444	634.823	633.948	635.699	1.00276	0.00397828	9.31021	0.99713	1	0.00124812
																											ENSOCUG00000001446	51.8662	56.5677	47.1647	0.833775	-0.262269	5.69077	0.798103	1	0.0979409
																											ENSOCUG00000001447	941.294	1037.72	844.864	0.814151	-0.296632	9.87089	0.51774	1	0.285888
																											ENSOCUG00000001452	43.3761	47.7899	38.9622	0.81528	-0.294633	5.43132	0.791436	1	0.101584
																											ENSOCUG00000001455	2982.93	2908.36	3057.51	1.05128	0.0721498	11.5421	0.86711	1	0.0619257
																											ENSOCUG00000001456	178.031	174.58	181.482	1.03954	0.0559396	7.47571	0.936567	1	0.0284613
																											ENSOCUG00000001458	89.0028	87.7774	90.2282	1.02792	0.0397283	6.47564	0.97479	1	0.0110887
																											ENSOCUG00000001459	228.546	243.826	213.267	0.874667	-0.193195	7.83311	0.740978	1	0.130195
																											ENSOCUG00000001460	274.198	282.838	265.558	0.938904	-0.090951	8.09836	0.874585	1	0.058198
																											ENSOCUG00000001461	14.9797	15.6049	14.3545	0.919872	-0.120495	3.90368	0.988328	1	0.00509878
																											ENSOCUG00000001462	14.292	22.432	6.15192	0.274247	-1.86645	3.55426	0.322441	1	0.491549
																											ENSOCUG00000001464	389.084	400.85	377.318	0.941294	-0.0872828	8.60328	0.869409	1	0.060776
																											ENSOCUG00000001465	45.9769	66.3207	25.633	0.386501	-1.37146	5.36566	0.175647	1	0.755359
																											ENSOCUG00000001466	352.048	325.752	378.343	1.16145	0.215922	8.45559	0.682223	1	0.166074
																											ENSOCUG00000001467	357.774	382.319	333.229	0.871599	-0.198264	8.4795	0.706565	1	0.150848
																											ENSOCUG00000001468	2419.01	2628.45	2209.57	0.840636	-0.250448	11.2348	0.562661	1	0.249753
																											ENSOCUG00000001469	438.312	420.356	456.268	1.08543	0.118267	8.7746	0.817646	1	0.0874346
																											ENSOCUG00000001470	278.149	248.703	307.596	1.2368	0.306615	8.11159	0.577921	1	0.238131
																											ENSOCUG00000001473	26.9209	9.75305	44.0888	4.52051	2.17649	4.3741	0.104577	1	0.980563
																											ENSOCUG00000001475	899.469	929.466	869.472	0.935453	-0.0962622	9.81213	0.836136	1	0.0777233
																											ENSOCUG00000001478	112.323	118.012	106.633	0.903581	-0.146274	6.80965	0.846372	1	0.0724387
																											ENSOCUG00000001479	1197.16	1515.62	878.7	0.579761	-0.78647	10.1725	0.0811762	1	1.09057
																											ENSOCUG00000001480	94.2545	82.9009	105.608	1.27391	0.349259	6.54795	0.647747	1	0.188595
																											ENSOCUG00000001481	38.5871	54.6171	22.5571	0.413004	-1.27577	5.13339	0.244613	1	0.61152
																											ENSOCUG00000001486	11.4661	12.679	10.2532	0.808679	-0.306362	3.51118	0.924219	1	0.034225
																											ENSOCUG00000001488	25.9581	27.3085	24.6077	0.901099	-0.150243	4.69616	0.939446	1	0.0271281
																											ENSOCUG00000001489	161.4	183.357	139.444	0.760502	-0.394976	7.32103	0.532667	1	0.273545
																											ENSOCUG00000001490	1314.8	1246.44	1383.16	1.10969	0.150152	10.3587	0.73746	1	0.132262
																											ENSOCUG00000001496	427.784	431.085	424.483	0.984685	-0.0222658	8.74069	0.969896	1	0.0132747
																											ENSOCUG00000001497	5.05158	2.92591	7.17724	2.45299	1.29454	2.19616	0.754232	1	0.122495
																											ENSOCUG00000001498	484.064	535.442	432.685	0.808089	-0.307413	8.91088	0.535954	1	0.270873
																											ENSOCUG00000001499	147.008	124.839	169.178	1.35517	0.438472	7.18316	0.499864	1	0.301149
																											ENSOCUG00000001500	425.671	413.529	437.812	1.05872	0.0823216	8.73301	0.874784	1	0.0580993
																											ENSOCUG00000001501	28.0338	26.3332	29.7343	1.12915	0.175243	4.80643	0.917793	1	0.0372551
																											ENSOCUG00000001504	1573.98	1535.13	1612.83	1.05061	0.0712329	10.6198	0.872983	1	0.0589941
																											ENSOCUG00000001513	164.802	170.678	158.925	0.931136	-0.102937	7.36367	0.878083	1	0.0564647
																											ENSOCUG00000001515	5.07659	1.95061	8.20256	4.20513	2.07215	2	0.597734	1	0.223492
																											ENSOCUG00000001517	200.375	202.863	197.887	0.975468	-0.0358329	7.64645	0.960857	1	0.0173412
																											ENSOCUG00000001518	3.02595	1.95061	4.10128	2.10256	1.07215	1.5	0.897402	1	0.0470132
																											ENSOCUG00000001519	154.298	180.431	128.165	0.710326	-0.493447	7.24858	0.440273	1	0.356278
																											ENSOCUG00000001524	78.9747	78.9997	78.9497	0.999367	-0.000913676	6.30332	1	1	0
																											ENSOCUG00000001530	940.907	952.873	928.94	0.974884	-0.0366977	9.87779	0.938509	1	0.0275616
																											ENSOCUG00000001532	185.233	173.604	196.862	1.13397	0.181379	7.53035	0.770516	1	0.113218
																											ENSOCUG00000001535	194.361	177.505	211.216	1.18991	0.250856	7.59715	0.678895	1	0.168197
																											ENSOCUG00000001536	93.6543	66.3207	120.988	1.82428	0.86733	6.48505	0.248752	1	0.604233
																											ENSOCUG00000001537	204.814	209.691	199.937	0.953488	-0.0687128	7.67776	0.915348	1	0.0384138
																											ENSOCUG00000001539	3.02595	1.95061	4.10128	2.10256	1.07215	1.5	0.897402	1	0.0470132
																											ENSOCUG00000001540	435.386	414.505	456.268	1.10075	0.138492	8.76449	0.786551	1	0.104273
																											ENSOCUG00000001541	53.7668	62.4195	45.1141	0.722756	-0.468419	5.72972	0.625711	1	0.203626
																											ENSOCUG00000001542	63.4323	65.3454	61.5192	0.941447	-0.0870488	5.98649	0.939328	1	0.0271826
																											ENSOCUG00000001543	134.942	175.555	94.3295	0.537322	-0.896141	7.00771	0.177781	1	0.750116
																											ENSOCUG00000001544	272.298	236.999	307.596	1.29788	0.376156	8.07682	0.495762	1	0.304727
																											ENSOCUG00000001545	58.1057	73.1479	43.0635	0.588718	-0.764351	5.81057	0.401809	1	0.395981
																											ENSOCUG00000001548	3.02595	1.95061	4.10128	2.10256	1.07215	1.5	0.897402	1	0.0470132
																											ENSOCUG00000001551	3296.13	3049.78	3542.48	1.16155	0.216056	11.6825	0.613779	1	0.211988
																											ENSOCUG00000001552	24.5202	23.4073	25.633	1.09509	0.131043	4.61441	0.954912	1	0.0200365
																											ENSOCUG00000001553	424.133	453.517	394.748	0.870416	-0.200222	8.7249	0.694681	1	0.158214
																											ENSOCUG00000001554	255.567	249.678	261.457	1.04718	0.0665032	7.99718	0.912046	1	0.0399835
																											ENSOCUG00000001560	511.747	535.442	488.053	0.911494	-0.133695	8.99774	0.788378	1	0.103266
																											ENSOCUG00000001561	58.1307	32.1851	84.0763	2.61228	1.38531	5.70097	0.129196	1	0.888751
																											ENSOCUG00000001565	969.878	962.626	977.13	1.01507	0.0215759	9.92162	0.964753	1	0.0155837
																											ENSOCUG00000001568	1434.69	1489.29	1380.08	0.92667	-0.109872	10.4855	0.805546	1	0.0939097
																											ENSOCUG00000001570	730.378	826.083	634.673	0.768292	-0.380273	9.50001	0.418576	1	0.378225
																											ENSOCUG00000001571	857.418	909.959	804.877	0.884519	-0.177035	9.74114	0.702897	1	0.153108
																											ENSOCUG00000001574	257.368	299.419	215.317	0.719118	-0.4757	7.98817	0.394226	1	0.404254
																											ENSOCUG00000001575	128.628	81.9256	175.33	2.14011	1.09768	6.90508	0.104613	1	0.980415
																											ENSOCUG00000001576	347.384	367.69	327.077	0.889546	-0.168858	8.43792	0.750783	1	0.124486
																											ENSOCUG00000001578	1321.28	1353.72	1288.83	0.952062	-0.0708731	10.3673	0.875242	1	0.0578719
																											ENSOCUG00000001581	119.637	132.641	106.633	0.803922	-0.314873	6.89395	0.654032	1	0.184401
																											ENSOCUG00000001582	35.8987	59.4936	12.3038	0.20681	-2.27363	4.75785	0.0526086	1	1.27894
																											ENSOCUG00000001583	279.537	334.53	224.545	0.671227	-0.575128	8.09843	0.293745	1	0.532029
																											ENSOCUG00000001584	1.48797	1.95061	1.02532	0.525641	-0.92785	0.5	1	1	0
																											ENSOCUG00000001585	598.124	565.677	630.572	1.11472	0.156683	9.22218	0.746761	1	0.126818
																											ENSOCUG00000001586	181.432	161.901	200.963	1.24127	0.31182	7.49487	0.611838	1	0.213363
																											ENSOCUG00000001587	35.4861	55.5924	15.3798	0.276653	-1.85385	4.86989	0.109437	1	0.960837
																											ENSOCUG00000001588	121.751	150.197	93.3042	0.621212	-0.686842	6.88729	0.317553	1	0.498183
																											ENSOCUG00000001590	374.304	377.443	371.166	0.98337	-0.0241941	8.54802	0.968296	1	0.0139918
																											ENSOCUG00000001591	340.656	390.122	291.191	0.74641	-0.421959	8.3968	0.423012	1	0.373647
																											ENSOCUG00000001592	415.33	396.949	433.711	1.09261	0.127779	8.6967	0.804772	1	0.0943269
																											ENSOCUG00000001594	267.884	309.172	226.596	0.732913	-0.448287	8.04812	0.418008	1	0.378816
																											ENSOCUG00000001595	366.877	427.184	306.571	0.717656	-0.478636	8.49939	0.356483	1	0.447961
																											ENSOCUG00000001598	2295.08	2723.05	1867.11	0.685668	-0.544418	11.1388	0.209696	1	0.67841
																											ENSOCUG00000001601	27.8837	32.1851	23.5824	0.732712	-0.448682	4.78398	0.742521	1	0.129292
																											ENSOCUG00000001604	149.972	149.222	150.722	1.01006	0.0144343	7.22853	0.993904	1	0.00265568
																											ENSOCUG00000001605	422.407	360.863	483.951	1.34109	0.423411	8.70701	0.403242	1	0.394434
																											ENSOCUG00000001606	29204.7	24934.6	33474.7	1.3425	0.424918	14.8183	0.308424	1	0.510852
																											ENSOCUG00000001610	35.9612	37.0616	34.8609	0.940621	-0.0883149	5.1677	0.964154	1	0.0158534
																											ENSOCUG00000001613	135.742	144.345	127.14	0.880804	-0.183107	7.08182	0.790522	1	0.102086
																											ENSOCUG00000001620	1859.73	2007.18	1712.29	0.853081	-0.229245	10.8563	0.600562	1	0.221442
																											ENSOCUG00000001622	108.509	126.79	90.2282	0.711637	-0.490786	6.7409	0.49431	1	0.306
																											ENSOCUG00000001628	1094.37	1145.98	1042.75	0.909918	-0.136191	10.0943	0.764588	1	0.116573
																											ENSOCUG00000001629	333.804	377.443	290.166	0.768767	-0.379382	8.37042	0.473387	1	0.324783
																											ENSOCUG00000001633	617.005	629.072	604.939	0.961638	-0.0564344	9.26886	0.909498	1	0.0411984
																											ENSOCUG00000001636	118.925	100.456	137.393	1.36769	0.451738	6.87629	0.516468	1	0.286956
																											ENSOCUG00000001638	2.53829	0.975305	4.10128	4.20513	2.07215	1	0.795789	1	0.0992023
																											ENSOCUG00000001645	1202	1226.93	1177.07	0.959358	-0.0598595	10.2309	0.895657	1	0.0478584
																											ENSOCUG00000001646	770.728	751.96	789.497	1.04992	0.0702774	9.58965	0.882878	1	0.0540995
																											ENSOCUG00000001651	368.365	389.147	347.584	0.893195	-0.162954	8.52269	0.756647	1	0.121106
																											ENSOCUG00000001652	116.174	167.752	64.5952	0.385063	-1.37684	6.70177	0.0505581	1	1.29621
																											ENSOCUG00000001655	3.00094	2.92591	3.07596	1.05128	0.0721498	1.58496	1	1	0
																											ENSOCUG00000001656	291.554	285.764	297.343	1.04052	0.057302	8.18733	0.922184	1	0.0351826
																											ENSOCUG00000001657	111.735	120.938	102.532	0.847808	-0.23819	6.79903	0.744121	1	0.128356
																											ENSOCUG00000001660	22.0069	21.4567	22.5571	1.05128	0.0721498	4.45943	0.996082	1	0.00170496
																											ENSOCUG00000001661	2858.49	3362.85	2354.14	0.700042	-0.514487	11.4582	0.231983	1	0.634543
																											ENSOCUG00000001662	1.97562	2.92591	1.02532	0.350427	-1.51281	0.792481	0.911891	1	0.0400571
																											ENSOCUG00000001665	57.0928	52.6665	61.5192	1.16809	0.224153	5.83089	0.821289	1	0.0855041
																											ENSOCUG00000001667	4377.46	4924.31	3830.6	0.777895	-0.362353	12.0845	0.393944	1	0.404566
																											ENSOCUG00000001669	81.6005	96.5552	66.6458	0.690236	-0.534839	6.32586	0.502617	1	0.298762
																											ENSOCUG00000001670	570.141	537.393	602.888	1.12188	0.165914	9.15279	0.733909	1	0.134358
																											ENSOCUG00000001671	308.872	270.159	347.584	1.28659	0.363549	8.25944	0.498875	1	0.302008
																											ENSOCUG00000001672	98.3057	84.8515	111.76	1.31712	0.397391	6.60556	0.595458	1	0.225149
																											ENSOCUG00000001673	268.721	216.518	320.925	1.48221	0.567753	8.04222	0.303994	1	0.517135
																											ENSOCUG00000001674	11.9537	13.6543	10.2532	0.750916	-0.413277	3.56464	0.874858	1	0.0580623
																											ENSOCUG00000001675	229.209	237.974	220.444	0.926335	-0.110395	7.83947	0.853766	1	0.0686613
																											ENSOCUG00000001676	124.264	112.16	136.368	1.21583	0.281942	6.95039	0.685352	1	0.164086
																											ENSOCUG00000001677	154.086	128.74	179.431	1.39375	0.478967	7.2478	0.453965	1	0.342977
																											ENSOCUG00000001678	2530.35	2464.6	2596.11	1.05336	0.0750015	11.3046	0.862773	1	0.0641035
																											ENSOCUG00000001680	10.4908	10.7284	10.2532	0.955711	-0.0653537	3.39068	1	1	0
																											ENSOCUG00000001681	19.5436	17.5555	21.5317	1.2265	0.294542	4.28112	0.877303	1	0.0568506
																											ENSOCUG00000001682	30.547	28.2838	32.8103	1.16004	0.214169	4.92899	0.884868	1	0.0531214
																											ENSOCUG00000001683	255.968	234.073	277.862	1.18707	0.247408	7.99452	0.660907	1	0.17986
																											ENSOCUG00000001684	371.741	417.43	326.052	0.781093	-0.356434	8.52717	0.49195	1	0.308079
																											ENSOCUG00000001685	195.861	158.975	232.748	1.46406	0.54997	7.58764	0.356626	1	0.447787
																											ENSOCUG00000001686	98.9434	119.962	77.9244	0.649573	-0.622437	6.59522	0.399806	1	0.398151
																											ENSOCUG00000001687	153.648	125.814	181.482	1.44246	0.528528	7.23942	0.40845	1	0.388861
																											ENSOCUG00000001688	7.82745	14.6296	1.02532	0.0700855	-3.83474	1.95345	0.224478	1	0.648826
																											ENSOCUG00000001691	762.463	734.405	790.522	1.07641	0.106231	9.57355	0.822408	1	0.0849127
																											ENSOCUG00000001692	1228.87	1238.64	1219.11	0.984232	-0.02293	10.2631	0.961147	1	0.0172102
																											ENSOCUG00000001693	550.485	464.245	636.724	1.37153	0.455781	9.08663	0.34891	1	0.457287
																											ENSOCUG00000001696	223.157	234.073	212.241	0.906731	-0.141254	7.80019	0.812546	1	0.0901521
																											ENSOCUG00000001697	187.158	218.468	155.849	0.71337	-0.487278	7.52764	0.420455	1	0.37628
																											ENSOCUG00000001698	184.045	199.937	168.153	0.841026	-0.249778	7.51852	0.685042	1	0.164283
																											ENSOCUG00000001699	362.413	341.357	383.47	1.12337	0.167833	8.49905	0.750175	1	0.124837
																											ENSOCUG00000001701	19.206	10.7284	27.6837	2.58042	1.36761	4.10716	0.384418	1	0.415197
																											ENSOCUG00000001710	365.702	393.048	338.356	0.860851	-0.216164	8.51048	0.679689	1	0.16769
																											ENSOCUG00000001711	562.426	618.343	506.508	0.819138	-0.287822	9.12835	0.553839	1	0.256617
																											ENSOCUG00000001712	100.394	103.382	97.4054	0.942187	-0.0859151	6.64889	0.920253	1	0.0360928
																											ENSOCUG00000001715	7.97749	8.77774	7.17724	0.817664	-0.29042	2.98864	0.962684	1	0.0165162
																											ENSOCUG00000001717	9.39043	13.6543	5.1266	0.375458	-1.41328	3.06464	0.568365	1	0.245372
																											ENSOCUG00000001718	1216.28	1109.9	1322.66	1.1917	0.25302	10.2427	0.573305	1	0.241614
																											ENSOCUG00000001719	23.8324	30.2344	17.4304	0.57651	-0.794584	4.52083	0.575873	1	0.239673
																											ENSOCUG00000001724	318.224	265.283	371.166	1.39913	0.484533	8.29365	0.363542	1	0.439445
																											ENSOCUG00000001725	3343.67	3275.07	3412.27	1.04189	0.059203	11.7069	0.890494	1	0.0503692
																											ENSOCUG00000001726	191.11	184.333	197.887	1.07353	0.102364	7.57735	0.872362	1	0.0593033
																											ENSOCUG00000001727	114.536	91.6787	137.393	1.49864	0.58365	6.81034	0.405815	1	0.391671
																											ENSOCUG00000001729	687.715	730.503	644.927	0.882852	-0.179756	9.42287	0.705511	1	0.151496
																											ENSOCUG00000001730	552.548	523.739	581.357	1.11001	0.150576	9.10799	0.759126	1	0.119686
																											ENSOCUG00000001732	33.1604	26.3332	39.9875	1.51852	0.602665	5.02014	0.616554	1	0.210029
																											ENSOCUG00000001734	333.092	345.258	320.925	0.929523	-0.105437	8.37881	0.846557	1	0.0723436
																											ENSOCUG00000001735	6062.54	5365.15	6759.94	1.25997	0.333391	12.5561	0.429908	1	0.366624
																											ENSOCUG00000001736	172.954	172.629	173.279	1.00377	0.00542367	7.43424	1	1	0
																											ENSOCUG00000001738	49.9406	51.6912	48.1901	0.932269	-0.101182	5.64125	0.938061	1	0.0277691
																											ENSOCUG00000001741	243.651	254.555	232.748	0.914333	-0.129208	7.92723	0.824832	1	0.0836347
																											ENSOCUG00000001742	14.9547	16.5802	13.3292	0.803922	-0.314873	3.89395	0.894346	1	0.0484942
																											ENSOCUG00000001748	20.669	13.6543	27.6837	2.02747	1.01968	4.28112	0.501697	1	0.299558
																											ENSOCUG00000001750	161.676	132.641	190.71	1.43778	0.523846	7.31331	0.405546	1	0.39196
																											ENSOCUG00000001751	178.993	157.024	200.963	1.27982	0.355943	7.47281	0.562807	1	0.249641
																											ENSOCUG00000001752	565.177	591.035	539.319	0.912499	-0.132105	9.14105	0.787743	1	0.103615
																											ENSOCUG00000001753	509.472	424.258	594.686	1.40171	0.487187	8.97239	0.321943	1	0.49222
																											ENSOCUG00000001754	440.013	434.011	446.014	1.02766	0.0393599	8.78127	0.942275	1	0.0258224
																											ENSOCUG00000001757	40.3876	24.3826	56.3926	2.31282	1.20965	5.21261	0.258497	1	0.587545
																											ENSOCUG00000001758	187.584	201.888	173.279	0.858293	-0.220458	7.54718	0.719956	1	0.142694
																											ENSOCUG00000001759	354.911	274.061	435.761	1.59002	0.669042	8.43287	0.200082	1	0.698793
																											ENSOCUG00000001761	11.7287	22.432	1.02532	0.0457079	-4.45141	2.26178	0.0814641	1	1.08903
																											ENSOCUG00000001764	96.4927	95.5799	97.4054	1.0191	0.0272955	6.59228	0.986391	1	0.00595098
																											ENSOCUG00000001765	54.317	40.9628	67.6712	1.65201	0.724226	5.71836	0.44061	1	0.355946
																											ENSOCUG00000001767	117.862	121.913	113.811	0.933538	-0.0992186	6.8801	0.897929	1	0.046758
																											ENSOCUG00000001768	336.568	329.653	343.482	1.04195	0.0592876	8.39445	0.915978	1	0.0381148
																											ENSOCUG00000001772	967.115	730.503	1203.73	1.6478	0.720545	9.87302	0.115782	1	0.936358
																											ENSOCUG00000001776	295.205	263.332	327.077	1.24207	0.312747	8.19711	0.565157	1	0.247831
																											ENSOCUG00000001777	82.8009	89.728	75.8737	0.845596	-0.241959	6.36651	0.769081	1	0.114028
																											ENSOCUG00000001779	388.196	375.492	400.9	1.06767	0.0944599	8.59987	0.858354	1	0.0663335
																											ENSOCUG00000001781	37.1491	50.7159	23.5824	0.46499	-1.10473	5.112	0.321991	1	0.492156
																											ENSOCUG00000001782	296.055	270.159	321.951	1.19171	0.253028	8.20418	0.642576	1	0.192075
																											ENSOCUG00000001783	208.478	246.752	170.203	0.689774	-0.535804	7.67902	0.361593	1	0.44178
																											ENSOCUG00000001784	27.4211	30.2344	24.6077	0.813896	-0.297084	4.76958	0.840571	1	0.0754256
																											ENSOCUG00000001785	8.90278	12.679	5.1266	0.404339	-1.30636	3.01118	0.613658	1	0.212073
																											ENSOCUG00000001786	162.738	191.16	134.317	0.702643	-0.509137	7.32407	0.418322	1	0.378489
																											ENSOCUG00000001787	1791.42	1612.18	1970.67	1.22236	0.289671	10.7996	0.508847	1	0.293413
																											ENSOCUG00000001788	272.285	257.48	287.09	1.115	0.157039	8.08684	0.780171	1	0.10781
																											ENSOCUG00000001789	90.3782	114.111	66.6458	0.584046	-0.775847	6.44637	0.309069	1	0.509945
																											ENSOCUG00000001790	1013.69	973.354	1054.03	1.08288	0.114878	9.98426	0.802246	1	0.0956922
																											ENSOCUG00000001792	18.8809	23.4073	14.3545	0.613248	-0.705458	4.19616	0.668616	1	0.174823
																											ENSOCUG00000001798	206.865	209.691	204.039	0.973047	-0.0394184	7.69241	0.955299	1	0.0198606
																											ENSOCUG00000001799	1165.36	1376.16	954.573	0.693652	-0.527715	10.1626	0.241555	1	0.616983
																											ENSOCUG00000001801	8.41513	11.7037	5.1266	0.438034	-1.19088	2.95345	0.661871	1	0.179227
																											ENSOCUG00000001802	1150.67	1209.38	1091.97	0.902916	-0.147337	10.1664	0.744769	1	0.127978
																											ENSOCUG00000001803	13.4667	14.6296	12.3038	0.841026	-0.249778	3.74593	0.93458	1	0.0293836
																											ENSOCUG00000001804	43.7262	34.1357	53.3167	1.5619	0.643306	5.41486	0.537169	1	0.269889
																											ENSOCUG00000001806	26.4958	26.3332	26.6583	1.01235	0.017702	4.72766	1	1	0
																											ENSOCUG00000001807	160.575	175.555	145.596	0.829345	-0.269956	7.3208	0.673266	1	0.171813
																											ENSOCUG00000001808	272.398	353.06	191.735	0.543066	-0.880802	8.02337	0.110555	1	0.956421
																											ENSOCUG00000001810	633.26	754.886	511.635	0.677765	-0.561144	9.27954	0.24043	1	0.619011
																											ENSOCUG00000001812	15.955	17.5555	14.3545	0.817664	-0.29042	3.98864	0.899856	1	0.0458268
																											ENSOCUG00000001814	104.308	130.691	77.9244	0.59625	-0.746012	6.65701	0.30299	1	0.518571
																											ENSOCUG00000001816	93.0416	110.209	75.8737	0.68845	-0.538576	6.51482	0.477501	1	0.321025
																											ENSOCUG00000001817	90.2407	99.4811	81.0003	0.814228	-0.296495	6.4881	0.705444	1	0.151537
																											ENSOCUG00000001818	56.5552	53.6418	59.4686	1.10862	0.148771	5.81967	0.889024	1	0.0510867
																											ENSOCUG00000001819	37.8368	43.8887	31.7849	0.724217	-0.465507	5.22302	0.684372	1	0.164707
																											ENSOCUG00000001820	868.121	732.454	1003.79	1.37045	0.454646	9.74392	0.324792	1	0.488394
																											ENSOCUG00000001821	55.6799	47.7899	63.5699	1.33019	0.411636	5.78445	0.665099	1	0.177113
																											ENSOCUG00000001823	69.6093	64.3701	74.8484	1.16278	0.21758	6.11711	0.809109	1	0.0919927
																											ENSOCUG00000001824	1.97562	2.92591	1.02532	0.350427	-1.51281	0.792481	0.911891	1	0.0400571
																											ENSOCUG00000001825	49.728	39.9875	59.4686	1.48718	0.572579	5.60777	0.561221	1	0.250866
																											ENSOCUG00000001826	7.46483	8.77774	6.15192	0.700855	-0.512813	2.87744	0.895921	1	0.0477304
																											ENSOCUG00000001827	342.657	312.098	373.217	1.19583	0.258016	8.41486	0.625496	1	0.203775
																											ENSOCUG00000001828	850.216	830.96	869.472	1.04635	0.0653606	9.73132	0.889908	1	0.050655
																											ENSOCUG00000001829	1382.13	1439.55	1324.71	0.920228	-0.119937	10.4314	0.788518	1	0.103188
																											ENSOCUG00000001830	33.8106	40.9628	26.6583	0.650794	-0.619728	5.04638	0.602751	1	0.219862
																											ENSOCUG00000001832	801.463	792.923	810.003	1.02154	0.0307471	9.64641	0.950095	1	0.0222329
																											ENSOCUG00000001833	5.53923	3.90122	7.17724	1.83974	0.879505	2.40368	0.834739	1	0.0784493
																											ENSOCUG00000001834	70.322	56.5677	84.0763	1.4863	0.571721	6.10777	0.498855	1	0.302025
																											ENSOCUG00000001836	74.2232	64.3701	84.0763	1.30614	0.385308	6.20097	0.646051	1	0.189733
																											ENSOCUG00000001837	589.234	612.491	565.977	0.924057	-0.113947	9.20157	0.815796	1	0.0884186
																											ENSOCUG00000001838	242.288	247.727	236.849	0.956087	-0.0647859	7.92022	0.915981	1	0.0381136
																											ENSOCUG00000001839	134.054	150.197	117.912	0.785048	-0.349147	7.05614	0.604078	1	0.218907
																											ENSOCUG00000001842	478.5	572.504	384.495	0.671603	-0.57432	8.87398	0.247487	1	0.606447
																											ENSOCUG00000001843	73.0478	70.2219	75.8737	1.08048	0.111678	6.18969	0.908485	1	0.0416823
																											ENSOCUG00000001844	909.184	890.453	927.915	1.04207	0.0594527	9.82812	0.899271	1	0.0461094
																											ENSOCUG00000001847	2322.15	2127.14	2517.16	1.18336	0.242883	11.1761	0.575148	1	0.24022
																											ENSOCUG00000001851	435.436	372.566	498.306	1.33749	0.419533	8.75112	0.405231	1	0.392297
																											ENSOCUG00000001853	30.0719	46.8146	13.3292	0.284722	-1.81237	4.6427	0.148278	1	0.828922
																											ENSOCUG00000001855	16.4426	18.5308	14.3545	0.774629	-0.368423	4.02764	0.857778	1	0.0666251
																											ENSOCUG00000001856	63.895	67.296	60.4939	0.898922	-0.153732	5.99558	0.87629	1	0.057352
																											ENSOCUG00000001857	27.0835	23.4073	30.7596	1.3141	0.394078	4.74593	0.780336	1	0.107718
																											ENSOCUG00000001859	112.398	115.086	109.709	0.953281	-0.0690263	6.81206	0.934951	1	0.0292112
																											ENSOCUG00000001861	159.437	159.95	158.925	0.99359	-0.00927781	7.31684	0.999725	1	0.000119401
																											ENSOCUG00000001863	15.1047	10.7284	19.4811	1.81585	0.860646	3.85368	0.643325	1	0.19157
																											ENSOCUG00000001867	17.718	8.77774	26.6583	3.03704	1.60266	3.93518	0.331015	1	0.480152
																											ENSOCUG00000001868	236.236	243.826	228.646	0.937744	-0.0927346	7.88334	0.877253	1	0.0568753
																											ENSOCUG00000001870	144.908	86.8021	203.013	2.33881	1.22577	7.05255	0.0607047	1	1.21678
																											ENSOCUG00000001873	252.591	245.777	259.406	1.05545	0.0778634	7.98014	0.896076	1	0.0476551
																											ENSOCUG00000001874	25.5205	24.3826	26.6583	1.09333	0.128733	4.67215	0.954047	1	0.0204303
																											ENSOCUG00000001875	48.9153	51.6912	46.1394	0.892598	-0.163918	5.60989	0.886099	1	0.0525178
																											ENSOCUG00000001877	915.761	793.898	1037.62	1.307	0.386258	9.82594	0.400507	1	0.39739
																											ENSOCUG00000001879	356.336	338.431	374.242	1.10582	0.145111	8.47527	0.784602	1	0.105351
																											ENSOCUG00000001880	212.616	185.308	239.925	1.29474	0.372659	7.72011	0.525069	1	0.279784
																											ENSOCUG00000001881	73.4355	75.0985	71.7724	0.955711	-0.0653537	6.19803	0.954378	1	0.0202795
																											ENSOCUG00000001882	30.522	29.2591	31.7849	1.08632	0.119456	4.93054	0.950049	1	0.0222539
																											ENSOCUG00000001883	31.3973	35.111	27.6837	0.788462	-0.342888	4.96241	0.794796	1	0.0997443
																											ENSOCUG00000001884	266.658	276.987	256.33	0.925424	-0.111813	8.05777	0.845524	1	0.0728743
																											ENSOCUG00000001885	375.842	337.455	414.229	1.22751	0.295733	8.54642	0.568389	1	0.245354
																											ENSOCUG00000001886	744.695	727.577	761.813	1.04705	0.0663364	9.54013	0.890076	1	0.0505732
																											ENSOCUG00000001887	194.161	225.295	163.026	0.72361	-0.466716	7.58232	0.435956	1	0.360557
																											ENSOCUG00000001888	380.794	424.258	337.33	0.795108	-0.330778	8.56341	0.522076	1	0.282266
																											ENSOCUG00000001889	2662.84	2695.74	2629.95	0.975593	-0.035649	11.3786	0.93491	1	0.0292301
																											ENSOCUG00000001890	905.258	883.626	926.89	1.04896	0.0689615	9.82177	0.882888	1	0.0540945
																											ENSOCUG00000001891	1.00031	0.975305	1.02532	1.05128	0.0721498	1.28137e-15	1	1	0
																											ENSOCUG00000001892	259.581	233.098	286.064	1.22723	0.295404	8.01249	0.597971	1	0.22332
																											ENSOCUG00000001894	231.51	228.221	234.798	1.02882	0.0409889	7.85478	0.950797	1	0.021912
																											ENSOCUG00000001897	477.899	435.961	519.837	1.19239	0.253861	8.89499	0.610544	1	0.214283
																											ENSOCUG00000001902	108.046	124.839	91.2535	0.73097	-0.452117	6.73787	0.53035	1	0.275437
																											ENSOCUG00000001903	4.4889	4.87652	4.10128	0.841026	-0.249778	2.16096	1	1	0
																											ENSOCUG00000001906	19.056	16.5802	21.5317	1.29864	0.377004	4.23989	0.835358	1	0.0781275
																											ENSOCUG00000001907	330.028	284.789	375.267	1.3177	0.398025	8.35276	0.452661	1	0.344227
																											ENSOCUG00000001908	251.716	239.925	263.507	1.09829	0.13526	7.97407	0.814771	1	0.0889646
																											ENSOCUG00000001909	9.61551	4.87652	14.3545	2.94359	1.55758	3.06464	0.519363	1	0.284529
																											ENSOCUG00000001910	24.7452	14.6296	34.8609	2.38291	1.25272	4.49718	0.359889	1	0.443831
																											ENSOCUG00000001911	498.993	513.01	484.977	0.945354	-0.0810728	8.96231	0.873037	1	0.0589672
																											ENSOCUG00000001912	1466.47	1609.25	1323.69	0.822549	-0.281827	10.5113	0.525146	1	0.27972
																											ENSOCUG00000001913	33.4229	36.0863	30.7596	0.852391	-0.230413	5.05817	0.865832	1	0.0625665
																											ENSOCUG00000001914	462.244	446.69	477.799	1.06965	0.0971321	8.85169	0.849259	1	0.0709597
																											ENSOCUG00000001915	1029.08	992.86	1065.31	1.07297	0.101608	10.0063	0.824728	1	0.0836893
																											ENSOCUG00000001918	31.96	33.1604	30.7596	0.927602	-0.108422	4.99718	0.955379	1	0.0198245
																											ENSOCUG00000001919	518.35	397.924	638.775	1.60527	0.682813	8.97776	0.164394	1	0.784115
																											ENSOCUG00000001920	112.01	150.197	73.8231	0.491508	-1.02471	6.71836	0.147607	1	0.830892
																											ENSOCUG00000001921	27.321	34.1357	20.5064	0.600733	-0.735205	4.72561	0.578124	1	0.237979
																											ENSOCUG00000001923	30.5846	46.8146	14.3545	0.306624	-1.70546	4.69616	0.16864	1	0.773039
																											ENSOCUG00000001924	73.0478	70.2219	75.8737	1.08048	0.111678	6.18969	0.908485	1	0.0416823
																											ENSOCUG00000001925	69.8468	75.0985	64.5952	0.86014	-0.217357	6.12203	0.809144	1	0.0919743
																											ENSOCUG00000001931	102.032	139.469	64.5952	0.463152	-1.11044	6.56858	0.129118	1	0.889013
																											ENSOCUG00000001933	42.7134	53.6418	31.7849	0.592541	-0.755014	5.36778	0.471911	1	0.32614
																											ENSOCUG00000001937	497.455	473.023	521.888	1.1033	0.141831	8.95668	0.776532	1	0.109841
																											ENSOCUG00000001938	2006.09	2237.35	1774.83	0.793273	-0.33411	10.9605	0.443544	1	0.353063
																											ENSOCUG00000001940	107.008	105.333	108.684	1.03181	0.0451827	6.7414	0.963831	1	0.0159992
																											ENSOCUG00000001941	12.954	14.6296	11.2785	0.77094	-0.375309	3.68316	0.881926	1	0.054568
																											ENSOCUG00000001943	233.273	219.444	247.102	1.12604	0.171258	7.86334	0.769165	1	0.113981
																											ENSOCUG00000001946	3.02595	1.95061	4.10128	2.10256	1.07215	1.5	0.897402	1	0.0470132
																											ENSOCUG00000001949	188.721	217.493	159.95	0.735426	-0.443348	7.54315	0.463013	1	0.334407
																											ENSOCUG00000001950	1.51297	0.975305	2.05064	2.10256	1.07215	0.5	0.991961	1	0.00350522
																											ENSOCUG00000001951	41.4755	41.9381	41.0128	0.977937	-0.0321869	5.3741	1	1	0
																											ENSOCUG00000001952	40.7127	51.6912	29.7343	0.57523	-0.79779	5.29295	0.456904	1	0.340175
																											ENSOCUG00000001953	73.1604	85.8268	60.4939	0.704837	-0.504639	6.17104	0.545816	1	0.262954
																											ENSOCUG00000001956	87.2523	76.0738	98.4308	1.29389	0.37171	6.43518	0.636292	1	0.196344
																											ENSOCUG00000001957	246.202	235.048	257.355	1.0949	0.130804	7.94222	0.822069	1	0.0850915
																											ENSOCUG00000001961	19.4186	22.432	16.4051	0.731327	-0.451412	4.26178	0.793534	1	0.100435
																											ENSOCUG00000001962	21.9319	24.3826	19.4811	0.798974	-0.323779	4.44589	0.848845	1	0.0711715
																											ENSOCUG00000001963	1047.73	1005.54	1089.92	1.08391	0.116247	10.0319	0.799319	1	0.0972797
																											ENSOCUG00000001964	191.86	235.048	148.671	0.632514	-0.66083	7.5464	0.270562	1	0.567733
																											ENSOCUG00000001966	77.9994	77.0491	78.9497	1.02467	0.0351556	6.28528	0.982966	1	0.00746135
																											ENSOCUG00000001968	196.599	150.197	243.001	1.61788	0.694106	7.57776	0.243886	1	0.612814
																											ENSOCUG00000001969	1.97562	2.92591	1.02532	0.350427	-1.51281	0.792481	0.911891	1	0.0400571
																											ENSOCUG00000001970	3.43857	5.85183	1.02532	0.175214	-2.51281	1.29248	0.660663	1	0.18002
																											ENSOCUG00000001971	118.387	141.419	95.3548	0.674271	-0.5686	6.85953	0.413212	1	0.383827
																											ENSOCUG00000001972	385.433	423.282	347.584	0.821163	-0.28426	8.58335	0.581988	1	0.235086
																											ENSOCUG00000001973	6.3895	10.7284	2.05064	0.191142	-2.38728	2.22972	0.470449	1	0.327487
																											ENSOCUG00000001975	46.6521	39.9875	53.3167	1.33333	0.415037	5.529	0.688643	1	0.162006
																											ENSOCUG00000001979	108.271	116.061	100.481	0.865762	-0.207958	6.75476	0.780112	1	0.107843
																											ENSOCUG00000001981	113.973	133.617	94.3295	0.70597	-0.50232	6.8108	0.476421	1	0.322009
																											ENSOCUG00000001982	961.601	1085.51	837.687	0.771696	-0.373896	9.89722	0.413768	1	0.383243
																											ENSOCUG00000001984	163.076	197.987	128.165	0.647341	-0.627402	7.31556	0.317529	1	0.498216
																											ENSOCUG00000001985	41.6255	36.0863	47.1647	1.307	0.386258	5.36651	0.72673	1	0.138627
																											ENSOCUG00000001986	12.0038	11.7037	12.3038	1.05128	0.0721498	3.58496	1	1	0
																											ENSOCUG00000001987	22.1194	37.0616	7.17724	0.193657	-2.36842	4.02764	0.115343	1	0.93801
																											ENSOCUG00000001990	180.994	198.962	163.026	0.819382	-0.287393	7.49265	0.641028	1	0.193123
																											ENSOCUG00000001993	10.9784	11.7037	10.2532	0.876068	-0.190885	3.45345	0.975653	1	0.0107048
																											ENSOCUG00000001994	25.9331	28.2838	23.5824	0.833775	-0.262269	4.69077	0.868428	1	0.0612663
																											ENSOCUG00000001996	265.483	242.851	288.115	1.18639	0.246574	8.04721	0.659235	1	0.18096
																											ENSOCUG00000001998	349.059	342.332	355.786	1.0393	0.0556144	8.44706	0.920815	1	0.0358274
																											ENSOCUG00000001999	365.527	439.862	291.191	0.662005	-0.595087	8.48337	0.251856	1	0.598847
																											ENSOCUG00000002000	98.6058	113.135	84.0763	0.743148	-0.428279	6.60777	0.566028	1	0.247162
																											ENSOCUG00000002001	671.422	586.158	756.687	1.29093	0.368406	9.37935	0.437643	1	0.35888
																											ENSOCUG00000002003	229.072	263.332	194.811	0.739791	-0.43481	7.82334	0.449112	1	0.347645
																											ENSOCUG00000002004	939.031	866.071	1011.99	1.16849	0.22464	9.87066	0.624726	1	0.204311
																											ENSOCUG00000002006	757.537	766.59	748.484	0.976382	-0.0344831	9.56507	0.944167	1	0.024951
																											ENSOCUG00000002007	281.988	238.95	325.027	1.36023	0.443851	8.12249	0.417252	1	0.379601
																											ENSOCUG00000002008	258.268	224.32	292.216	1.30268	0.381478	8.00015	0.494834	1	0.30554
																											ENSOCUG00000002009	109.972	89.728	130.216	1.45123	0.537273	6.75612	0.45113	1	0.345698
																											ENSOCUG00000002011	10.9034	14.6296	7.17724	0.490598	-1.02739	3.35712	0.653073	1	0.185038
																											ENSOCUG00000002013	350.547	344.283	356.812	1.03639	0.0515689	8.45323	0.926937	1	0.0329498
																											ENSOCUG00000002014	434.611	444.739	424.483	0.954453	-0.0672533	8.76319	0.898118	1	0.0466665
																											ENSOCUG00000002017	558.837	538.368	579.306	1.07604	0.105732	9.12532	0.830468	1	0.080677
																											ENSOCUG00000002018	290.791	295.517	286.064	0.968012	-0.0469029	8.18365	0.937674	1	0.027948
																											ENSOCUG00000002020	34.3482	39.9875	28.709	0.717949	-0.478047	5.08245	0.691287	1	0.160342
																											ENSOCUG00000002021	205.914	206.765	205.064	0.991776	-0.0119145	7.68589	0.993256	1	0.002939
																											ENSOCUG00000002022	587.859	586.158	589.559	1.0058	0.00834675	9.19932	0.990178	1	0.00428692
																											ENSOCUG00000002023	307.871	269.184	346.558	1.28744	0.364505	8.2547	0.498026	1	0.302748
																											ENSOCUG00000002024	2.95092	4.87652	1.02532	0.210256	-2.24978	1.16096	0.738089	1	0.131891
																											ENSOCUG00000002025	358.224	364.764	351.685	0.964144	-0.0526799	8.48448	0.924824	1	0.0339411
																											ENSOCUG00000002026	27.6461	21.4567	33.8356	1.57692	0.657112	4.75191	0.618869	1	0.208401
																											ENSOCUG00000002027	631.872	589.084	674.661	1.14527	0.195689	9.30017	0.683679	1	0.165148
																											ENSOCUG00000002028	2.00063	1.95061	2.05064	1.05128	0.0721498	1	1	1	0
																											ENSOCUG00000002030	12.5664	9.75305	15.3798	1.57692	0.657112	3.61441	0.764786	1	0.11646
																											ENSOCUG00000002031	308.822	272.11	345.533	1.26983	0.344633	8.26036	0.521721	1	0.282562
																											ENSOCUG00000002033	49.478	49.7405	49.2154	0.989442	-0.0153131	5.62869	1	1	0
																											ENSOCUG00000002037	393.31	475.949	310.672	0.652743	-0.615414	8.58696	0.229988	1	0.638296
																											ENSOCUG00000002041	2033.49	1988.65	2078.32	1.0451	0.0636341	10.9894	0.884811	1	0.0531494
																											ENSOCUG00000002042	9.02782	7.80244	10.2532	1.3141	0.394078	3.16096	0.913862	1	0.0391193
																											ENSOCUG00000002043	253.654	264.308	243.001	0.919387	-0.121256	7.98545	0.834182	1	0.0787389
																											ENSOCUG00000002047	10.1032	5.85183	14.3545	2.45299	1.29454	3.19616	0.582556	1	0.234662
																											ENSOCUG00000002050	30.1344	24.3826	35.8862	1.47179	0.557577	4.88657	0.661951	1	0.179174
																											ENSOCUG00000002051	10.3657	15.6049	5.1266	0.328526	-1.60592	3.16096	0.486099	1	0.313275
																											ENSOCUG00000002052	977.18	1117.7	836.661	0.748557	-0.417816	9.91741	0.360396	1	0.44322
																											ENSOCUG00000002053	468.534	501.307	435.761	0.869251	-0.202156	8.86847	0.68689	1	0.163113
																											ENSOCUG00000002054	49.7656	58.5183	41.0128	0.700855	-0.512813	5.61441	0.604942	1	0.218286
																											ENSOCUG00000002055	144.708	174.58	114.836	0.657785	-0.604311	7.14559	0.353056	1	0.452156
																											ENSOCUG00000002059	339.594	291.616	387.571	1.32905	0.410391	8.39312	0.436083	1	0.360431
																											ENSOCUG00000002060	28.1963	39.9875	16.4051	0.410256	-1.2854	4.67878	0.315503	1	0.500997
																											ENSOCUG00000002063	1370.45	1455.15	1285.75	0.883584	-0.17856	10.4177	0.689015	1	0.161772
																											ENSOCUG00000002064	1.00031	0.975305	1.02532	1.05128	0.0721498	1.28137e-15	1	1	0
																											ENSOCUG00000002065	393.998	469.122	318.875	0.679727	-0.556973	8.59533	0.277082	1	0.557392
																											ENSOCUG00000002066	97.8431	82.9009	112.785	1.36048	0.444119	6.59538	0.552244	1	0.257869
																											ENSOCUG00000002071	1101.52	947.021	1256.02	1.32628	0.407388	10.0909	0.367735	1	0.434465
																											ENSOCUG00000002072	347.096	358.912	335.28	0.934156	-0.0982653	8.43835	0.855986	1	0.0675335
																											ENSOCUG00000002073	1425.35	1313.74	1536.96	1.16991	0.2264	10.4727	0.610554	1	0.214276
																											ENSOCUG00000002074	9835.3	8700.69	10969.9	1.26081	0.334348	13.2541	0.425698	1	0.370898
																											ENSOCUG00000002075	977.28	1033.82	920.738	0.890614	-0.167127	9.93021	0.715498	1	0.145392
																											ENSOCUG00000002076	567.202	432.06	702.345	1.62557	0.700947	9.10556	0.148517	1	0.828223
																											ENSOCUG00000002080	113.836	118.987	108.684	0.913409	-0.130667	6.82933	0.86337	1	0.0638031
																											ENSOCUG00000002083	26.3332	12.679	39.9875	3.15385	1.65711	4.49292	0.213215	1	0.671183
																											ENSOCUG00000002084	103.857	108.259	99.4561	0.918688	-0.122353	6.69716	0.877999	1	0.0565058
																											ENSOCUG00000002085	80.2251	70.2219	90.2282	1.2849	0.361656	6.31468	0.657016	1	0.182424
																											ENSOCUG00000002089	4.92654	7.80244	2.05064	0.262821	-1.92785	2	0.635411	1	0.196945
																											ENSOCUG00000002090	115.424	117.037	113.811	0.972436	-0.0403249	6.85065	0.967494	1	0.0143516
																											ENSOCUG00000002093	221.369	203.839	238.9	1.172	0.228977	7.78577	0.696104	1	0.157326
																											ENSOCUG00000002094	425.22	391.097	459.344	1.1745	0.232046	8.72741	0.648266	1	0.188247
																											ENSOCUG00000002095	81.438	82.9009	79.975	0.964706	-0.0518389	6.3474	0.964616	1	0.0156454
																											ENSOCUG00000002098	588.959	583.232	594.686	1.01964	0.0280572	9.20196	0.957323	1	0.0189413
																											ENSOCUG00000002099	605.339	624.195	586.483	0.939583	-0.089907	9.2409	0.854419	1	0.068329
																											ENSOCUG00000002100	521.088	471.072	571.103	1.21235	0.277804	9.01871	0.571956	1	0.242637
																											ENSOCUG00000002102	68.6214	42.9134	94.3295	2.19814	1.13628	5.9915	0.180767	1	0.742882
																											ENSOCUG00000002105	160.175	151.172	169.178	1.11911	0.162348	7.32122	0.804264	1	0.0946012
																											ENSOCUG00000002106	175.042	151.172	198.912	1.3158	0.395938	7.43802	0.521615	1	0.28265
																											ENSOCUG00000002107	1327.19	1303.01	1351.37	1.03712	0.0525801	10.3739	0.907731	1	0.0420427
																											ENSOCUG00000002108	68.2963	55.5924	81.0003	1.45704	0.543041	6.06834	0.526374	1	0.278706
																											ENSOCUG00000002109	44.3264	50.7159	37.9369	0.748028	-0.418837	5.45495	0.693662	1	0.158852
																											ENSOCUG00000002110	656.68	661.257	652.104	0.986158	-0.0201087	9.35901	0.96976	1	0.013336
																											ENSOCUG00000002112	15.2298	5.85183	24.6077	4.20513	2.07215	3.58496	0.255226	1	0.593076
																											ENSOCUG00000002114	16.3426	22.432	10.2532	0.457079	-1.12948	3.92275	0.516335	1	0.287068
																											ENSOCUG00000002115	236.511	193.11	279.912	1.44949	0.53555	7.86106	0.346547	1	0.460238
																											ENSOCUG00000002117	69.7843	97.5305	42.0381	0.431026	-1.21415	6.0007	0.150936	1	0.821207
																											ENSOCUG00000002118	129.653	121.913	137.393	1.12697	0.172455	7.01594	0.806344	1	0.0934795
																											ENSOCUG00000002119	12.9791	13.6543	12.3038	0.901099	-0.150243	3.69616	0.982479	1	0.00767652
																											ENSOCUG00000002120	557.699	522.763	592.635	1.13366	0.180986	9.12051	0.711308	1	0.147943
																											ENSOCUG00000002121	1295.94	1262.04	1329.84	1.05372	0.0754906	10.3393	0.867255	1	0.0618532
																											ENSOCUG00000002122	482.701	408.653	556.749	1.3624	0.446152	8.89781	0.368266	1	0.433838
																											ENSOCUG00000002126	239.412	239.925	238.9	0.995726	-0.00617857	7.90335	0.999797	1	8.82499e-05
																											ENSOCUG00000002127	35.9862	36.0863	35.8862	0.994456	-0.00802056	5.16937	1	1	0
																											ENSOCUG00000002128	2056.07	2147.62	1964.51	0.91474	-0.128567	11.0042	0.768394	1	0.114416
																											ENSOCUG00000002129	359.85	341.357	378.343	1.10835	0.148416	8.48934	0.779255	1	0.10832
																											ENSOCUG00000002131	371.391	391.097	351.685	0.899226	-0.153244	8.53476	0.770705	1	0.113112
																											ENSOCUG00000002134	998.4	949.947	1046.85	1.10201	0.140139	9.96177	0.759791	1	0.119306
																											ENSOCUG00000002135	604.176	609.566	598.787	0.982318	-0.025738	9.23877	0.960969	1	0.0172907
																											ENSOCUG00000002137	40.4251	42.9134	37.9369	0.884033	-0.177828	5.33444	0.888957	1	0.0511191
																											ENSOCUG00000002139	278.362	300.394	256.33	0.853313	-0.228852	8.11629	0.67956	1	0.167772
																											ENSOCUG00000002140	5.53923	3.90122	7.17724	1.83974	0.879505	2.40368	0.834739	1	0.0784493
																											ENSOCUG00000002142	6.46452	7.80244	5.1266	0.657051	-0.605922	2.66096	0.886295	1	0.0524215
																											ENSOCUG00000002143	27.1585	20.4814	33.8356	1.65201	0.724226	4.71836	0.584763	1	0.23302
																											ENSOCUG00000002144	47.6774	39.9875	55.3673	1.38462	0.469485	5.55622	0.644043	1	0.191085
																											ENSOCUG00000002145	86.7771	94.6046	78.9497	0.834523	-0.260977	6.43335	0.745299	1	0.12767
																											ENSOCUG00000002147	472.96	568.603	377.318	0.663588	-0.59164	8.85546	0.234373	1	0.630092
																											ENSOCUG00000002148	381.207	428.159	334.254	0.780679	-0.357199	8.5634	0.489026	1	0.310668
																											ENSOCUG00000002149	182.007	179.456	184.558	1.02843	0.0404409	7.50771	0.956608	1	0.019266
																											ENSOCUG00000002150	13787	12894.5	14679.5	1.13843	0.187048	13.748	0.654757	1	0.18392
																											ENSOCUG00000002151	251.729	179.456	324.001	1.80546	0.852369	7.91367	0.128851	1	0.889912
																											ENSOCUG00000002152	24.3951	28.2838	20.5064	0.725022	-0.463903	4.58995	0.753335	1	0.123012
																											ENSOCUG00000002153	133.129	146.296	119.962	0.82	-0.286304	7.04959	0.673403	1	0.171725
																											ENSOCUG00000002154	98.7434	127.765	69.7218	0.545704	-0.87381	6.56044	0.236665	1	0.625866
																											ENSOCUG00000002155	2565.73	2784.5	2346.96	0.842867	-0.246623	11.3199	0.567771	1	0.245827
																											ENSOCUG00000002156	145.158	157.024	133.292	0.848861	-0.236399	7.17664	0.722116	1	0.141393
																											ENSOCUG00000002157	1164.68	1263.02	1066.33	0.844273	-0.244219	10.1806	0.588007	1	0.230618
																											ENSOCUG00000002158	286.665	336.48	236.849	0.703902	-0.506554	8.1411	0.352642	1	0.452666
																											ENSOCUG00000002159	50.8659	55.5924	46.1394	0.82996	-0.268887	5.66237	0.794623	1	0.0998386
																											ENSOCUG00000002160	91.1285	84.8515	97.4054	1.14795	0.199062	6.5064	0.804084	1	0.0946987
																											ENSOCUG00000002161	3.00094	2.92591	3.07596	1.05128	0.0721498	1.58496	1	1	0
																											ENSOCUG00000002163	422.132	451.566	392.698	0.869635	-0.201518	8.71803	0.693017	1	0.159256
																											ENSOCUG00000002165	824.995	714.898	935.092	1.30801	0.38737	9.67528	0.403859	1	0.393771
																											ENSOCUG00000002166	377.781	361.838	393.723	1.08812	0.121837	8.56012	0.817291	1	0.0876232
																											ENSOCUG00000002167	28.0338	26.3332	29.7343	1.12915	0.175243	4.80643	0.917793	1	0.0372551
																											ENSOCUG00000002171	51.066	47.7899	54.342	1.1371	0.18536	5.67132	0.864553	1	0.0632082
																											ENSOCUG00000002172	268.446	307.221	229.672	0.747578	-0.419703	8.05328	0.448329	1	0.348403
																											ENSOCUG00000002173	13.1041	8.77774	17.4304	1.98575	0.989688	3.62869	0.623205	1	0.205369
																											ENSOCUG00000002176	825.746	805.602	845.889	1.05001	0.0704021	9.68912	0.881662	1	0.0546976
																											ENSOCUG00000002177	77.9244	39.9875	115.861	2.89744	1.53478	6.08887	0.0596125	1	1.22466
																											ENSOCUG00000002178	110.147	122.888	97.4054	0.792633	-0.335275	6.77357	0.642466	1	0.19215
																											ENSOCUG00000002179	315.161	324.777	305.545	0.940787	-0.0880601	8.29927	0.874356	1	0.0583115
																											ENSOCUG00000002180	1000.44	930.441	1070.43	1.15046	0.20221	9.96288	0.658075	1	0.181725
																											ENSOCUG00000002181	528.328	528.615	528.04	0.998912	-0.00157063	9.04529	1	1	0
																											ENSOCUG00000002182	123.476	122.888	124.064	1.00956	0.0137331	6.94807	0.997552	1	0.00106461
																											ENSOCUG00000002183	320.013	295.517	344.508	1.16578	0.221293	8.31775	0.68056	1	0.167133
																											ENSOCUG00000002186	18.6433	12.679	24.6077	1.94083	0.956673	4.1427	0.554118	1	0.256398
																											ENSOCUG00000002188	1761.43	2082.28	1440.58	0.691827	-0.531516	10.7582	0.226229	1	0.645451
																											ENSOCUG00000002190	50.8159	57.543	44.0888	0.766189	-0.384229	5.65445	0.700624	1	0.154515
																											ENSOCUG00000002192	5.95186	7.80244	4.10128	0.525641	-0.92785	2.5	0.810331	1	0.0913375
																											ENSOCUG00000002193	574.054	604.689	543.42	0.898677	-0.154126	9.16299	0.752235	1	0.123647
																											ENSOCUG00000002194	557.149	504.233	610.066	1.20989	0.274875	9.11538	0.572392	1	0.242307
																											ENSOCUG00000002197	37.2241	47.7899	26.6583	0.557823	-0.84212	5.15757	0.451594	1	0.345252
																											ENSOCUG00000002198	15.0297	13.6543	16.4051	1.20147	0.264795	3.90368	0.91772	1	0.0372896
																											ENSOCUG00000002200	280.563	254.555	306.571	1.20434	0.268245	8.12595	0.62649	1	0.203086
																											ENSOCUG00000002202	1061.76	1098.19	1025.32	0.933643	-0.099057	10.0514	0.828644	1	0.081632
																											ENSOCUG00000002205	603.139	550.072	656.205	1.19294	0.254527	9.23074	0.597457	1	0.223693
																											ENSOCUG00000002206	34.2107	25.3579	43.0635	1.69822	0.764027	5.04638	0.513487	1	0.289471
																											ENSOCUG00000002207	98.9309	100.456	97.4054	0.969629	-0.0444951	6.62818	0.96679	1	0.0146677
																											ENSOCUG00000002208	5.02657	3.90122	6.15192	1.57692	0.657112	2.29248	0.905977	1	0.0428828
																											ENSOCUG00000002210	74.0982	69.2466	78.9497	1.14012	0.189189	6.20827	0.831119	1	0.080337
																											ENSOCUG00000002211	264.208	292.591	235.824	0.805983	-0.311179	8.03715	0.576773	1	0.238995
																											ENSOCUG00000002212	248.015	224.32	271.71	1.21126	0.276508	7.94767	0.625799	1	0.203565
																											ENSOCUG00000002214	1296.37	1245.46	1347.27	1.08174	0.113357	10.3391	0.800865	1	0.0964406
																											ENSOCUG00000002215	14.467	15.6049	13.3292	0.854167	-0.22741	3.85022	0.939143	1	0.0272681
																											ENSOCUG00000002216	40.125	54.6171	25.633	0.469322	-1.09135	5.22561	0.310045	1	0.508575
																											ENSOCUG00000002217	138.793	145.32	132.266	0.91017	-0.135791	7.1152	0.845827	1	0.0727184
																											ENSOCUG00000002218	185.22	154.098	216.343	1.40393	0.489468	7.51244	0.419487	1	0.377282
																											ENSOCUG00000002219	190.51	167.752	213.267	1.27132	0.346325	7.56335	0.566824	1	0.246552
																											ENSOCUG00000002220	291.916	291.616	292.216	1.00206	0.00296622	8.18941	1	1	0
																											ENSOCUG00000002223	228.084	241.876	214.292	0.885959	-0.174687	7.83078	0.765943	1	0.115804
																											ENSOCUG00000002224	73.6105	68.2713	78.9497	1.15641	0.209653	6.19803	0.811725	1	0.090591
																											ENSOCUG00000002225	271.635	322.826	220.444	0.682857	-0.550345	8.05944	0.318112	1	0.49742
																											ENSOCUG00000002226	203.576	197.987	209.165	1.05646	0.0792392	7.66888	0.901142	1	0.0452068
																											ENSOCUG00000002230	3781.44	3216.56	4346.33	1.35124	0.434282	11.8684	0.30878	1	0.51035
																											ENSOCUG00000002231	462.632	571.529	353.736	0.618929	-0.692155	8.8126	0.16588	1	0.780205
																											ENSOCUG00000002233	8.44014	10.7284	6.15192	0.573427	-0.802319	3.0222	0.782753	1	0.106375
																											ENSOCUG00000002235	557.274	579.331	535.217	0.923854	-0.114263	9.12111	0.816788	1	0.0878905
																											ENSOCUG00000002236	666.471	659.306	673.636	1.02173	0.0310199	9.38031	0.951208	1	0.0217246
																											ENSOCUG00000002237	3.05095	0.975305	5.1266	5.25641	2.39408	1.16096	0.708261	1	0.149807
																											ENSOCUG00000002238	771.541	740.256	802.826	1.08452	0.117062	9.59041	0.804067	1	0.0947078
																											ENSOCUG00000002240	215.53	211.641	219.419	1.03675	0.0520655	7.75151	0.936867	1	0.0283218
																											ENSOCUG00000002241	830.985	741.232	920.738	1.24217	0.312866	9.69021	0.500096	1	0.300946
																											ENSOCUG00000002242	140.206	150.197	130.216	0.866966	-0.205952	7.12774	0.760965	1	0.118635
																											ENSOCUG00000002243	234.411	315.023	153.798	0.488211	-1.03442	7.7821	0.0707884	1	1.15004
																											ENSOCUG00000002245	85.1391	98.5058	71.7724	0.728611	-0.456779	6.39375	0.562208	1	0.250103
																											ENSOCUG00000002246	260.444	219.444	301.444	1.37368	0.458041	8.00673	0.410716	1	0.386458
																											ENSOCUG00000002248	1114.84	1007.49	1222.18	1.2131	0.278694	10.1159	0.537614	1	0.26953
																											ENSOCUG00000002249	324.564	277.962	371.166	1.33531	0.417178	8.32733	0.432583	1	0.363931
																											ENSOCUG00000002250	64.7327	54.6171	74.8484	1.37042	0.454619	5.99859	0.606743	1	0.216995
																											ENSOCUG00000002251	87.865	112.16	63.5699	0.566778	-0.819144	6.39984	0.287829	1	0.540865
																											ENSOCUG00000002253	278.462	336.48	220.444	0.655147	-0.61011	8.08932	0.26575	1	0.575527
																											ENSOCUG00000002254	678.437	652.479	704.395	1.07957	0.110454	9.40501	0.817977	1	0.0872587
																											ENSOCUG00000002256	10.4658	11.7037	9.22788	0.788462	-0.342888	3.37744	0.918272	1	0.0370286
																											ENSOCUG00000002258	13.3417	19.5061	7.17724	0.367949	-1.44242	3.56464	0.461549	1	0.335782
																											ENSOCUG00000002259	1454.05	1633.64	1274.47	0.780145	-0.358185	10.4948	0.419459	1	0.37731
																											ENSOCUG00000002260	228.947	268.209	189.684	0.707226	-0.499757	7.81733	0.383841	1	0.415848
																											ENSOCUG00000002261	1.97562	2.92591	1.02532	0.350427	-1.51281	0.792481	0.911891	1	0.0400571
																											ENSOCUG00000002263	723.876	679.787	767.965	1.12971	0.175957	9.49692	0.709794	1	0.148867
																											ENSOCUG00000002264	28.5714	25.3579	31.7849	1.25345	0.325906	4.82732	0.817075	1	0.0877381
																											ENSOCUG00000002266	1.51297	0.975305	2.05064	2.10256	1.07215	0.5	0.991961	1	0.00350522
																											ENSOCUG00000002267	183.882	186.283	181.482	0.974225	-0.0376735	7.52252	0.960107	1	0.0176804
																											ENSOCUG00000002269	16.5427	14.6296	18.4558	1.26154	0.335184	4.03841	0.873428	1	0.058773
																											ENSOCUG00000002271	5209.03	5382.71	5035.35	0.935468	-0.0962403	12.346	0.820408	1	0.0859703
																											ENSOCUG00000002272	24.6952	16.5802	32.8103	1.97888	0.984687	4.54373	0.474167	1	0.324069
																											ENSOCUG00000002274	94.417	96.5552	92.2788	0.955711	-0.0653537	6.5606	0.945299	1	0.0244309
																											ENSOCUG00000002278	250.016	266.258	233.773	0.877994	-0.187717	7.96282	0.742573	1	0.129261
																											ENSOCUG00000002279	181.632	154.098	209.165	1.35735	0.440794	7.4881	0.470181	1	0.327735
																											ENSOCUG00000002281	6.53954	4.87652	8.20256	1.68205	0.750222	2.66096	0.841919	1	0.0747295
																											ENSOCUG00000002283	619.769	661.257	578.281	0.874518	-0.19344	9.27235	0.687939	1	0.16245
																											ENSOCUG00000002285	2.51329	1.95061	3.07596	1.57692	0.657112	1.29248	0.98818	1	0.00516405
																											ENSOCUG00000002287	355.349	356.962	353.736	0.990963	-0.0130975	8.47308	0.986043	1	0.00610398
																											ENSOCUG00000002289	2705.17	2544.57	2865.77	1.12623	0.171501	11.399	0.690748	1	0.16068
																											ENSOCUG00000002290	547.096	576.405	517.787	0.898304	-0.154725	9.09358	0.752973	1	0.12322
																											ENSOCUG00000002292	1343.14	1280.58	1405.71	1.09772	0.134511	10.3898	0.763782	1	0.117031
																											ENSOCUG00000002295	11.0284	9.75305	12.3038	1.26154	0.335184	3.45345	0.91576	1	0.0382183
																											ENSOCUG00000002296	382.87	383.295	382.445	0.997782	-0.0032039	8.58071	1	1	0
																											ENSOCUG00000002298	331.879	372.566	291.191	0.781581	-0.355532	8.36359	0.502374	1	0.298973
																											ENSOCUG00000002299	540.294	561.776	518.812	0.923522	-0.114782	9.07646	0.816816	1	0.0878756
																											ENSOCUG00000002300	307.296	291.616	322.976	1.10754	0.147356	8.2616	0.787999	1	0.103474
																											ENSOCUG00000002301	10.0531	7.80244	12.3038	1.57692	0.657112	3.29248	0.802285	1	0.0956713
																											ENSOCUG00000002302	108.809	115.086	102.532	0.890917	-0.166637	6.76325	0.825556	1	0.0832536
																											ENSOCUG00000002303	123.964	123.864	124.064	1.00162	0.00232834	6.95377	1	1	0
																											ENSOCUG00000002304	1949.67	1958.41	1940.93	0.991074	-0.0129351	10.929	0.977646	1	0.00981848
																											ENSOCUG00000002305	676.211	859.244	493.179	0.573969	-0.800955	9.34645	0.0920467	1	1.03599
																											ENSOCUG00000002306	278.174	327.702	228.646	0.697726	-0.519268	8.09661	0.343778	1	0.463722
																											ENSOCUG00000002309	380.556	373.542	387.571	1.03756	0.0531916	8.57172	0.922853	1	0.0348674
																											ENSOCUG00000002310	152.998	151.172	154.823	1.02415	0.0344301	7.25726	0.96817	1	0.0140486
																											ENSOCUG00000002311	221.632	213.592	229.672	1.07528	0.104718	7.79107	0.86299	1	0.0639941
																											ENSOCUG00000002312	624.895	581.282	668.509	1.15006	0.201709	9.28395	0.67484	1	0.170799
																											ENSOCUG00000002313	27.9087	31.2098	24.6077	0.788462	-0.342888	4.79248	0.809189	1	0.0919498
																											ENSOCUG00000002315	1197.82	1109.9	1285.75	1.15844	0.212187	10.2223	0.637336	1	0.195631
																											ENSOCUG00000002316	242.713	231.147	254.279	1.10008	0.137603	7.92147	0.81327	1	0.0897654
																											ENSOCUG00000002318	186.608	159.95	213.267	1.33333	0.415037	7.529	0.49363	1	0.306598
																											ENSOCUG00000002320	629.447	563.726	695.167	1.23316	0.302366	9.29003	0.527707	1	0.277607
																											ENSOCUG00000002322	211.679	201.888	221.469	1.09699	0.13355	7.72419	0.82568	1	0.083188
																											ENSOCUG00000002323	281.838	284.789	278.887	0.979276	-0.0302119	8.13864	0.962928	1	0.0164061
																											ENSOCUG00000002324	1510.1	1487.34	1532.85	1.0306	0.043486	10.5603	0.923142	1	0.0347317
																											ENSOCUG00000002325	368.99	404.752	333.229	0.823293	-0.280522	8.52063	0.590025	1	0.22913
																											ENSOCUG00000002326	55.3548	60.4689	50.2407	0.830852	-0.267337	5.78445	0.786915	1	0.104072
																											ENSOCUG00000002332	325.602	337.455	313.748	0.929747	-0.105091	8.34601	0.847866	1	0.071673
																											ENSOCUG00000002334	43.5261	41.9381	45.1141	1.07573	0.105317	5.44285	0.941554	1	0.0261549
																											ENSOCUG00000002338	24.1701	37.0616	11.2785	0.304318	-1.71635	4.35368	0.219535	1	0.658497
																											ENSOCUG00000002339	326.289	330.628	321.951	0.973754	-0.0383709	8.34988	0.94839	1	0.0230129
																											ENSOCUG00000002341	4271.37	3983.14	4559.6	1.14472	0.194999	12.0572	0.646529	1	0.189412
																											ENSOCUG00000002344	1027.67	828.034	1227.31	1.4822	0.567736	9.97741	0.212244	1	0.673164
																											ENSOCUG00000002346	460.919	538.368	383.47	0.712282	-0.48948	8.82771	0.327041	1	0.485398
																											ENSOCUG00000002349	13.0791	9.75305	16.4051	1.68205	0.750222	3.66096	0.718971	1	0.143288
																											ENSOCUG00000002350	78.0244	76.0738	79.975	1.05128	0.0721498	6.2854	0.945176	1	0.0244872
																											ENSOCUG00000002352	757.149	761.713	752.585	0.988017	-0.0173927	9.56441	0.973446	1	0.0116883
																											ENSOCUG00000002353	343.932	302.344	385.52	1.2751	0.350614	8.41536	0.50529	1	0.296459
																											ENSOCUG00000002357	6.10191	1.95061	10.2532	5.25641	2.39408	2.16096	0.481812	1	0.317122
																											ENSOCUG00000002358	350.697	378.418	322.976	0.853489	-0.228555	8.44956	0.664715	1	0.177364
																											ENSOCUG00000002359	171.879	174.58	169.178	0.969059	-0.0453438	7.42507	0.951463	1	0.0216081
																											ENSOCUG00000002360	832.71	913.861	751.56	0.822401	-0.282086	9.69479	0.543311	1	0.264951
																											ENSOCUG00000002361	358.8	462.294	255.305	0.552256	-0.856592	8.42437	0.10099	1	0.995722
																											ENSOCUG00000002362	31.3223	38.0369	24.6077	0.646943	-0.62829	4.93518	0.612163	1	0.213133
																											ENSOCUG00000002363	42.9134	45.8393	39.9875	0.87234	-0.197037	5.42	0.86917	1	0.0608955
																											ENSOCUG00000002364	3.48859	3.90122	3.07596	0.788462	-0.342888	1.79248	1	1	0
																											ENSOCUG00000002366	22.1569	15.6049	28.709	1.83974	0.879505	4.40368	0.549368	1	0.260137
																											ENSOCUG00000002367	1570.42	1414.19	1726.64	1.22094	0.287989	10.6098	0.514359	1	0.288734
																											ENSOCUG00000002368	509.572	540.319	478.825	0.886189	-0.174314	8.99051	0.725257	1	0.139508
																											ENSOCUG00000002369	16.7552	26.3332	7.17724	0.272555	-1.87538	3.78112	0.275087	1	0.560531
																											ENSOCUG00000002371	1034.22	1092.34	976.105	0.89359	-0.162315	10.0121	0.722059	1	0.141428
																											ENSOCUG00000002372	672.36	649.553	695.167	1.07022	0.0979129	9.39226	0.838929	1	0.0762749
																											ENSOCUG00000002375	2494.38	2208.09	2780.67	1.25931	0.332633	11.2749	0.441376	1	0.355192
																											ENSOCUG00000002376	72.6227	86.8021	58.4433	0.673293	-0.570694	6.15431	0.494265	1	0.30604
																											ENSOCUG00000002378	462.782	485.702	439.862	0.905622	-0.143018	8.85242	0.777319	1	0.109401
																											ENSOCUG00000002379	923.151	765.614	1080.69	1.41153	0.49726	9.8291	0.278821	1	0.554675
																											ENSOCUG00000002380	656.755	618.343	695.167	1.12424	0.168952	9.35674	0.724148	1	0.140173
																											ENSOCUG00000002381	7.87746	12.679	3.07596	0.242604	-2.04333	2.6427	0.465775	1	0.331824
																											ENSOCUG00000002383	6.95217	8.77774	5.1266	0.584046	-0.775847	2.74593	0.825173	1	0.0834552
																											ENSOCUG00000002384	182.682	153.123	212.241	1.38609	0.471016	7.49405	0.439174	1	0.357363
																											ENSOCUG00000002386	215.492	233.098	197.887	0.848943	-0.23626	7.74666	0.688889	1	0.161851
																											ENSOCUG00000002387	303.707	331.604	275.811	0.83175	-0.265779	8.24043	0.623777	1	0.204971
																											ENSOCUG00000002389	1074.37	1106	1042.75	0.942816	-0.0849512	10.0687	0.852916	1	0.0690938
																											ENSOCUG00000002390	80.2626	88.7527	71.7724	0.808679	-0.306362	6.31854	0.709421	1	0.149096
																											ENSOCUG00000002391	477.349	457.418	497.28	1.08715	0.120547	8.89764	0.81133	1	0.0908025
																											ENSOCUG00000002393	87.6774	99.4811	75.8737	0.762695	-0.390822	6.44094	0.617859	1	0.209111
																											ENSOCUG00000002394	2527.88	2441.19	2614.57	1.07102	0.0989887	11.3029	0.819235	1	0.0865916
																											ENSOCUG00000002395	410.841	432.06	389.622	0.901777	-0.149157	8.68051	0.772548	1	0.112074
																											ENSOCUG00000002396	319.537	354.036	285.039	0.805114	-0.312735	8.31138	0.558741	1	0.25279
																											ENSOCUG00000002397	317.774	362.813	272.735	0.751723	-0.411727	8.29722	0.440722	1	0.355835
																											ENSOCUG00000002398	243.076	197.012	289.14	1.46763	0.55349	7.89888	0.327422	1	0.484892
																											ENSOCUG00000002399	4.97656	5.85183	4.10128	0.700855	-0.512813	2.29248	0.943943	1	0.0250543
																											ENSOCUG00000002401	16.5927	12.679	20.5064	1.61736	0.693638	4.01118	0.69844	1	0.155871
																											ENSOCUG00000002403	278.362	220.419	336.305	1.52575	0.609523	8.08887	0.266072	1	0.575
																											ENSOCUG00000002406	94.267	102.407	86.1269	0.841026	-0.249778	6.55328	0.748281	1	0.125935
																											ENSOCUG00000002409	163.889	146.296	181.482	1.24051	0.310937	7.34821	0.62345	1	0.205199
																											ENSOCUG00000002410	840.575	747.084	934.067	1.25028	0.322256	9.70625	0.486778	1	0.312669
																											ENSOCUG00000002411	11.4661	12.679	10.2532	0.808679	-0.306362	3.51118	0.924219	1	0.034225
																											ENSOCUG00000002413	9.95311	11.7037	8.20256	0.700855	-0.512813	3.29248	0.858449	1	0.0662857
																											ENSOCUG00000002414	519.312	460.344	578.281	1.25619	0.329058	9.0111	0.502901	1	0.298518
																											ENSOCUG00000002417	553.198	578.356	528.04	0.913002	-0.13131	9.11016	0.789673	1	0.102553
																											ENSOCUG00000002418	35.9862	36.0863	35.8862	0.994456	-0.00802056	5.16937	1	1	0
																											ENSOCUG00000002419	2056.46	2112.51	2000.4	0.94693	-0.0786697	11.0054	0.857481	1	0.0667754
																											ENSOCUG00000002421	273.285	258.456	288.115	1.11476	0.156728	8.09214	0.780418	1	0.107673
																											ENSOCUG00000002424	123.226	132.641	113.811	0.858032	-0.220897	6.94094	0.7545	1	0.122341
																											ENSOCUG00000002425	9.69053	1.95061	17.4304	8.9359	3.15961	2.54373	0.216841	1	0.663859
																											ENSOCUG00000002426	59.5436	37.0616	82.0256	2.21323	1.14615	5.78493	0.202917	1	0.692681
																											ENSOCUG00000002427	99.3185	105.333	93.3042	0.885802	-0.174943	6.63134	0.823062	1	0.0845677
																											ENSOCUG00000002428	324.701	292.591	356.812	1.21949	0.286275	8.33588	0.591615	1	0.227961
																											ENSOCUG00000002429	1285.86	1215.23	1356.5	1.11625	0.158659	10.3263	0.723509	1	0.140556
																											ENSOCUG00000002431	34.8859	39.0122	30.7596	0.788462	-0.342888	5.11441	0.781725	1	0.106946
																											ENSOCUG00000002432	721.501	812.429	630.572	0.776157	-0.36558	9.48331	0.437446	1	0.359076
																											ENSOCUG00000002433	97.1554	89.728	104.583	1.16555	0.221013	6.59799	0.77541	1	0.110468
																											ENSOCUG00000002434	90.9534	91.6787	90.2282	0.984179	-0.0230074	6.50701	0.992315	1	0.0033505
																											ENSOCUG00000002436	17.9556	19.5061	16.4051	0.841026	-0.249778	4.16096	0.909763	1	0.0410716
																											ENSOCUG00000002437	233.298	218.468	248.128	1.13576	0.183658	7.86311	0.752379	1	0.123563
																											ENSOCUG00000002438	121.363	105.333	137.393	1.30437	0.383351	6.91049	0.580839	1	0.235944
																											ENSOCUG00000002439	278.375	279.912	276.837	0.989011	-0.0159415	8.12086	0.984148	1	0.0069396
																											ENSOCUG00000002441	786.008	835.836	736.18	0.880771	-0.183162	9.6155	0.695705	1	0.157575
																											ENSOCUG00000002442	559.05	510.084	608.015	1.19199	0.253371	9.12128	0.602882	1	0.219768
																											ENSOCUG00000002444	47.6524	40.9628	54.342	1.32662	0.407753	5.56012	0.691115	1	0.16045
																											ENSOCUG00000002445	1055.57	1119.65	991.485	0.885531	-0.175385	10.0411	0.700045	1	0.154874
																											ENSOCUG00000002447	56.0675	52.6665	59.4686	1.12915	0.175243	5.80643	0.86608	1	0.0624422
																											ENSOCUG00000002448	62.0819	78.0244	46.1394	0.591346	-0.757925	5.90689	0.39242	1	0.406249
																											ENSOCUG00000002449	674.936	669.059	680.813	1.01757	0.0251245	9.39855	0.961067	1	0.0172465
																											ENSOCUG00000002450	10.2032	1.95061	18.4558	9.46154	3.24207	2.58496	0.192693	1	0.715134
																											ENSOCUG00000002451	957.549	923.614	991.485	1.07348	0.102301	9.9023	0.824735	1	0.0836855
																											ENSOCUG00000002452	4.53892	2.92591	6.15192	2.10256	1.07215	2.08496	0.825624	1	0.0832175
																											ENSOCUG00000002455	577.693	642.726	512.66	0.797634	-0.326201	9.16496	0.500357	1	0.30072
																											ENSOCUG00000002456	395.799	438.887	352.71	0.803647	-0.315367	8.62002	0.539016	1	0.268399
																											ENSOCUG00000002458	35.4986	35.111	35.8862	1.02208	0.0315078	5.1496	1	1	0
																											ENSOCUG00000002461	44.864	49.7405	39.9875	0.803922	-0.314873	5.47891	0.771713	1	0.112544
																											ENSOCUG00000002462	3.02595	1.95061	4.10128	2.10256	1.07215	1.5	0.897402	1	0.0470132
																											ENSOCUG00000002463	682.638	648.578	716.699	1.10503	0.144088	9.41318	0.762796	1	0.117592
																											ENSOCUG00000002464	25.3954	29.2591	21.5317	0.735897	-0.442423	4.6496	0.760118	1	0.119119
																											ENSOCUG00000002466	9.02782	7.80244	10.2532	1.3141	0.394078	3.16096	0.913862	1	0.0391193
																											ENSOCUG00000002468	6.46452	7.80244	5.1266	0.657051	-0.605922	2.66096	0.886295	1	0.0524215
																											ENSOCUG00000002473	442.438	339.406	545.47	1.60713	0.684489	8.74911	0.173456	1	0.760812
																											ENSOCUG00000002476	232.96	211.641	254.279	1.20147	0.264795	7.85787	0.645969	1	0.189789
																											ENSOCUG00000002477	4.4889	4.87652	4.10128	0.841026	-0.249778	2.16096	1	1	0
																											ENSOCUG00000002478	29.6718	22.432	36.9115	1.64548	0.718513	4.84674	0.569599	1	0.244431
																											ENSOCUG00000002481	6.43951	8.77774	4.10128	0.467236	-1.09778	2.58496	0.749565	1	0.125191
																											ENSOCUG00000002484	334.705	342.332	327.077	0.955439	-0.0657648	8.38637	0.906279	1	0.0427381
																											ENSOCUG00000002486	425.395	344.283	506.508	1.4712	0.556993	8.70595	0.270744	1	0.567442
																											ENSOCUG00000002489	491.829	412.554	571.103	1.38431	0.469169	8.92302	0.342676	1	0.465116
																											ENSOCUG00000002492	5.46421	6.82713	4.10128	0.600733	-0.735205	2.40368	0.875018	1	0.0579828
																											ENSOCUG00000002494	39.8875	43.8887	35.8862	0.817664	-0.29042	5.31057	0.804076	1	0.0947029
																											ENSOCUG00000002495	248.353	231.147	265.558	1.14887	0.200215	7.95278	0.725977	1	0.139077
																											ENSOCUG00000002496	1.48797	1.95061	1.02532	0.525641	-0.92785	0.5	1	1	0
																											ENSOCUG00000002497	33.2979	40.9628	25.633	0.625763	-0.676311	5.01809	0.571211	1	0.243203
																											ENSOCUG00000002498	370.028	344.283	395.774	1.14956	0.201082	8.52799	0.700597	1	0.154532
																											ENSOCUG00000002503	12.954	14.6296	11.2785	0.77094	-0.375309	3.68316	0.881926	1	0.054568
																											ENSOCUG00000002504	73.9731	74.1232	73.8231	0.995951	-0.00585273	6.20893	1	1	0
																											ENSOCUG00000002505	234.198	223.345	245.052	1.09719	0.133813	7.87004	0.820284	1	0.0860358
																											ENSOCUG00000002506	1675.44	1377.13	1973.74	1.43323	0.519268	10.6871	0.238261	1	0.622948
																											ENSOCUG00000002507	6.56455	3.90122	9.22788	2.36538	1.24207	2.58496	0.705852	1	0.151287
																											ENSOCUG00000002509	44.864	49.7405	39.9875	0.803922	-0.314873	5.47891	0.771713	1	0.112544
																											ENSOCUG00000002510	15.93	18.5308	13.3292	0.719298	-0.475338	3.97418	0.809403	1	0.0918352
																											ENSOCUG00000002512	251.841	235.048	268.634	1.14289	0.192683	7.97316	0.735288	1	0.133543
																											ENSOCUG00000002518	511.923	528.615	495.23	0.936844	-0.0941199	8.99901	0.85144	1	0.0698459
																											ENSOCUG00000002519	117.187	108.259	126.114	1.16493	0.220248	6.86847	0.759533	1	0.119454
																											ENSOCUG00000002522	28.0588	25.3579	30.7596	1.21302	0.278601	4.80367	0.849852	1	0.0706566
																											ENSOCUG00000002523	130.116	123.864	136.368	1.10095	0.138748	7.02198	0.845999	1	0.07263
																											ENSOCUG00000002528	426.658	474.973	378.343	0.796557	-0.328151	8.72763	0.517141	1	0.286391
																											ENSOCUG00000002530	660.256	801.701	518.812	0.64714	-0.627851	9.33299	0.187012	1	0.728132
																											ENSOCUG00000002533	346.258	291.616	400.9	1.37475	0.459173	8.41751	0.381467	1	0.418543
																											ENSOCUG00000002535	44.2638	33.1604	55.3673	1.66968	0.739574	5.42118	0.473252	1	0.324908
																											ENSOCUG00000002536	87.3523	72.1726	102.532	1.42065	0.506553	6.42665	0.514626	1	0.288508
																											ENSOCUG00000002537	442.701	389.147	496.255	1.27524	0.350768	8.77955	0.485739	1	0.313597
																											ENSOCUG00000002541	1761.25	1689.23	1833.27	1.08527	0.118058	10.7812	0.788627	1	0.103129
																											ENSOCUG00000002542	27.7212	18.5308	36.9115	1.9919	0.994147	4.70893	0.441859	1	0.354717
																											ENSOCUG00000002543	902.582	748.059	1057.11	1.41313	0.498896	9.79646	0.278232	1	0.555592
																											ENSOCUG00000002548	4.58893	0.975305	8.20256	8.41026	3.07215	1.5	0.490165	1	0.309658
																											ENSOCUG00000002549	3210.4	3554.01	2866.8	0.806637	-0.310009	11.6402	0.469285	1	0.328564
																											ENSOCUG00000002551	6.51454	5.85183	7.17724	1.2265	0.294542	2.69616	0.977826	1	0.00973838
																											ENSOCUG00000002554	228.134	239.925	216.343	0.901709	-0.149266	7.83181	0.800439	1	0.0966719
																											ENSOCUG00000002555	1271.25	1165.49	1377.01	1.18148	0.240598	10.307	0.591156	1	0.228298
																											ENSOCUG00000002556	1123.14	1323.49	922.788	0.697239	-0.520274	10.11	0.249547	1	0.602848
																											ENSOCUG00000002559	104.295	111.185	97.4054	0.876068	-0.190885	6.70137	0.801923	1	0.0958675
																											ENSOCUG00000002563	216.493	194.086	238.9	1.2309	0.299711	7.75041	0.608954	1	0.215416
																											ENSOCUG00000002566	1.48797	1.95061	1.02532	0.525641	-0.92785	0.5	1	1	0
																											ENSOCUG00000002569	8.61519	3.90122	13.3292	3.41667	1.77259	2.85022	0.496391	1	0.304176
																											ENSOCUG00000002572	113.123	86.8021	139.444	1.60645	0.683879	6.7816	0.331312	1	0.479763
																											ENSOCUG00000002573	700.882	716.849	684.914	0.955451	-0.0657464	9.45265	0.891986	1	0.0496419
																											ENSOCUG00000002574	415.317	457.418	373.217	0.81592	-0.2935	8.69062	0.564521	1	0.24832
																											ENSOCUG00000002577	27.1835	19.5061	34.8609	1.78718	0.837685	4.7047	0.523889	1	0.280761
																											ENSOCUG00000002580	14.9047	18.5308	11.2785	0.608637	-0.716346	3.85368	0.709223	1	0.149217
																											ENSOCUG00000002581	240.688	230.172	251.204	1.09137	0.126145	7.90964	0.829638	1	0.0811112
																											ENSOCUG00000002582	398.45	335.505	461.394	1.37522	0.459666	8.62002	0.368791	1	0.43322
																											ENSOCUG00000002583	475.786	418.406	533.167	1.27428	0.349684	8.8836	0.482109	1	0.316855
																											ENSOCUG00000002587	56.6427	70.2219	43.0635	0.613248	-0.705458	5.78112	0.444877	1	0.35176
																											ENSOCUG00000002591	34.4733	35.111	33.8356	0.963675	-0.0533811	5.10716	0.991629	1	0.00365081
																											ENSOCUG00000002593	862.482	932.391	792.573	0.850043	-0.234392	9.7476	0.612619	1	0.212809
																											ENSOCUG00000002594	2888.42	2695.74	3081.09	1.14295	0.192757	11.4928	0.653939	1	0.184463
																											ENSOCUG00000002595	9.51547	8.77774	10.2532	1.16809	0.224153	3.24593	0.972376	1	0.0121656
																											ENSOCUG00000002596	19.4186	22.432	16.4051	0.731327	-0.451412	4.26178	0.793534	1	0.100435
																											ENSOCUG00000002598	1516.51	1497.09	1535.93	1.02594	0.0369488	10.5664	0.934903	1	0.0292334
																											ENSOCUG00000002601	521.1	450.591	591.61	1.31296	0.392828	9.01209	0.423215	1	0.373439
																											ENSOCUG00000002603	65.6205	79.975	51.266	0.641026	-0.641546	6.0007	0.460074	1	0.337172
																											ENSOCUG00000002604	968.665	869.972	1067.36	1.22689	0.295004	9.91233	0.518936	1	0.284886
																											ENSOCUG00000002605	3.00094	2.92591	3.07596	1.05128	0.0721498	1.58496	1	1	0
																											ENSOCUG00000002606	13.3917	17.5555	9.22788	0.525641	-0.92785	3.66993	0.643286	1	0.191596
																											ENSOCUG00000002609	1.00031	0.975305	1.02532	1.05128	0.0721498	1.28137e-15	1	1	0
																											ENSOCUG00000002610	311.685	300.394	322.976	1.07517	0.104571	8.283	0.850147	1	0.0705061
																											ENSOCUG00000002611	62.3195	48.7652	75.8737	1.5559	0.637747	5.92665	0.47219	1	0.325883
																											ENSOCUG00000002612	4.97656	5.85183	4.10128	0.700855	-0.512813	2.29248	0.943943	1	0.0250543
																											ENSOCUG00000002617	22.5696	19.5061	25.633	1.3141	0.394078	4.48289	0.804479	1	0.094485
																											ENSOCUG00000002619	127.502	125.814	129.19	1.02683	0.0382025	6.99425	0.967562	1	0.0143211
																											ENSOCUG00000002623	356.411	295.517	417.305	1.41212	0.497861	8.45603	0.339895	1	0.468655
																											ENSOCUG00000002626	91.3285	77.0491	105.608	1.37066	0.45487	6.49514	0.552855	1	0.257388
																											ENSOCUG00000002627	267.709	276.011	259.406	0.939839	-0.0895149	8.06383	0.87747	1	0.0567679
																											ENSOCUG00000002628	244.827	248.703	240.95	0.968829	-0.0456867	7.93544	0.942981	1	0.0254969
																											ENSOCUG00000002629	706.433	620.294	792.573	1.27774	0.353591	9.4536	0.453685	1	0.343245
																											ENSOCUG00000002630	29.2967	37.0616	21.5317	0.580972	-0.78346	4.82012	0.536834	1	0.27016
																											ENSOCUG00000002631	196.887	158.975	234.798	1.47695	0.562625	7.59397	0.344935	1	0.462263
																											ENSOCUG00000002632	13.1041	8.77774	17.4304	1.98575	0.989688	3.62869	0.623205	1	0.205369
																											ENSOCUG00000002636	797.874	792.923	802.826	1.01249	0.0179067	9.63999	0.972245	1	0.0122241
																											ENSOCUG00000002637	101.369	105.333	97.4054	0.924739	-0.112882	6.66237	0.889851	1	0.0506828
																											ENSOCUG00000002638	144.583	139.469	149.697	1.07334	0.102103	7.17485	0.884986	1	0.0530634
																											ENSOCUG00000002640	209.278	255.53	163.026	0.637992	-0.64839	7.67315	0.268809	1	0.570555
																											ENSOCUG00000002641	416.618	406.702	426.533	1.04876	0.0686859	8.70217	0.896744	1	0.0473314
																											ENSOCUG00000002643	500.306	441.813	558.8	1.26479	0.338895	8.95674	0.492518	1	0.307578
																											ENSOCUG00000002646	2.48828	2.92591	2.05064	0.700855	-0.512813	1.29248	1	1	0
																											ENSOCUG00000002647	259.256	245.777	272.735	1.10969	0.150152	8.01628	0.792407	1	0.101051
																											ENSOCUG00000002652	120.175	131.666	108.684	0.825451	-0.276745	6.90237	0.69469	1	0.158209
																											ENSOCUG00000002653	415.58	387.196	443.964	1.14661	0.197378	8.69561	0.699859	1	0.154989
																											ENSOCUG00000002656	2.02563	0.975305	3.07596	3.15385	1.65711	0.792481	0.890414	1	0.0504081
																											ENSOCUG00000002657	3266.96	3367.73	3166.19	0.940156	-0.0890278	11.673	0.835719	1	0.0779395
																											ENSOCUG00000002660	95.88	59.4936	132.266	2.2232	1.15264	6.47098	0.123201	1	0.909385
																											ENSOCUG00000002661	5.90184	9.75305	2.05064	0.210256	-2.24978	2.16096	0.520833	1	0.283301
																											ENSOCUG00000002663	1065.9	996.762	1135.03	1.13872	0.18741	10.0548	0.68017	1	0.167382
																											ENSOCUG00000002665	138.418	119.962	156.874	1.30769	0.387023	7.09995	0.560088	1	0.251743
																											ENSOCUG00000002667	1.00031	0.975305	1.02532	1.05128	0.0721498	1.28137e-15	1	1	0
																											ENSOCUG00000002669	646.965	780.244	513.686	0.658365	-0.60304	9.30626	0.206048	1	0.686032
																											ENSOCUG00000002670	282.663	252.604	312.723	1.238	0.308007	8.13474	0.574797	1	0.240485
																											ENSOCUG00000002671	336.568	369.641	303.495	0.821054	-0.284451	8.38775	0.591407	1	0.228113
																											ENSOCUG00000002672	107.108	101.432	112.785	1.11193	0.15307	6.7409	0.84173	1	0.0748274
																											ENSOCUG00000002674	17.1053	12.679	21.5317	1.69822	0.764027	4.04638	0.659875	1	0.180538
																											ENSOCUG00000002676	83.4136	85.8268	81.0003	0.943765	-0.0835011	6.38161	0.930793	1	0.0311467
																											ENSOCUG00000002677	1441.93	1466.86	1416.99	0.966005	-0.0498972	10.4936	0.911925	1	0.0400409
																											ENSOCUG00000002679	637.824	636.874	638.775	1.00298	0.00429896	9.31701	0.996571	1	0.00149185
																											ENSOCUG00000002682	26.0081	25.3579	26.6583	1.05128	0.0721498	4.70044	0.989273	1	0.00468363
																											ENSOCUG00000002683	1554.44	1597.55	1511.32	0.946025	-0.080049	10.6016	0.857348	1	0.0668428
																											ENSOCUG00000002686	741.782	541.294	942.27	1.74077	0.799727	9.48013	0.0891537	1	1.04986
																											ENSOCUG00000002688	41.438	23.4073	59.4686	2.5406	1.34517	5.22147	0.204247	1	0.689845
																											ENSOCUG00000002689	274.261	300.394	248.128	0.826007	-0.275774	8.09282	0.618567	1	0.208613
																											ENSOCUG00000002690	1090.38	1161.59	1019.17	0.877392	-0.188706	10.0875	0.677513	1	0.169082
																											ENSOCUG00000002692	11.9537	13.6543	10.2532	0.750916	-0.413277	3.56464	0.874858	1	0.0580623
																											ENSOCUG00000002694	124.301	130.691	117.912	0.90222	-0.148449	6.95579	0.83742	1	0.0770565
																											ENSOCUG00000002695	328.378	309.172	347.584	1.12424	0.168952	8.35674	0.753433	1	0.122955
																											ENSOCUG00000002696	12.9791	13.6543	12.3038	0.901099	-0.150243	3.69616	0.982479	1	0.00767652
																											ENSOCUG00000002698	68.8215	75.0985	62.5445	0.832834	-0.263899	6.09876	0.76683	1	0.115301
																											ENSOCUG00000002699	135.492	114.111	156.874	1.37475	0.459173	7.06388	0.490793	1	0.309101
																											ENSOCUG00000002701	19.6436	13.6543	25.633	1.87729	0.908651	4.22561	0.563377	1	0.249201
																											ENSOCUG00000002702	35.2485	44.864	25.633	0.571349	-0.807556	5.08371	0.482928	1	0.316118
																											ENSOCUG00000002704	943.282	980.181	906.383	0.92471	-0.112927	9.88044	0.806906	1	0.0931772
																											ENSOCUG00000002705	207.602	240.9	174.304	0.723554	-0.466827	7.67888	0.427682	1	0.368879
																											ENSOCUG00000002706	105.195	116.061	94.3295	0.812756	-0.299106	6.70919	0.685327	1	0.164102
																											ENSOCUG00000002707	347.734	394.023	301.444	0.765042	-0.386389	8.42894	0.461642	1	0.335694
																											ENSOCUG00000002710	5892.28	6547.22	5237.34	0.799933	-0.322049	12.5156	0.445965	1	0.3507
																											ENSOCUG00000002711	52.5789	48.7652	56.3926	1.15641	0.209653	5.71261	0.841332	1	0.0750323
																											ENSOCUG00000002712	649.29	689.541	609.04	0.883255	-0.179097	9.33994	0.708558	1	0.149625
																											ENSOCUG00000002715	985.045	710.997	1259.09	1.77088	0.82447	9.88593	0.0718836	1	1.14337
																											ENSOCUG00000002716	525.552	436.937	614.167	1.40562	0.491207	9.01688	0.315817	1	0.500564
																											ENSOCUG00000002718	15.4173	18.5308	12.3038	0.663968	-0.590815	3.91645	0.759877	1	0.119257
																											ENSOCUG00000002719	495.08	525.689	464.47	0.883545	-0.178624	8.94875	0.719858	1	0.142753
																											ENSOCUG00000002720	533.017	485.702	580.331	1.19483	0.256806	9.05233	0.600406	1	0.221555
																											ENSOCUG00000002722	1353.92	1220.11	1487.74	1.21935	0.286116	10.3958	0.520963	1	0.283193
																											ENSOCUG00000002724	401.826	403.776	399.875	0.990338	-0.0140069	8.65041	0.98357	1	0.00719459
																											ENSOCUG00000002725	164.551	140.444	188.659	1.3433	0.425787	7.34674	0.497972	1	0.302795
																											ENSOCUG00000002727	889.541	876.799	902.282	1.02906	0.0413322	9.79677	0.93091	1	0.0310924
																											ENSOCUG00000002728	93.8293	99.4811	88.1776	0.886375	-0.174011	6.54935	0.828313	1	0.0818057
																											ENSOCUG00000002730	241.663	232.123	251.204	1.0822	0.11397	7.91573	0.846497	1	0.0723745
																											ENSOCUG00000002731	24.1576	17.5555	30.7596	1.75214	0.809115	4.53841	0.564784	1	0.248118
																											ENSOCUG00000002733	813.979	924.589	703.37	0.760738	-0.394529	9.6554	0.395912	1	0.402402
																											ENSOCUG00000002736	369.703	436.937	302.47	0.69225	-0.530634	8.50596	0.305887	1	0.514439
																											ENSOCUG00000002737	420.932	418.406	423.457	1.01207	0.0173139	8.71742	0.97792	1	0.00969661
																											ENSOCUG00000002738	186.721	215.542	157.899	0.732568	-0.448966	7.52734	0.458613	1	0.338554
																											ENSOCUG00000002739	223.87	226.271	221.469	0.97878	-0.0309437	7.80643	0.965595	1	0.0152049
																											ENSOCUG00000002740	60.669	73.1479	48.1901	0.658803	-0.60208	5.8917	0.50341	1	0.298078
																											ENSOCUG00000002742	337.856	339.406	336.305	0.990864	-0.0132417	8.40025	0.986272	1	0.00600344
																											ENSOCUG00000002743	2040.65	2209.07	1872.24	0.847524	-0.238674	10.9899	0.583943	1	0.23363
																											ENSOCUG00000002744	12.3163	19.5061	5.1266	0.262821	-1.92785	3.32193	0.351678	1	0.453855
																											ENSOCUG00000002745	3949.31	3887.57	4011.05	1.03177	0.0451144	11.9472	0.916157	1	0.03803
																											ENSOCUG00000002746	259.519	255.53	263.507	1.03122	0.0443513	8.01952	0.94368	1	0.0251752
																											ENSOCUG00000002748	1259.54	1222.06	1297.03	1.06135	0.0859008	10.298	0.849225	1	0.0709772
																											ENSOCUG00000002750	6.48953	6.82713	6.15192	0.901099	-0.150243	2.69616	1	1	0
																											ENSOCUG00000002751	1132.14	1172.32	1091.97	0.93146	-0.102434	10.1439	0.821829	1	0.0852184
																											ENSOCUG00000002752	58.2182	48.7652	67.6712	1.38769	0.472688	5.84413	0.609116	1	0.2153
																											ENSOCUG00000002754	206.327	250.653	162.001	0.646313	-0.629694	7.6547	0.284622	1	0.545732
																											ENSOCUG00000002755	20.2813	8.77774	31.7849	3.62108	1.85642	4.06206	0.227325	1	0.643352
																											ENSOCUG00000002756	377.268	401.826	352.71	0.877769	-0.188086	8.55638	0.718489	1	0.14358
																											ENSOCUG00000002760	544.47	638.825	450.116	0.7046	-0.505124	9.06671	0.300015	1	0.522857
																											ENSOCUG00000002762	196.324	200.913	191.735	0.954319	-0.0674563	7.6167	0.918346	1	0.0369938
																											ENSOCUG00000002763	1061.02	1106.97	1015.07	0.916977	-0.125042	10.0499	0.784104	1	0.105626
																											ENSOCUG00000002764	74.2857	81.9256	66.6458	0.813492	-0.2978	6.20734	0.726627	1	0.138688
																											ENSOCUG00000002765	517.687	523.739	511.635	0.97689	-0.0337325	9.01584	0.949309	1	0.0225926
																											ENSOCUG00000002766	111.085	106.308	115.861	1.08986	0.124144	6.79418	0.872155	1	0.0594063
																											ENSOCUG00000002767	24.5202	23.4073	25.633	1.09509	0.131043	4.61441	0.954912	1	0.0200365
																											ENSOCUG00000002768	369.916	368.665	371.166	1.00678	0.00975325	8.53104	0.99089	1	0.00397458
																											ENSOCUG00000002770	16.7552	26.3332	7.17724	0.272555	-1.87538	3.78112	0.275087	1	0.560531
																											ENSOCUG00000002773	25.2079	16.5802	33.8356	2.04072	1.02908	4.56593	0.448822	1	0.347925
																											ENSOCUG00000002775	878.187	879.725	876.649	0.996503	-0.00505323	9.77838	0.994072	1	0.00258237
																											ENSOCUG00000002776	148.296	134.592	162.001	1.20364	0.267406	7.20615	0.683834	1	0.165049
																											ENSOCUG00000002777	252.291	217.493	287.09	1.32	0.400533	7.96509	0.475706	1	0.322662
																											ENSOCUG00000002778	891.841	947.021	836.661	0.883467	-0.178752	9.79788	0.699	1	0.155523
																											ENSOCUG00000002779	1714.29	1721.41	1707.16	0.991719	-0.0119962	10.7434	0.979679	1	0.00891626
																											ENSOCUG00000002780	59.0685	55.5924	62.5445	1.12506	0.169997	5.88181	0.86685	1	0.0620563
																											ENSOCUG00000002781	429.147	437.912	420.381	0.959968	-0.0589417	8.74503	0.911545	1	0.0402219
																											ENSOCUG00000002782	986.146	1027.97	944.32	0.918625	-0.122452	9.94436	0.789894	1	0.102431
																											ENSOCUG00000002784	109.959	110.209	109.709	0.995462	-0.00656219	6.78082	1	1	0
																											ENSOCUG00000002786	161.475	180.431	142.52	0.789882	-0.340291	7.32516	0.592017	1	0.227666
																											ENSOCUG00000002788	40.7752	29.2591	52.2913	1.78718	0.837685	5.28966	0.433167	1	0.363345
																											ENSOCUG00000002789	21.8318	28.2838	15.3798	0.543767	-0.878941	4.38244	0.553832	1	0.256622
																											ENSOCUG00000002790	2030.93	1968.17	2093.7	1.06378	0.0892065	10.9872	0.838567	1	0.0764623
																											ENSOCUG00000002791	2298.12	1864.78	2731.45	1.46476	0.550661	11.1401	0.204491	1	0.689325
																											ENSOCUG00000002793	40.7252	31.2098	50.2407	1.60978	0.68686	5.30735	0.523346	1	0.281211
																											ENSOCUG00000002794	41.4755	41.9381	41.0128	0.977937	-0.0321869	5.3741	1	1	0
																											ENSOCUG00000002795	192.66	203.839	181.482	0.89032	-0.167604	7.58748	0.785835	1	0.104669
																											ENSOCUG00000002798	780.044	648.578	911.51	1.4054	0.490979	9.58663	0.292795	1	0.533436
																											ENSOCUG00000002800	5.10159	0.975305	9.22788	9.46154	3.24207	1.58496	0.431622	1	0.364896
																											ENSOCUG00000002801	136.118	129.716	142.52	1.09871	0.135808	7.08711	0.846873	1	0.0721815
																											ENSOCUG00000002802	152.923	114.111	191.735	1.68025	0.74868	7.20863	0.241415	1	0.617235
																											ENSOCUG00000002803	112.498	111.185	113.811	1.02362	0.0336756	6.81365	0.975813	1	0.0106333
																											ENSOCUG00000002805	158.962	138.493	179.431	1.29559	0.373614	7.30048	0.55716	1	0.25402
																											ENSOCUG00000002807	65.3829	69.2466	61.5192	0.888407	-0.170707	6.02832	0.858721	1	0.0661482
																											ENSOCUG00000002809	177.981	216.518	139.444	0.644029	-0.634803	7.44094	0.2998	1	0.523168
																											ENSOCUG00000002811	59.156	72.1726	46.1394	0.639293	-0.64545	5.85065	0.477162	1	0.321334
																											ENSOCUG00000002813	14.367	19.5061	9.22788	0.473077	-1.07985	3.74593	0.567797	1	0.245807
																											ENSOCUG00000002814	67.0335	84.8515	49.2154	0.580018	-0.785831	6.01395	0.359572	1	0.444215
																											ENSOCUG00000002815	862.657	765.614	959.7	1.2535	0.325966	9.74346	0.480645	1	0.318176
																											ENSOCUG00000002818	43.4386	65.3454	21.5317	0.329506	-1.60162	5.2292	0.125379	1	0.901774
																											ENSOCUG00000002819	263.157	213.592	312.723	1.46411	0.550028	8.01373	0.321637	1	0.492635
																											ENSOCUG00000002820	23.7824	32.1851	15.3798	0.477855	-1.06535	4.47564	0.448007	1	0.348715
																											ENSOCUG00000002822	7.53986	5.85183	9.22788	1.57692	0.657112	2.87744	0.847747	1	0.0717335
																											ENSOCUG00000002824	719.562	548.121	891.003	1.62556	0.700936	9.44882	0.137067	1	0.863067
																											ENSOCUG00000002827	420.456	436.937	403.976	0.924565	-0.113153	8.7147	0.826976	1	0.0825073
																											ENSOCUG00000002828	5648.8	6845.66	4451.94	0.65033	-0.620756	12.4306	0.14307	1	0.844451
																											ENSOCUG00000002830	379.156	348.184	410.128	1.17791	0.236226	8.56182	0.649075	1	0.187705
																											ENSOCUG00000002831	594.061	544.22	643.901	1.18316	0.242649	9.20937	0.615523	1	0.210755
																											ENSOCUG00000002832	257.405	237.974	276.837	1.1633	0.218228	8.00378	0.699268	1	0.155357
																											ENSOCUG00000002834	211.991	209.691	214.292	1.02194	0.0313161	7.72778	0.966004	1	0.0150209
																											ENSOCUG00000002835	2243.81	2843.01	1644.61	0.578476	-0.789672	11.0784	0.0699123	1	1.15545
																											ENSOCUG00000002836	403.151	432.06	374.242	0.86618	-0.20726	8.65146	0.687036	1	0.16302
																											ENSOCUG00000002838	1818.32	1822.84	1813.79	0.995034	-0.00718274	10.8284	0.988327	1	0.00509939
																											ENSOCUG00000002839	626.571	595.911	657.23	1.1029	0.141302	9.2896	0.76983	1	0.113605
																											ENSOCUG00000002840	1636.57	1573.17	1699.98	1.08061	0.111847	10.6754	0.800422	1	0.096681
																											ENSOCUG00000002844	394.498	449.616	339.381	0.754825	-0.405786	8.60966	0.428696	1	0.36785
																											ENSOCUG00000002845	252.879	214.567	291.191	1.35711	0.440537	7.96555	0.432099	1	0.364417
																											ENSOCUG00000002846	669.097	676.862	661.332	0.977056	-0.0334867	9.38597	0.947014	1	0.0236437
																											ENSOCUG00000002847	107.996	126.79	89.2029	0.70355	-0.507275	6.73266	0.480362	1	0.318432
																											ENSOCUG00000002849	224.883	246.752	203.013	0.822742	-0.281487	7.80618	0.628063	1	0.201997
																											ENSOCUG00000002851	156.461	196.036	116.887	0.59625	-0.746012	7.24197	0.240194	1	0.619438
																											ENSOCUG00000002852	473.523	446.69	500.356	1.12014	0.163683	8.88497	0.744537	1	0.128114
																											ENSOCUG00000002855	499.819	520.813	478.825	0.91938	-0.121267	8.96399	0.808777	1	0.0921713
																											ENSOCUG00000002857	557.449	572.504	542.395	0.947408	-0.077943	9.12217	0.875759	1	0.0576153
																											ENSOCUG00000002858	77.8118	104.358	51.266	0.491253	-1.02546	6.19266	0.204288	1	0.689758
																											ENSOCUG00000002859	396.099	387.196	405.002	1.04599	0.0648634	8.62935	0.903835	1	0.0439107
																											ENSOCUG00000002861	433.148	481.801	384.495	0.798038	-0.325471	8.74956	0.519545	1	0.284377
																											ENSOCUG00000002862	13829.5	12218.6	15440.3	1.26367	0.33762	13.7456	0.419834	1	0.376922
																											ENSOCUG00000002863	57.2804	65.3454	49.2154	0.753157	-0.408977	5.82553	0.663351	1	0.178256
																											ENSOCUG00000002864	63.9575	44.864	83.051	1.85117	0.888438	5.93171	0.308734	1	0.510415
																											ENSOCUG00000002865	62.0444	59.4936	64.5952	1.08575	0.118692	5.95401	0.91074	1	0.0406058
																											ENSOCUG00000002867	468.521	481.801	455.242	0.944877	-0.0818016	8.87139	0.873311	1	0.0588311
																											ENSOCUG00000002868	16.4676	17.5555	15.3798	0.876068	-0.190885	4.03841	0.947307	1	0.0235094
																											ENSOCUG00000002869	230.159	200.913	259.406	1.29114	0.368643	7.83475	0.521261	1	0.282945
																											ENSOCUG00000002872	146.708	136.543	156.874	1.1489	0.200255	7.19334	0.764074	1	0.116865
																											ENSOCUG00000002873	49.553	46.8146	52.2913	1.11699	0.159613	5.62869	0.888689	1	0.05125
																											ENSOCUG00000002875	3.05095	0.975305	5.1266	5.25641	2.39408	1.16096	0.708261	1	0.149807
																											ENSOCUG00000002876	22.9322	25.3579	20.5064	0.808679	-0.306362	4.51118	0.854129	1	0.0684764
																											ENSOCUG00000002878	14.517	13.6543	15.3798	1.12637	0.171685	3.85712	0.965292	1	0.0153414
																											ENSOCUG00000002879	163.013	180.431	145.596	0.80693	-0.309485	7.34056	0.625807	1	0.203559
																											ENSOCUG00000002881	497.493	531.541	463.445	0.871889	-0.197784	8.95515	0.690613	1	0.160765
																											ENSOCUG00000002882	457.656	365.739	549.572	1.50263	0.587492	8.80842	0.239918	1	0.619937
																											ENSOCUG00000002883	2.00063	1.95061	2.05064	1.05128	0.0721498	1	1	1	0
																											ENSOCUG00000002884	885.102	750.009	1020.19	1.36024	0.443863	9.7727	0.335507	1	0.474298
																											ENSOCUG00000002885	547.434	543.245	551.622	1.01542	0.0220786	9.0965	0.967891	1	0.0141734
																											ENSOCUG00000002886	50.8159	57.543	44.0888	0.766189	-0.384229	5.65445	0.700624	1	0.154515
																											ENSOCUG00000002887	704.82	663.207	746.433	1.12549	0.170553	9.45859	0.719268	1	0.143109
																											ENSOCUG00000002888	408.903	447.665	370.141	0.826825	-0.274346	8.6691	0.591473	1	0.228065
																											ENSOCUG00000002891	1.48797	1.95061	1.02532	0.525641	-0.92785	0.5	1	1	0
																											ENSOCUG00000002892	258.268	304.295	212.241	0.697485	-0.519765	7.98944	0.351292	1	0.454332
																											ENSOCUG00000002893	5.46421	6.82713	4.10128	0.600733	-0.735205	2.40368	0.875018	1	0.0579828
																											ENSOCUG00000002894	142.67	154.098	131.241	0.851672	-0.231631	7.15189	0.729245	1	0.137127
																											ENSOCUG00000002895	497.518	570.553	424.483	0.743984	-0.426656	8.94289	0.387564	1	0.411657
																											ENSOCUG00000002896	1.00031	0.975305	1.02532	1.05128	0.0721498	1.28137e-15	1	1	0
																											ENSOCUG00000002897	1459.94	1343.97	1575.92	1.17258	0.229691	10.5071	0.604807	1	0.218383
																											ENSOCUG00000002899	14.8171	1.95061	27.6837	14.1923	3.82704	2.87744	0.0648574	1	1.18804
																											ENSOCUG00000002900	155.486	154.098	156.874	1.01801	0.0257569	7.28058	0.978921	1	0.00925234
																											ENSOCUG00000002903	9.61551	4.87652	14.3545	2.94359	1.55758	3.06464	0.519363	1	0.284529
																											ENSOCUG00000002904	846.527	794.873	898.181	1.12997	0.176281	9.72272	0.70446	1	0.152144
																											ENSOCUG00000002908	182.932	183.357	182.507	0.995363	-0.00670563	7.51516	1	1	0
																											ENSOCUG00000002909	8.54017	6.82713	10.2532	1.50183	0.586723	3.06464	0.852579	1	0.0692651
																											ENSOCUG00000002910	1382.28	1313.74	1450.83	1.10435	0.143202	10.4311	0.748419	1	0.125855
																											ENSOCUG00000002913	100.394	143.37	57.4179	0.400488	-1.32017	6.50351	0.074064	1	1.13039
																											ENSOCUG00000002914	316.286	360.863	271.71	0.752945	-0.409383	8.29062	0.44378	1	0.352832
																											ENSOCUG00000002915	68.9465	70.2219	67.6712	0.963675	-0.0533811	6.10716	0.968369	1	0.0139591
																											ENSOCUG00000002919	243.726	251.629	235.824	0.937189	-0.0935874	7.92836	0.874918	1	0.0580324
																											ENSOCUG00000002920	338.243	264.308	412.179	1.55947	0.641052	8.3666	0.223659	1	0.650414
																											ENSOCUG00000002923	7.0522	4.87652	9.22788	1.89231	0.920147	2.74593	0.779153	1	0.108377
																											ENSOCUG00000002924	4460.51	3844.65	5076.36	1.32037	0.400942	12.1091	0.345431	1	0.461639
																											ENSOCUG00000002927	86.9522	87.7774	86.1269	0.981197	-0.0273859	6.44209	0.988559	1	0.00499738
																											ENSOCUG00000002928	619.956	713.923	525.989	0.736759	-0.440735	9.25926	0.357682	1	0.446503
																											ENSOCUG00000002929	16.5927	12.679	20.5064	1.61736	0.693638	4.01118	0.69844	1	0.155871
																											ENSOCUG00000002933	17.0553	14.6296	19.4811	1.33162	0.413187	4.07741	0.830437	1	0.0806933
																											ENSOCUG00000002934	3.48859	3.90122	3.07596	0.788462	-0.342888	1.79248	1	1	0
																											ENSOCUG00000002935	45.7018	37.0616	54.342	1.46626	0.552143	5.48792	0.591095	1	0.228343
																											ENSOCUG00000002936	603.939	598.837	609.04	1.01704	0.0243741	9.23821	0.963242	1	0.0162645
																											ENSOCUG00000002937	31.2098	22.432	39.9875	1.78261	0.83399	4.90448	0.494831	1	0.305544
																											ENSOCUG00000002939	769.24	750.009	788.471	1.05128	0.0721498	9.58684	0.879726	1	0.0556528
																											ENSOCUG00000002940	222.845	186.283	259.406	1.39254	0.477715	7.78021	0.408285	1	0.389037
																											ENSOCUG00000002942	865.045	812.429	917.662	1.12953	0.175721	9.75396	0.70474	1	0.151971
																											ENSOCUG00000002943	2784.07	2986.38	2581.76	0.86451	-0.210046	11.4392	0.625592	1	0.203709
																											ENSOCUG00000002944	311.522	286.74	336.305	1.17286	0.230029	8.27861	0.670228	1	0.173777
																											ENSOCUG00000002945	66.1582	78.9997	53.3167	0.674897	-0.56726	6.02014	0.513583	1	0.28939
																											ENSOCUG00000002947	3.02595	1.95061	4.10128	2.10256	1.07215	1.5	0.897402	1	0.0470132
																											ENSOCUG00000002948	237.124	229.197	245.052	1.06918	0.0964996	7.88869	0.871791	1	0.0595877
																											ENSOCUG00000002949	183.995	201.888	166.102	0.822742	-0.281487	7.51667	0.646513	1	0.189423
																											ENSOCUG00000002950	461.682	488.628	434.736	0.889708	-0.168597	8.84829	0.73811	1	0.131879
																											ENSOCUG00000002951	222.87	265.283	180.456	0.680241	-0.555881	7.77345	0.335651	1	0.474113
																											ENSOCUG00000002952	14.0544	11.7037	16.4051	1.40171	0.487187	3.79248	0.821027	1	0.0856424
																											ENSOCUG00000002953	34.6983	26.3332	43.0635	1.63533	0.70958	5.0736	0.542335	1	0.265732
																											ENSOCUG00000002954	862.395	795.849	928.94	1.16723	0.223092	9.7479	0.629937	1	0.200703
																											ENSOCUG00000002955	145.646	118.012	173.279	1.46832	0.554166	7.15987	0.393595	1	0.404951
																											ENSOCUG00000002958	450.078	421.332	478.825	1.13646	0.184541	8.81108	0.71508	1	0.145645
																											ENSOCUG00000002960	112.423	114.111	110.735	0.970414	-0.0433274	6.81263	0.964677	1	0.015618
																											ENSOCUG00000002961	86.2395	95.5799	76.899	0.804553	-0.313741	6.42176	0.693727	1	0.158811
																											ENSOCUG00000002963	363.426	441.813	285.039	0.645158	-0.632276	8.47115	0.223976	1	0.649799
																											ENSOCUG00000002964	82.5008	61.4442	103.557	1.68539	0.753081	6.31775	0.33986	1	0.4687
																											ENSOCUG00000002965	197.587	171.654	223.52	1.30216	0.380902	7.61381	0.523917	1	0.280737
																											ENSOCUG00000002966	94.6171	88.7527	100.481	1.13215	0.179065	6.56125	0.822202	1	0.0850214
																											ENSOCUG00000002970	148.409	190.184	106.633	0.560684	-0.834741	7.15389	0.195954	1	0.707845
																											ENSOCUG00000002972	826.083	892.404	759.762	0.851366	-0.232148	9.68548	0.617583	1	0.209305
																											ENSOCUG00000002973	82.0131	60.4689	103.557	1.71257	0.776165	6.3062	0.326251	1	0.486448
																											ENSOCUG00000002974	403.439	280.888	525.989	1.8726	0.90504	8.58637	0.0770229	1	1.11338
																											ENSOCUG00000002975	141.119	134.592	147.646	1.09699	0.13355	7.13922	0.847543	1	0.0718381
																											ENSOCUG00000002976	439.95	416.455	463.445	1.11283	0.154236	8.77914	0.761988	1	0.118052
																											ENSOCUG00000002977	174.229	122.888	225.571	1.83557	0.87623	7.37932	0.154921	1	0.809889
																											ENSOCUG00000002981	694.942	608.59	781.294	1.28378	0.360395	9.42952	0.445874	1	0.350788
																											ENSOCUG00000002982	88.1025	82.9009	93.3042	1.12549	0.170553	6.45859	0.836548	1	0.0775092
																											ENSOCUG00000002983	1.48797	1.95061	1.02532	0.525641	-0.92785	0.5	1	1	0
																											ENSOCUG00000002984	1689.82	1496.12	1883.51	1.25893	0.332203	10.7131	0.450027	1	0.346761
																											ENSOCUG00000002988	50.4533	51.6912	49.2154	0.952104	-0.0708082	5.65644	0.963669	1	0.016072
																											ENSOCUG00000002991	451.204	457.418	444.989	0.972828	-0.0397431	8.8175	0.941321	1	0.0262621
																											ENSOCUG00000002993	300.957	278.937	322.976	1.15788	0.211486	8.22954	0.698084	1	0.156092
																											ENSOCUG00000002994	149.197	139.469	158.925	1.1395	0.188403	7.218	0.7771	1	0.109523
																											ENSOCUG00000002996	8748.98	7480.59	10017.4	1.33912	0.421282	13.0796	0.316402	1	0.499761
																											ENSOCUG00000002997	988.546	934.342	1042.75	1.11603	0.158372	9.94699	0.72963	1	0.136897
																											ENSOCUG00000002998	214.254	261.382	167.127	0.639399	-0.645211	7.70741	0.268314	1	0.571357
																											ENSOCUG00000002999	4.95155	6.82713	3.07596	0.450549	-1.15024	2.19616	0.792389	1	0.101062
																											ENSOCUG00000003000	2.48828	2.92591	2.05064	0.700855	-0.512813	1.29248	1	1	0
																											ENSOCUG00000003001	14.9297	17.5555	12.3038	0.700855	-0.512813	3.87744	0.801064	1	0.096333
																											ENSOCUG00000003002	1079.84	1112.82	1046.85	0.940718	-0.0881661	10.0759	0.847259	1	0.0719839
																											ENSOCUG00000003003	1108.5	1074.79	1142.21	1.06273	0.0877748	10.1137	0.847571	1	0.071824
																											ENSOCUG00000003005	2.02563	0.975305	3.07596	3.15385	1.65711	0.792481	0.890414	1	0.0504081
																											ENSOCUG00000003006	239.8	324.777	154.823	0.476707	-1.06882	7.80889	0.060697	1	1.21683
																											ENSOCUG00000003008	45.1266	59.4936	30.7596	0.517024	-0.951697	5.41881	0.349956	1	0.455986
																											ENSOCUG00000003009	439.575	431.085	448.065	1.03939	0.0557367	8.7797	0.916175	1	0.0380216
																											ENSOCUG00000003010	1179.94	847.54	1512.35	1.7844	0.835437	10.1449	0.064389	1	1.19119
																											ENSOCUG00000003012	288.603	240.9	336.305	1.39603	0.481335	8.15296	0.376402	1	0.424348
																											ENSOCUG00000003013	13.9043	17.5555	10.2532	0.584046	-0.775847	3.74593	0.697154	1	0.156671
																											ENSOCUG00000003015	774.38	689.541	859.219	1.24607	0.31739	9.58819	0.497041	1	0.303608
																											ENSOCUG00000003016	134.867	138.493	131.241	0.947635	-0.0775973	7.07487	0.918072	1	0.0371234
																											ENSOCUG00000003017	11.341	17.5555	5.1266	0.292023	-1.77585	3.24593	0.414177	1	0.382814
																											ENSOCUG00000003018	460.556	452.541	468.571	1.03542	0.0502191	8.84702	0.924194	1	0.0342366
																											ENSOCUG00000003020	208.453	207.74	209.165	1.00686	0.00986551	7.70357	0.995932	1	0.00177025
																											ENSOCUG00000003023	297.831	360.863	234.798	0.650658	-0.620028	8.18529	0.251296	1	0.599815
																											ENSOCUG00000003025	685.602	792.923	578.281	0.729303	-0.45541	9.40333	0.336045	1	0.473602
																											ENSOCUG00000003026	406.164	414.505	397.824	0.959759	-0.0592564	8.66562	0.91212	1	0.039948
																											ENSOCUG00000003027	233.898	235.048	232.748	0.990212	-0.0141911	7.86972	0.988624	1	0.00496863
																											ENSOCUG00000003028	68.5589	65.3454	71.7724	1.09835	0.135344	6.09769	0.889033	1	0.0510823
																											ENSOCUG00000003029	130.853	155.073	106.633	0.687631	-0.540293	7.00666	0.421801	1	0.374892
																											ENSOCUG00000003030	8.82776	15.6049	2.05064	0.13141	-2.92785	2.5	0.27775	1	0.556345
																											ENSOCUG00000003031	148.972	188.234	109.709	0.582835	-0.77884	7.16696	0.226937	1	0.644095
																											ENSOCUG00000003032	54.8546	39.9875	69.7218	1.74359	0.802061	5.72251	0.390061	1	0.408868
																											ENSOCUG00000003033	22.0319	20.4814	23.5824	1.1514	0.203394	4.45794	0.918388	1	0.0369739
																											ENSOCUG00000003035	138.031	155.073	120.988	0.780197	-0.35809	7.09776	0.591017	1	0.2284
																											ENSOCUG00000003036	66.5208	84.8515	48.1901	0.567934	-0.816205	5.99877	0.342656	1	0.465142
																											ENSOCUG00000003038	75.0485	72.1726	77.9244	1.0797	0.110624	6.22869	0.908091	1	0.0418705
																											ENSOCUG00000003039	12.0288	10.7284	13.3292	1.24242	0.313158	3.57994	0.916433	1	0.0378991
																											ENSOCUG00000003040	177.055	212.616	141.494	0.66549	-0.58751	7.43835	0.338105	1	0.470948
																											ENSOCUG00000003042	871.747	950.922	792.573	0.833478	-0.262784	9.76179	0.569616	1	0.244418
																											ENSOCUG00000003043	33.3479	39.0122	27.6837	0.709615	-0.494891	5.03841	0.68495	1	0.164341
																											ENSOCUG00000003044	6.97718	7.80244	6.15192	0.788462	-0.342888	2.79248	0.95729	1	0.0189565
																											ENSOCUG00000003045	925.552	951.898	899.206	0.944646	-0.0821545	9.85359	0.859855	1	0.0655745
																											ENSOCUG00000003046	52.4289	54.6171	50.2407	0.919872	-0.120495	5.71103	0.918778	1	0.0367896
																											ENSOCUG00000003047	107.459	127.765	87.1522	0.68213	-0.551882	6.72141	0.442722	1	0.353869
																											ENSOCUG00000003048	30.8847	35.111	26.6583	0.759259	-0.397335	4.93518	0.760694	1	0.11879
																											ENSOCUG00000003050	234.286	239.925	228.646	0.952991	-0.0694648	7.87171	0.910299	1	0.0408161
																											ENSOCUG00000003052	5.58925	1.95061	9.22788	4.73077	2.24207	2.08496	0.537131	1	0.26992
																											ENSOCUG00000003053	33.3479	39.0122	27.6837	0.709615	-0.494891	5.03841	0.68495	1	0.164341
																											ENSOCUG00000003055	280.138	311.122	249.153	0.80082	-0.32045	8.12111	0.560106	1	0.25173
																											ENSOCUG00000003057	714.961	647.602	782.32	1.20802	0.27265	9.47529	0.563344	1	0.249226
																											ENSOCUG00000003059	208.065	162.876	253.254	1.55489	0.636813	7.66604	0.277951	1	0.556031
																											ENSOCUG00000003060	33.2354	23.4073	43.0635	1.83974	0.879505	4.98864	0.456367	1	0.340686
																											ENSOCUG00000003061	7.61488	2.92591	12.3038	4.20513	2.07215	2.58496	0.468133	1	0.329631
																											ENSOCUG00000003062	77.1991	68.2713	86.1269	1.26154	0.335184	6.2608	0.686715	1	0.163224
																											ENSOCUG00000003063	467.534	380.369	554.698	1.45832	0.544304	8.84341	0.274604	1	0.561293
																											ENSOCUG00000003064	146.133	158.975	133.292	0.838446	-0.254211	7.18555	0.700676	1	0.154483
																											ENSOCUG00000003068	22777.5	21274.3	24280.6	1.14131	0.190692	14.4722	0.64751	1	0.188753
																											ENSOCUG00000003071	92.1163	106.308	77.9244	0.733004	-0.448107	6.50806	0.557905	1	0.25344
																											ENSOCUG00000003073	273.611	285.764	261.457	0.914938	-0.128254	8.09456	0.820886	1	0.0857169
																											ENSOCUG00000003079	11.0785	7.80244	14.3545	1.83974	0.879505	3.40368	0.701679	1	0.153862
																											ENSOCUG00000003080	14.6421	8.77774	20.5064	2.33618	1.22415	3.74593	0.508271	1	0.293905
																											ENSOCUG00000003082	21.2316	11.7037	30.7596	2.62821	1.39408	4.24593	0.34843	1	0.457884
																											ENSOCUG00000003083	18.5183	17.5555	19.4811	1.10969	0.150152	4.20893	0.960694	1	0.0174147
																											ENSOCUG00000003084	1.00031	0.975305	1.02532	1.05128	0.0721498	1.28137e-15	1	1	0
																											ENSOCUG00000003095	8.51516	7.80244	9.22788	1.18269	0.242075	3.08496	0.974059	1	0.0114146
																											ENSOCUG00000003096	329.828	292.591	367.065	1.25453	0.327147	8.35632	0.537854	1	0.269335
																											ENSOCUG00000003097	723.739	785.12	662.357	0.843638	-0.245305	9.49412	0.602892	1	0.21976
																											ENSOCUG00000003098	151.335	156.049	146.621	0.939583	-0.089907	7.2409	0.898289	1	0.0465839
																											ENSOCUG00000003101	1319.7	1295.2	1344.2	1.03782	0.0535623	10.3657	0.906024	1	0.0428601
																											ENSOCUG00000003102	753.048	681.738	824.358	1.2092	0.274053	9.5501	0.559045	1	0.252554
																											ENSOCUG00000003103	103.095	118.012	88.1776	0.747192	-0.420449	6.67256	0.566974	1	0.246437
																											ENSOCUG00000003105	89.3404	94.6046	84.0763	0.888713	-0.170211	6.47873	0.835969	1	0.0778096
																											ENSOCUG00000003106	202.876	145.32	260.431	1.79212	0.841666	7.60393	0.154604	1	0.81078
																											ENSOCUG00000003108	23.9575	25.3579	22.5571	0.889546	-0.168858	4.57994	0.933146	1	0.0300506
																											ENSOCUG00000003110	41.2254	51.6912	30.7596	0.595065	-0.74888	5.31741	0.483136	1	0.31593
																											ENSOCUG00000003112	36.2988	43.8887	28.709	0.654131	-0.612348	5.1496	0.59383	1	0.226338
																											ENSOCUG00000003116	25.4204	28.2838	22.5571	0.797524	-0.3264	4.65871	0.830575	1	0.0806214
																											ENSOCUG00000003117	2.00063	1.95061	2.05064	1.05128	0.0721498	1	1	1	0
																											ENSOCUG00000003118	3.97624	4.87652	3.07596	0.630769	-0.664816	1.95345	0.935409	1	0.0289985
																											ENSOCUG00000003119	270.835	314.048	227.621	0.724797	-0.464351	8.06267	0.400256	1	0.397662
																											ENSOCUG00000003120	3.92623	6.82713	1.02532	0.150183	-2.73521	1.40368	0.589775	1	0.229314
																											ENSOCUG00000003122	1446.64	1502.94	1390.33	0.925074	-0.11236	10.4974	0.801085	1	0.0963216
																											ENSOCUG00000003124	377.305	340.381	414.229	1.21696	0.283278	8.55265	0.584706	1	0.233062
																											ENSOCUG00000003125	42.9134	45.8393	39.9875	0.87234	-0.197037	5.42	0.86917	1	0.0608955
																											ENSOCUG00000003126	223.657	214.567	232.748	1.08473	0.117339	7.80395	0.845189	1	0.0730459
																											ENSOCUG00000003128	49.2779	57.543	41.0128	0.712734	-0.488565	5.60229	0.624665	1	0.204353
																											ENSOCUG00000003129	56.2051	67.296	45.1141	0.670383	-0.576943	5.78398	0.535962	1	0.270866
																											ENSOCUG00000003131	72.3101	78.9997	65.6205	0.830643	-0.2677	6.16993	0.758003	1	0.120329
																											ENSOCUG00000003132	9.39043	13.6543	5.1266	0.375458	-1.41328	3.06464	0.568365	1	0.245372
																											ENSOCUG00000003133	126.54	143.37	109.709	0.765219	-0.386056	6.97057	0.572823	1	0.241979
																											ENSOCUG00000003134	94.5045	113.135	75.8737	0.670645	-0.576378	6.53372	0.443873	1	0.352741
																											ENSOCUG00000003136	392.11	442.788	341.432	0.771095	-0.37502	8.60296	0.465207	1	0.332354
																											ENSOCUG00000003137	59.1185	53.6418	64.5952	1.2042	0.26807	5.87932	0.779074	1	0.108421
																											ENSOCUG00000003139	1447.56	1426.87	1468.26	1.02901	0.0412515	10.4993	0.92742	1	0.0327236
																											ENSOCUG00000003140	135.805	81.9256	189.684	2.31532	1.21121	6.96185	0.0691333	1	1.16031
																											ENSOCUG00000003141	534.029	586.158	481.901	0.822134	-0.282554	9.05387	0.564019	1	0.248706
																											ENSOCUG00000003142	24.4451	26.3332	22.5571	0.8566	-0.223306	4.60716	0.898092	1	0.0466793
																											ENSOCUG00000003143	116.099	130.691	101.507	0.776693	-0.364583	6.84772	0.605853	1	0.217633
																											ENSOCUG00000003144	103.057	99.4811	106.633	1.0719	0.100164	6.68643	0.903128	1	0.0442508
																											ENSOCUG00000003145	160.538	117.037	204.039	1.74338	0.801884	7.27176	0.203188	1	0.692102
																											ENSOCUG00000003146	1.97562	2.92591	1.02532	0.350427	-1.51281	0.792481	0.911891	1	0.0400571
																											ENSOCUG00000003148	52.3164	39.0122	65.6205	1.68205	0.750222	5.66096	0.431764	1	0.364754
																											ENSOCUG00000003150	475.324	496.43	454.217	0.914967	-0.128209	8.89134	0.799455	1	0.0972061
																											ENSOCUG00000003152	1695.72	1665.82	1725.61	1.03589	0.050877	10.7275	0.909085	1	0.0413956
																											ENSOCUG00000003153	119.112	113.135	125.089	1.10566	0.144906	6.89436	0.844164	1	0.0735732
																											ENSOCUG00000003155	1366.65	1243.51	1489.79	1.19805	0.260687	10.4106	0.558512	1	0.252967
																											ENSOCUG00000003156	10.8534	16.5802	5.1266	0.309201	-1.69338	3.2047	0.448902	1	0.347848
																											ENSOCUG00000003157	84.6515	97.5305	71.7724	0.735897	-0.442423	6.38657	0.575838	1	0.239699
																											ENSOCUG00000003160	1383.22	1337.14	1429.3	1.06892	0.0961518	10.433	0.830071	1	0.0808847
																											ENSOCUG00000003161	12.904	16.5802	9.22788	0.556561	-0.845388	3.62869	0.683936	1	0.164985
																											ENSOCUG00000003163	1346.87	1495.14	1198.6	0.801663	-0.318933	10.3866	0.474416	1	0.323841
																											ENSOCUG00000003168	2256.57	2265.63	2247.5	0.991998	-0.0115916	11.1399	0.979799	1	0.008863
																											ENSOCUG00000003169	928.64	851.441	1005.84	1.18134	0.240421	9.85397	0.600846	1	0.221237
																											ENSOCUG00000003170	1027.37	919.712	1135.03	1.23411	0.303475	9.99678	0.504807	1	0.296875
																											ENSOCUG00000003173	177.368	180.431	174.304	0.966043	-0.0498407	7.47039	0.944761	1	0.0246781
																											ENSOCUG00000003174	871.235	1030.9	711.572	0.690246	-0.534818	9.74228	0.246787	1	0.607677
																											ENSOCUG00000003176	291.216	318.925	263.507	0.826237	-0.275372	8.17939	0.614344	1	0.211588
																											ENSOCUG00000003178	1405.94	1510.75	1301.13	0.86125	-0.215495	10.4533	0.628239	1	0.201875
																											ENSOCUG00000003179	870.935	802.676	939.194	1.17008	0.226605	9.76198	0.624184	1	0.204688
																											ENSOCUG00000003181	85.4642	85.8268	85.1016	0.99155	-0.0122424	6.41724	1	1	0
																											ENSOCUG00000003182	32.2101	23.4073	41.0128	1.75214	0.809115	4.95345	0.501316	1	0.299889
																											ENSOCUG00000003185	483.776	486.677	480.875	0.988079	-0.0173021	8.91817	0.976757	1	0.0102136
																											ENSOCUG00000003186	123.914	125.814	122.013	0.969787	-0.0442597	6.95302	0.961033	1	0.0172615
																											ENSOCUG00000003187	76.9616	57.543	96.3801	1.67492	0.744096	6.21862	0.358773	1	0.445181
																											ENSOCUG00000003188	1574.32	1701.91	1446.73	0.850062	-0.234359	10.6158	0.595799	1	0.2249
																											ENSOCUG00000003189	86.4145	88.7527	84.0763	0.947309	-0.0780928	6.43267	0.934994	1	0.0291911
																											ENSOCUG00000003190	1304.45	1330.32	1278.57	0.961106	-0.0572324	10.3489	0.899591	1	0.045955
																											ENSOCUG00000003191	8.41513	11.7037	5.1266	0.438034	-1.19088	2.95345	0.661871	1	0.179227
																											ENSOCUG00000003196	1214.95	1281.55	1148.36	0.89607	-0.158317	10.2445	0.725218	1	0.139531
																											ENSOCUG00000003198	42.2257	52.6665	31.7849	0.603514	-0.728541	5.35454	0.490473	1	0.309385
																											ENSOCUG00000003199	813.404	987.008	639.8	0.648221	-0.625442	9.6342	0.178773	1	0.747698
																											ENSOCUG00000003201	355.511	370.616	340.406	0.918489	-0.122666	8.47245	0.818322	1	0.0870757
																											ENSOCUG00000003202	783.995	814.38	753.611	0.92538	-0.111882	9.61362	0.812379	1	0.0902411
																											ENSOCUG00000003203	98.7184	128.74	68.6965	0.533605	-0.906155	6.55524	0.219868	1	0.657837
																											ENSOCUG00000003204	130.228	139.469	120.988	0.867491	-0.205079	7.02126	0.767979	1	0.114651
																											ENSOCUG00000003208	361.551	355.011	368.09	1.03684	0.0521952	8.49782	0.925376	1	0.0336817
																											ENSOCUG00000003211	71.2723	59.4936	83.051	1.39596	0.481262	6.13529	0.569168	1	0.24476
																											ENSOCUG00000003213	323.789	348.184	299.394	0.859872	-0.217806	8.3348	0.684738	1	0.164476
																											ENSOCUG00000003215	13.4667	14.6296	12.3038	0.841026	-0.249778	3.74593	0.93458	1	0.0293836
																											ENSOCUG00000003217	217.968	136.543	299.394	2.19267	1.13269	7.65955	0.0521783	1	1.28251
																											ENSOCUG00000003220	5.97687	6.82713	5.1266	0.750916	-0.413277	2.56464	0.951121	1	0.0217642
																											ENSOCUG00000003221	76.3614	80.9503	71.7724	0.886623	-0.173607	6.25216	0.844235	1	0.0735368
																											ENSOCUG00000003226	387.071	339.406	434.736	1.28087	0.357127	8.58543	0.487833	1	0.311729
																											ENSOCUG00000003227	203.226	211.641	194.811	0.920477	-0.119546	7.6657	0.84662	1	0.0723116
																											ENSOCUG00000003228	50.0406	47.7899	52.2913	1.09419	0.129865	5.64357	0.913343	1	0.0393663
																											ENSOCUG00000003231	385.483	381.344	389.622	1.02171	0.0309806	8.59044	0.957324	1	0.0189411
																											ENSOCUG00000003233	295.492	312.098	278.887	0.89359	-0.162315	8.2047	0.768456	1	0.114381
																											ENSOCUG00000003234	686.977	619.319	754.636	1.21849	0.285099	9.41709	0.547423	1	0.261677
																											ENSOCUG00000003236	94.0544	90.7033	97.4054	1.07389	0.102847	6.55451	0.904615	1	0.0435361
																											ENSOCUG00000003237	532.879	591.035	474.723	0.803207	-0.316156	9.04902	0.518409	1	0.285327
																											ENSOCUG00000003238	11.341	17.5555	5.1266	0.292023	-1.77585	3.24593	0.414177	1	0.382814
																											ENSOCUG00000003240	324.089	296.493	351.685	1.18615	0.246287	8.335	0.645293	1	0.190243
																											ENSOCUG00000003245	17771.5	16531.4	19011.5	1.15002	0.201661	14.1138	0.629168	1	0.201233
																											ENSOCUG00000003248	11.6161	6.82713	16.4051	2.40293	1.26479	3.40368	0.5553	1	0.255473
																											ENSOCUG00000003249	590.134	657.355	522.913	0.79548	-0.330102	9.19548	0.493999	1	0.306274
																											ENSOCUG00000003250	227.546	242.851	212.241	0.873957	-0.194365	7.82674	0.739709	1	0.130939
																											ENSOCUG00000003251	1.51297	0.975305	2.05064	2.10256	1.07215	0.5	0.991961	1	0.00350522
																											ENSOCUG00000003252	60.4689	80.9503	39.9875	0.493976	-1.01749	5.83022	0.25538	1	0.592813
																											ENSOCUG00000003254	28.7715	17.5555	39.9875	2.27778	1.18763	4.72766	0.34766	1	0.458845
																											ENSOCUG00000003255	1214.17	1092.34	1335.99	1.22305	0.290488	10.2385	0.517786	1	0.28585
																											ENSOCUG00000003256	23.1822	15.6049	30.7596	1.97115	0.97904	4.45345	0.492018	1	0.308019
																											ENSOCUG00000003257	57.5555	54.6171	60.4939	1.1076	0.147438	5.845	0.889047	1	0.0510752
																											ENSOCUG00000003258	573.854	532.516	615.192	1.15526	0.208211	9.16079	0.668472	1	0.174917
																											ENSOCUG00000003260	63.2198	53.6418	72.7978	1.35711	0.440537	5.96555	0.622112	1	0.206132
																											ENSOCUG00000003262	268.071	281.863	254.279	0.902138	-0.14858	8.06456	0.792957	1	0.10075
																											ENSOCUG00000003263	8.80275	16.5802	1.02532	0.0618401	-4.01531	2.04373	0.174677	1	0.757765
																											ENSOCUG00000003264	7.95249	9.75305	6.15192	0.630769	-0.664816	2.95345	0.837805	1	0.0768569
																											ENSOCUG00000003265	259.281	204.814	313.748	1.53187	0.615292	7.98582	0.269068	1	0.570139
																											ENSOCUG00000003266	616.718	700.269	533.167	0.761374	-0.393322	9.2551	0.412137	1	0.384959
																											ENSOCUG00000003267	1274.32	1245.46	1303.18	1.04634	0.0653553	10.3151	0.885366	1	0.052877
																											ENSOCUG00000003271	306.683	335.505	277.862	0.82819	-0.271966	8.25421	0.614853	1	0.211228
																											ENSOCUG00000003273	395.724	361.838	429.609	1.1873	0.247681	8.62304	0.630375	1	0.200401
																											ENSOCUG00000003274	16.005	15.6049	16.4051	1.05128	0.0721498	4	1	1	0
																											ENSOCUG00000003275	76.649	89.728	63.5699	0.708473	-0.497216	6.23888	0.544244	1	0.264206
																											ENSOCUG00000003276	5.51422	4.87652	6.15192	1.26154	0.335184	2.45345	0.979971	1	0.00878673
																											ENSOCUG00000003277	123.664	175.555	71.7724	0.408832	-1.29042	6.81057	0.0608597	1	1.21567
																											ENSOCUG00000003280	3.5136	2.92591	4.10128	1.40171	0.487187	1.79248	0.985048	1	0.00654242
																											ENSOCUG00000003282	618.643	665.158	572.129	0.86014	-0.217357	9.26887	0.651442	1	0.186124
																											ENSOCUG00000003283	146.683	137.518	155.849	1.1333	0.180526	7.19374	0.78789	1	0.103534
																											ENSOCUG00000003284	33.548	31.2098	35.8862	1.14984	0.201433	5.06464	0.885949	1	0.0525915
																											ENSOCUG00000003285	343.17	432.06	254.279	0.588528	-0.764817	8.37268	0.145963	1	0.835758
																											ENSOCUG00000003287	1372.93	1318.61	1427.25	1.08239	0.114214	10.4219	0.798552	1	0.0976967
																											ENSOCUG00000003290	149.147	181.407	116.887	0.644334	-0.634119	7.18602	0.325194	1	0.487857
																											ENSOCUG00000003291	491.891	470.097	513.686	1.09272	0.127927	8.94078	0.798743	1	0.097593
																											ENSOCUG00000003292	348.559	401.826	295.292	0.734877	-0.444426	8.42821	0.396543	1	0.40171
																											ENSOCUG00000003294	1120.64	1101.12	1140.16	1.03545	0.0502611	10.1299	0.913237	1	0.0394165
																											ENSOCUG00000003296	426.346	427.184	425.508	0.996078	-0.00566975	8.73588	0.996367	1	0.0015807
																											ENSOCUG00000003298	2296.54	2606.01	1987.07	0.762494	-0.391202	11.152	0.366891	1	0.435463
																											ENSOCUG00000003299	24.7327	35.111	14.3545	0.408832	-1.29042	4.48864	0.34683	1	0.459883
																											ENSOCUG00000003302	327.502	263.332	391.672	1.48737	0.572763	8.32712	0.279868	1	0.553046
																											ENSOCUG00000003303	91.041	108.259	73.8231	0.681913	-0.552341	6.48217	0.469736	1	0.328146
																											ENSOCUG00000003307	107.584	82.9009	132.266	1.59548	0.673986	6.71031	0.346792	1	0.459931
																											ENSOCUG00000003309	38.9372	40.9628	36.9115	0.901099	-0.150243	5.28112	0.912896	1	0.0395788
																											ENSOCUG00000003313	3114.62	3450.63	2778.62	0.80525	-0.312491	11.5964	0.466146	1	0.331478
																											ENSOCUG00000003314	20.2438	30.2344	10.2532	0.339123	-1.56012	4.13806	0.308869	1	0.510225
																											ENSOCUG00000003318	7.0522	4.87652	9.22788	1.89231	0.920147	2.74593	0.779153	1	0.108377
																											ENSOCUG00000003319	102.294	149.222	55.3673	0.371041	-1.43035	6.50614	0.0520921	1	1.28323
																											ENSOCUG00000003320	57.468	78.0244	36.9115	0.473077	-1.07985	5.74593	0.237656	1	0.624052
																											ENSOCUG00000003322	359.837	321.851	397.824	1.23605	0.30574	8.48312	0.558438	1	0.253025
																											ENSOCUG00000003323	93.5918	128.74	58.4433	0.453963	-1.13935	6.43864	0.131245	1	0.881918
																											ENSOCUG00000003324	116.011	114.111	117.912	1.03331	0.0472751	6.85793	0.9592	1	0.0180908
																											ENSOCUG00000003325	346.321	429.134	263.507	0.614044	-0.703585	8.39349	0.180058	1	0.744588
																											ENSOCUG00000003326	48.9403	50.7159	47.1647	0.92998	-0.104728	5.612	0.936073	1	0.0286905
																											ENSOCUG00000003327	632.748	554.948	710.547	1.28038	0.356576	9.2945	0.455793	1	0.341232
																											ENSOCUG00000003328	145.445	205.789	85.1016	0.413537	-1.27391	7.04807	0.0514826	1	1.28834
[truncated: 21,150 more rows]

## Sheet: GO Enrichment Analysis
Differential Expressed Gene: GO Annotation				#		Differential Expressed Gene: GO Enrichment Analysis															#
				#																	#
2C 2-Fold up vs. 3C		3C 2-Fold up vs. 2C		#		GOSlim	Description	GO	2C Up		3C Up		DE gene		Genome		Significant		Genes		#
ID	GO	ID	GO	#					Count	Percent	Count	Percent	Count	Percent	Count	Percent	P-value	-LOG10(P-value)	2C	3C	#
ENSOCUG00000000087	GO:0016020;GO:0016021;GO:0005575;	ENSOCUG00000000049	GO:0001867;GO:0003824;GO:0004252;GO:0004252;GO:0005509;GO:0005576;GO:0005615;GO:0006508;GO:0006956;GO:0008233;GO:0008236;GO:0016787;GO:0002376;GO:0003674;GO:0005575;GO:0005576;GO:0008150;GO:0008233;GO:0043167;	#		Biological Process	biological process	GO:0008150	174	0.137549	141	0.160775	315	0.147059	12105	0.180502	1.19376e-05	4.92308	ENSOCUG00000024308;ENSOCUG00000022112;ENSOCUG00000012132;ENSOCUG00000023898;ENSOCUG00000004733;ENSOCUG00000012868;ENSOCUG00000000431;ENSOCUG00000000104;ENSOCUG00000013813;ENSOCUG00000000407;ENSOCUG00000011482;ENSOCUG00000023790;ENSOCUG00000027156;ENSOCUG00000002336;ENSOCUG00000003792;ENSOCUG00000027099;ENSOCUG00000012042;ENSOCUG00000004826;ENSOCUG00000017338;ENSOCUG00000007616;ENSOCUG00000007999;…	ENSOCUG00000005808;ENSOCUG00000012972;ENSOCUG00000002483;ENSOCUG00000014705;ENSOCUG00000016573;ENSOCUG00000001353;ENSOCUG00000010762;ENSOCUG00000000049;ENSOCUG00000009566;ENSOCUG00000007622;ENSOCUG00000026988;ENSOCUG00000022888;ENSOCUG00000003521;ENSOCUG00000016986;ENSOCUG00000029244;ENSOCUG00000002086;ENSOCUG00000007403;ENSOCUG00000014298;ENSOCUG00000016751;ENSOCUG00000002392;ENSOCUG00000013450;…	#
ENSOCUG00000000104	GO:0003677;GO:0003700;GO:0005515;GO:0005515;GO:0005515;GO:0005634;GO:0006355;GO:0030529;GO:0043565;GO:0001071;GO:0003674;GO:0003677;GO:0005575;GO:0005622;GO:0005623;GO:0005634;GO:0008150;GO:0043226;	ENSOCUG00000000136	GO:0005634;GO:0005737;GO:0006356;GO:0006357;GO:0042060;GO:0046872;GO:0050679;GO:0051276;GO:0003674;GO:0043167;	#			aging	GO:0007568	3	0.00237154	4	0.004561	7	0.00326797	85	0.00126746	0.00273456	2.56311	ENSOCUG00000016068;ENSOCUG00000004958;ENSOCUG00000002703	ENSOCUG00000024446;ENSOCUG00000011781;ENSOCUG00000008992;ENSOCUG00000029244	#
ENSOCUG00000000109	-	ENSOCUG00000000145	GO:0000122;GO:0000122;GO:0000977;GO:0000977;GO:0000979;GO:0000979;GO:0001078;GO:0001078;GO:0003700;GO:0005515;GO:0005634;GO:0006351;GO:0006355;GO:0007623;GO:0010628;GO:0010628;GO:0043565;GO:0071353;GO:0071353;GO:0001071;GO:0003674;GO:0003677;GO:0005575;GO:0005622;GO:0005623;GO:0005634;GO:0008150;GO:0009058;GO:0034641;GO:0043226;	#			anatomical structure development	GO:0048856	86	0.0679842	56	0.063854	142	0.0662932	3074	0.0458375	1.56716e-18	17.8049	ENSOCUG00000016624;ENSOCUG00000004687;ENSOCUG00000000407;ENSOCUG00000010244;ENSOCUG00000003792;ENSOCUG00000015020;ENSOCUG00000007978;ENSOCUG00000011482;ENSOCUG00000004221;ENSOCUG00000014657;ENSOCUG00000007616;ENSOCUG00000002613;ENSOCUG00000004826;ENSOCUG00000004847;ENSOCUG00000005279;ENSOCUG00000012042;ENSOCUG00000011745;ENSOCUG00000024399;ENSOCUG00000002759;ENSOCUG00000003056;ENSOCUG00000004340;…	ENSOCUG00000023396;ENSOCUG00000025898;ENSOCUG00000013450;ENSOCUG00000011097;ENSOCUG00000009993;ENSOCUG00000016751;ENSOCUG00000014298;ENSOCUG00000008071;ENSOCUG00000014358;ENSOCUG00000000605;ENSOCUG00000008992;ENSOCUG00000029663;ENSOCUG00000002622;ENSOCUG00000007403;ENSOCUG00000029244;ENSOCUG00000029569;ENSOCUG00000002480;ENSOCUG00000011985;ENSOCUG00000001407;ENSOCUG00000015877;ENSOCUG00000001555;…	#
ENSOCUG00000000148	GO:0005506;GO:0005829;GO:0005829;GO:0017172;GO:0046439;GO:0047800;GO:0055114;GO:0003674;GO:0005575;GO:0005622;GO:0005623;GO:0005737;GO:0005829;GO:0006520;GO:0006790;GO:0008150;GO:0016491;GO:0043167;GO:0044281;	ENSOCUG00000000195	GO:0005515;GO:0070062;	#			anatomical structure formation involved in morphogenesis	GO:0048646	17	0.0134387	10	0.0114025	27	0.012605	735	0.0109598	0.00714098	2.14624	ENSOCUG00000005371;ENSOCUG00000010244;ENSOCUG00000000266;ENSOCUG00000008220;ENSOCUG00000015320;ENSOCUG00000016624;ENSOCUG00000009244;ENSOCUG00000001212;ENSOCUG00000003246;ENSOCUG00000009050;ENSOCUG00000024465;ENSOCUG00000004826;ENSOCUG00000008579;ENSOCUG00000003792;ENSOCUG00000016068;ENSOCUG00000013367;ENSOCUG00000007978	ENSOCUG00000011985;ENSOCUG00000005107;ENSOCUG00000013290;ENSOCUG00000007622;ENSOCUG00000011097;ENSOCUG00000007069;ENSOCUG00000026988;ENSOCUG00000016751;ENSOCUG00000006444;ENSOCUG00000015634	#
ENSOCUG00000000266	GO:0002062;GO:0002062;GO:0005102;GO:0005515;GO:0005576;GO:0005578;GO:0007275;GO:0008584;GO:0008584;GO:0009267;GO:0016055;GO:0021871;GO:0021871;GO:0021871;GO:0060070;GO:0060070;GO:0060492;GO:0060492;GO:0060638;GO:0060638;GO:0071425;GO:0071425;GO:0090190;GO:0090190;GO:0090263;GO:0090263;GO:0000003;GO:0002376;GO:0003674;GO:0005575;GO:0005576;GO:0005578;GO:0007165;GO:0007267;GO:0008150;GO:0008283;GO:…	ENSOCUG00000000197	GO:0000166;GO:0004396;GO:0004396;GO:0005524;GO:0005739;GO:0005741;GO:0005741;GO:0005975;GO:0006006;GO:0006096;GO:0008637;GO:0008637;GO:0016020;GO:0016301;GO:0016310;GO:0016740;GO:0016773;GO:0046324;GO:0046835;GO:0046835;GO:0003674;GO:0005575;GO:0005622;GO:0005623;GO:0005737;GO:0005739;GO:0005975;GO:0006091;GO:0008150;GO:0009056;GO:0016301;GO:0043167;GO:0043226;	#			biosynthetic process	GO:0009058	59	0.0466403	38	0.0433295	97	0.0452848	3820	0.0569614	0.0721198	1.14195	ENSOCUG00000001212;ENSOCUG00000003246;ENSOCUG00000004687;ENSOCUG00000012868;ENSOCUG00000010244;ENSOCUG00000003768;ENSOCUG00000003499;ENSOCUG00000013813;ENSOCUG00000002848;ENSOCUG00000000104;ENSOCUG00000002132;ENSOCUG00000000407;ENSOCUG00000004221;ENSOCUG00000016277;ENSOCUG00000014689;ENSOCUG00000003091;ENSOCUG00000025109;ENSOCUG00000002703;ENSOCUG00000003792;ENSOCUG00000022950;ENSOCUG00000027838;…	ENSOCUG00000024676;ENSOCUG00000009215;ENSOCUG00000016061;ENSOCUG00000022791;ENSOCUG00000015177;ENSOCUG00000023673;ENSOCUG00000029357;ENSOCUG00000027806;ENSOCUG00000017744;ENSOCUG00000013290;ENSOCUG00000023877;ENSOCUG00000016751;ENSOCUG00000003451;ENSOCUG00000014358;ENSOCUG00000007403;ENSOCUG00000029663;ENSOCUG00000002086;ENSOCUG00000029569;ENSOCUG00000027648;ENSOCUG00000002392;ENSOCUG00000011097;…	#
ENSOCUG00000000370	GO:0004222;GO:0005578;GO:0006508;GO:0008237;GO:0008270;GO:0031012;GO:0003674;GO:0005575;GO:0005576;GO:0005578;GO:0008150;GO:0008233;GO:0043167;	ENSOCUG00000000297	-	#			carbohydrate metabolic process	GO:0005975	9	0.00711462	7	0.00798176	16	0.00746965	581	0.0086635	0.215645	0.66626	ENSOCUG00000006698;ENSOCUG00000012868;ENSOCUG00000023599;ENSOCUG00000017424;ENSOCUG00000005721;ENSOCUG00000004958;ENSOCUG00000014689;ENSOCUG00000012132;ENSOCUG00000021771	ENSOCUG00000000197;ENSOCUG00000022791;ENSOCUG00000011985;ENSOCUG00000016751;ENSOCUG00000014705;ENSOCUG00000026988;ENSOCUG00000009934	#
ENSOCUG00000000380	-	ENSOCUG00000000338	GO:0005890;GO:0006813;GO:0006814;GO:0005575;GO:0005623;GO:0005886;GO:0006810;GO:0008150;GO:0043234;GO:0001671;GO:0005391;GO:0005515;GO:0005737;GO:0005737;GO:0005886;GO:0005890;GO:0006813;GO:0006814;GO:0006883;GO:0010107;GO:0030007;GO:0032781;GO:0036376;GO:0050821;GO:0051117;GO:0070062;GO:0072659;GO:0086009;GO:1901018;GO:1903278;GO:1903288;GO:1903291;GO:0005575;GO:0005622;GO:0005623;GO:0005737;GO:…	#			catabolic process	GO:0009056	24	0.0189723	20	0.022805	44	0.0205415	1972	0.0294052	0.490906	0.309002	ENSOCUG00000009279;ENSOCUG00000013813;ENSOCUG00000007620;ENSOCUG00000010061;ENSOCUG00000001030;ENSOCUG00000006357;ENSOCUG00000011340;ENSOCUG00000010244;ENSOCUG00000010198;ENSOCUG00000016624;ENSOCUG00000024308;ENSOCUG00000001212;ENSOCUG00000016506;ENSOCUG00000022112;ENSOCUG00000024196;ENSOCUG00000021580;ENSOCUG00000000778;ENSOCUG00000006698;ENSOCUG00000001992;ENSOCUG00000010654;ENSOCUG00000011533;…	ENSOCUG00000002483;ENSOCUG00000014705;ENSOCUG00000009644;ENSOCUG00000008632;ENSOCUG00000015634;ENSOCUG00000001555;ENSOCUG00000000197;ENSOCUG00000011497;ENSOCUG00000013891;ENSOCUG00000001230;ENSOCUG00000026988;ENSOCUG00000023877;ENSOCUG00000000338;ENSOCUG00000008071;ENSOCUG00000011858;ENSOCUG00000001353;ENSOCUG00000015801;ENSOCUG00000013039;ENSOCUG00000009566;ENSOCUG00000021262	#
ENSOCUG00000000407	GO:0002052;GO:0002052;GO:0004167;GO:0004167;GO:0005737;GO:0005737;GO:0005829;GO:0005829;GO:0006583;GO:0006583;GO:0008152;GO:0016491;GO:0021847;GO:0021847;GO:0042438;GO:0042438;GO:0042470;GO:0042470;GO:0043473;GO:0043473;GO:0046872;GO:0048066;GO:0048066;GO:0048468;GO:0048468;GO:0055114;GO:0003674;GO:0005575;GO:0005622;GO:0005623;GO:0005737;GO:0005829;GO:0006520;GO:0008150;GO:0008283;GO:0009058;GO:…	ENSOCUG00000000435	GO:0000166;GO:0003824;GO:0004672;GO:0004674;GO:0004713;GO:0005515;GO:0005516;GO:0005516;GO:0005524;GO:0005737;GO:0005737;GO:0006468;GO:0016772;GO:0035556;GO:0035556;GO:0042802;GO:0042802;GO:0043276;GO:0043276;GO:1900119;GO:2001242;GO:0003674;GO:0005575;GO:0005622;GO:0005623;GO:0005737;GO:0006464;GO:0007165;GO:0008150;GO:0008219;GO:0016301;GO:0043167;	#			cell adhesion	GO:0007155	29	0.0229249	10	0.0114025	39	0.0182073	583	0.00869332	9.43845e-10	9.0251	ENSOCUG00000013367;ENSOCUG00000016068;ENSOCUG00000014857;ENSOCUG00000007978;ENSOCUG00000011482;ENSOCUG00000004958;ENSOCUG00000017726;ENSOCUG00000003792;ENSOCUG00000002038;ENSOCUG00000005899;ENSOCUG00000017338;ENSOCUG00000017019;ENSOCUG00000006698;ENSOCUG00000005279;ENSOCUG00000015449;ENSOCUG00000024465;ENSOCUG00000023599;ENSOCUG00000002613;ENSOCUG00000003056;ENSOCUG00000016506;ENSOCUG00000003246;…	ENSOCUG00000026791;ENSOCUG00000011842;ENSOCUG00000008632;ENSOCUG00000015957;ENSOCUG00000007056;ENSOCUG00000007622;ENSOCUG00000009566;ENSOCUG00000016385;ENSOCUG00000009993;ENSOCUG00000002356	#
ENSOCUG00000000431	GO:0005215;GO:0005515;GO:0005737;GO:0005737;GO:0006810;GO:0008289;GO:0003674;GO:0005575;GO:0005622;GO:0005623;GO:0005737;GO:0006810;GO:0008150;GO:0008289;	ENSOCUG00000000539	GO:0006810;GO:0006811;GO:0006813;GO:0008076;GO:0015269;GO:0015269;GO:0016020;GO:0016021;GO:0016021;GO:0071805;GO:0003674;GO:0005575;GO:0006810;GO:0008150;GO:0022857;GO:0055085;	#			cell cycle	GO:0007049	21	0.0166008	11	0.0125428	32	0.0149393	834	0.0124361	0.00184638	2.73368	ENSOCUG00000016624;ENSOCUG00000005133;ENSOCUG00000011745;ENSOCUG00000023898;ENSOCUG00000001212;ENSOCUG00000010340;ENSOCUG00000028094;ENSOCUG00000007620;ENSOCUG00000001030;ENSOCUG00000011340;ENSOCUG00000004340;ENSOCUG00000003768;ENSOCUG00000002703;ENSOCUG00000003792;ENSOCUG00000016277;ENSOCUG00000014689;ENSOCUG00000015790;ENSOCUG00000001454;ENSOCUG00000005279;ENSOCUG00000005899;ENSOCUG00000014289	ENSOCUG00000011097;ENSOCUG00000007069;ENSOCUG00000003521;ENSOCUG00000017069;ENSOCUG00000001407;ENSOCUG00000010652;ENSOCUG00000024446;ENSOCUG00000003451;ENSOCUG00000011858;ENSOCUG00000014358;ENSOCUG00000016394	#
ENSOCUG00000000664	GO:0005515;GO:0005856;GO:0005575;GO:0005622;GO:0005623;GO:0005856;GO:0043226;GO:0005856;GO:0005575;GO:0005622;GO:0005623;GO:0005856;GO:0043226;	ENSOCUG00000000551	GO:0003810;GO:0018149;GO:0046872;GO:0003674;GO:0006464;GO:0008150;GO:0016746;GO:0043167;	#			cell death	GO:0008219	26	0.0205534	15	0.0171038	41	0.019141	1022	0.0152394	0.000178883	3.74743	ENSOCUG00000016068;ENSOCUG00000014689;ENSOCUG00000001992;ENSOCUG00000002902;ENSOCUG00000029247;ENSOCUG00000003792;ENSOCUG00000006731;ENSOCUG00000001454;ENSOCUG00000002038;ENSOCUG00000004826;ENSOCUG00000014289;ENSOCUG00000009543;ENSOCUG00000005279;ENSOCUG00000006698;ENSOCUG00000011746;ENSOCUG00000003214;ENSOCUG00000005094;ENSOCUG00000001212;ENSOCUG00000003056;ENSOCUG00000016942;ENSOCUG00000001618;…	ENSOCUG00000011985;ENSOCUG00000009566;ENSOCUG00000015877;ENSOCUG00000000197;ENSOCUG00000023877;ENSOCUG00000008560;ENSOCUG00000011097;ENSOCUG00000009934;ENSOCUG00000001230;ENSOCUG00000011858;ENSOCUG00000012972;ENSOCUG00000000435;ENSOCUG00000008632;ENSOCUG00000002086;ENSOCUG00000010762	#
ENSOCUG00000000696	GO:0005515;GO:0003674;	ENSOCUG00000000605	GO:0005515;GO:0005515;GO:0005776;GO:0008104;GO:0016023;GO:0016234;GO:0017157;GO:0021549;GO:0021979;GO:0047496;GO:0048011;GO:0050769;GO:1902513;GO:1902857;	#			cell differentiation	GO:0030154	53	0.0418972	45	0.0513113	98	0.0457516	2110	0.031463	9.40728e-13	12.0265	ENSOCUG00000002703;ENSOCUG00000005708;ENSOCUG00000014689;ENSOCUG00000007978;ENSOCUG00000015138;ENSOCUG00000004221;ENSOCUG00000016277;ENSOCUG00000002613;ENSOCUG00000014657;ENSOCUG00000017424;ENSOCUG00000004847;ENSOCUG00000005279;ENSOCUG00000017019;ENSOCUG00000002038;ENSOCUG00000006731;ENSOCUG00000016771;ENSOCUG00000004687;ENSOCUG00000016624;ENSOCUG00000026228;ENSOCUG00000003246;ENSOCUG00000001212;…	ENSOCUG00000002356;ENSOCUG00000003436;ENSOCUG00000027230;ENSOCUG00000007622;ENSOCUG00000010762;ENSOCUG00000027444;ENSOCUG00000001353;ENSOCUG00000006444;ENSOCUG00000015552;ENSOCUG00000015301;ENSOCUG00000023877;ENSOCUG00000001230;ENSOCUG00000013290;ENSOCUG00000015634;ENSOCUG00000009395;ENSOCUG00000009056;ENSOCUG00000006737;ENSOCUG00000016394;ENSOCUG00000012972;ENSOCUG00000027806;ENSOCUG00000009993;…	#
ENSOCUG00000000721	GO:0003824;GO:0004252;GO:0005509;GO:0005515;GO:0006508;GO:0003674;GO:0008150;GO:0008233;GO:0043167;	ENSOCUG00000000793	GO:0005509;GO:0005515;GO:0005634;GO:0005634;GO:0005737;GO:0005737;GO:0005886;GO:0005886;GO:0008284;GO:0008284;GO:0010922;GO:0010922;GO:0042307;GO:0042307;GO:0045944;GO:0045944;GO:0070886;GO:0070886;GO:0071277;GO:0071277;GO:0003674;GO:0005575;GO:0005622;GO:0005623;GO:0005634;GO:0005737;GO:0005886;GO:0008150;GO:0043167;GO:0043226;	#			cell division	GO:0051301	17	0.0134387	4	0.004561	21	0.00980392	401	0.00597945	0.000253715	3.59565	ENSOCUG00000007620;ENSOCUG00000028094;ENSOCUG00000000407;ENSOCUG00000001030;ENSOCUG00000011340;ENSOCUG00000003768;ENSOCUG00000004340;ENSOCUG00000016624;ENSOCUG00000005133;ENSOCUG00000011745;ENSOCUG00000023898;ENSOCUG00000015790;ENSOCUG00000014289;ENSOCUG00000015312;ENSOCUG00000005279;ENSOCUG00000016277;ENSOCUG00000014689	ENSOCUG00000011097;ENSOCUG00000003521;ENSOCUG00000007069;ENSOCUG00000010652	#
ENSOCUG00000000778	GO:0005515;GO:0017112;GO:0017112;GO:0032313;GO:0032851;GO:0003674;GO:0008150;	ENSOCUG00000000968	GO:0005198;GO:0005515;GO:0005515;GO:0005622;GO:0005622;GO:0005737;GO:0005856;GO:0005856;GO:0005882;GO:0005882;GO:0005916;GO:0005916;GO:0008092;GO:0008092;GO:0030018;GO:0030018;GO:0030018;GO:0031594;GO:0031594;GO:0042383;GO:0042383;GO:0042802;GO:0042802;GO:0043292;GO:0043292;GO:0070062;GO:0003674;GO:0005198;GO:0005575;GO:0005622;GO:0005623;GO:0005737;GO:0005856;GO:0005886;GO:0008092;GO:0043226;GO:…	#			cell junction organization	GO:0034330	4	0.00316206	2	0.0022805	6	0.00280112	112	0.00167007	0.0378504	1.42193	ENSOCUG00000014625;ENSOCUG00000023599;ENSOCUG00000015449;ENSOCUG00000005279	ENSOCUG00000014421;ENSOCUG00000015957	#
ENSOCUG00000000999	GO:0005515;GO:0005789;GO:0005794;GO:0032438;GO:0032585;GO:0042438;GO:0042470;GO:0042470;	ENSOCUG00000001230	GO:0001933;GO:0001937;GO:0003824;GO:0004854;GO:0004855;GO:0005506;GO:0005515;GO:0005615;GO:0006919;GO:0007595;GO:0008762;GO:0009055;GO:0009115;GO:0010629;GO:0016491;GO:0016491;GO:0016614;GO:0030856;GO:0042803;GO:0043546;GO:0043546;GO:0045602;GO:0046872;GO:0050660;GO:0051536;GO:0051537;GO:0051537;GO:0051898;GO:0055114;GO:0055114;GO:1900745;GO:1900747;GO:2000379;GO:2001213;GO:0003674;GO:0008150;GO:…	#			cell morphogenesis	GO:0000902	18	0.0142292	12	0.013683	30	0.0140056	716	0.0106765	0.000655815	3.18322	ENSOCUG00000011745;ENSOCUG00000016624;ENSOCUG00000001618;ENSOCUG00000003768;ENSOCUG00000002662;ENSOCUG00000014625;ENSOCUG00000007978;ENSOCUG00000005708;ENSOCUG00000013412;ENSOCUG00000005899;ENSOCUG00000004847;ENSOCUG00000005279;ENSOCUG00000017019;ENSOCUG00000025112;ENSOCUG00000012042;ENSOCUG00000001454;ENSOCUG00000006731;ENSOCUG00000009050	ENSOCUG00000015957;ENSOCUG00000001353;ENSOCUG00000007403;ENSOCUG00000015552;ENSOCUG00000003436;ENSOCUG00000007069;ENSOCUG00000003521;ENSOCUG00000015301;ENSOCUG00000011097;ENSOCUG00000009993;ENSOCUG00000011985;ENSOCUG00000027230	#
ENSOCUG00000001030	GO:0000166;GO:0000287;GO:0000287;GO:0003924;GO:0005515;GO:0005515;GO:0005525;GO:0005622;GO:0005634;GO:0005634;GO:0006184;GO:0007067;GO:0007067;GO:0007165;GO:0007264;GO:0009898;GO:0009898;GO:0015031;GO:0016020;GO:0019003;GO:0019003;GO:0030496;GO:0030496;GO:0051233;GO:0051233;GO:0051276;GO:0051276;GO:0051310;GO:0072686;GO:0072686;GO:0003674;GO:0005575;GO:0005622;GO:0005623;GO:0005634;GO:0005856;GO:…	ENSOCUG00000001353	GO:0002931;GO:0002931;GO:0004197;GO:0004221;GO:0004221;GO:0004843;GO:0005515;GO:0005622;GO:0005654;GO:0005737;GO:0005737;GO:0005829;GO:0005829;GO:0005886;GO:0006511;GO:0007409;GO:0007409;GO:0007412;GO:0007412;GO:0007628;GO:0007628;GO:0008242;GO:0008283;GO:0008283;GO:0016579;GO:0019896;GO:0019896;GO:0030424;GO:0030424;GO:0031694;GO:0042755;GO:0042755;GO:0043025;GO:0043025;GO:0043130;GO:0043407;GO:…	#			cell motility	GO:0048870	27	0.0213439	10	0.0114025	37	0.0172736	781	0.0116458	1.23387e-05	4.90873	ENSOCUG00000023599;ENSOCUG00000009050;ENSOCUG00000002613;ENSOCUG00000006698;ENSOCUG00000005279;ENSOCUG00000002038;ENSOCUG00000010654;ENSOCUG00000003792;ENSOCUG00000017726;ENSOCUG00000005708;ENSOCUG00000024272;ENSOCUG00000013412;ENSOCUG00000007978;ENSOCUG00000014689;ENSOCUG00000016068;ENSOCUG00000022536;ENSOCUG00000013813;ENSOCUG00000011982;ENSOCUG00000002848;ENSOCUG00000010244;ENSOCUG00000006357;…	ENSOCUG00000015957;ENSOCUG00000007403;ENSOCUG00000011781;ENSOCUG00000008632;ENSOCUG00000009056;ENSOCUG00000011097;ENSOCUG00000002562;ENSOCUG00000009566;ENSOCUG00000007622;ENSOCUG00000001407	#
ENSOCUG00000001046	GO:0001503;GO:0001649;GO:0005576;GO:0007155;GO:0016020;GO:0030198;GO:0071363;GO:0005575;GO:0005576;GO:0007155;GO:0008150;	ENSOCUG00000001407	GO:0002092;GO:0002092;GO:0004871;GO:0004871;GO:0005515;GO:0005515;GO:0005634;GO:0005634;GO:0005737;GO:0005737;GO:0005737;GO:0005886;GO:0005886;GO:0005886;GO:0005923;GO:0005923;GO:0007165;GO:0007165;GO:0008285;GO:0014069;GO:0019902;GO:0019902;GO:0030159;GO:0030159;GO:0030165;GO:0030336;GO:0031697;GO:0031697;GO:0032516;GO:0032516;GO:0032926;GO:0032926;GO:0036057;GO:0043113;GO:0045202;GO:0046332;GO:…	#			cell proliferation	GO:0008283	40	0.0316206	16	0.018244	56	0.0261438	1069	0.0159402	2.01711e-09	8.69527	ENSOCUG00000010340;ENSOCUG00000002848;ENSOCUG00000000407;ENSOCUG00000003768;ENSOCUG00000010244;ENSOCUG00000016624;ENSOCUG00000004687;ENSOCUG00000009244;ENSOCUG00000001212;ENSOCUG00000003246;ENSOCUG00000026228;ENSOCUG00000003214;ENSOCUG00000008117;ENSOCUG00000016771;ENSOCUG00000001454;ENSOCUG00000006731;ENSOCUG00000005899;ENSOCUG00000005279;ENSOCUG00000002703;ENSOCUG00000005708;ENSOCUG00000003792;…	ENSOCUG00000024446;ENSOCUG00000000136;ENSOCUG00000007069;ENSOCUG00000001230;ENSOCUG00000000793;ENSOCUG00000001407;ENSOCUG00000015877;ENSOCUG00000001353;ENSOCUG00000002086;ENSOCUG00000007403;ENSOCUG00000014358;ENSOCUG00000006444;ENSOCUG00000002562;ENSOCUG00000008560;ENSOCUG00000011097;ENSOCUG00000007622	#
ENSOCUG00000001212	GO:0000980;GO:0000980;GO:0001102;GO:0001102;GO:0001525;GO:0001525;GO:0001774;GO:0001774;GO:0001889;GO:0001889;GO:0001938;GO:0001938;GO:0003151;GO:0003151;GO:0003677;GO:0003677;GO:0003700;GO:0003713;GO:0003713;GO:0005100;GO:0005100;GO:0005515;GO:0005515;GO:0005634;GO:0005634;GO:0005634;GO:0005654;GO:0005667;GO:0005667;GO:0005719;GO:0005719;GO:0006355;GO:0006355;GO:0007179;GO:0007179;GO:0007184;GO:…	ENSOCUG00000001412	GO:0001558;GO:0005520;GO:0005576;GO:0051536;GO:0070062;GO:0003674;GO:0005575;GO:0005576;GO:0008150;	#			cell wall organization or biogenesis	GO:0071554	0	0	1	0.00114025	1	0.000466853	14	0.000208759	0.268238	0.571479	-	ENSOCUG00000013891	#
ENSOCUG00000001235	GO:0004222;GO:0005515;GO:0005515;GO:0006508;GO:0006509;GO:0006509;GO:0007507;GO:0007507;GO:0008237;GO:0008270;GO:0003674;GO:0008150;GO:0008233;GO:0043167;GO:0048856;	ENSOCUG00000001448	GO:0005515;GO:0003674;	#			cell-cell signaling	GO:0007267	14	0.0110672	9	0.0102623	23	0.0107376	512	0.00763461	0.00110827	2.95535	ENSOCUG00000016277;ENSOCUG00000005620;ENSOCUG00000002926;ENSOCUG00000000266;ENSOCUG00000001618;ENSOCUG00000011340;ENSOCUG00000006731;ENSOCUG00000006698;ENSOCUG00000003768;ENSOCUG00000002848;ENSOCUG00000002244;ENSOCUG00000009794;ENSOCUG00000005094;ENSOCUG00000009050	ENSOCUG00000007069;ENSOCUG00000013292;ENSOCUG00000005827;ENSOCUG00000010156;ENSOCUG00000002356;ENSOCUG00000015301;ENSOCUG00000011097;ENSOCUG00000013290;ENSOCUG00000011985	#
ENSOCUG00000001454	GO:0000086;GO:0000086;GO:0005198;GO:0005622;GO:0005622;GO:0005737;GO:0005737;GO:0005737;GO:0005882;GO:0005882;GO:0007399;GO:0007399;GO:0032091;GO:0032091;GO:0043086;GO:0043086;GO:0043524;GO:0043524;GO:0045111;GO:0045111;GO:0048858;GO:0048858;GO:0072089;GO:0072089;GO:0000902;GO:0003674;GO:0005198;GO:0005575;GO:0005622;GO:0005623;GO:0005737;GO:0005856;GO:0007049;GO:0008150;GO:0008283;GO:0043226;GO:…	ENSOCUG00000001555	GO:0001822;GO:0001822;GO:0002446;GO:0002446;GO:0003084;GO:0003084;GO:0005515;GO:0005737;GO:0005886;GO:0006508;GO:0007283;GO:0007283;GO:0008217;GO:0008217;GO:0008233;GO:0008233;GO:0008237;GO:0008237;GO:0008241;GO:0008241;GO:0016020;GO:0042447;GO:0042447;GO:0060047;GO:0060047;GO:0000003;GO:0002376;GO:0003013;GO:0003674;GO:0005575;GO:0008150;GO:0008233;GO:0009056;GO:0048856;	#			cellular component assembly	GO:0022607	18	0.0142292	19	0.0216648	37	0.0172736	1280	0.0190865	0.0570597	1.24367	ENSOCUG00000009050;ENSOCUG00000023599;ENSOCUG00000015449;ENSOCUG00000006698;ENSOCUG00000004847;ENSOCUG00000008229;ENSOCUG00000006731;ENSOCUG00000027219;ENSOCUG00000010654;ENSOCUG00000010077;ENSOCUG00000005620;ENSOCUG00000002848;ENSOCUG00000011982;ENSOCUG00000009279;ENSOCUG00000011745;ENSOCUG00000016624;ENSOCUG00000026228;ENSOCUG00000022112	ENSOCUG00000017233;ENSOCUG00000015957;ENSOCUG00000015634;ENSOCUG00000005924;ENSOCUG00000009644;ENSOCUG00000012972;ENSOCUG00000023535;ENSOCUG00000003521;ENSOCUG00000001407;ENSOCUG00000025918;ENSOCUG00000011985;ENSOCUG00000007056;ENSOCUG00000029244;ENSOCUG00000002086;ENSOCUG00000014422;ENSOCUG00000027003;ENSOCUG00000021801;ENSOCUG00000015993;ENSOCUG00000013450	#
ENSOCUG00000001525	GO:0004222;GO:0005576;GO:0005578;GO:0006508;GO:0008233;GO:0008237;GO:0008270;GO:0031012;GO:0003674;GO:0005575;GO:0005576;GO:0005578;GO:0008150;GO:0008233;GO:0043167;	ENSOCUG00000001627	-	#			cellular nitrogen compound metabolic process	GO:0034641	50	0.0395257	40	0.04561	90	0.0420168	4356	0.0649538	0.771892	0.112444	ENSOCUG00000012339;ENSOCUG00000001723;ENSOCUG00000004422;ENSOCUG00000002673;ENSOCUG00000011533;ENSOCUG00000009050;ENSOCUG00000021580;ENSOCUG00000021506;ENSOCUG00000011746;ENSOCUG00000008229;ENSOCUG00000006698;ENSOCUG00000014289;ENSOCUG00000023019;ENSOCUG00000001618;ENSOCUG00000001616;ENSOCUG00000016984;ENSOCUG00000024399;ENSOCUG00000008439;ENSOCUG00000016506;ENSOCUG00000002759;ENSOCUG00000004030;…	ENSOCUG00000015634;ENSOCUG00000023535;ENSOCUG00000027806;ENSOCUG00000002483;ENSOCUG00000023877;ENSOCUG00000001230;ENSOCUG00000003513;ENSOCUG00000013290;ENSOCUG00000027444;ENSOCUG00000015801;ENSOCUG00000027003;ENSOCUG00000015177;ENSOCUG00000016061;ENSOCUG00000024446;ENSOCUG00000009644;ENSOCUG00000017233;ENSOCUG00000000136;ENSOCUG00000000793;ENSOCUG00000000338;ENSOCUG00000008688;ENSOCUG00000026988;…	#
ENSOCUG00000001573	GO:0004721;GO:0004725;GO:0004725;GO:0005515;GO:0006470;GO:0006470;GO:0008013;GO:0016020;GO:0016311;GO:0016787;GO:0016790;GO:0016791;GO:0035335;GO:0045294;GO:0045295;GO:0045296;GO:0051393;GO:0070097;GO:0003674;GO:0005575;GO:0006464;GO:0008150;GO:0016791;	ENSOCUG00000001822	GO:0000166;GO:0003777;GO:0003777;GO:0005515;GO:0005524;GO:0005871;GO:0005871;GO:0005874;GO:0005930;GO:0007017;GO:0007017;GO:0007018;GO:0008017;GO:0008152;GO:0015630;GO:0016192;GO:0016192;GO:0030992;GO:0031503;GO:0031503;GO:0032391;GO:0036064;GO:1990075;GO:0003674;GO:0005575;GO:0005622;GO:0005623;GO:0005856;GO:0006810;GO:0008092;GO:0008150;GO:0016192;GO:0043167;GO:0043226;GO:0043234;GO:0000166;GO:…	#			cellular protein modification process	GO:0006464	35	0.027668	27	0.0307868	62	0.0289449	2094	0.0312244	0.0106012	1.97465	ENSOCUG00000002848;ENSOCUG00000002658;ENSOCUG00000011340;ENSOCUG00000003768;ENSOCUG00000009244;ENSOCUG00000021436;ENSOCUG00000001212;ENSOCUG00000001573;ENSOCUG00000007999;ENSOCUG00000014657;ENSOCUG00000022947;ENSOCUG00000002038;ENSOCUG00000006731;ENSOCUG00000005279;ENSOCUG00000001992;ENSOCUG00000023790;ENSOCUG00000003792;ENSOCUG00000011452;ENSOCUG00000016277;ENSOCUG00000007978;ENSOCUG00000014689;…	ENSOCUG00000017069;ENSOCUG00000022791;ENSOCUG00000000551;ENSOCUG00000003436;ENSOCUG00000011097;ENSOCUG00000008560;ENSOCUG00000021262;ENSOCUG00000012631;ENSOCUG00000011858;ENSOCUG00000003451;ENSOCUG00000016751;ENSOCUG00000006444;ENSOCUG00000001353;ENSOCUG00000007056;ENSOCUG00000009215;ENSOCUG00000007403;ENSOCUG00000026281;ENSOCUG00000002086;ENSOCUG00000005107;ENSOCUG00000001230;ENSOCUG00000009934;…	#
ENSOCUG00000001599	GO:0005515;GO:0005515;GO:0005615;GO:0045499;GO:0050919;GO:0003674;	ENSOCUG00000002086	GO:0001933;GO:0001933;GO:0005507;GO:0005507;GO:0005515;GO:0005515;GO:0005783;GO:0005783;GO:0005794;GO:0005794;GO:0005886;GO:0005886;GO:0006979;GO:0006979;GO:0008017;GO:0008017;GO:0009986;GO:0015631;GO:0015631;GO:0016020;GO:0016020;GO:0031225;GO:0032689;GO:0032689;GO:0032700;GO:0032700;GO:0032703;GO:0032703;GO:0032880;GO:0042802;GO:0042802;GO:0042802;GO:0043066;GO:0043066;GO:0043433;GO:0043433;GO:…	#			chromosome organization	GO:0051276	7	0.0055336	7	0.00798176	14	0.00653595	596	0.00888717	0.443155	0.353444	ENSOCUG00000001030;ENSOCUG00000003768;ENSOCUG00000014289;ENSOCUG00000008229;ENSOCUG00000004340;ENSOCUG00000002658;ENSOCUG00000011745	ENSOCUG00000017233;ENSOCUG00000027003;ENSOCUG00000014422;ENSOCUG00000025918;ENSOCUG00000005107;ENSOCUG00000023535;ENSOCUG00000000136	#
ENSOCUG00000001616	GO:0001822;GO:0001822;GO:0002001;GO:0004175;GO:0004252;GO:0004252;GO:0005515;GO:0005615;GO:0005794;GO:0006465;GO:0006508;GO:0007507;GO:0007566;GO:0008233;GO:0008233;GO:0008236;GO:0009952;GO:0009952;GO:0016485;GO:0016486;GO:0016486;GO:0016787;GO:0019058;GO:0019058;GO:0030141;GO:0030323;GO:0035108;GO:0042089;GO:0042277;GO:0043043;GO:0043043;GO:0048566;GO:0048566;GO:0048706;GO:0048706;GO:0003674;GO:…	ENSOCUG00000002342	GO:0005515;GO:0005622;GO:0044822;GO:0003674;	#			chromosome segregation	GO:0007059	2	0.00158103	0	0	2	0.000933707	124	0.00184901	0.761798	0.11816	ENSOCUG00000004340;ENSOCUG00000001030	-	#
ENSOCUG00000001618	GO:0000187;GO:0000187;GO:0000902;GO:0000902;GO:0001889;GO:0001889;GO:0003824;GO:0004252;GO:0005515;GO:0006508;GO:0008083;GO:0008283;GO:0008283;GO:0014068;GO:0014068;GO:0016020;GO:0030335;GO:0030335;GO:0035729;GO:0035729;GO:0042056;GO:0042056;GO:0042802;GO:0042802;GO:0043154;GO:0043154;GO:0048012;GO:0048012;GO:0048012;GO:0050731;GO:0050731;GO:0050918;GO:0050918;GO:0051450;GO:0051450;GO:0060326;GO:…	ENSOCUG00000002356	GO:0005515;GO:0007156;GO:0016358;GO:0030424;GO:0030425;GO:0050807;GO:0060077;GO:0098632;GO:0003674;	#			circulatory system process	GO:0003013	8	0.00632411	7	0.00798176	15	0.0070028	216	0.00322085	9.73425e-05	4.0117	ENSOCUG00000005721;ENSOCUG00000001616;ENSOCUG00000005708;ENSOCUG00000005279;ENSOCUG00000016771;ENSOCUG00000008858;ENSOCUG00000014625;ENSOCUG00000009794	ENSOCUG00000003436;ENSOCUG00000015301;ENSOCUG00000015634;ENSOCUG00000024446;ENSOCUG00000014358;ENSOCUG00000001555;ENSOCUG00000005107	#
ENSOCUG00000001723	GO:0003676;GO:0003677;GO:0003700;GO:0003779;GO:0005634;GO:0006355;GO:0007010;GO:0008270;GO:0043565;GO:0046872;GO:0001071;GO:0003674;GO:0003677;GO:0005575;GO:0005622;GO:0005623;GO:0005634;GO:0007010;GO:0008092;GO:0008150;GO:0043167;GO:0043226;	ENSOCUG00000002392	GO:0003735;GO:0005622;GO:0005840;GO:0006412;GO:0003674;GO:0003735;GO:0005198;GO:0005575;GO:0005622;GO:0005623;GO:0005737;GO:0005840;GO:0006412;GO:0008150;GO:0009058;GO:0043226;	#			cofactor metabolic process	GO:0051186	0	0	1	0.00114025	1	0.000466853	154	0.00229635	0.968115	0.014073	-	ENSOCUG00000009679	#
ENSOCUG00000001992	GO:0005515;GO:0005737;GO:0042787;GO:0042981;GO:0003674;	ENSOCUG00000002407	GO:0001527;GO:0031012;GO:0043206;GO:0005575;GO:0005576;GO:0005578;	#			cytoskeleton organization	GO:0007010	12	0.00948617	11	0.0125428	23	0.0107376	658	0.00981167	0.0209653	1.6785	ENSOCUG00000023898;ENSOCUG00000001723;ENSOCUG00000016624;ENSOCUG00000005527;ENSOCUG00000024272;ENSOCUG00000013412;ENSOCUG00000006321;ENSOCUG00000004340;ENSOCUG00000015790;ENSOCUG00000011982;ENSOCUG00000015449;ENSOCUG00000028094	ENSOCUG00000021801;ENSOCUG00000029569;ENSOCUG00000015957;ENSOCUG00000029244;ENSOCUG00000015634;ENSOCUG00000008632;ENSOCUG00000005808;ENSOCUG00000008992;ENSOCUG00000011781;ENSOCUG00000029234;ENSOCUG00000009644	#
ENSOCUG00000002038	GO:0001764;GO:0005515;GO:0005539;GO:0005576;GO:0008201;GO:0010811;GO:0010976;GO:0016049;GO:0019800;GO:0030198;GO:0031012;GO:0043524;GO:0003674;	ENSOCUG00000002435	GO:0005344;GO:0005506;GO:0005833;GO:0006810;GO:0015671;GO:0019825;GO:0020037;GO:0046872;GO:0003674;GO:0005575;GO:0005622;GO:0005623;GO:0005737;GO:0005829;GO:0006810;GO:0008150;GO:0043167;GO:0043234;	#			developmental maturation	GO:0021700	7	0.0055336	7	0.00798176	14	0.00653595	163	0.00243055	1.62555e-05	4.789	ENSOCUG00000009050;ENSOCUG00000016771;ENSOCUG00000011340;ENSOCUG00000016942;ENSOCUG00000005620;ENSOCUG00000005279;ENSOCUG00000014689	ENSOCUG00000023877;ENSOCUG00000024446;ENSOCUG00000015957;ENSOCUG00000003436;ENSOCUG00000011985;ENSOCUG00000008071;ENSOCUG00000014358	#
ENSOCUG00000002132	GO:0000785;GO:0000785;GO:0003677;GO:0005515;GO:0005634;GO:0005654;GO:0006351;GO:0044822;GO:0072357;GO:0072357;GO:0003674;GO:0003677;GO:0005575;GO:0005622;GO:0005623;GO:0005634;GO:0005694;GO:0008150;GO:0009058;GO:0034641;GO:0043226;GO:0043234;	ENSOCUG00000002480	GO:0002376;GO:0002504;GO:0005515;GO:0005764;GO:0005886;GO:0006955;GO:0009897;GO:0016020;GO:0016021;GO:0019882;GO:0019886;GO:0034341;GO:0042605;GO:0042613;GO:0045582;GO:0048002;GO:0002376;GO:0003674;GO:0005575;GO:0005622;GO:0005623;GO:0005737;GO:0005764;GO:0005773;GO:0005886;GO:0006950;GO:0008150;GO:0043226;GO:0043234;GO:0002376;GO:0002504;GO:0005515;GO:0005515;GO:0005764;GO:0005764;GO:0005886;GO:…	#			embryo development	GO:0009790	17	0.0134387	6	0.00684151	23	0.0107376	793	0.0118247	0.111653	0.95213	ENSOCUG00000012339;ENSOCUG00000006462;ENSOCUG00000013367;ENSOCUG00000006698;ENSOCUG00000005279;ENSOCUG00000024465;ENSOCUG00000016942;ENSOCUG00000003246;ENSOCUG00000015320;ENSOCUG00000016624;ENSOCUG00000000266;ENSOCUG00000001616;ENSOCUG00000010244;ENSOCUG00000003768;ENSOCUG00000004340;ENSOCUG00000007620;ENSOCUG00000014625	ENSOCUG00000005107;ENSOCUG00000013290;ENSOCUG00000011097;ENSOCUG00000024446;ENSOCUG00000024273;ENSOCUG00000007069	#
ENSOCUG00000002203	GO:0001503;GO:0001503;GO:0005783;GO:0005783;GO:0007612;GO:0007612;GO:0008083;GO:0030282;GO:0030282;GO:0003674;GO:0005575;GO:0005622;GO:0005623;GO:0005737;GO:0005783;GO:0008150;GO:0043226;GO:0048856;GO:0050877;	ENSOCUG00000002483	GO:0000166;GO:0005525;GO:0005622;GO:0006184;GO:0007165;GO:0007264;GO:0015031;GO:0016020;GO:0003674;GO:0005575;GO:0005622;GO:0005623;GO:0006810;GO:0007165;GO:0008150;GO:0009056;GO:0034641;GO:0034655;GO:0043167;GO:0044281;GO:0000166;GO:0005525;GO:0005622;GO:0006184;GO:0007165;GO:0007264;GO:0015031;GO:0016020;GO:0003674;GO:0005575;GO:0005622;GO:0005623;GO:0006810;GO:0007165;GO:0008150;GO:0009056;GO:…	#			extracellular matrix organization	GO:0030198	11	0.00869565	5	0.00570125	16	0.00746965	146	0.00217706	1.55059e-07	6.8095	ENSOCUG00000022093;ENSOCUG00000002038;ENSOCUG00000001046;ENSOCUG00000004590;ENSOCUG00000006698;ENSOCUG00000005279;ENSOCUG00000015020;ENSOCUG00000024308;ENSOCUG00000013367;ENSOCUG00000011482;ENSOCUG00000003246	ENSOCUG00000002407;ENSOCUG00000008071;ENSOCUG00000013450;ENSOCUG00000024273;ENSOCUG00000007056	#
ENSOCUG00000002244	GO:0005515;GO:0005515;GO:0005543;GO:0005543;GO:0005737;GO:0007612;GO:0007612;GO:0008021;GO:0008021;GO:0031256;GO:0031256;GO:0048488;GO:0048488;GO:0003674;GO:0005575;GO:0005622;GO:0005623;GO:0005737;GO:0005886;GO:0006810;GO:0007267;GO:0008150;GO:0008289;GO:0016023;GO:0016192;GO:0043167;GO:0043226;GO:0050877;	ENSOCUG00000002485	GO:0002344;GO:0002344;GO:0002376;GO:0002504;GO:0002579;GO:0002579;GO:0002827;GO:0002827;GO:0005515;GO:0005515;GO:0005622;GO:0005622;GO:0005769;GO:0005769;GO:0005771;GO:0005771;GO:0005794;GO:0005794;GO:0005886;GO:0005886;GO:0006955;GO:0006955;GO:0008134;GO:0008134;GO:0009897;GO:0009897;GO:0015643;GO:0015643;GO:0016020;GO:0016021;GO:0016021;GO:0019882;GO:0019882;GO:0019886;GO:0019886;GO:0031625;GO:…	#			generation of precursor metabolites and energy	GO:0006091	2	0.00158103	2	0.0022805	4	0.00186741	177	0.00263931	0.550156	0.259514	ENSOCUG00000014689;ENSOCUG00000005721	ENSOCUG00000000197;ENSOCUG00000009934	#
ENSOCUG00000002336	GO:0003953;GO:0008152;GO:0070062;GO:0003674;GO:0008150;GO:0016798;	ENSOCUG00000002562	GO:0005515;GO:0005518;GO:0005615;GO:0005737;GO:0008285;GO:0030336;GO:0003674;	#			growth	GO:0040007	21	0.0166008	9	0.0102623	30	0.0140056	591	0.00881261	2.33222e-05	4.63223	ENSOCUG00000004590;ENSOCUG00000010244;ENSOCUG00000014625;ENSOCUG00000010340;ENSOCUG00000004460;ENSOCUG00000008220;ENSOCUG00000016984;ENSOCUG00000002038;ENSOCUG00000006731;ENSOCUG00000016771;ENSOCUG00000006698;ENSOCUG00000004847;ENSOCUG00000005279;ENSOCUG00000005094;ENSOCUG00000007978;ENSOCUG00000012339;ENSOCUG00000014689;ENSOCUG00000005721;ENSOCUG00000002902;ENSOCUG00000005708;ENSOCUG00000003792	ENSOCUG00000011985;ENSOCUG00000005107;ENSOCUG00000011097;ENSOCUG00000001412;ENSOCUG00000007069;ENSOCUG00000003436;ENSOCUG00000014358;ENSOCUG00000015552;ENSOCUG00000029569	#
ENSOCUG00000002470	GO:0003676;GO:0005634;GO:0005737;GO:0019221;GO:0046872;GO:0003674;GO:0043167;	ENSOCUG00000002622	GO:0002244;GO:0005198;GO:0005622;GO:0005622;GO:0005882;GO:0045095;GO:0070062;GO:0003674;GO:0005198;GO:0005575;GO:0005622;GO:0005623;GO:0005856;GO:0043226;GO:0043234;	#			helicase activity	GO:0004386	0	0	0	0	0	0	148	0.00220688	1	0	-	-	#
ENSOCUG00000002553	-	ENSOCUG00000002771	-	#			homeostatic process	GO:0042592	17	0.0134387	12	0.013683	29	0.0135387	868	0.0129431	0.0181097	1.74209	ENSOCUG00000006698;ENSOCUG00000005279;ENSOCUG00000004826;ENSOCUG00000014289;ENSOCUG00000009543;ENSOCUG00000027219;ENSOCUG00000016771;ENSOCUG00000021580;ENSOCUG00000014689;ENSOCUG00000005620;ENSOCUG00000005721;ENSOCUG00000005708;ENSOCUG00000007620;ENSOCUG00000008858;ENSOCUG00000002848;ENSOCUG00000009279;ENSOCUG00000003056	ENSOCUG00000023877;ENSOCUG00000015301;ENSOCUG00000000338;ENSOCUG00000011097;ENSOCUG00000011985;ENSOCUG00000015877;ENSOCUG00000029663;ENSOCUG00000024446;ENSOCUG00000015801;ENSOCUG00000015957;ENSOCUG00000009056;ENSOCUG00000004635	#
ENSOCUG00000002613	GO:0001649;GO:0005509;GO:0005515;GO:0005540;GO:0005576;GO:0005578;GO:0005615;GO:0005615;GO:0007155;GO:0007507;GO:0008347;GO:0008347;GO:0016020;GO:0030246;GO:0031012;GO:0031012;GO:0043231;GO:0003674;GO:0005575;GO:0005576;GO:0005615;GO:0007155;GO:0008150;GO:0030154;GO:0040011;GO:0043167;GO:0048856;GO:0048870;	ENSOCUG00000002898	GO:0005509;GO:0005515;GO:0005925;GO:0070062;GO:0003674;GO:0043167;	#			hydrolase activity, acting on carbon-nitrogen	GO:0016810	0	0	2	0.0022805	2	0.000933707	88	0.0013122	0.58113	0.235727	-	ENSOCUG00000023532;ENSOCUG00000009215	#
ENSOCUG00000002624	-	ENSOCUG00000003316	GO:0006629;GO:0006633;GO:0016021;GO:0016705;GO:0030148;GO:0055114;GO:0003674;GO:0005575;GO:0006629;GO:0008150;GO:0009058;GO:0016491;GO:0044281;	#			hydrolase activity, acting on glycosyl bonds	GO:0016798	2	0.00158103	3	0.00342075	5	0.00233427	108	0.00161043	0.0909	1.04144	ENSOCUG00000002336;ENSOCUG00000021771	ENSOCUG00000026988;ENSOCUG00000013891;ENSOCUG00000014705	#
ENSOCUG00000002658	GO:0000287;GO:0000287;GO:0004725;GO:0004725;GO:0005515;GO:0005515;GO:0005634;GO:0005634;GO:0005737;GO:0005737;GO:0005737;GO:0005739;GO:0005739;GO:0005813;GO:0006470;GO:0006470;GO:0007275;GO:0014706;GO:0014706;GO:0016576;GO:0016576;GO:0035335;GO:0097192;GO:0097192;GO:0097345;GO:0097345;GO:0003674;GO:0005575;GO:0005622;GO:0005623;GO:0005634;GO:0005737;GO:0005739;GO:0006464;GO:0006810;GO:0007005;GO:…	ENSOCUG00000003371	GO:0005515;GO:0005615;GO:0005730;GO:0005730;GO:0008430;GO:0070062;GO:0003674;GO:0005575;GO:0005622;GO:0005623;GO:0005634;GO:0005730;GO:0043226;	#			immune system process	GO:0002376	34	0.0268775	18	0.0205245	52	0.0242764	1216	0.0181322	4.16373e-06	5.38052	ENSOCUG00000023599;ENSOCUG00000021506;ENSOCUG00000014289;ENSOCUG00000004719;ENSOCUG00000006698;ENSOCUG00000027219;ENSOCUG00000011161;ENSOCUG00000016068;ENSOCUG00000008993;ENSOCUG00000005421;ENSOCUG00000006999;ENSOCUG00000000266;ENSOCUG00000008439;ENSOCUG00000003056;ENSOCUG00000022947;ENSOCUG00000008117;ENSOCUG00000004826;ENSOCUG00000005279;ENSOCUG00000012042;ENSOCUG00000010984;ENSOCUG00000003792;…	ENSOCUG00000009993;ENSOCUG00000011097;ENSOCUG00000000049;ENSOCUG00000009566;ENSOCUG00000027003;ENSOCUG00000002622;ENSOCUG00000002086;ENSOCUG00000029663;ENSOCUG00000002480;ENSOCUG00000006444;ENSOCUG00000002485;ENSOCUG00000001555;ENSOCUG00000011497;ENSOCUG00000013290;ENSOCUG00000022000;ENSOCUG00000024446;ENSOCUG00000008632;ENSOCUG00000016394	#
ENSOCUG00000002662	GO:0005515;GO:0005515;GO:0008092;GO:0016020;GO:0016021;GO:0030165;GO:0030165;GO:0048814;GO:0048814;GO:0003674;GO:0005575;GO:0008092;GO:0008150;GO:0030154;GO:0048856;	ENSOCUG00000003436	GO:0002028;GO:0003779;GO:0003779;GO:0005515;GO:0005515;GO:0005543;GO:0007409;GO:0007605;GO:0007628;GO:0009566;GO:0010459;GO:0016020;GO:0016020;GO:0019226;GO:0019902;GO:0019902;GO:0021952;GO:0022414;GO:0030424;GO:0030507;GO:0030534;GO:0033135;GO:0033270;GO:0034613;GO:0040018;GO:0043025;GO:0043194;GO:0043203;GO:0045162;GO:0061337;GO:0070062;GO:0070852;GO:0003674;GO:0005575;GO:0008092;GO:0008289;GO:…	#			isomerase activity	GO:0016853	2	0.00158103	4	0.004561	6	0.00280112	148	0.00220688	0.109891	0.959036	ENSOCUG00000000407;ENSOCUG00000014689	ENSOCUG00000000197;ENSOCUG00000021143;ENSOCUG00000012631;ENSOCUG00000009056	#
ENSOCUG00000002673	GO:0005515;GO:0005737;GO:0005737;GO:0005886;GO:0005886;GO:0005925;GO:0006605;GO:0007165;GO:0008179;GO:0008179;GO:0010739;GO:0010739;GO:0030819;GO:0030819;GO:0051018;GO:0090036;GO:0003674;GO:0005575;GO:0005622;GO:0005623;GO:0005737;GO:0005886;GO:0006605;GO:0006810;GO:0007165;GO:0008150;GO:0019899;	ENSOCUG00000003451	GO:0000079;GO:0006355;GO:0006396;GO:0019901;GO:0003674;GO:0008150;GO:0019899;GO:0034641;GO:0000079;GO:0005515;GO:0005634;GO:0005634;GO:0006355;GO:0006396;GO:0019901;GO:0003674;GO:0005575;GO:0005622;GO:0005623;GO:0005634;GO:0008150;GO:0019899;GO:0034641;GO:0043226;	#			kinase activity	GO:0016301	19	0.0150198	13	0.0148233	32	0.0149393	1026	0.015299	0.0316847	1.49915	ENSOCUG00000004340;ENSOCUG00000002848;ENSOCUG00000003056;ENSOCUG00000001618;ENSOCUG00000011745;ENSOCUG00000008229;ENSOCUG00000005279;ENSOCUG00000006698;ENSOCUG00000007999;ENSOCUG00000014657;ENSOCUG00000022947;ENSOCUG00000009050;ENSOCUG00000016277;ENSOCUG00000014689;ENSOCUG00000004958;ENSOCUG00000007978;ENSOCUG00000023790;ENSOCUG00000002902;ENSOCUG00000003792	ENSOCUG00000007056;ENSOCUG00000001353;ENSOCUG00000007403;ENSOCUG00000000435;ENSOCUG00000026281;ENSOCUG00000003451;ENSOCUG00000011858;ENSOCUG00000009934;ENSOCUG00000026988;ENSOCUG00000007069;ENSOCUG00000011097;ENSOCUG00000000197;ENSOCUG00000017069	#
ENSOCUG00000002703	GO:0000086;GO:0000122;GO:0001570;GO:0001889;GO:0003677;GO:0003677;GO:0003700;GO:0005515;GO:0005634;GO:0005634;GO:0005654;GO:0005737;GO:0006351;GO:0006355;GO:0006978;GO:0008284;GO:0008284;GO:0019901;GO:0032873;GO:0042127;GO:0043565;GO:0044212;GO:0045892;GO:0045893;GO:0045944;GO:0045944;GO:0046578;GO:0071156;GO:0090344;GO:2000377;GO:2000781;GO:0001071;GO:0003674;GO:0003677;GO:0005575;GO:0005622;GO:…	ENSOCUG00000003513	GO:0005215;GO:0005515;GO:0005739;GO:0005739;GO:0005739;GO:0006641;GO:0006641;GO:0006810;GO:0009437;GO:0009437;GO:0015075;GO:0015226;GO:0015226;GO:0015226;GO:0015491;GO:0015491;GO:0015651;GO:0015651;GO:0015697;GO:0015697;GO:0015697;GO:0015879;GO:0015879;GO:0015879;GO:0016020;GO:0016021;GO:0016324;GO:0016324;GO:0022857;GO:0030165;GO:0030165;GO:0034220;GO:0055085;GO:1902603;GO:1902603;GO:0003674;GO:…	#			ligase activity	GO:0016874	1	0.000790514	1	0.00114025	2	0.000933707	362	0.00539791	0.997279	0.0011835	ENSOCUG00000011340	ENSOCUG00000017141	#
ENSOCUG00000002826	-	ENSOCUG00000003521	GO:0000281;GO:0000281;GO:0005200;GO:0005200;GO:0005515;GO:0005515;GO:0005923;GO:0005923;GO:0007009;GO:0007009;GO:0007165;GO:0007409;GO:0007409;GO:0007411;GO:0007411;GO:0009925;GO:0009925;GO:0014704;GO:0014704;GO:0016020;GO:0016020;GO:0016323;GO:0016323;GO:0016328;GO:0016328;GO:0019228;GO:0019228;GO:0030424;GO:0030424;GO:0033268;GO:0033268;GO:0033270;GO:0033270;GO:0042383;GO:0042383;GO:0043001;GO:…	#			lipid metabolic process	GO:0006629	15	0.0118577	9	0.0102623	24	0.0112045	752	0.0112133	0.0462634	1.33476	ENSOCUG00000004958;ENSOCUG00000016942;ENSOCUG00000003056;ENSOCUG00000004221;ENSOCUG00000006698;ENSOCUG00000003499;ENSOCUG00000005899;ENSOCUG00000016771;ENSOCUG00000027838;ENSOCUG00000007620;ENSOCUG00000021580;ENSOCUG00000022947;ENSOCUG00000023599;ENSOCUG00000009279;ENSOCUG00000010340	ENSOCUG00000009679;ENSOCUG00000003513;ENSOCUG00000003316;ENSOCUG00000017141;ENSOCUG00000014705;ENSOCUG00000009328;ENSOCUG00000024446;ENSOCUG00000017544;ENSOCUG00000007056	#
ENSOCUG00000002848	GO:0000165;GO:0000165;GO:0004435;GO:0004435;GO:0004672;GO:0004672;GO:0005125;GO:0005515;GO:0005576;GO:0005615;GO:0005615;GO:0005737;GO:0005737;GO:0006468;GO:0006468;GO:0006816;GO:0006816;GO:0006874;GO:0006874;GO:0006887;GO:0006887;GO:0006954;GO:0006954;GO:0006954;GO:0006955;GO:0007159;GO:0007159;GO:0007186;GO:0007267;GO:0007267;GO:0008009;GO:0009636;GO:0009636;GO:0010759;GO:0010759;GO:0010820;GO:…	ENSOCUG00000003679	GO:0004364;GO:0005515;GO:0005737;GO:0006749;GO:0008152;GO:0016740;GO:0003674;GO:0005575;GO:0005622;GO:0005623;GO:0005737;GO:0006520;GO:0006790;GO:0008150;GO:0016765;GO:0034641;GO:0044281;	#			locomotion	GO:0040011	30	0.0237154	13	0.0148233	43	0.0200747	910	0.0135693	2.56425e-06	5.59104	ENSOCUG00000001618;ENSOCUG00000016624;ENSOCUG00000009244;ENSOCUG00000003056;ENSOCUG00000016506;ENSOCUG00000003246;ENSOCUG00000002848;ENSOCUG00000011982;ENSOCUG00000013813;ENSOCUG00000022536;ENSOCUG00000006357;ENSOCUG00000001599;ENSOCUG00000010244;ENSOCUG00000013412;ENSOCUG00000005708;ENSOCUG00000024272;ENSOCUG00000017726;ENSOCUG00000003792;ENSOCUG00000010654;ENSOCUG00000016068;ENSOCUG00000014689;…	ENSOCUG00000008632;ENSOCUG00000011781;ENSOCUG00000007403;ENSOCUG00000015957;ENSOCUG00000009056;ENSOCUG00000015552;ENSOCUG00000002562;ENSOCUG00000015301;ENSOCUG00000011097;ENSOCUG00000003521;ENSOCUG00000009566;ENSOCUG00000007622;ENSOCUG00000001407	#
ENSOCUG00000002902	GO:0000188;GO:0000188;GO:0001933;GO:0001933;GO:0004721;GO:0004721;GO:0004725;GO:0005515;GO:0005737;GO:0006470;GO:0006470;GO:0008138;GO:0016311;GO:0016787;GO:0016791;GO:0017017;GO:0035335;GO:0035335;GO:0043065;GO:0043065;GO:0051409;GO:0051409;GO:0060420;GO:0060420;GO:0070373;GO:0003674;GO:0006464;GO:0006950;GO:0008150;GO:0016791;	ENSOCUG00000003786	GO:0005198;GO:0005882;GO:0045095;GO:0003674;GO:0005198;GO:0005575;GO:0005622;GO:0005623;GO:0005856;GO:0043226;GO:0043234;	#			lyase activity	GO:0016829	3	0.00237154	1	0.00114025	4	0.00186741	260	0.00387695	0.828053	0.0819417	ENSOCUG00000003091;ENSOCUG00000014689;ENSOCUG00000009794	ENSOCUG00000000197	#
ENSOCUG00000002926	GO:0005515;GO:0005737;GO:0005815;GO:0007267;GO:0007267;GO:0008150;	ENSOCUG00000004542	GO:0005515;GO:0010923;GO:0010923;GO:0003674;GO:0008150;	#			membrane organization	GO:0061024	17	0.0134387	12	0.013683	29	0.0135387	650	0.00969238	0.000294732	3.53057	ENSOCUG00000003792;ENSOCUG00000027156;ENSOCUG00000005620;ENSOCUG00000016068;ENSOCUG00000009050;ENSOCUG00000015790;ENSOCUG00000002244;ENSOCUG00000006698;ENSOCUG00000003958;ENSOCUG00000005279;ENSOCUG00000016624;ENSOCUG00000016983;ENSOCUG00000003247;ENSOCUG00000008858;ENSOCUG00000002658;ENSOCUG00000009279;ENSOCUG00000006999	ENSOCUG00000015957;ENSOCUG00000008632;ENSOCUG00000006573;ENSOCUG00000016394;ENSOCUG00000006444;ENSOCUG00000016751;ENSOCUG00000003436;ENSOCUG00000003521;ENSOCUG00000000338;ENSOCUG00000001407;ENSOCUG00000015877;ENSOCUG00000011985	#
ENSOCUG00000002956	GO:0005515;GO:0005515;GO:0070062;GO:0003674;	ENSOCUG00000004546	-	#			methyltransferase activity	GO:0008168	1	0.000790514	0	0	1	0.000466853	150	0.0022367	0.96512	0.0154187	ENSOCUG00000008229	-	#
ENSOCUG00000003056	GO:0000166;GO:0001782;GO:0001782;GO:0001817;GO:0001817;GO:0001933;GO:0001933;GO:0002431;GO:0002431;GO:0002513;GO:0002513;GO:0002576;GO:0002576;GO:0002762;GO:0002762;GO:0002768;GO:0002768;GO:0002774;GO:0002774;GO:0002902;GO:0002902;GO:0004672;GO:0004672;GO:0004713;GO:0004713;GO:0005515;GO:0005515;GO:0005524;GO:0005634;GO:0005634;GO:0005737;GO:0005737;GO:0005794;GO:0005886;GO:0005886;GO:0005886;GO:…	ENSOCUG00000004635	GO:0003097;GO:0003097;GO:0005215;GO:0005372;GO:0005372;GO:0005794;GO:0005886;GO:0005886;GO:0005886;GO:0006810;GO:0006833;GO:0006833;GO:0006833;GO:0015168;GO:0015168;GO:0015250;GO:0015250;GO:0015250;GO:0015793;GO:0015793;GO:0016020;GO:0016020;GO:0016021;GO:0016323;GO:0016324;GO:0030659;GO:0031410;GO:0031410;GO:0042631;GO:0042631;GO:0055037;GO:0055037;GO:0070062;GO:0071280;GO:0071280;GO:0071288;GO:…	#			mitochondrion organization	GO:0007005	2	0.00158103	1	0.00114025	3	0.00140056	197	0.00293754	0.812564	0.0901422	ENSOCUG00000002658;ENSOCUG00000001618	ENSOCUG00000000197	#
ENSOCUG00000003078	GO:0004871;GO:0004930;GO:0007165;GO:0007186;GO:0016021;GO:0003674;GO:0004871;GO:0005575;GO:0007165;GO:0008150;	ENSOCUG00000004727	GO:0005254;GO:0005254;GO:0005886;GO:0005886;GO:0006821;GO:0006821;GO:0015276;GO:0015276;GO:0034220;GO:0034220;GO:1902476;GO:1902476;GO:0003674;GO:0005575;GO:0005623;GO:0005886;GO:0006810;GO:0008150;GO:0022857;GO:0055085;	#			mitosis	GO:0007067	5	0.00395257	2	0.0022805	7	0.00326797	173	0.00257966	0.0892752	1.04927	ENSOCUG00000004340;ENSOCUG00000014689;ENSOCUG00000023898;ENSOCUG00000001030;ENSOCUG00000016277	ENSOCUG00000011097;ENSOCUG00000007069	#
ENSOCUG00000003091	GO:0000166;GO:0004016;GO:0004016;GO:0006171;GO:0009190;GO:0016020;GO:0016021;GO:0016021;GO:0016829;GO:0016849;GO:0030819;GO:0035556;GO:0071361;GO:0003674;GO:0005575;GO:0007165;GO:0008150;GO:0009058;GO:0016829;GO:0034641;GO:0044281;	ENSOCUG00000004732	GO:0005509;GO:0003674;GO:0043167;	#			mRNA processing	GO:0006397	1	0.000790514	1	0.00114025	2	0.000933707	173	0.00257966	0.897393	0.0470172	ENSOCUG00000004422	ENSOCUG00000013039	#
ENSOCUG00000003165	GO:0005509;GO:0005515;GO:0003674;GO:0043167;	ENSOCUG00000004894	-	#			neurological system process	GO:0050877	14	0.0110672	13	0.0148233	27	0.012605	1400	0.0208759	0.791788	0.101391	ENSOCUG00000024399;ENSOCUG00000016624;ENSOCUG00000004422;ENSOCUG00000013367;ENSOCUG00000005620;ENSOCUG00000005721;ENSOCUG00000002244;ENSOCUG00000009050;ENSOCUG00000006731;ENSOCUG00000011340;ENSOCUG00000012868;ENSOCUG00000012042;ENSOCUG00000002203;ENSOCUG00000007052	ENSOCUG00000026281;ENSOCUG00000009436;ENSOCUG00000001353;ENSOCUG00000015957;ENSOCUG00000016394;ENSOCUG00000015301;ENSOCUG00000013292;ENSOCUG00000003436;ENSOCUG00000003521;ENSOCUG00000016061;ENSOCUG00000011985;ENSOCUG00000027230;ENSOCUG00000010652	#
ENSOCUG00000003209	-	ENSOCUG00000005107	GO:0000122;GO:0000122;GO:0001829;GO:0001829;GO:0001829;GO:0003677;GO:0003700;GO:0005515;GO:0005634;GO:0005634;GO:0005634;GO:0006355;GO:0007507;GO:0007507;GO:0008016;GO:0008016;GO:0016575;GO:0016575;GO:0043393;GO:0043393;GO:0043415;GO:0043415;GO:0043565;GO:0045596;GO:0048286;GO:0048286;GO:0051155;GO:0051155;GO:0001071;GO:0003674;GO:0003677;GO:0005575;GO:0005622;GO:0005623;GO:0005634;GO:0006464;GO:…	#			nitrogen cycle metabolic process	GO:0071941	0	0	0	0	0	0	4	5.96454e-05	1	0	-	-	#
ENSOCUG00000003214	GO:0005515;GO:0008284;GO:0008284;GO:0043066;GO:0043066;GO:0003674;GO:0008150;	ENSOCUG00000005205	GO:0005509;GO:0005737;GO:0005813;GO:0005886;GO:0045111;GO:0046872;GO:0003674;GO:0005575;GO:0005622;GO:0005623;GO:0005737;GO:0005815;GO:0005856;GO:0005886;GO:0043167;GO:0043226;	#			nucleic acid binding transcription factor activity	GO:0001071	17	0.0134387	10	0.0114025	27	0.012605	1043	0.0155525	0.221221	0.655174	ENSOCUG00000002703;ENSOCUG00000012339;ENSOCUG00000001723;ENSOCUG00000009050;ENSOCUG00000021506;ENSOCUG00000011746;ENSOCUG00000017424;ENSOCUG00000006698;ENSOCUG00000014289;ENSOCUG00000023019;ENSOCUG00000008439;ENSOCUG00000001212;ENSOCUG00000002759;ENSOCUG00000004030;ENSOCUG00000024363;ENSOCUG00000000104;ENSOCUG00000010244	ENSOCUG00000024446;ENSOCUG00000029663;ENSOCUG00000002086;ENSOCUG00000005107;ENSOCUG00000015877;ENSOCUG00000000145;ENSOCUG00000026988;ENSOCUG00000008688;ENSOCUG00000015177;ENSOCUG00000023877	#
ENSOCUG00000003246	GO:0001502;GO:0001822;GO:0001822;GO:0001937;GO:0001937;GO:0002063;GO:0002063;GO:0003094;GO:0003094;GO:0003824;GO:0004065;GO:0004065;GO:0005509;GO:0005615;GO:0005783;GO:0005794;GO:0005886;GO:0005886;GO:0007155;GO:0008152;GO:0008449;GO:0008449;GO:0008484;GO:0009986;GO:0010575;GO:0010575;GO:0014846;GO:0014846;GO:0016525;GO:0016525;GO:0030177;GO:0030177;GO:0030201;GO:0030201;GO:0030336;GO:0030336;GO:…	ENSOCUG00000005396	GO:0004859;GO:0005576;GO:0043086;GO:0003674;GO:0005575;GO:0005576;GO:0008150;GO:0030234;	#			nucleotidyltransferase activity	GO:0016779	0	0	0	0	0	0	125	0.00186392	1	0	-	-	#
ENSOCUG00000003247	GO:0004872;GO:0004888;GO:0005515;GO:0005537;GO:0005886;GO:0006898;GO:0007165;GO:0009986;GO:0010008;GO:0030246;GO:0071222;GO:0071346;GO:0071353;GO:0003674;	ENSOCUG00000005502	-	#			oxidoreductase activity	GO:0016491	15	0.0118577	9	0.0102623	24	0.0112045	723	0.0107809	0.0316704	1.49935	ENSOCUG00000014689;ENSOCUG00000016942;ENSOCUG00000009444;ENSOCUG00000004221;ENSOCUG00000004733;ENSOCUG00000006698;ENSOCUG00000003499;ENSOCUG00000027838;ENSOCUG00000016771;ENSOCUG00000000407;ENSOCUG00000007620;ENSOCUG00000021580;ENSOCUG00000000148;ENSOCUG00000010340;ENSOCUG00000011843	ENSOCUG00000009153;ENSOCUG00000017744;ENSOCUG00000022885;ENSOCUG00000000197;ENSOCUG00000003316;ENSOCUG00000014307;ENSOCUG00000001230;ENSOCUG00000008560;ENSOCUG00000016986	#
ENSOCUG00000003499	GO:0004768;GO:0004768;GO:0005506;GO:0006629;GO:0006633;GO:0016020;GO:0016717;GO:0020037;GO:0055114;GO:0003674;GO:0006629;GO:0008150;GO:0009058;GO:0016491;GO:0043167;GO:0044281;	ENSOCUG00000005808	GO:0005515;GO:0005737;GO:0007015;GO:0007015;GO:0007507;GO:0007507;GO:0008092;GO:0008092;GO:0008270;GO:0008307;GO:0008307;GO:0015629;GO:0015629;GO:0046872;GO:0003674;GO:0005198;GO:0005575;GO:0005622;GO:0005623;GO:0005856;GO:0007010;GO:0008092;GO:0008150;GO:0043167;GO:0043226;GO:0048856;	#			phosphatase activity	GO:0016791	9	0.00711462	3	0.00342075	12	0.00560224	293	0.00436903	0.030154	1.52066	ENSOCUG00000005279;ENSOCUG00000006698;ENSOCUG00000001573;ENSOCUG00000013753;ENSOCUG00000002658;ENSOCUG00000007999;ENSOCUG00000023898;ENSOCUG00000004958;ENSOCUG00000002902	ENSOCUG00000000793;ENSOCUG00000004542;ENSOCUG00000001407	#
ENSOCUG00000003768	GO:0001135;GO:0001974;GO:0005102;GO:0005125;GO:0005125;GO:0005146;GO:0005146;GO:0005576;GO:0005737;GO:0006366;GO:0006955;GO:0007566;GO:0008083;GO:0008083;GO:0008284;GO:0008284;GO:0008285;GO:0019827;GO:0030324;GO:0033138;GO:0033141;GO:0042503;GO:0042511;GO:0042517;GO:0043410;GO:0045595;GO:0045651;GO:0045835;GO:0045944;GO:0045944;GO:0046697;GO:0046888;GO:0048286;GO:0048644;GO:0048666;GO:0048711;GO:…	ENSOCUG00000005827	GO:0005509;GO:0005515;GO:0005578;GO:0005615;GO:0007179;GO:0030162;GO:0031012;GO:0046879;GO:0050431;GO:0070062;GO:0003674;GO:0043167;	#			photosynthesis	GO:0015979	0	0	0	0	0	0	7	0.000104379	1	0	-	-	#
ENSOCUG00000003792	GO:0000187;GO:0001786;GO:0001937;GO:0001937;GO:0001953;GO:0001968;GO:0002040;GO:0002544;GO:0002581;GO:0002605;GO:0003151;GO:0003197;GO:0003417;GO:0005178;GO:0005509;GO:0005515;GO:0005576;GO:0005577;GO:0005615;GO:0005615;GO:0006954;GO:0006955;GO:0007050;GO:0007155;GO:0008201;GO:0009749;GO:0009897;GO:0009986;GO:0010595;GO:0010596;GO:0010748;GO:0010751;GO:0010754;GO:0010757;GO:0010763;GO:0010811;GO:…	ENSOCUG00000005924	GO:0001939;GO:0005215;GO:0005355;GO:0005355;GO:0005515;GO:0005515;GO:0005622;GO:0005737;GO:0005737;GO:0005829;GO:0005886;GO:0005886;GO:0005887;GO:0006461;GO:0006461;GO:0006810;GO:0015758;GO:0015758;GO:0015758;GO:0016020;GO:0016020;GO:0016021;GO:0016323;GO:0022857;GO:0022891;GO:0030496;GO:0030496;GO:0030864;GO:0030864;GO:0031982;GO:0033300;GO:0042149;GO:0042802;GO:0042802;GO:0043621;GO:0043621;GO:…	#			pigmentation	GO:0043473	3	0.00237154	0	0	3	0.00140056	63	0.000939415	0.162085	0.790256	ENSOCUG00000004221;ENSOCUG00000000999;ENSOCUG00000000407	-	#
ENSOCUG00000003866	GO:0005201;GO:0005509;GO:0005515;GO:0005578;GO:0003674;GO:0005198;GO:0005575;GO:0005576;GO:0005578;GO:0043167;GO:0001501;GO:0001501;GO:0001527;GO:0001527;GO:0005201;GO:0005509;GO:0005515;GO:0005515;GO:0005578;GO:0005604;GO:0005604;GO:0005615;GO:0005615;GO:0007507;GO:0007507;GO:0031012;GO:0031012;GO:0070062;GO:0003674;GO:0005198;GO:0005575;GO:0005576;GO:0005578;GO:0005615;GO:0008150;GO:0043167;GO:…	ENSOCUG00000005933	GO:0003824;GO:0005739;GO:0005739;GO:0008152;GO:0003674;GO:0005575;GO:0005622;GO:0005623;GO:0005737;GO:0005739;GO:0008150;GO:0043226;	#			plasma membrane organization	GO:0007009	2	0.00158103	5	0.00570125	7	0.00326797	139	0.00207268	0.0347201	1.45942	ENSOCUG00000005279;ENSOCUG00000016624	ENSOCUG00000008632;ENSOCUG00000000338;ENSOCUG00000003521;ENSOCUG00000016751;ENSOCUG00000016394	#
ENSOCUG00000003958	GO:0005044;GO:0005515;GO:0006898;GO:0016020;GO:0003674;GO:0005575;GO:0006810;GO:0008150;GO:0016192;	ENSOCUG00000006361	-	#			protein binding transcription factor activity	GO:0000988	3	0.00237154	2	0.0022805	5	0.00233427	305	0.00454796	0.805466	0.0939528	ENSOCUG00000015449;ENSOCUG00000003768;ENSOCUG00000001212	ENSOCUG00000027806;ENSOCUG00000015177	#
ENSOCUG00000004030	GO:0003676;GO:0046872;GO:0003674;GO:0043167;GO:0000122;GO:0000978;GO:0001077;GO:0001078;GO:0003676;GO:0003677;GO:0003700;GO:0005634;GO:0005634;GO:0005654;GO:0005794;GO:0006366;GO:0006366;GO:0045944;GO:0046872;GO:0003674;GO:0005575;GO:0005622;GO:0005623;GO:0005634;GO:0008150;GO:0009058;GO:0034641;GO:0043167;GO:0043226;	ENSOCUG00000006365	GO:0005515;GO:0003674;	#			protein folding	GO:0006457	1	0.000790514	2	0.0022805	3	0.00140056	129	0.00192356	0.543954	0.264438	ENSOCUG00000011745	ENSOCUG00000012631;ENSOCUG00000009056	#
ENSOCUG00000004185	GO:0005515;GO:0044822;GO:0003674;	ENSOCUG00000006426	-	#			protein maturation	GO:0051604	25	0.0197628	23	0.0262258	48	0.022409	1065	0.0158806	2.44208e-06	5.61224	ENSOCUG00000016068;ENSOCUG00000006462;ENSOCUG00000027156;ENSOCUG00000001992;ENSOCUG00000001235;ENSOCUG00000029247;ENSOCUG00000000370;ENSOCUG00000003792;ENSOCUG00000004205;ENSOCUG00000008781;ENSOCUG00000014289;ENSOCUG00000006698;ENSOCUG00000011746;ENSOCUG00000024308;ENSOCUG00000016983;ENSOCUG00000001616;ENSOCUG00000001618;ENSOCUG00000006999;ENSOCUG00000000721;ENSOCUG00000006357;ENSOCUG00000011340;…	ENSOCUG00000008560;ENSOCUG00000000049;ENSOCUG00000021262;ENSOCUG00000005827;ENSOCUG00000023396;ENSOCUG00000024805;ENSOCUG00000014389;ENSOCUG00000009566;ENSOCUG00000029657;ENSOCUG00000010762;ENSOCUG00000001353;ENSOCUG00000006444;ENSOCUG00000020941;ENSOCUG00000011858;ENSOCUG00000008071;ENSOCUG00000023877;ENSOCUG00000016573;ENSOCUG00000014749;ENSOCUG00000001230;ENSOCUG00000020975;ENSOCUG00000001555;…	#
ENSOCUG00000004205	GO:0003824;GO:0004252;GO:0005739;GO:0005739;GO:0006508;GO:0003674;GO:0005575;GO:0005622;GO:0005623;GO:0005737;GO:0005739;GO:0008150;GO:0008233;GO:0043226;	ENSOCUG00000006444	GO:0001933;GO:0001942;GO:0004866;GO:0005576;GO:0005615;GO:0009986;GO:0010839;GO:0010951;GO:0030512;GO:0045616;GO:0050431;GO:0061045;GO:0072675;GO:0003674;GO:0005575;GO:0005576;GO:0005615;GO:0008150;GO:0030234;	#			reproduction	GO:0000003	12	0.00948617	9	0.0102623	21	0.00980392	639	0.00952835	0.0463227	1.33421	ENSOCUG00000007620;ENSOCUG00000005094;ENSOCUG00000008858;ENSOCUG00000011340;ENSOCUG00000003768;ENSOCUG00000001616;ENSOCUG00000000266;ENSOCUG00000004687;ENSOCUG00000011745;ENSOCUG00000005133;ENSOCUG00000014689;ENSOCUG00000003246	ENSOCUG00000001555;ENSOCUG00000016061;ENSOCUG00000007069;ENSOCUG00000003436;ENSOCUG00000001230;ENSOCUG00000011097;ENSOCUG00000014358;ENSOCUG00000009056;ENSOCUG00000027444	#
ENSOCUG00000004221	GO:0005507;GO:0005515;GO:0005515;GO:0006582;GO:0008152;GO:0010008;GO:0010008;GO:0016491;GO:0016716;GO:0030318;GO:0030669;GO:0030669;GO:0032438;GO:0033162;GO:0042438;GO:0042470;GO:0042470;GO:0042803;GO:0042803;GO:0043438;GO:0043473;GO:0046872;GO:0046982;GO:0046982;GO:0055114;GO:0003674;GO:0005575;GO:0005622;GO:0005623;GO:0005737;GO:0005768;GO:0008150;GO:0009058;GO:0016023;GO:0016491;GO:0019748;GO:…	ENSOCUG00000006573	GO:0000139;GO:0005515;GO:0005886;GO:0015031;GO:0016021;GO:0031201;GO:0032588;GO:0034976;GO:0045806;GO:0045956;GO:0050715;GO:0055038;GO:0005575;GO:0006810;GO:0008150;	#			response to stress	GO:0006950	41	0.0324111	33	0.0376283	74	0.0345472	1709	0.0254835	1.82499e-08	7.73874	ENSOCUG00000016624;ENSOCUG00000009244;ENSOCUG00000001212;ENSOCUG00000003247;ENSOCUG00000002848;ENSOCUG00000013813;ENSOCUG00000006357;ENSOCUG00000002703;ENSOCUG00000003792;ENSOCUG00000010654;ENSOCUG00000011452;ENSOCUG00000006462;ENSOCUG00000016277;ENSOCUG00000014689;ENSOCUG00000022947;ENSOCUG00000006731;ENSOCUG00000016771;ENSOCUG00000012042;ENSOCUG00000005279;ENSOCUG00000009543;ENSOCUG00000001618;…	ENSOCUG00000000136;ENSOCUG00000015957;ENSOCUG00000024446;ENSOCUG00000008632;ENSOCUG00000005924;ENSOCUG00000005107;ENSOCUG00000011497;ENSOCUG00000011985;ENSOCUG00000009934;ENSOCUG00000026988;ENSOCUG00000002485;ENSOCUG00000014298;ENSOCUG00000008071;ENSOCUG00000011858;ENSOCUG00000002480;ENSOCUG00000006573;ENSOCUG00000029663;ENSOCUG00000002086;ENSOCUG00000016394;ENSOCUG00000012972;ENSOCUG00000011842;…	#
ENSOCUG00000004340	GO:0000079;GO:0000922;GO:0000922;GO:0000942;GO:0000942;GO:0001701;GO:0001701;GO:0005113;GO:0005113;GO:0005515;GO:0005515;GO:0005634;GO:0005634;GO:0005737;GO:0005737;GO:0005813;GO:0005813;GO:0006468;GO:0006468;GO:0007049;GO:0007080;GO:0007080;GO:0016020;GO:0016020;GO:0016301;GO:0016301;GO:0019901;GO:0043148;GO:0043148;GO:0045787;GO:0045931;GO:0045931;GO:0048146;GO:0051301;GO:0051726;GO:0051987;GO:…	ENSOCUG00000006737	GO:0008152;GO:0016787;GO:0030855;GO:0003674;GO:0008150;	#			ribosome biogenesis	GO:0042254	0	0	1	0.00114025	1	0.000466853	87	0.00129729	0.856835	0.0671026	-	ENSOCUG00000013039	#
ENSOCUG00000004422	GO:0005515;GO:0005515;GO:0006479;GO:0006479;GO:0006974;GO:0006974;GO:0008285;GO:0008285;GO:0008306;GO:0008306;GO:0009952;GO:0009952;GO:0017148;GO:0017148;GO:0021542;GO:0021542;GO:0021954;GO:0021954;GO:0031175;GO:0031175;GO:0035914;GO:0035914;GO:0060213;GO:0060213;GO:0070062;GO:2000178;GO:2000178;GO:0006464;GO:0006950;GO:0008150;GO:0030154;GO:0048856;GO:0050877;	ENSOCUG00000006826	-	#			secondary metabolic process	GO:0019748	3	0.00237154	1	0.00114025	4	0.00186741	21	0.000313138	0.00103864	2.98354	ENSOCUG00000004221;ENSOCUG00000000407;ENSOCUG00000000999	ENSOCUG00000017744	#
ENSOCUG00000004424	-	ENSOCUG00000006974	GO:0005509;GO:0003674;GO:0043167;	#			signal transduction	GO:0007165	66	0.0521739	41	0.0467503	107	0.0499533	4092	0.0610173	0.0305116	1.51554	ENSOCUG00000015312;ENSOCUG00000011808;ENSOCUG00000011746;ENSOCUG00000009050;ENSOCUG00000005094;ENSOCUG00000021580;ENSOCUG00000016068;ENSOCUG00000011533;ENSOCUG00000002902;ENSOCUG00000001030;ENSOCUG00000010061;ENSOCUG00000007052;ENSOCUG00000009794;ENSOCUG00000024363;ENSOCUG00000003056;ENSOCUG00000016506;ENSOCUG00000002759;ENSOCUG00000016984;ENSOCUG00000005279;ENSOCUG00000014657;ENSOCUG00000007999;…	ENSOCUG00000008632;ENSOCUG00000024273;ENSOCUG00000015957;ENSOCUG00000000793;ENSOCUG00000008688;ENSOCUG00000026988;ENSOCUG00000007069;ENSOCUG00000003521;ENSOCUG00000009934;ENSOCUG00000011985;ENSOCUG00000015877;ENSOCUG00000001407;ENSOCUG00000029663;ENSOCUG00000000605;ENSOCUG00000002086;ENSOCUG00000007403;ENSOCUG00000029569;ENSOCUG00000011858;ENSOCUG00000016751;ENSOCUG00000014358;ENSOCUG00000011097;…	#
ENSOCUG00000004460	GO:0003416;GO:0003416;GO:0003677;GO:0005634;GO:0005634;GO:0005654;GO:0005737;GO:0005737;GO:0005886;GO:0005886;GO:0043586;GO:0043586;GO:0046872;GO:0060021;GO:0060021;GO:0060485;GO:0060485;GO:0003674;GO:0005575;GO:0005622;GO:0005623;GO:0005737;GO:0005886;GO:0008150;GO:0040007;GO:0043167;GO:0048856;	ENSOCUG00000006985	-	#			small molecule metabolic process	GO:0044281	31	0.0245059	18	0.0205245	49	0.0228758	2008	0.029942	0.247882	0.605755	ENSOCUG00000003091;ENSOCUG00000014689;ENSOCUG00000004221;ENSOCUG00000011533;ENSOCUG00000002673;ENSOCUG00000010654;ENSOCUG00000003792;ENSOCUG00000005899;ENSOCUG00000006698;ENSOCUG00000000778;ENSOCUG00000016771;ENSOCUG00000027838;ENSOCUG00000002038;ENSOCUG00000022947;ENSOCUG00000021580;ENSOCUG00000003246;ENSOCUG00000016942;ENSOCUG00000001212;ENSOCUG00000016506;ENSOCUG00000022112;ENSOCUG00000010198;…	ENSOCUG00000008560;ENSOCUG00000015801;ENSOCUG00000009215;ENSOCUG00000007056;ENSOCUG00000016751;ENSOCUG00000014358;ENSOCUG00000014298;ENSOCUG00000000338;ENSOCUG00000017141;ENSOCUG00000001230;ENSOCUG00000003679;ENSOCUG00000011985;ENSOCUG00000003513;ENSOCUG00000003316;ENSOCUG00000024273;ENSOCUG00000009644;ENSOCUG00000015634;ENSOCUG00000002483	#
ENSOCUG00000004590	GO:0003431;GO:0005201;GO:0005201;GO:0005581;GO:0005583;GO:0030198;GO:0003674;GO:0005198;GO:0005575;GO:0005576;GO:0005578;	ENSOCUG00000007056	GO:0005515;GO:0005518;GO:0005576;GO:0005578;GO:0005583;GO:0005615;GO:0005615;GO:0005622;GO:0006629;GO:0006631;GO:0006641;GO:0006952;GO:0007160;GO:0008201;GO:0016337;GO:0030198;GO:0030199;GO:0031012;GO:0032963;GO:0043206;GO:0043506;GO:0048251;GO:0070062;GO:0003674;GO:0006950;GO:0008150;	#			sulfur compound metabolic process	GO:0006790	5	0.00395257	3	0.00342075	8	0.00373483	117	0.00174463	0.00444461	2.35217	ENSOCUG00000002038;ENSOCUG00000012132;ENSOCUG00000014689;ENSOCUG00000003246;ENSOCUG00000000148	ENSOCUG00000024273;ENSOCUG00000011985;ENSOCUG00000003679	#
ENSOCUG00000004687	GO:0000122;GO:0000122;GO:0001501;GO:0002244;GO:0002244;GO:0005515;GO:0005634;GO:0005737;GO:0007276;GO:0007389;GO:0008585;GO:0030509;GO:0031069;GO:0032926;GO:0032926;GO:0042475;GO:0043616;GO:0045596;GO:0048185;GO:0048185;GO:0051798;GO:0051798;GO:0002376;GO:0003674;GO:0008150;GO:0030154;GO:0048856;	ENSOCUG00000007069	GO:0000122;GO:0000166;GO:0001525;GO:0001657;GO:0001701;GO:0002053;GO:0003148;GO:0003149;GO:0004672;GO:0004713;GO:0004714;GO:0005007;GO:0005515;GO:0005515;GO:0005524;GO:0005634;GO:0005634;GO:0005654;GO:0005737;GO:0005887;GO:0005938;GO:0006468;GO:0007267;GO:0007409;GO:0007528;GO:0008284;GO:0008284;GO:0008285;GO:0008543;GO:0008543;GO:0008589;GO:0009791;GO:0009880;GO:0009887;GO:0009986;GO:0010453;GO:…	#			symbiosis, encompassing mutualism through parasitism	GO:0044403	5	0.00395257	0	0	5	0.00233427	152	0.00226653	0.245232	0.610422	ENSOCUG00000001212;ENSOCUG00000006698;ENSOCUG00000001616;ENSOCUG00000002848;ENSOCUG00000023599	-	#
ENSOCUG00000004719	GO:0002376;GO:0005515;GO:0005515;GO:0005737;GO:0005737;GO:0045087;GO:0050728;GO:0050728;GO:0050868;GO:0050868;GO:0002376;GO:0005575;GO:0005622;GO:0005623;GO:0005737;GO:0006950;GO:0008150;	ENSOCUG00000007278	-	#			transferase activity, transferring acyl groups	GO:0016746	2	0.00158103	1	0.00114025	3	0.00140056	217	0.00323576	0.860272	0.0653641	ENSOCUG00000011452;ENSOCUG00000025065	ENSOCUG00000000551	#
ENSOCUG00000004783	-	ENSOCUG00000007302	GO:0005515;GO:0005615;GO:0031012;GO:0043569;GO:0070062;GO:0003674;	#			transferase activity, transferring alkyl or aryl	GO:0016765	0	0	1	0.00114025	1	0.000466853	45	0.000671011	0.633768	0.198069	-	ENSOCUG00000003679	#
ENSOCUG00000004826	GO:0002260;GO:0002260;GO:0003158;GO:0003158;GO:0005381;GO:0005381;GO:0005515;GO:0005515;GO:0005622;GO:0005771;GO:0005771;GO:0005886;GO:0005886;GO:0005886;GO:0006826;GO:0006826;GO:0006879;GO:0006879;GO:0006879;GO:0008021;GO:0008021;GO:0016021;GO:0016323;GO:0034395;GO:0034755;GO:0034755;GO:0043066;GO:0043066;GO:0045944;GO:0048536;GO:0048536;GO:0060345;GO:0060345;GO:0060586;GO:0060586;GO:0002376;GO:…	ENSOCUG00000007403	GO:0004675;GO:0005024;GO:0005109;GO:0005109;GO:0005737;GO:0005737;GO:0005886;GO:0005886;GO:0008284;GO:0008284;GO:0008360;GO:0008360;GO:0010718;GO:0010718;GO:0016020;GO:0016477;GO:0016477;GO:0030512;GO:0030512;GO:0032092;GO:0032092;GO:0035413;GO:0035413;GO:0045893;GO:0045893;GO:0090263;GO:0090263;GO:0003674;GO:0004871;GO:0005575;GO:0005622;GO:0005623;GO:0005737;GO:0005886;GO:0008150;GO:0016301;GO:…	#			transferase activity, transferring glycosyl groups	GO:0016757	0	0	1	0.00114025	1	0.000466853	250	0.00372784	0.996321	0.00160072	-	ENSOCUG00000022791	#
ENSOCUG00000004847	GO:0005515;GO:0005886;GO:0005886;GO:0005886;GO:0007411;GO:0007411;GO:0010001;GO:0010001;GO:0014069;GO:0016198;GO:0016198;GO:0030424;GO:0030424;GO:0031527;GO:0040008;GO:0045165;GO:0045165;GO:0051489;GO:0071944;GO:0071944;GO:0000902;GO:0003674;GO:0005575;GO:0005623;GO:0005886;GO:0008150;GO:0030154;GO:0040011;GO:0048856;	ENSOCUG00000007622	GO:0001525;GO:0004888;GO:0004930;GO:0004930;GO:0005518;GO:0007166;GO:0007186;GO:0007218;GO:0007266;GO:0007420;GO:0008285;GO:0010573;GO:0016020;GO:0016021;GO:0021801;GO:0021819;GO:0035025;GO:0045785;GO:0050840;GO:0070062;GO:0070528;GO:0097451;GO:2001223;GO:0003674;GO:0004871;GO:0005575;GO:0007165;GO:0008150;	#			translation	GO:0006412	8	0.00632411	8	0.00912201	16	0.00746965	605	0.00902137	0.263704	0.578884	ENSOCUG00000022742;ENSOCUG00000006698;ENSOCUG00000023274;ENSOCUG00000027099;ENSOCUG00000026786;ENSOCUG00000025109;ENSOCUG00000004422;ENSOCUG00000003792	ENSOCUG00000029569;ENSOCUG00000024676;ENSOCUG00000002392;ENSOCUG00000023673;ENSOCUG00000022888;ENSOCUG00000027082;ENSOCUG00000029357;ENSOCUG00000027648	#
ENSOCUG00000004958	GO:0004672;GO:0004674;GO:0004713;GO:0005524;GO:0006468;GO:0009103;GO:0016020;GO:0016772;GO:0016773;GO:0003674;GO:0005575;GO:0005975;GO:0006464;GO:0006629;GO:0008150;GO:0009058;GO:0016301;GO:0043167;GO:0000166;GO:0002039;GO:0002039;GO:0004672;GO:0004674;GO:0004674;GO:0004713;GO:0005515;GO:0005524;GO:0005634;GO:0005634;GO:0005730;GO:0005737;GO:0005737;GO:0006468;GO:0009103;GO:0015630;GO:0016020;GO:…	ENSOCUG00000008071	GO:0001540;GO:0002020;GO:0002062;GO:0004866;GO:0004869;GO:0005515;GO:0005576;GO:0005576;GO:0005615;GO:0005829;GO:0006952;GO:0010466;GO:0010466;GO:0010711;GO:0010716;GO:0010951;GO:0030414;GO:0034103;GO:0043206;GO:0045861;GO:0048469;GO:0060311;GO:0060313;GO:0070062;GO:0003674;GO:0005575;GO:0005576;GO:0005622;GO:0005623;GO:0005737;GO:0005829;GO:0008150;GO:0021700;GO:0030154;GO:0030234;GO:0048856;	#			transport	GO:0006810	43	0.0339921	49	0.0558723	92	0.0429505	2719	0.040544	1.8543e-05	4.73182	ENSOCUG00000005279;ENSOCUG00000009543;ENSOCUG00000004826;ENSOCUG00000006731;ENSOCUG00000008117;ENSOCUG00000022947;ENSOCUG00000013753;ENSOCUG00000014689;ENSOCUG00000003792;ENSOCUG00000027156;ENSOCUG00000005708;ENSOCUG00000003768;ENSOCUG00000002658;ENSOCUG00000008858;ENSOCUG00000002848;ENSOCUG00000013813;ENSOCUG00000000431;ENSOCUG00000010340;ENSOCUG00000016983;ENSOCUG00000003247;ENSOCUG00000001212;…	ENSOCUG00000007448;ENSOCUG00000002435;ENSOCUG00000025898;ENSOCUG00000022885;ENSOCUG00000013450;ENSOCUG00000011097;ENSOCUG00000013292;ENSOCUG00000009443;ENSOCUG00000016751;ENSOCUG00000017841;ENSOCUG00000014298;ENSOCUG00000002086;ENSOCUG00000000605;ENSOCUG00000007403;ENSOCUG00000006573;ENSOCUG00000011985;ENSOCUG00000015877;ENSOCUG00000001407;ENSOCUG00000000197;ENSOCUG00000000793;ENSOCUG00000000338;…	#
ENSOCUG00000005094	GO:0005179;GO:0005515;GO:0005576;GO:0008083;GO:0009267;GO:0009267;GO:0009612;GO:0009612;GO:0032869;GO:0032869;GO:0032924;GO:0032924;GO:0040007;GO:0042803;GO:0042803;GO:0044320;GO:0044320;GO:0045444;GO:0045444;GO:0046676;GO:0046676;GO:0046881;GO:0046881;GO:0046882;GO:0046882;GO:0048178;GO:0048178;GO:0048471;GO:0048471;GO:0048599;GO:0048599;GO:0060279;GO:0060279;GO:2001235;GO:2001235;GO:0000003;GO:…	ENSOCUG00000008346	-	#			transposition	GO:0032196	0	0	0	0	0	0	3	4.47341e-05	1	0	-	-	#
ENSOCUG00000005133	GO:0000775;GO:0000793;GO:0005515;GO:0005634;GO:0005634;GO:0005730;GO:0005730;GO:0005737;GO:0007126;GO:0008022;GO:0008283;GO:0016020;GO:0044822;GO:0003674;	ENSOCUG00000008560	GO:0001666;GO:0005506;GO:0005515;GO:0005634;GO:0005737;GO:0006915;GO:0006919;GO:0016491;GO:0016705;GO:0016706;GO:0018126;GO:0018401;GO:0031418;GO:0031545;GO:0042127;GO:0042127;GO:0043523;GO:0055114;GO:0003674;GO:0008150;GO:0016491;GO:0043167;	#		Cellular Component	cellular component	GO:0005575	162	0.190141	159	0.180272	321	0.185121	10774	0.184543	9.23496e-14	13.0346	ENSOCUG00000002038;ENSOCUG00000012388;ENSOCUG00000001454;ENSOCUG00000010984;ENSOCUG00000007028;ENSOCUG00000016771;ENSOCUG00000022742;ENSOCUG00000005899;ENSOCUG00000015790;ENSOCUG00000017424;ENSOCUG00000006462;ENSOCUG00000015138;ENSOCUG00000025109;ENSOCUG00000014857;ENSOCUG00000002703;ENSOCUG00000000370;ENSOCUG00000003078;ENSOCUG00000005371;ENSOCUG00000002848;ENSOCUG00000011982;ENSOCUG00000000148;…	ENSOCUG00000020941;ENSOCUG00000006444;ENSOCUG00000013096;ENSOCUG00000029234;ENSOCUG00000015801;ENSOCUG00000009215;ENSOCUG00000027230;ENSOCUG00000016061;ENSOCUG00000004727;ENSOCUG00000010652;ENSOCUG00000015177;ENSOCUG00000013084;ENSOCUG00000029357;ENSOCUG00000023425;ENSOCUG00000024540;ENSOCUG00000000435;ENSOCUG00000016271;ENSOCUG00000015634;ENSOCUG00000011842;ENSOCUG00000008528;ENSOCUG00000011793;…	#
ENSOCUG00000005244	-	ENSOCUG00000008632	GO:0002523;GO:0002793;GO:0005509;GO:0005515;GO:0005615;GO:0005634;GO:0006914;GO:0006919;GO:0030593;GO:0030595;GO:0031532;GO:0045113;GO:0050729;GO:0070062;GO:0070488;GO:2001244;GO:0003674;GO:0043167;	#			cell	GO:0005623	133	0.156103	147	0.166667	280	0.161476	10579	0.181203	2.08392e-05	4.68112	ENSOCUG00000002759;ENSOCUG00000016984;ENSOCUG00000022069;ENSOCUG00000001030;ENSOCUG00000004340;ENSOCUG00000009794;ENSOCUG00000011533;ENSOCUG00000001723;ENSOCUG00000004958;ENSOCUG00000002902;ENSOCUG00000029247;ENSOCUG00000005094;ENSOCUG00000016624;ENSOCUG00000004687;ENSOCUG00000010244;ENSOCUG00000004221;ENSOCUG00000008935;ENSOCUG00000007978;ENSOCUG00000021771;ENSOCUG00000009543;ENSOCUG00000005279;…	ENSOCUG00000029569;ENSOCUG00000011858;ENSOCUG00000005933;ENSOCUG00000008071;ENSOCUG00000025985;ENSOCUG00000000145;ENSOCUG00000008097;ENSOCUG00000009679;ENSOCUG00000025898;ENSOCUG00000024446;ENSOCUG00000009644;ENSOCUG00000015957;ENSOCUG00000023053;ENSOCUG00000026830;ENSOCUG00000001822;ENSOCUG00000002485;ENSOCUG00000003371;ENSOCUG00000007069;ENSOCUG00000009934;ENSOCUG00000011985;ENSOCUG00000011497;…	#
ENSOCUG00000005279	GO:0000902;GO:0001501;GO:0001502;GO:0001540;GO:0001568;GO:0001654;GO:0001666;GO:0001837;GO:0001974;GO:0003007;GO:0003179;GO:0004702;GO:0005102;GO:0005114;GO:0005160;GO:0005160;GO:0005515;GO:0005515;GO:0005576;GO:0005576;GO:0005615;GO:0005615;GO:0005768;GO:0006468;GO:0007050;GO:0007179;GO:0007184;GO:0007411;GO:0007435;GO:0007507;GO:0008083;GO:0008219;GO:0008284;GO:0008285;GO:0008347;GO:0009611;GO:…	ENSOCUG00000008647	GO:0005509;GO:0005730;GO:0005737;GO:0008270;GO:0046872;GO:0003674;GO:0043167;	#			cytoplasm	GO:0005737	86	0.100939	76	0.0861678	162	0.0934256	6152	0.105375	0.00515016	2.28818	ENSOCUG00000007620;ENSOCUG00000004030;ENSOCUG00000006752;ENSOCUG00000009279;ENSOCUG00000016942;ENSOCUG00000010853;ENSOCUG00000005133;ENSOCUG00000001616;ENSOCUG00000002203;ENSOCUG00000006698;ENSOCUG00000008781;ENSOCUG00000004719;ENSOCUG00000004205;ENSOCUG00000023599;ENSOCUG00000002244;ENSOCUG00000005721;ENSOCUG00000002673;ENSOCUG00000010852;ENSOCUG00000008127;ENSOCUG00000008579;ENSOCUG00000025844;…	ENSOCUG00000001555;ENSOCUG00000009705;ENSOCUG00000017141;ENSOCUG00000022888;ENSOCUG00000026988;ENSOCUG00000000793;ENSOCUG00000000338;ENSOCUG00000009328;ENSOCUG00000000136;ENSOCUG00000024273;ENSOCUG00000013039;ENSOCUG00000013450;ENSOCUG00000015993;ENSOCUG00000002392;ENSOCUG00000014298;ENSOCUG00000008647;ENSOCUG00000002480;ENSOCUG00000000968;ENSOCUG00000029244;ENSOCUG00000007403;ENSOCUG00000006573;…	#
ENSOCUG00000005371	GO:0005509;GO:0005515;GO:0005515;GO:0005576;GO:0005604;GO:0005604;GO:0007155;GO:0008201;GO:0016525;GO:0016525;GO:0016525;GO:0031012;GO:0031012;GO:0031091;GO:0003674;GO:0005575;GO:0005576;GO:0005578;GO:0007155;GO:0008150;GO:0043167;	ENSOCUG00000009017	GO:0005515;GO:0005576;GO:0005578;GO:0005615;GO:0005615;GO:0008083;GO:0031012;GO:0031012;GO:0031982;GO:0070062;GO:0003674;GO:0005575;GO:0005576;GO:0005578;GO:0005615;	#			cytosol	GO:0005829	8	0.00938967	8	0.00907029	16	0.00922722	679	0.0116303	0.429215	0.367325	ENSOCUG00000017723;ENSOCUG00000011982;ENSOCUG00000000148;ENSOCUG00000010340;ENSOCUG00000000407;ENSOCUG00000025109;ENSOCUG00000016984;ENSOCUG00000011745	ENSOCUG00000001353;ENSOCUG00000005924;ENSOCUG00000016271;ENSOCUG00000010762;ENSOCUG00000024446;ENSOCUG00000008071;ENSOCUG00000012972;ENSOCUG00000002435	#
ENSOCUG00000005402	-	ENSOCUG00000009056	GO:0003756;GO:0005515;GO:0006457;GO:0007286;GO:0016477;GO:0045454;GO:0008150;GO:0042592;	#			external encapsulating structure	GO:0030312	0	0	0	0	0	0	4	6.85143e-05	1	0	-	-	#
ENSOCUG00000005421	GO:0005515;GO:0006955;GO:0016020;GO:0019882;GO:0002376;GO:0003674;GO:0005575;GO:0008150;	ENSOCUG00000009148	-	#			extracellular region	GO:0005576	72	0.084507	67	0.0759637	139	0.0801615	2743	0.0469837	1.03632e-21	20.9845	ENSOCUG00000002613;ENSOCUG00000014657;ENSOCUG00000017338;ENSOCUG00000005279;ENSOCUG00000009543;ENSOCUG00000012042;ENSOCUG00000003792;ENSOCUG00000029278;ENSOCUG00000002336;ENSOCUG00000015020;ENSOCUG00000011482;ENSOCUG00000011350;ENSOCUG00000016624;ENSOCUG00000024308;ENSOCUG00000005094;ENSOCUG00000009050;ENSOCUG00000021580;ENSOCUG00000024465;ENSOCUG00000015312;ENSOCUG00000027400;ENSOCUG00000027219;…	ENSOCUG00000011842;ENSOCUG00000024540;ENSOCUG00000012972;ENSOCUG00000016573;ENSOCUG00000029263;ENSOCUG00000002607;ENSOCUG00000011793;ENSOCUG00000001353;ENSOCUG00000029234;ENSOCUG00000020941;ENSOCUG00000006444;ENSOCUG00000013084;ENSOCUG00000023425;ENSOCUG00000000195;ENSOCUG00000000049;ENSOCUG00000002562;ENSOCUG00000009566;ENSOCUG00000007622;ENSOCUG00000027230;ENSOCUG00000011781;ENSOCUG00000008632;…	#
ENSOCUG00000005527	GO:0003779;GO:0005515;GO:0031032;GO:0003674;GO:0007010;GO:0008092;GO:0008150;	ENSOCUG00000009153	GO:0004497;GO:0005506;GO:0016491;GO:0016705;GO:0020037;GO:0046872;GO:0055114;GO:0003674;GO:0008150;GO:0016491;GO:0043167;	#			extracellular space	GO:0005615	30	0.0352113	25	0.0283447	55	0.0317186	689	0.0118016	1.63954e-16	15.7853	ENSOCUG00000003246;ENSOCUG00000015320;ENSOCUG00000011350;ENSOCUG00000001616;ENSOCUG00000009244;ENSOCUG00000011745;ENSOCUG00000001599;ENSOCUG00000002848;ENSOCUG00000022536;ENSOCUG00000016277;ENSOCUG00000016068;ENSOCUG00000015138;ENSOCUG00000014689;ENSOCUG00000005708;ENSOCUG00000003866;ENSOCUG00000013412;ENSOCUG00000011452;ENSOCUG00000029278;ENSOCUG00000003792;ENSOCUG00000011161;ENSOCUG00000014077;…	ENSOCUG00000008632;ENSOCUG00000005924;ENSOCUG00000015957;ENSOCUG00000020975;ENSOCUG00000002607;ENSOCUG00000015877;ENSOCUG00000017141;ENSOCUG00000001230;ENSOCUG00000003371;ENSOCUG00000007302;ENSOCUG00000026988;ENSOCUG00000006444;ENSOCUG00000008071;ENSOCUG00000027003;ENSOCUG00000029663;ENSOCUG00000007056;ENSOCUG00000009017;ENSOCUG00000029657;ENSOCUG00000009566;ENSOCUG00000011097;ENSOCUG00000000049;…	#
ENSOCUG00000005708	GO:0001886;GO:0003421;GO:0005179;GO:0005576;GO:0005615;GO:0005615;GO:0005634;GO:0005737;GO:0006874;GO:0010596;GO:0030336;GO:0035988;GO:0044070;GO:0051926;GO:0060348;GO:0086004;GO:0090280;GO:1903403;GO:0003674;GO:0005575;GO:0005576;GO:0005615;	ENSOCUG00000009215	GO:0004668;GO:0005509;GO:0005634;GO:0005737;GO:0006464;GO:0018101;GO:0003674;GO:0005575;GO:0005622;GO:0005623;GO:0005634;GO:0005737;GO:0006464;GO:0006520;GO:0008150;GO:0009058;GO:0016810;GO:0043167;GO:0043226;GO:0044281;	#			intracellular	GO:0005622	119	0.139671	133	0.150794	252	0.145329	8850	0.151588	1.88063e-07	6.7257	ENSOCUG00000004340;ENSOCUG00000009122;ENSOCUG00000001030;ENSOCUG00000022069;ENSOCUG00000000664;ENSOCUG00000024363;ENSOCUG00000026786;ENSOCUG00000016506;ENSOCUG00000003056;ENSOCUG00000002759;ENSOCUG00000011745;ENSOCUG00000024399;ENSOCUG00000016984;ENSOCUG00000008229;ENSOCUG00000011808;ENSOCUG00000023019;ENSOCUG00000005094;ENSOCUG00000009050;ENSOCUG00000024465;ENSOCUG00000011746;ENSOCUG00000012339;…	ENSOCUG00000017544;ENSOCUG00000007056;ENSOCUG00000014011;ENSOCUG00000021675;ENSOCUG00000027444;ENSOCUG00000029195;ENSOCUG00000023673;ENSOCUG00000016394;ENSOCUG00000023535;ENSOCUG00000013290;ENSOCUG00000015132;ENSOCUG00000021074;ENSOCUG00000003513;ENSOCUG00000014311;ENSOCUG00000003451;ENSOCUG00000023492;ENSOCUG00000002622;ENSOCUG00000027648;ENSOCUG00000013079;ENSOCUG00000002435;ENSOCUG00000017069;…	#
ENSOCUG00000005721	GO:0001974;GO:0001975;GO:0001987;GO:0001996;GO:0001997;GO:0004871;GO:0004930;GO:0004935;GO:0004937;GO:0004937;GO:0005634;GO:0005886;GO:0006937;GO:0007165;GO:0007186;GO:0007512;GO:0007626;GO:0008542;GO:0016020;GO:0016021;GO:0016021;GO:0016049;GO:0019229;GO:0031965;GO:0035265;GO:0042593;GO:0043278;GO:0043410;GO:0045818;GO:0045819;GO:0046982;GO:0048148;GO:0055117;GO:0071875;GO:0003674;GO:0004871;GO:…	ENSOCUG00000009328	GO:0005739;GO:0005739;GO:0008654;GO:0016020;GO:0016780;GO:0003674;GO:0005575;GO:0005622;GO:0005623;GO:0005737;GO:0005739;GO:0006629;GO:0008150;GO:0009058;GO:0043226;GO:0008654;GO:0016020;GO:0016780;GO:0003674;GO:0005575;GO:0006629;GO:0008150;GO:0009058;	#			microtubule organizing center	GO:0005815	5	0.00586854	6	0.00680272	11	0.00634371	405	0.00693707	0.283434	0.547547	ENSOCUG00000002658;ENSOCUG00000002926;ENSOCUG00000004340;ENSOCUG00000007028;ENSOCUG00000023898	ENSOCUG00000001822;ENSOCUG00000005205;ENSOCUG00000016394;ENSOCUG00000025898;ENSOCUG00000024446;ENSOCUG00000009644	#
ENSOCUG00000005885	GO:0005515;GO:0003674;	ENSOCUG00000009395	GO:0001948;GO:0001948;GO:0005515;GO:0005515;GO:0010628;GO:0010628;GO:0010765;GO:0010765;GO:0010976;GO:0010976;GO:0021549;GO:0021549;GO:0030246;GO:0030246;GO:0031175;GO:0031175;GO:0070062;GO:0003674;GO:0008150;GO:0030154;GO:0048856;	#			nuclear envelope	GO:0005635	2	0.00234742	0	0	2	0.0011534	207	0.00354561	0.944674	0.0247182	ENSOCUG00000011746;ENSOCUG00000005721	-	#
ENSOCUG00000005899	GO:0000902;GO:0001726;GO:0001946;GO:0005886;GO:0006693;GO:0006928;GO:0007165;GO:0008283;GO:0009897;GO:0016021;GO:0016337;GO:0030027;GO:0030175;GO:0030324;GO:0048286;GO:0051272;GO:2000045;GO:0005575;	ENSOCUG00000009414	-	#			nucleoplasm	GO:0005654	18	0.0211268	8	0.00907029	26	0.0149942	1701	0.0291357	0.984197	0.0069181	ENSOCUG00000014289;ENSOCUG00000008781;ENSOCUG00000013753;ENSOCUG00000011746;ENSOCUG00000021506;ENSOCUG00000012339;ENSOCUG00000022950;ENSOCUG00000002703;ENSOCUG00000009122;ENSOCUG00000011340;ENSOCUG00000024363;ENSOCUG00000028094;ENSOCUG00000004030;ENSOCUG00000002132;ENSOCUG00000008439;ENSOCUG00000001212;ENSOCUG00000004460;ENSOCUG00000010853	ENSOCUG00000001353;ENSOCUG00000024446;ENSOCUG00000027806;ENSOCUG00000009934;ENSOCUG00000007069;ENSOCUG00000015177;ENSOCUG00000023877;ENSOCUG00000013039	#
ENSOCUG00000006258	GO:0005515;GO:0003674;	ENSOCUG00000009436	GO:0000166;GO:0005216;GO:0005216;GO:0005516;GO:0006810;GO:0006811;GO:0007608;GO:0007608;GO:0016020;GO:0016021;GO:0030552;GO:0034220;GO:0050896;GO:0055085;GO:0003674;GO:0005575;GO:0006810;GO:0008150;GO:0022857;GO:0043167;GO:0050877;GO:0055085;	#			organelle	GO:0043226	114	0.133803	135	0.153061	249	0.143599	8424	0.144291	6.2529e-09	8.20392	ENSOCUG00000015790;ENSOCUG00000017424;ENSOCUG00000008117;ENSOCUG00000015449;ENSOCUG00000022947;ENSOCUG00000006731;ENSOCUG00000001454;ENSOCUG00000023274;ENSOCUG00000016771;ENSOCUG00000007028;ENSOCUG00000022742;ENSOCUG00000017019;ENSOCUG00000002703;ENSOCUG00000005708;ENSOCUG00000022950;ENSOCUG00000002470;ENSOCUG00000025109;ENSOCUG00000015138;ENSOCUG00000014857;ENSOCUG00000011982;ENSOCUG00000002132;…	ENSOCUG00000013096;ENSOCUG00000009215;ENSOCUG00000029234;ENSOCUG00000015801;ENSOCUG00000016061;ENSOCUG00000013084;ENSOCUG00000029357;ENSOCUG00000015177;ENSOCUG00000024540;ENSOCUG00000008528;ENSOCUG00000015634;ENSOCUG00000016271;ENSOCUG00000011842;ENSOCUG00000023877;ENSOCUG00000014195;ENSOCUG00000000968;ENSOCUG00000002480;ENSOCUG00000006573;ENSOCUG00000014192;ENSOCUG00000024522;ENSOCUG00000000605;…	#
ENSOCUG00000006321	GO:0003779;GO:0005515;GO:0031032;GO:0003674;GO:0007010;GO:0008092;GO:0008150;	ENSOCUG00000009566	GO:0002523;GO:0002523;GO:0002793;GO:0005509;GO:0005515;GO:0005615;GO:0005634;GO:0006914;GO:0006914;GO:0006919;GO:0006919;GO:0008017;GO:0008270;GO:0030593;GO:0030593;GO:0035662;GO:0045087;GO:0046872;GO:0050544;GO:0050727;GO:0050729;GO:0050729;GO:0050786;GO:0070062;GO:0070488;GO:0070488;GO:2001244;GO:2001244;GO:0002376;GO:0003674;GO:0006950;GO:0007155;GO:0008092;GO:0008150;GO:0008219;GO:0008289;GO:…	#			plasma membrane	GO:0005886	55	0.064554	43	0.0487528	98	0.0565167	4086	0.0699873	0.192635	0.715264	ENSOCUG00000008629;ENSOCUG00000003056;ENSOCUG00000011745;ENSOCUG00000001616;ENSOCUG00000009203;ENSOCUG00000001030;ENSOCUG00000004030;ENSOCUG00000009794;ENSOCUG00000009279;ENSOCUG00000014625;ENSOCUG00000006752;ENSOCUG00000005721;ENSOCUG00000005620;ENSOCUG00000008993;ENSOCUG00000002673;ENSOCUG00000000999;ENSOCUG00000017726;ENSOCUG00000008127;ENSOCUG00000008781;ENSOCUG00000006698;ENSOCUG00000002203;…	ENSOCUG00000013290;ENSOCUG00000003513;ENSOCUG00000010156;ENSOCUG00000015301;ENSOCUG00000023877;ENSOCUG00000012972;ENSOCUG00000016394;ENSOCUG00000026791;ENSOCUG00000000539;ENSOCUG00000017744;ENSOCUG00000010652;ENSOCUG00000005205;ENSOCUG00000004727;ENSOCUG00000022791;ENSOCUG00000014307;ENSOCUG00000015177;ENSOCUG00000022123;ENSOCUG00000004635;ENSOCUG00000001353;ENSOCUG00000017544;ENSOCUG00000014011;…	#
ENSOCUG00000006357	GO:0004222;GO:0005515;GO:0005576;GO:0005578;GO:0006508;GO:0007160;GO:0008233;GO:0008237;GO:0008270;GO:0016477;GO:0030167;GO:0031012;GO:0032331;GO:0050727;GO:0051603;GO:0071347;GO:0071356;GO:0071773;GO:1901509;GO:1902203;GO:1902548;GO:2001113;GO:0003674;GO:0005575;GO:0005576;GO:0005578;GO:0008150;GO:0008233;GO:0043167;	ENSOCUG00000009644	GO:0000166;GO:0000242;GO:0003924;GO:0005525;GO:0005874;GO:0006184;GO:0007017;GO:0043234;GO:0051258;GO:0051297;GO:0003674;GO:0003924;GO:0005575;GO:0005622;GO:0005623;GO:0005737;GO:0005815;GO:0005856;GO:0006461;GO:0007010;GO:0008150;GO:0009056;GO:0022607;GO:0034641;GO:0034655;GO:0043167;GO:0043226;GO:0043234;GO:0044281;GO:0065003;	#			protein complex	GO:0043234	27	0.0316901	67	0.0759637	94	0.0542099	2880	0.0493303	5.90474e-05	4.2288	ENSOCUG00000008220;ENSOCUG00000016624;ENSOCUG00000011745;ENSOCUG00000001212;ENSOCUG00000022112;ENSOCUG00000010853;ENSOCUG00000024196;ENSOCUG00000008629;ENSOCUG00000002132;ENSOCUG00000028094;ENSOCUG00000001030;ENSOCUG00000011340;ENSOCUG00000004340;ENSOCUG00000023790;ENSOCUG00000009699;ENSOCUG00000029278;ENSOCUG00000017726;ENSOCUG00000003792;ENSOCUG00000008993;ENSOCUG00000011746;ENSOCUG00000015790;…	ENSOCUG00000002607;ENSOCUG00000014195;ENSOCUG00000015615;ENSOCUG00000024540;ENSOCUG00000016271;ENSOCUG00000015634;ENSOCUG00000008528;ENSOCUG00000010652;ENSOCUG00000013084;ENSOCUG00000013096;ENSOCUG00000014202;ENSOCUG00000029234;ENSOCUG00000000338;ENSOCUG00000003786;ENSOCUG00000009003;ENSOCUG00000011781;ENSOCUG00000022000;ENSOCUG00000017233;ENSOCUG00000026324;ENSOCUG00000008999;ENSOCUG00000013450;…	#
ENSOCUG00000006462	GO:0001701;GO:0009897;GO:0045916;GO:0005575;GO:0005623;GO:0005886;GO:0008150;GO:0009790;GO:0048856;	ENSOCUG00000009679	GO:0005739;GO:0005739;GO:0005759;GO:0005759;GO:0016290;GO:0016290;GO:0035336;GO:0035336;GO:0035965;GO:0035965;GO:0003674;GO:0005575;GO:0005622;GO:0005623;GO:0005737;GO:0005739;GO:0006629;GO:0008150;GO:0043226;GO:0051186;	#			proteinaceous extracellular matrix	GO:0005578	21	0.0246479	8	0.00907029	29	0.0167243	209	0.00357987	3.0416e-15	14.5169	ENSOCUG00000015143;ENSOCUG00000012042;ENSOCUG00000002613;ENSOCUG00000024465;ENSOCUG00000011482;ENSOCUG00000015138;ENSOCUG00000014857;ENSOCUG00000013367;ENSOCUG00000028053;ENSOCUG00000011042;ENSOCUG00000000370;ENSOCUG00000003866;ENSOCUG00000015020;ENSOCUG00000001525;ENSOCUG00000006357;ENSOCUG00000004590;ENSOCUG00000005371;ENSOCUG00000022093;ENSOCUG00000024308;ENSOCUG00000009244;ENSOCUG00000000266	ENSOCUG00000005827;ENSOCUG00000009017;ENSOCUG00000011793;ENSOCUG00000027230;ENSOCUG00000024805;ENSOCUG00000015957;ENSOCUG00000007056;ENSOCUG00000002407	#
ENSOCUG00000006698	GO:0000060;GO:0000060;GO:0000122;GO:0000122;GO:0000122;GO:0000165;GO:0000165;GO:0000185;GO:0000185;GO:0000187;GO:0000187;GO:0001819;GO:0001819;GO:0001891;GO:0001891;GO:0001932;GO:0001932;GO:0001934;GO:0001934;GO:0002020;GO:0002020;GO:0002020;GO:0002439;GO:0002439;GO:0002740;GO:0002740;GO:0002876;GO:0002876;GO:0002925;GO:0002925;GO:0005125;GO:0005125;GO:0005125;GO:0005164;GO:0005164;GO:0005515;GO:…	ENSOCUG00000009705	GO:0005515;GO:0005737;GO:0005739;GO:0030156;GO:0003674;	#			thylakoid	GO:0009579	0	0	0	0	0	0	0	0	1	0	-	-	#
ENSOCUG00000006731	GO:0001657;GO:0001662;GO:0005102;GO:0005515;GO:0005737;GO:0007214;GO:0007406;GO:0007411;GO:0007412;GO:0007611;GO:0007623;GO:0007631;GO:0008038;GO:0008083;GO:0014047;GO:0016023;GO:0016358;GO:0019222;GO:0021675;GO:0032229;GO:0033138;GO:0042490;GO:0042493;GO:0042596;GO:0043066;GO:0043523;GO:0043524;GO:0045666;GO:0046668;GO:0048167;GO:0048471;GO:0048675;GO:0048839;GO:0051965;GO:0060548;GO:0061193;GO:…	ENSOCUG00000009869	-	#		Molecular Function	molecular function	GO:0003674	224	0.569975	193	0.543662	417	0.557487	14496	0.56008	1.84601e-20	19.7338	ENSOCUG00000005885;ENSOCUG00000010244;ENSOCUG00000004687;ENSOCUG00000016624;ENSOCUG00000022491;ENSOCUG00000028173;ENSOCUG00000023566;ENSOCUG00000013753;ENSOCUG00000014657;ENSOCUG00000009543;ENSOCUG00000004847;ENSOCUG00000005279;ENSOCUG00000021771;ENSOCUG00000015020;ENSOCUG00000004221;ENSOCUG00000006258;ENSOCUG00000007978;ENSOCUG00000003091;ENSOCUG00000009794;ENSOCUG00000023450;ENSOCUG00000010061;…	ENSOCUG00000012631;ENSOCUG00000017841;ENSOCUG00000002480;ENSOCUG00000000968;ENSOCUG00000014192;ENSOCUG00000006573;ENSOCUG00000000605;ENSOCUG00000029663;ENSOCUG00000014422;ENSOCUG00000008992;ENSOCUG00000013039;ENSOCUG00000015993;ENSOCUG00000011097;ENSOCUG00000025593;ENSOCUG00000009328;ENSOCUG00000009003;ENSOCUG00000000136;ENSOCUG00000012044;ENSOCUG00000017233;ENSOCUG00000024273;ENSOCUG00000011781;…	#
[truncated: 181 more rows]

## Sheet: KEGG Enrichment Analysis
Category	Pathway	Genome	DE Gene	P-value	-Log10(P-Value)
Metabolism	Overview	182	2	0.912677	0.0396829
	Carbohydrate metabolism	410	7	0.802454	0.0955801
[truncated: 40 more rows]
